# Supplementary material
Source: MDPI journal article supplement (https://www.mdpi.com/1422-0067/19/11/3328)
Supplement: s1 [file s1]

[illegible]
