# Supplementary material for: IL-18 and S100A12 Are Upregulated in Experimental Central Retinal Vein Occlusion
Source: Int J Mol Sci. 2018 Oct 25;19(11):3328. doi: 10.3390/ijms19113328 (PMC6274751; doi:10.3390/ijms19113328)
Supplement: Supplementary file 1 [file ijms-19-03328-s001.zip]

Archive with 6 entries (6 files):
- Supplementary file 5.pdf
- Supplementary file 6.pdf
- Supplementary file 1.txt
- Supplementary file 2.txt
- Supplementary file 3.doc
- Supplementary file 4.pdf
