# Supplementary material for: IL-18 and S100A12 Are Upregulated in Experimental Central Retinal Vein Occlusion
Source: Int J Mol Sci. 2018 Oct 25;19(11):3328. doi: 10.3390/ijms19113328 (PMC6274751; doi:10.3390/ijms19113328)
Supplement: Supplementary file 1 [file ijms-19-03328-s001.zip › Supplementary file 1.txt]

1H	2H	3H	4H	5H	1V	2V	3V	4V	5V	Contaminant	Modifications	Chromosome	Student's T-test Significant CRVO_Control	Student's T-test significant	# Peptides	# PSMs	# Unique Peptides	# Protein Groups	# AAs	# Razor Peptides	# Peptides Sequest HT	Student's T-test p-value CRVO_Control	Student's T-test q-value CRVO_Control	Student's T-test Difference CRVO_Control	Student's T-test Test statistic CRVO_Control	Gene ID	Description	Accession
#!{Type}E	E	E	E	E	E	E	E	E	E	C	C	C	C	C	N	N	N	N	N	N	N	N	N	N	N	T	T	T
#!{C:Group1}CRVO	CRVO	CRVO	CRVO	CRVO	Control	Control	Control	Control	Control
4,371509	4,41935	3,972722	4,589457	4,232334	7,476542	7,027315	7,784865	7,60942	7,44873	FALSK		14	+	CRVO_Control	22	161	4	1	455	0	22	8,46E-05	0,00076693	3,152300167	1,436543768	LOC100625407;NEFM	Neurofilament medium polypeptide [OS=Sus scrofa]	P08552
4,631317	4,381971	3,999972	4,82781	4,64013	7,447724	7,519588	7,587964	7,441282	7,328398	FALSK		5	+	CRVO_Control	2	7	2	1	134	0	2	7,72E-05	0,0007394	2,96875124	1,362502276	CPLX2	complexin-2 [OS=Homo sapiens]	Q6PUV4
4,814788	4,749445	4,227951	4,277045	4,459059	7,533711	7,658556	7,29736	7,520757	7,290009	FALSK		9	+	CRVO_Control	14	225	14	1	373	0	14	5,63E-06	0,000496456	2,954421043	1,412175934	GLUL	Glutamine synthetase [OS=Sus scrofa]	P46410
4,979436	4,527641	3,862871	4,563597	4,583157	7,373262	7,569856	7,545097	7,456809	7,356427	FALSK	Acetyl [N-Term]	16	+	CRVO_Control	3	13	3	1	67	0	3	0,000149685	0,001022441	2,956949806	1,337540032	GNG13	Guanine nucleotide-binding protein G(I)/G(S)/G(O) subunit gamma-13 [OS=Homo sapiens]	Q9P2W3
5,282684	4,133112	4,573933	4,234658	4,70842	7,236012	7,473157	7,623811	7,31424	7,568707	FALSK		13	+	CRVO_Control	8	126	8	1	348	0	8	0,000278021	0,00137955	2,856623936	1,276189007	RHO	Rhodopsin [OS=Sus scrofa]	O18766
5,126297	4,71898	4,065362	4,652256	4,671882	7,429487	7,537986	7,493733	7,467604	7,28216	FALSK		4	+	CRVO_Control	2	9	2	1	134	0	2	0,0001098	0,000889427	2,79523859	1,279789395	CPLX1	Complexin-1 [OS=Homo sapiens]	O14810
5,058172	4,434411	4,628694	4,411158	4,850783	7,416044	7,479536	7,596941	7,255377	7,437001	FALSK		4	+	CRVO_Control	6	19	4	1	759	2	6	2,67E-05	0,000518828	2,760336113	1,297630351	CNGA1	Isoform 2 of cGMP-gated cation channel alpha-1 [OS=Homo sapiens]	P29973-2
4,665671	4,438136	4,603544	4,725348	4,98139	7,355834	7,280139	7,331089	7,551199	7,642371	FALSK		X	+	CRVO_Control	20	100	19	1	391	1	20	1,80E-07	0,000341854	2,749308681	1,350208159	ARR3	Arrestin-C [OS=Sus scrofa]	Q7YS78
4,925968	4,770209	4,575204	4,43626	4,870362	7,556451	7,399089	7,143108	7,507394	7,547656	FALSK		10	+	CRVO_Control	7	42	7	1	1247	0	7	7,41E-06	0,000492774	2,715138626	1,298688093	RBP3	Retinol-binding protein 3 [OS=Homo sapiens]	P10745
4,757554	4,675226	4,570734	4,94862	4,756666	7,381949	7,060153	7,698344	7,514894	7,449953	FALSK		14	+	CRVO_Control	23	212	4	1	549	17	23	2,65E-05	0,000519725	2,679298592	1,261908342	NEFL	Neurofilament light polypeptide [OS=Sus scrofa]	P02547
5,035624	4,529821	4,683696	4,83289	4,716991	7,470049	7,494256	7,383704	7,449562	7,358431	FALSK		1	+	CRVO_Control	2	3	2	1	198	0	2	6,30E-06	0,000487314	2,671395874	1,28084227	RGS8	Isoform 2 of Regulator of G-protein signaling 8 [OS=Homo sapiens]	P57771-2
4,807217	4,699564	4,618569	4,935267	4,827094	7,484613	7,077347	7,643694	7,546508	7,331781	FALSK		8	+	CRVO_Control	23	161	5	1	916	15	23	1,73E-05	0,000481059	2,639246559	1,251422041	NEFM	Neurofilament medium polypeptide [OS=Homo sapiens]	P07197
4,744161	4,791777	4,712608	4,90049	4,810706	7,419497	6,998731	7,699098	7,49612	7,437931	FALSK		8	+	CRVO_Control	21	212	2	1	543	0	21	2,99E-05	0,000548437	2,618327141	1,232605944	NEFL	Neurofilament light polypeptide [OS=Homo sapiens]	P07196
4,990641	4,960794	4,612097	4,783693	4,800616	7,265359	7,296827	7,619078	7,229257	7,621229	FALSK		6	+	CRVO_Control	2	6	2	1	201	0	2	5,63E-05	0,0006526	2,57678175	1,202225506	GUCA1A	Guanylyl cyclase-activating protein 1 [OS=Homo sapiens]	P43080
5,019651	4,611011	4,636945	5,103599	4,992288	7,374964	7,320444	7,480915	7,494028	7,380495	FALSK		10	+	CRVO_Control	13	38	13	1	585	0	13	1,44E-05	0,000487716	2,537470436	1,208233725	GAD2	Glutamate decarboxylase 2 [OS=Sus scrofa]	P48321
4,802768	4,674253	4,759975	5,075413	5,026264	7,632112	7,244873	7,566843	7,462053	7,056138	FALSK		1	+	CRVO_Control	2	4	2	1	296	0	2	6,94E-05	0,00070892	2,524669075	1,175323998	FBXO2	F-box only protein 2 [OS=Homo sapiens]	Q9UK22
4,905318	4,487723	4,682811	5,307203	5,028969	7,368926	7,443226	7,333563	7,402132	7,489414	FALSK		3	+	CRVO_Control	4	15	4	1	599	0	4	5,61E-05	0,000656776	2,525047302	1,179727672	SLC6A1	Sodium- and chloride-dependent GABA transporter 1 [OS=Homo sapiens]	P30531
4,942177	5,284121	4,639039	4,808642	4,679172	7,549341	7,41883	7,252964	7,474401	7,260228	FALSK		12	+	CRVO_Control	6	14	6	1	694	0	6	1,33E-05	0,000502745	2,520522881	1,201721336	RPH3A	Rabphilin-3A [OS=Homo sapiens]	Q9Y2J0-1
5,291419	4,701773	4,481911	5,100633	5,066044	7,3995	7,334493	7,384945	7,431663	7,43917	FALSK		19	+	CRVO_Control	10	23	4	1	367	0	10	5,52E-05	0,000651648	2,469598293	1,155806066	ELAVL3	ELAV-like protein 3 [OS=Homo sapiens]	Q14576
5,044288	4,772192	5,01169	4,787959	5,297442	7,325467	7,562613	7,437772	7,249674	7,368435	FALSK		2	+	CRVO_Control	4	10	4	1	637	0	4	3,43E-05	0,000575519	2,406077671	1,13594399	MPP4	MAGUK p55 subfamily member 4 [OS=Homo sapiens]	Q96JB8-1
4,997488	4,751038	5,013504	4,891876	5,158842	7,267741	7,29124	7,505369	7,304787	7,564068	FALSK		10	+	CRVO_Control	16	35	14	1	858	0	16	7,73E-07	0,0003661	2,424091244	1,184826148	PDE6C	Cone cGMP-specific 3',5'-cyclic phosphodiesterase subunit alpha' [OS=Homo sapiens]	P51160
4,255006	5,147712	4,724616	5,310742	5,327318	7,342515	7,439088	7,44128	7,35886	7,354532	FALSK		9	+	CRVO_Control	33	181	2	1	864	0	33	0,000288871	0,001411222	2,434176254	1,103861869	DNM1	Isoform 2 of Dynamin-1 [OS=Homo sapiens]	Q05193-2
4,666577	5,022033	4,953829	5,151959	5,224094	7,363072	7,416573	7,437936	7,448318	7,272319	FALSK		5	+	CRVO_Control	7	57	3	1	134	1	7	2,39E-05	0,000517019	2,383944893	1,131536896	SNCB	Beta-synuclein [OS=Homo sapiens]	Q16143
5,10463	5,053909	4,769065	5,126924	5,111084	7,348256	7,100996	7,581442	7,416815	7,427501	FALSK		22	+	CRVO_Control	14	130	11	1	1026	0	14	5,05E-05	0,000640085	2,341879654	1,101157832	NEFH	Neurofilament heavy polypeptide [OS=Homo sapiens]	P12036
5,53557	4,442085	4,981911	4,617899	5,345977	7,19571	7,375777	7,418794	7,158261	7,697913	FALSK		6	+	CRVO_Control	6	32	6	1	346	0	6	0,000322339	0,001506764	2,384602451	1,080624598	PRPH2	Peripherin-2 [OS=Homo sapiens]	P23942
5,095005	4,998689	4,892383	5,095826	5,1258	7,354002	7,469997	7,46438	7,299179	7,317768	FALSK		7	+	CRVO_Control	4	31	3	1	74	1	4	6,95E-06	0,000487683	2,339524841	1,126461166	GNGT1	Guanine nucleotide-binding protein G(T) subunit gamma-T1 [OS=Homo sapiens]	P63211
5,096035	5,050922	5,06032	4,899147	5,137969	7,209369	7,198971	7,660233	7,347163	7,435375	FALSK		X	+	CRVO_Control	2	14	2	1	364	0	2	1,43E-05	0,000490014	2,321343613	1,109883345	OPN1LW	Long-wave-sensitive opsin 1 [OS=Homo sapiens]	P04000
5,457454	4,846674	4,597256	5,196158	5,09768	7,29062	7,384365	7,408398	7,401267	7,401229	FALSK		12	+	CRVO_Control	5	21	3	1	233	0	5	0,000140341	0,001000061	2,338131332	1,08050351	LIN7A	Protein lin-7 homolog A [OS=Homo sapiens]	O14910
5,031111	5,113338	4,947992	4,876575	5,337008	7,085252	7,512048	7,380186	7,128628	7,691242	FALSK		6	+	CRVO_Control	20	332	12	1	430	11	20	4,61E-06	0,000499549	2,298266315	1,11126631	GOT2	Aspartate aminotransferase, mitochondrial [OS=Sus scrofa]	P00506
5,388616	5,405988	4,783959	5,080169	4,824286	7,416055	7,498942	7,491452	7,275757	7,122038	FALSK		14	+	CRVO_Control	3	9	3	1	5795	0	3	4,64E-05	0,000614684	2,264244938	1,068069208	AHNAK2	Protein AHNAK2 [OS=Homo sapiens]	Q8IVF2-1
5,464019	5,247848	4,869823	5,076624	5,054262	7,3958	7,320109	7,37851	7,427552	7,270881	FALSK		1	+	CRVO_Control	3	6	3	1	854	0	3	2,59E-05	0,0005214	2,216055584	1,054601841	ESPN	espin [OS=Homo sapiens]	B1AK53-1
5,82271	5,003128	4,689028	4,950871	5,12993	7,387125	7,373279	7,403547	7,370687	7,242213	FALSK		8	+	CRVO_Control	9	32	6	1	140	3	9	0,00031875	0,001493675	2,236236668	1,019588342	SNCA	Alpha-synuclein [OS=Sus scrofa]	Q3I5G7
5,590911	5,157802	4,612098	5,328369	5,108761	7,316504	7,415541	7,374515	7,406412	7,239831	FALSK		15	+	CRVO_Control	5	45	4	1	158	0	5	0,000199146	0,001165067	2,190972328	1,010634449	CPLX3	Complexin-3 [OS=Homo sapiens]	Q8WVH0
5,456115	5,007812	4,984132	5,097354	5,39391	7,423312	7,38928	7,363687	7,341541	7,226412	FALSK		18	+	CRVO_Control	6	52	5	1	160	1	6	4,18E-05	0,000614501	2,160981846	1,02342155	CPLX4	Complexin-4 [OS=Homo sapiens]	Q7Z7G2
5,369131	5,13468	4,918404	5,290506	5,253917	7,307219	7,380026	7,373732	7,249344	7,431737	FALSK		2	+	CRVO_Control	18	66	18	1	669	0	18	2,33E-05	0,000523536	2,155083942	1,028177335	GLS	Glutaminase kidney isoform, mitochondrial [OS=Homo sapiens]	O94925-1
5,502511	4,994768	5,348701	4,976953	5,171482	7,303786	7,342921	7,542353	7,145988	7,369609	FALSK		3	+	CRVO_Control	15	214	11	1	350	3	15	1,92E-05	0,000501971	2,14204874	1,024478044	GNAT1	Guanine nucleotide-binding protein G(t) subunit alpha-1 [OS=Homo sapiens]	P11488
5,352816	5,006934	4,920507	5,331022	5,265144	7,320648	7,406792	7,338573	7,345764	7,29822	FALSK		15	+	CRVO_Control	11	22	11	1	594	0	11	2,63E-05	0,000519722	2,166714668	1,032009985	GAD1	Glutamate decarboxylase 1 [OS=Sus scrofa]	P48319
5,626143	5,136058	4,792011	5,346116	5,164495	7,259669	7,466382	7,386723	7,390975	7,182481	FALSK		5	+	CRVO_Control	2	8	2	1	219	0	2	0,000193356	0,001150724	2,124281311	0,982741627	TPPP	Tubulin polymerization-promoting protein [OS=Homo sapiens]	O94811
5,217324	5,0091	5,120729	5,420043	5,407612	7,356964	7,320566	7,437471	7,358214	7,20543	FALSK		7	+	CRVO_Control	4	16	4	1	118	0	4	3,37E-05	0,000577644	2,100767422	0,999101702	ATP6V1G2	V-type proton ATPase subunit G 2 [OS=Sus scrofa]	Q9TSV6
5,719604	5,124735	4,791212	5,631817	4,971961	7,696879	7,098046	7,1903	7,683888	6,743875	FALSK		17	+	CRVO_Control	2	5	2	1	1624	0	2	3,77E-05	0,000590005	2,034731865	0,967871506	ABCA9	ATP-binding cassette sub-family A member 9 [OS=Homo sapiens]	Q8IUA7-1
5,543506	5,299562	4,744302	5,350063	5,420829	7,347429	7,340734	7,179497	7,373882	7,384393	FALSK		5	+	CRVO_Control	8	70	4	1	227	0	8	3,91E-05	0,000604754	2,053534603	0,97592753	RAB3C	ras-related protein Rab-3C [OS=Homo sapiens]	Q96E17
5,442944	5,307428	5,197708	5,303781	5,303781	7,204571	7,366322	7,367197	7,310158	7,364573	FALSK		22	+	CRVO_Control	3	3	3	1	820	0	3	7,71E-06	0,000495663	2,01143589	0,972713939	ELFN2	Protein phosphatase 1 regulatory subunit 29 [OS=Homo sapiens]	Q5R3F8
5,092847	5,352531	5,31185	5,208768	5,540668	7,259983	7,453942	7,43476	7,33252	7,088871	FALSK		17	+	CRVO_Control	2	5	2	1	440	0	2	6,61E-05	0,000712106	2,012682343	0,950899094	OMG	Oligodendrocyte-myelin glycoprotein [OS=Homo sapiens]	P23515
5,265081	5,109057	5,241303	5,522361	5,436049	7,174913	7,424798	7,349718	7,229257	7,402579	FALSK		2	+	CRVO_Control	3	5	2	1	287	1	3	3,92E-05	0,000604384	2,001482773	0,952345396	C1QL2	Complement C1q-like protein 2 [OS=Homo sapiens]	Q7Z5L3
5,397289	5,2133	5,527804	5,380647	5,082956	7,327318	7,378441	7,508461	7,121621	7,220081	FALSK	Acetyl [N-Term]	13	+	CRVO_Control	3	6	3	1	563	0	3	1,32E-05	0,000504295	1,990785122	0,958575509	GRK1	Rhodopsin kinase [OS=Homo sapiens]	Q15835
5,375496	5,132608	5,177912	5,553948	5,407612	7,225087	7,358758	7,355101	7,364779	7,273804	FALSK		2	+	CRVO_Control	13	27	7	1	1118	6	13	2,37E-05	0,000519662	1,985990429	0,950759817	SLC4A10	Sodium-driven chloride bicarbonate exchanger [OS=Homo sapiens]	Q6U841
5,385844	5,164557	4,992779	5,391916	5,636772	7,211228	7,36594	7,328929	7,409689	7,242196	FALSK		19	+	CRVO_Control	5	11	4	1	198	0	5	0,000105957	0,000873224	1,997222805	0,937493379	DIRAS1	GTP-binding protein Di-Ras1 [OS=Homo sapiens]	O95057
5,580746	5,262652	4,925711	5,401016	5,448071	7,37937	7,308111	7,282372	7,340184	7,248806	FALSK		19	+	CRVO_Control	24	475	3	1	444	1	24	4,26E-05	0,000600353	1,98812952	0,945339732	TUBB4A	Tubulin beta-4A chain [OS=Homo sapiens]	P04350
5,730226	5,344387	5,060119	5,282094	5,217398	7,310085	7,452466	7,334054	7,35622	7,083981	FALSK		11	+	CRVO_Control	4	8	4	1	813	0	4	7,71E-05	0,000740085	1,980516624	0,934515785	MAP6	Microtubule-associated protein 6 [OS=Homo sapiens]	Q96JE9-1
5,49485	5,117391	5,225894	5,539059	5,315825	7,257659	7,337398	7,382439	7,250942	7,32761	FALSK		9	+	CRVO_Control	7	17	6	1	199	0	7	4,23E-05	0,000598852	1,972605896	0,938389161	DIRAS2	GTP-binding protein Di-Ras2 [OS=Homo sapiens]	Q96HU8
5,601307	5,428854	5,120825	5,298933	5,311049	7,042278	7,335268	7,556005	7,227375	7,344234	FALSK		1;CHR_HSCHR1_5_CTG32_1	+	CRVO_Control	2	7	2	1	75	0	2	0,00025265	0,00129432	1,94883852	0,902778565	GNG4	Guanine nucleotide-binding protein G(I)/G(S)/G(O) subunit gamma-4 [OS=Homo sapiens]	P50150
5,575001	5,316679	4,966609	5,426039	5,450135	7,31019	7,27889	7,351019	7,308443	7,289499	FALSK		3	+	CRVO_Control	9	18	9	1	501	0	9	6,27E-05	0,000688881	1,960715771	0,928333861	CAMKV	caM kinase-like vesicle-associated protein [OS=Homo sapiens]	Q8NCB2-1
5,578228	5,321279	5,149695	5,300049	5,502777	7,1908	7,268549	7,354012	7,255971	7,452447	FALSK		1	+	CRVO_Control	14	233	4	1	416	11	14	3,32E-05	0,000576951	1,933950138	0,923500732	LOC100519994;CKMT1B	Creatine kinase U-type, mitochondrial [OS=Sus scrofa]	Q29577
4,684951	5,327676	5,67069	5,356522	5,684798	7,32688	7,126684	7,422475	7,283088	7,344612	FALSK		6	+	CRVO_Control	2	12	2	1	797	0	2	0,000380051	0,001701031	1,95582056	0,898468132	IMPG1	Interphotoreceptor matrix proteoglycan 1 [OS=Homo sapiens]	Q17R60
5,83153	5,286113	4,970304	5,35671	5,380235	7,217043	7,071127	7,473764	7,433631	7,284859	FALSK		10	+	CRVO_Control	13	116	10	1	499	1	13	0,00045461	0,001904341	1,931106377	0,884678407	INA	alpha-internexin [OS=Homo sapiens]	Q16352
5,590576	5,289681	5,392983	5,178226	5,442352	7,258246	7,104853	7,607358	6,965277	7,473738	FALSK		1	+	CRVO_Control	7	83	3	1	354	0	7	4,06E-05	0,000602931	1,903130531	0,907349456	GNAT2	Guanine nucleotide-binding protein G(T) subunit alpha-2 [OS=Homo sapiens]	P19087
5,556503	5,436049	5,092289	5,538177	5,273679	7,275855	7,258585	7,260555	7,37288	7,323681	FALSK		10	+	CRVO_Control	12	23	7	1	4377	0	12	2,01E-05	0,000504179	1,918972015	0,921550185	ANK3	Ankyrin-3 [OS=Homo sapiens]	Q12955
5,733533	5,328583	4,798375	5,618097	5,412587	7,307868	7,346918	7,283366	7,340718	7,207951	FALSK		8	+	CRVO_Control	2	8	2	1	179	0	2	0,000267334	0,001337021	1,919129086	0,889076309	NDUFB9	NADH dehydrogenase [ubiquinone] 1 beta subcomplex subunit 9 [OS=Homo sapiens]	Q9Y6M9
5,123388	5,591278	5,218481	5,51074	5,552692	7,305577	7,326762	7,297612	7,223089	7,330903	FALSK		X	+	CRVO_Control	4	21	2	1	106	0	4	4,05E-05	0,000604993	1,897472572	0,904782354	LOC100525850;IDH3G	isocitrate dehydrogenase [NAD] subunit gamma, mitochondrial [OS=Sus scrofa]	P41566
5,61394	5,232834	5,11876	5,557596	5,48199	7,266271	7,291804	7,282149	7,316804	7,329455	FALSK		5	+	CRVO_Control	2	11	2	1	175	0	2	3,64E-05	0,000591566	1,896272469	0,905370249	NDUFS4	NADH dehydrogenase [ubiquinone] iron-sulfur protein 4, mitochondrial [OS=Homo sapiens]	O43181
5,600655	5,387155	5,12926	5,521275	5,428854	7,280029	7,381606	7,175691	7,295504	7,333002	FALSK		22	+	CRVO_Control	3	5	3	1	284	0	3	1,03E-05	0,000505192	1,879726887	0,908904101	SULT4A1	Sulfotransferase 4A1 [OS=Homo sapiens]	Q9BR01
5,673683	5,328481	5,201357	5,471023	5,393176	7,290933	7,300934	7,384542	7,272367	7,222954	FALSK		9	+	CRVO_Control	28	206	28	1	594	0	28	3,74E-05	0,000588943	1,880802155	0,898016455	STXBP1	Syntaxin-binding protein 1 [OS=Homo sapiens]	P61764
5,442673	5,185861	5,214033	5,611615	5,604632	7,295525	7,299657	7,353094	7,342772	7,178136	FALSK		X	+	CRVO_Control	14	39	13	1	705	1	14	6,65E-05	0,00070866	1,882073975	0,892307806	SYN1	Synapsin-1 [OS=Homo sapiens]	P17600
5,460195	5,420609	5,217575	5,54502	5,487609	7,143126	7,331732	7,298603	7,227978	7,446632	FALSK		7	+	CRVO_Control	3	14	3	1	81	0	3	1,89E-05	0,000503962	1,863412666	0,896426536	NDUFA4	Cytochrome c oxidase subunit NDUFA4 [OS=Homo sapiens]	O00483
5,498477	5,291988	5,414092	5,506106	5,447924	7,254899	7,288795	7,320719	7,307302	7,284681	FALSK	Acetyl [N-Term]		+	CRVO_Control	39	146	39	1	1358	0	39	1,59E-06	0,000500978	1,859561539	0,91056804		Isoform 4 of Calcium-dependent secretion activator 1 [OS=Homo sapiens]	Q9ULU8-4
5,254888	5,160028	5,371331	5,626608	5,67002	7,240194	7,299747	7,302299	7,324553	7,279868	FALSK		2	+	CRVO_Control	12	54	11	1	191	1	12	4,19E-05	0,000610902	1,872757721	0,893194404	VSNL1	Visinin-like protein 1 [OS=Homo sapiens]	P62760
5,552542	5,460734	5,134481	5,610068	5,424068	7,29461	7,35622	7,291321	7,330836	7,163937	FALSK		12	+	CRVO_Control	2	6	2	1	377	0	2	2,36E-05	0,000522347	1,851006031	0,888764999	NDUFA9	NADH dehydrogenase [ubiquinone] 1 alpha subcomplex subunit 9, mitochondrial [OS=Homo sapiens]	Q16795
5,529439	5,107676	5,46773	5,504817	5,536539	7,207549	7,375018	7,140831	7,151161	7,523604	FALSK		X	+	CRVO_Control	7	29	7	1	224	0	7	0,00010842	0,000883916	1,850392723	0,872206992	RS1	Retinoschisin [OS=Homo sapiens]	O15537
5,418664	5,347562	5,427909	5,428889	5,592934	7,173922	7,221446	7,399098	7,281354	7,351615	FALSK		13	+	CRVO_Control	11	30	11	1	553	0	11	1,35E-06	0,000512798	1,842295361	0,90300819	GRK7	Rhodopsin kinase [OS=Sus scrofa]	Q8WP15
5,673839	5,403194	5,192861	5,495803	5,475438	7,228328	7,311513	7,315547	7,288098	7,284441	FALSK		7	+	CRVO_Control	16	54	15	1	695	1	16	3,71E-05	0,000593464	1,837358284	0,878276411	AMPH	amphiphysin [OS=Homo sapiens]	P49418
5,649183	5,11492	5,214222	5,6864	5,530834	7,101077	7,31744	7,357204	7,2941	7,338981	FALSK		7	+	CRVO_Control	10	45	6	1	666	0	10	0,000229479	0,001249933	1,842648506	0,858474479	CAMK2B	Calcium/calmodulin-dependent protein kinase type II subunit beta [OS=Homo sapiens]	Q13554-1
5,700437	5,39746	5,240188	5,521985	5,411078	7,220134	7,279227	7,340294	7,313336	7,266475	FALSK		6	+	CRVO_Control	14	46	12	1	907	3	14	3,99E-05	0,000609302	1,829663467	0,874060844	SNAP91	Clathrin coat assembly protein AP180 [OS=Homo sapiens]	O60641-1
5,501829	5,37475	5,44675	5,381971	5,608782	7,288458	7,310575	7,319565	7,140347	7,34853	FALSK		17	+	CRVO_Control	6	14	6	1	858	0	6	1,04E-06	0,000437055	1,818678665	0,892772621	DRK1;KCNB1	Potassium voltage-gated channel subfamily B member 1 [OS=Sus scrofa]	O18868
5,694856	5,461061	5,227813	5,410728	5,538304	7,166383	7,301943	7,309659	7,220125	7,395723	FALSK		3	+	CRVO_Control	17	268	17	1	338	0	17	5,01E-05	0,000641649	1,812214088	0,863827738	MDH2	Malate dehydrogenase, mitochondrial [OS=Sus scrofa]	P00346
5,846286	5,240102	5,438987	5,332423	5,437844	7,312449	7,225448	7,461304	7,132327	7,248794	FALSK		14	+	CRVO_Control	4	8	3	1	316	0	4	5,08E-05	0,000639246	1,816935539	0,865839913	RDH12	Retinol dehydrogenase 12 [OS=Homo sapiens]	Q96NR8
5,835278	5,42766	5,123234	5,46423	5,464133	7,231638	7,295535	7,315112	7,323275	7,227325	FALSK		4	+	CRVO_Control	16	105	14	1	686	1	16	0,00014087	0,000998201	1,8156703	0,853461424	CRMP1	Isoform LCRMP-1 of Dihydropyrimidinase-related protein 1 [OS=Homo sapiens]	Q14194-2
5,582736	5,41013	5,12973	5,666913	5,57739	7,275464	7,312881	7,255377	7,298163	7,243763	FALSK		20	+	CRVO_Control	17	248	8	1	463	0	17	4,23E-05	0,000600994	1,803749847	0,861647276	EEF1A2	Elongation factor 1-alpha 2 [OS=Homo sapiens]	Q05639
5,794416	5,74685	4,827819	5,008989	5,789207	6,786596	7,398316	7,361066	7,126188	7,581954	FALSK		16	+	CRVO_Control	10	169	2	1	430	0	10	0,002081707	0,005604937	1,817367935	0,805545557	GOT2	Aspartate aminotransferase, mitochondrial [OS=Homo sapiens]	P00505
5,813012	5,320068	5,392215	5,375638	5,499824	7,27004	7,160094	7,39391	7,149644	7,384555	FALSK		17	+	CRVO_Control	9	24	8	1	1103	1	9	4,01E-05	0,000605814	1,79149704	0,856565147	GUCY2D	Retinal guanylyl cyclase 1 [OS=Homo sapiens]	Q02846
5,588897	5,592326	5,216599	5,473117	5,568201	7,185333	7,252613	7,34853	7,222503	7,357594	FALSK		10	+	CRVO_Control	3	9	3	1	298	0	3	4,33E-05	0,000598598	1,785486698	0,853099783	ATP5C1	ATP synthase subunit gamma, mitochondrial [OS=Homo sapiens]	P36542-1
5,701532	5,993054	4,854714	5,501214	5,15274	7,254009	7,324024	7,234834	7,2483	7,306061	FALSK		9	+	CRVO_Control	4	8	4	1	567	0	4	0,000677523	0,002510741	1,832794476	0,835991262	PGM5	phosphoglucomutase-like protein 5 [OS=Homo sapiens]	Q15124-1
5,250107	4,816525	5,619393	5,915703	5,645136	7,240309	7,270528	7,289787	7,247875	7,320405	FALSK		1	+	CRVO_Control	8	16	8	1	742	0	8	0,000640288	0,002420071	1,824408054	0,833558691	SV2A	Synaptic vesicle glycoprotein 2A [OS=Homo sapiens]	Q7L0J3
5,502925	5,330862	5,31404	5,647655	5,65634	7,355189	7,259734	7,250168	7,252515	7,249285	FALSK	Acetyl [N-Term]	20	+	CRVO_Control	23	93	19	1	1116	4	23	2,02E-05	0,000503773	1,783014011	0,858618073	SLC12A5	Isoform 2 of Solute carrier family 12 member 5 [OS=Homo sapiens]	Q9H2X9-2
5,369329	5,710822	5,046623	5,546983	5,731532	7,000071	7,476138	7,318412	7,12818	7,387997	FALSK		7	+	CRVO_Control	12	29	12	1	276	0	12	0,000146839	0,001017672	1,781101608	0,837645688	SCGN	secretagogin [OS=Sus scrofa]	Q06A97
5,640043	5,676474	4,983815	5,679177	5,397338	7,256413	7,30027	7,272667	7,253551	7,247874	FALSK		7	+	CRVO_Control	3	5	3	1	1331	0	3	0,000178972	0,001112267	1,790785408	0,839340307	CNTNAP2	Contactin-associated protein-like 2 [OS=Homo sapiens]	Q9UHC6-1
5,543599	5,252568	5,374834	5,580431	5,751409	7,159282	7,306912	7,361034	7,202334	7,311889	FALSK		15	+	CRVO_Control	7	23	7	1	395	0	7	7,08E-05	0,00071413	1,76772213	0,840086465	GNB5	Guanine nucleotide-binding protein subunit beta-5 [OS=Homo sapiens]	O14775
5,89914	5,348762	5,48029	5,261732	5,490566	7,38919	7,314146	7,235839	7,169857	7,22666	FALSK		4	+	CRVO_Control	18	50	11	1	854	7	18	2,82E-05	0,000534456	1,771040249	0,85033402	PDE6B	Rod cGMP-specific 3',5'-cyclic phosphodiesterase subunit beta [OS=Homo sapiens]	P35913
5,658209	5,551644	5,203368	5,627278	5,513953	7,25498	7,290426	7,268182	7,321563	7,200159	FALSK		1	+	CRVO_Control	12	19	11	1	727	1	12	2,62E-05	0,000524693	1,756171513	0,844098855	RAP1GAP	Isoform 4 of Rap1 GTPase-activating protein 1 [OS=Homo sapiens]	P47736-4
5,692092	5,526695	5,274261	5,485427	5,617651	6,859224	7,388017	7,407693	7,204571	7,398316	FALSK		9	+	CRVO_Control	2	2	2	1	462	0	2	0,00039344	0,00174448	1,732339001	0,802740291	DNAJB5	Isoform 3 of DnaJ homolog subfamily B member 5 [OS=Homo sapiens]	O75953-5
5,513345	5,476786	5,66104	5,604361	5,363616	6,877492	7,308785	7,812789	7,257327	6,847997	FALSK		8	+	CRVO_Control	4	9	2	1	1079	2	4	0,000253868	0,001297054	1,697048569	0,793615619	SLC4A4	Electrogenic sodium bicarbonate cotransporter 1 [OS=Sus scrofa]	Q4U116-1
5,823756	5,504589	5,247428	5,47155	5,537305	7,196032	7,342914	7,299091	7,170406	7,309249	FALSK		15	+	CRVO_Control	10	57	9	1	366	1	10	9,38E-05	0,00082353	1,74661274	0,827554728	IDH3A	Isocitrate dehydrogenase [NAD] subunit alpha, mitochondrial [OS=Homo sapiens]	P50213-1
5,686109	5,161077	5,534255	5,672248	5,538541	7,251171	7,333596	7,242649	7,255028	7,237632	FALSK		15	+	CRVO_Control	6	17	5	1	683	1	6	9,44E-05	0,000824287	1,745569229	0,827025404	SV2B	Synaptic vesicle glycoprotein 2B [OS=Homo sapiens]	Q7L1I2
5,656651	5,358174	5,448071	5,552005	5,630107	7,196999	7,211257	7,33445	7,224291	7,33829	FALSK		11	+	CRVO_Control	19	104	6	1	425	14	19	1,04E-05	0,00049302	1,732055378	0,839584525	SUCLA2	Succinate--CoA ligase [ADP-forming] subunit beta, mitochondrial [OS=Sus scrofa]	O97580
5,610195	5,213342	5,623608	5,554262	5,643368	7,16989	7,112691	7,34311	7,211086	7,448641	FALSK		12	+	CRVO_Control	6	82	4	1	340	0	6	7,90E-06	0,000475335	1,728128624	0,839447581	GNB3	Guanine nucleotide-binding protein G(I)/G(S)/G(T) subunit beta-3 [OS=Homo sapiens]	P16520
4,85368	5,498124	5,472634	5,916777	5,739158	7,18932	7,218721	7,259743	7,25591	7,366159	FALSK		1	+	CRVO_Control	2	2	2	1	231	0	2	0,000411079	0,001801619	1,761896229	0,814730941	SELRC1;COA7	Cytochrome c oxidase assembly factor 7 [OS=Homo sapiens]	Q96BR5
5,633335	5,58027	5,337714	5,65343	5,552051	7,182881	7,277054	7,231573	7,328179	7,258089	FALSK		1	+	CRVO_Control	7	18	5	1	495	2	7	6,53E-06	0,000467169	1,704195404	0,829234648	RGS7	regulator of G-protein signaling 7 [OS=Homo sapiens]	P49802-1
5,601123	5,588211	5,299854	5,597821	5,617253	7,216975	7,351744	7,269201	7,287313	7,142914	FALSK		2	+	CRVO_Control	3	8	3	1	140	0	3	2,21E-05	0,000514223	1,712776852	0,825321677	CEND1	Cell cycle exit and neuronal differentiation protein 1 [OS=Sus scrofa]	Q29026
5,699083	5,544745	5,200856	5,648722	5,51143	7,205597	7,30411	7,226255	7,305176	7,217799	FALSK		11	+	CRVO_Control	11	35	8	1	749	0	11	3,41E-05	0,000580137	1,730820274	0,830184307	DLG2	Isoform 3 of Disks large homolog 2 [OS=Homo sapiens]	Q15700-3
5,489927	5,398721	5,501154	5,636169	5,567544	7,212046	7,390102	7,157344	7,274862	7,182725	FALSK		1	+	CRVO_Control	3	4	3	1	539	0	3	1,52E-05	0,000484378	1,724712658	0,833598564	NTNG1	Netrin-G1 [OS=Homo sapiens]	Q9Y2I2-3
5,485197	5,44444	5,370038	5,838675	5,660513	7,218195	7,273762	7,243158	7,282081	7,241625	FALSK		4	+	CRVO_Control	10	73	10	1	303	0	10	2,93E-05	0,000549644	1,691991806	0,813526371	ATP1B1;LOC106510095	Sodium/potassium-transporting ATPase subunit beta-1 [OS=Sus scrofa]	P05027
5,738373	5,462295	5,239633	5,501871	5,781643	7,401871	7,094246	7,175342	7,205729	7,33799	FALSK		3	+	CRVO_Control	2	3	2	1	63	0	2	1,21E-05	0,000525392	1,698272705	0,822769504	COX17	cytochrome C oxidase copper chaperone [OS=Homo sapiens]	Q14061
5,245816	5,788676	5,175	5,822694	5,716667	7,249347	7,260579	7,256203	7,273724	7,210684	FALSK		2	+	CRVO_Control	9	20	8	1	737	0	9	0,000266214	0,001338482	1,700336456	0,794424662	PRKCE	Protein kinase C epsilon type [OS=Homo sapiens]	Q02156
5,66066	5,506103	5,388184	5,670854	5,643507	7,181355	7,273322	7,26864	7,246475	7,277457	FALSK		19	+	CRVO_Control	49	630	29	1	1026	26	49	1,40E-05	0,000485498	1,675588512	0,811184517	ATP1A3	Isoform 3 of Sodium/potassium-transporting ATPase subunit alpha-3 [OS=Homo sapiens]	P13637-3
5,771149	5,388874	5,362696	5,693694	5,62781	7,22342	7,29	7,331579	7,246266	7,150757	FALSK		20	+	CRVO_Control	11	45	8	1	298	0	11	9,30E-05	0,000818317	1,679560184	0,797476882	NAPB	Beta-soluble NSF attachment protein [OS=Homo sapiens]	Q9H115
5,776094	5,554429	5,300839	5,613507	5,614697	7,297744	7,309678	7,102694	7,257379	7,266811	FALSK		16	+	CRVO_Control	3	5	3	1	411	0	3	4,28E-06	0,000579927	1,674947548	0,817544053	KIAA0513	Uncharacterized protein KIAA0513 [OS=Homo sapiens]	O60268-1
5,601971	5,539783	5,305604	5,677034	5,652369	7,187174	7,270766	7,307372	7,281032	7,18464	FALSK		10	+	CRVO_Control	5	39	5	1	572	0	5	3,65E-05	0,000590797	1,690844536	0,81122865	DPYSL4	dihydropyrimidinase-related protein 4 [OS=Homo sapiens]	O14531
5,729229	5,650737	5,403903	5,562106	5,548275	7,212847	7,282129	7,341458	7,20799	7,191103	FALSK		20	+	CRVO_Control	10	38	10	1	385	0	10	2,28E-05	0,00051361	1,668255615	0,80441882	IDH3B	isocitrate dehydrogenase [NAD] subunit beta, mitochondrial [OS=Homo sapiens]	O43837-1
5,549838	5,629345	5,554037	5,585976	5,600973	7,246973	7,16489	7,511423	7,240788	7,032321	FALSK		15	+	CRVO_Control	9	61	9	1	137	0	9	4,86E-05	0,00063576	1,655245113	0,792460392	CRABP1	Cellular retinoic acid-binding protein 1 [OS=Homo sapiens]	P29762
5,496596	5,546279	5,19474	5,868746	5,704321	7,264349	7,217616	7,209697	7,132658	7,399223	FALSK		1	+	CRVO_Control	2	9	2	1	152	0	2	0,000155575	0,0010329	1,682571888	0,793255497	MGST3	Microsomal glutathione S-transferase 3 [OS=Homo sapiens]	O14880
5,766845	5,706407	5,392636	5,494164	5,53449	7,122775	7,295837	7,287231	7,177389	7,340509	FALSK		20	+	CRVO_Control	2	7	2	1	51	0	2	5,79E-05	0,00066479	1,665839863	0,795789279	ATP5E	ATP synthase subunit epsilon, mitochondrial [OS=Homo sapiens]	P56381
5,85889	5,444885	5,299212	5,722425	5,539039	7,200144	7,300421	7,292305	7,256894	7,182323	FALSK		11	+	CRVO_Control	3	9	3	1	210	0	3	0,000131037	0,000968347	1,673527241	0,791151675	NDUFS8	NADH dehydrogenase [ubiquinone] iron-sulfur protein 8, mitochondrial [OS=Homo sapiens]	O00217
5,656623	5,368053	5,331708	5,852133	5,662473	7,272396	7,217191	7,496132	7,316039	6,860466	FALSK		16	+	CRVO_Control	12	89	12	1	288	0	12	0,000550398	0,002175764	1,658246994	0,76595748	STX1B	Syntaxin-1B [OS=Homo sapiens]	P61266
5,691139	5,348423	5,326458	5,722047	5,611832	6,924212	7,315256	7,283056	7,326744	7,323256	FALSK		5	+	CRVO_Control	3	7	3	1	116	0	3	0,000231347	0,001245792	1,694525146	0,793714349	CARTPT	Cocaine- and amphetamine-regulated transcript protein [OS=Homo sapiens]	Q16568
5,504879	5,745892	5,563068	5,515651	5,62305	6,77084	7,429368	7,478305	7,187296	7,200273	FALSK		10	+	CRVO_Control	14	36	8	1	1010	0	14	0,000102767	0,000863837	1,622708416	0,770839424	OGDHL	2-oxoglutarate dehydrogenase-like, mitochondrial [OS=Homo sapiens]	Q9ULD0
5,684444	5,533381	5,214975	5,72715	5,685888	7,236455	7,255664	7,221324	7,243993	7,243462	FALSK		1	+	CRVO_Control	12	25	2	1	383	9	12	5,19E-05	0,000638851	1,671011734	0,799117757	ELAVL4	Isoform 3 of ELAV-like protein 4 [OS=Homo sapiens]	P26378-3
5,822674	5,506347	5,376767	5,734658	5,53369	7,258737	7,292768	7,255464	7,25351	7,142698	FALSK		2;CHR_HG2233_PATCH	+	CRVO_Control	2	16	2	1	429	0	2	3,69E-05	0,000595342	1,645808029	0,790378931	NDUFA10	Isoform 2 of NADH dehydrogenase [ubiquinone] 1 alpha subcomplex subunit 10, mitochondrial [OS=Homo sapiens]	O95299-2
5,817566	5,593255	5,409375	5,548437	5,650994	7,14618	7,242218	7,293701	7,184373	7,324631	FALSK		5	+	CRVO_Control	18	123	18	1	464	0	18	5,13E-05	0,000637543	1,634295177	0,782407206	CS	citrate synthase, mitochondrial [OS=Sus scrofa]	P00889
5,894241	5,642354	5,00634	5,810902	5,513745	7,193685	7,228786	7,265995	7,337295	7,163004	FALSK		MT	+	CRVO_Control	8	20	8	1	606	0	8	0,000484075	0,001983922	1,664236546	0,770431116	ND5	NADH-ubiquinone oxidoreductase chain 5 [OS=Sus scrofa]	Q9TDR1
5,878966	5,227505	5,245576	5,84535	5,719707	7,290921	7,165363	7,045891	7,352649	7,320549	FALSK	Acetyl [N-Term]	3	+	CRVO_Control	4	20	4	1	285	0	4	6,74E-05	0,000705561	1,651653957	0,787947173	SYNPR	Isoform 2 of Synaptoporin [OS=Homo sapiens]	Q8TBG9-2
5,747143	5,54997	5,369257	5,679446	5,687867	7,167917	7,239306	7,284827	7,216678	7,282135	FALSK			+	CRVO_Control	15	184	2	1	298	0	15	4,00E-05	0,000607282	1,631436062	0,783108447	SLC25A6	ADP/ATP translocase 3 [OS=Sus scrofa]	Q6QRN9
5,711177	5,530098	5,629498	5,601527	5,592587	7,182349	7,260629	7,289924	7,141292	7,30659	FALSK		1	+	CRVO_Control	12	238	6	1	340	8	12	5,63E-06	0,000485375	1,62317934	0,79155977	GNB1	Guanine nucleotide-binding protein G(I)/G(S)/G(T) subunit beta-1 [OS=Homo sapiens]	P62873
5,712461	5,38713	5,366847	5,831579	5,749285	7,218042	7,312879	7,522778	7,3219	6,668776	FALSK		12	+	CRVO_Control	19	99	14	1	422	5	19	0,001654698	0,004741467	1,599414635	0,723050094	SYT1	Synaptotagmin-1 [OS=Homo sapiens]	P21579
5,623088	5,404313	5,578231	5,768189	5,688128	7,231683	7,256617	7,191588	7,290163	7,201631	FALSK	Acetyl [N-Term]	22	+	CRVO_Control	3	15	3	1	233	0	3	1,21E-05	0,000521248	1,621946335	0,786868881	SYNGR1	Synaptogyrin-1 [OS=Homo sapiens]	O43759-1
5,79203	5,569853	5,534255	5,616013	5,609361	7,264907	7,25027	7,463099	7,213274	6,928358	FALSK		11	+	CRVO_Control	9	40	9	1	289	0	9	9,81E-05	0,000837337	1,599679279	0,760880693	STX3	Syntaxin-3 [OS=Homo sapiens]	Q13277-1
5,873872	5,844191	5,264735	5,510976	5,518808	7,281443	7,185335	7,133693	7,256459	7,299141	FALSK		16	+	CRVO_Control	2	4	2	1	795	0	2	0,000105801	0,000873835	1,628698158	0,773255349	SPG7	Paraplegin [OS=Homo sapiens]	Q9UQ90
5,411385	5,459119	5,496186	5,890899	5,811086	7,317551	7,407707	6,94401	6,958253	7,453975	FALSK		4	+	CRVO_Control	3	15	3	1	76	0	3	0,000583984	0,00226137	1,60256424	0,741292008	COX6C	Cytochrome c oxidase subunit 6C [OS=Sus scrofa]	A1XQT2
5,905065	5,419728	5,394367	5,83541	5,470458	7,406539	7,309933	7,133689	7,178625	7,096187	FALSK		11	+	CRVO_Control	4	8	2	1	354	0	4	6,74E-05	0,000704178	1,619988728	0,773513988	OPCML	Isoform 4 of Opioid-binding protein/cell adhesion molecule [OS=Homo sapiens]	Q14982-4
5,935437	5,551526	5,323945	5,662186	5,575381	7,163937	7,210297	7,2113	7,216626	7,345333	FALSK		9	+	CRVO_Control	3	5	3	1	377	0	3	0,000135138	0,000985206	1,619803619	0,766778032	PTGES2	Prostaglandin E synthase 2 [OS=Homo sapiens]	Q9H7Z7
5,690785	5,748117	5,186705	5,666127	5,79951	7,212256	7,336686	7,119402	7,184874	7,294614	FALSK		1	+	CRVO_Control	9	23	9	1	2273	0	9	3,92E-05	0,000602386	1,611317635	0,773987939	ABCA4	Retinal-specific ATP-binding cassette transporter [OS=Homo sapiens]	P78363
5,483469	5,634704	5,596147	5,68152	5,651482	7,171398	7,27005	7,368499	7,125741	7,193481	FALSK		7	+	CRVO_Control	3	8	3	1	613	0	3	9,20E-06	0,000484487	1,616369438	0,785790155	GPR37	Prosaposin receptor GPR37 [OS=Homo sapiens]	O15354
6,088797	5,403677	5,200989	5,691766	5,647729	7,231696	7,446256	6,799747	6,98692	7,550522	FALSK		15	+	CRVO_Control	3	11	3	1	150	0	3	0,000743877	0,0026781	1,596436691	0,735121513	COX5A	Cytochrome c oxidase subunit 5A, mitochondrial [OS=Homo sapiens]	P20674
5,730656	5,371408	5,306922	5,936637	5,736168	7,342568	7,365471	6,824668	6,940062	7,542058	FALSK		MT	+	CRVO_Control	2	3	2	1	514	0	2	0,00068935	0,002534749	1,586607265	0,732076147	COX1	Cytochrome c oxidase subunit 1 [OS=Sus scrofa]	O79876
5,623157	5,845545	5,29599	5,751493	5,502188	7,189248	7,233233	7,158238	7,105628	7,430992	FALSK		MT	+	CRVO_Control	2	6	2	1	226	0	2	0,000166782	0,00106983	1,61979351	0,764536832	ATP6	ATP synthase subunit A [OS=Sus scrofa]	Q35915
5,600461	5,903166	5,367799	5,510462	5,774738	7,238207	7,346489	7,195736	7,169925	7,184841	FALSK	Acetyl [N-Term]	X	+	CRVO_Control	8	26	8	1	328	0	8	3,14E-05	0,000559211	1,595714283	0,768416579	GPM6B	Isoform 4 of Neuronal membrane glycoprotein M6-b [OS=Homo sapiens]	Q13491-4
5,881938	5,460716	5,403186	5,72992	5,687986	7,167192	7,248472	7,248712	7,185752	7,282829	FALSK		19	+	CRVO_Control	9	99	5	1	220	3	9	0,000104693	0,000866574	1,593841934	0,757624598	RAB3A	Ras-related protein Rab-3A [OS=Homo sapiens]	P20336
5,692543	5,33205	5,558847	5,881938	5,683653	7,036086	7,232661	7,231099	7,272663	7,341836	FALSK		22	+	CRVO_Control	2	5	2	1	580	0	2	9,83E-05	0,000837786	1,593062687	0,757860255	SYN3	Synapsin-3 [OS=Homo sapiens]	O14994
5,424198	5,81765	5,504858	5,69284	5,752955	7,170415	7,201625	7,300934	7,162271	7,295398	FALSK		3	+	CRVO_Control	9	37	9	1	346	0	9	3,69E-05	0,00059303	1,587628365	0,763503044	SUCLG1	Succinate--CoA ligase [ADP/GDP-forming] subunit alpha, mitochondrial [OS=Sus scrofa]	O19069-2
5,622218	5,525784	5,715947	5,497177	5,81746	7,005282	7,218255	7,574015	7,006735	7,250937	FALSK		17	+	CRVO_Control	6	15	6	1	567	0	6	5,74E-05	0,000661098	1,575327587	0,75444706	DGKE	Diacylglycerol kinase epsilon [OS=Homo sapiens]	P52429
5,997502	5,591858	5,349574	5,571692	5,558887	7,191742	7,165238	7,351814	7,170702	7,22981	FALSK		7	+	CRVO_Control	5	8	5	1	5142	0	5	0,000236891	0,00127023	1,607959175	0,755330966	PCLO	Isoform 5 of Protein piccolo [OS=Homo sapiens]	Q9Y6V0-5
6,000704	5,462295	5,364657	5,286729	5,948853	7,221941	6,760763	7,10916	7,508451	7,400496	FALSK	Acetyl [N-Term]	6	+	CRVO_Control	2	6	2	1	68	0	2	0,000953085	0,003125558	1,587514687	0,727525003	MT-III	Metallothionein-3 [OS=Sus scrofa]	P55944
5,649329	5,872575	5,065858	5,878908	5,649475	7,16427	7,328644	7,233548	7,260052	7,136449	FALSK		17	+	CRVO_Control	5	16	2	1	776	3	5	0,000365367	0,001660798	1,601363754	0,747137182	MAPT	Isoform Tau-G of Microtubule-associated protein tau [OS=Homo sapiens]	P10636-9
5,70861	5,539129	5,549624	5,74091	5,700355	7,205769	7,172839	7,183387	7,334177	7,224526	FALSK		1	+	CRVO_Control	4	14	4	1	706	0	4	6,10E-07	0,000385515	1,576413918	0,777260844	SLC6A9	Sodium- and chloride-dependent glycine transporter 1 [OS=Homo sapiens]	P48067-1
5,663004	5,328239	5,46922	5,803628	5,928246	7,246616	7,218997	7,191553	7,254519	7,210718	FALSK		1	+	CRVO_Control	5	8	5	1	4975	0	5	0,000113327	0,000898793	1,586013031	0,75333526	RYR2	Isoform 2 of Ryanodine receptor 2 [OS=Homo sapiens]	Q92736-2
5,976079	5,687655	5,177648	5,725185	5,609015	7,194748	7,260177	7,248824	7,332252	7,071955	FALSK		10	+	CRVO_Control	9	28	9	1	376	0	9	0,000335632	0,001559289	1,586474419	0,741709968	PHYHIPL	Phytanoyl-CoA hydroxylase-interacting protein-like [OS=Homo sapiens]	Q96FC7
5,769502	5,614683	5,449557	5,764193	5,672422	7,202587	7,278448	7,206505	7,231208	7,198625	FALSK		2;CHR_HSCHR2_6_CTG7_2	+	CRVO_Control	16	75	16	1	741	0	16	1,38E-05	0,000487929	1,569403076	0,761387466	NDUFS1	Isoform 2 of NADH-ubiquinone oxidoreductase 75 kDa subunit, mitochondrial [OS=Homo sapiens]	P28331-2
5,730064	5,737233	5,44571	5,661815	5,710101	7,143113	7,327776	7,301015	7,159271	7,17276	FALSK		5	+	CRVO_Control	31	223	31	1	781	0	31	3,73E-05	0,000589937	1,563802433	0,752393401	ACO2	Aconitate hydratase, mitochondrial [OS=Sus scrofa]	P16276
5,782622	5,765934	5,364419	5,666762	5,721804	7,158357	7,274116	7,300704	7,169757	7,190691	FALSK		1	+	CRVO_Control	3	28	3	1	256	0	3	8,92E-05	0,000797924	1,558416462	0,743020068	ATP5F1	ATP synthase F(0) complex subunit B1, mitochondrial [OS=Homo sapiens]	P24539
5,83531	5,787803	5,315825	5,689028	5,654215	7,23192	7,531364	7,199576	7,383026	6,574891	FALSK		21	+	CRVO_Control	2	12	2	1	62	0	2	0,000873348	0,00294823	1,527719307	0,703605485	PCP4	Purkinje cell protein 4 [OS=Homo sapiens]	P48539
5,824031	5,539262	5,23364	5,976949	5,643914	7,214287	7,24213	7,203013	7,257703	7,178954	FALSK		10	+	CRVO_Control	3	6	3	1	128	0	3	0,000202547	0,001172299	1,575658321	0,742785898	LOC733605;NDUFB6	NADH dehydrogenase [ubiquinone] 1 beta subcomplex subunit 6 [OS=Sus scrofa]	Q29259
5,929177	5,642406	5,615365	5,514119	5,633633	7,150734	7,216041	7,279792	7,114134	7,319489	FALSK		17	+	CRVO_Control	5	22	5	1	240	0	5	5,18E-05	0,000640267	1,549097824	0,74318494	UNC119	protein unc-119 homolog A [OS=Homo sapiens]	Q13432
5,74823	5,723836	5,403275	5,827784	5,620157	7,19725	7,259161	7,25896	7,256489	7,109023	FALSK		8	+	CRVO_Control	13	31	13	1	874	0	13	3,81E-05	0,000593882	1,551520348	0,74657055	OXR1	Oxidation resistance protein 1 [OS=Homo sapiens]	Q8N573-1
5,847292	5,822728	5,24388	5,756217	5,649512	7,181242	7,200944	7,246933	7,371975	7,062788	FALSK		22	+	CRVO_Control	11	40	9	1	369	2	11	0,000231712	0,001245986	1,548850632	0,729426749	sep-05	Septin-5 [OS=Homo sapiens]	Q99719-1
5,669455	5,546002	5,613609	5,841984	5,57909	7,092922	7,175418	7,257881	7,277715	7,243714	FALSK		3	+	CRVO_Control	4	9	3	1	582	0	4	8,16E-06	0,000483408	1,559502125	0,759487334	SYN2	Synapsin-2 [OS=Homo sapiens]	Q92777-1
5,790273	5,557236	5,396143	5,848297	5,729367	7,215881	7,269435	7,228469	7,224396	7,13397	FALSK		19	+	CRVO_Control	3	15	3	1	113	0	3	7,58E-05	0,000734952	1,550167179	0,740653955	NDUFA7	NADH dehydrogenase [ubiquinone] 1 alpha subcomplex subunit 7 [OS=Homo sapiens]	O95182
5,798265	5,456089	5,514105	5,712818	5,893115	7,205464	7,172893	7,219161	7,302867	7,16839	FALSK		22	+	CRVO_Control	6	12	6	1	358	0	6	5,79E-05	0,000663563	1,53887682	0,737634848	sep-03	Neuronal-specific septin-3 [OS=Homo sapiens]	Q9UH03-1
4,972576	6,187574	5,186954	5,664158	6,033255	7,265182	7,404223	6,994905	6,936015	7,39958	FALSK		12	+	CRVO_Control	2	4	2	1	346	0	2	0,001456207	0,004302792	1,591077805	0,721925926	TSFM	Isoform 2 of Elongation factor Ts, mitochondrial [OS=Homo sapiens]	P43897-2
5,99848	5,693405	5,309238	5,646667	5,699035	7,155787	7,218836	7,316498	7,320478	7,036371	FALSK		17	+	CRVO_Control	10	35	7	1	493	0	10	0,000451848	0,001896961	1,540229034	0,717855371	sep-04	Isoform 4 of Septin-4 [OS=Homo sapiens]	O43236-4
5,446119	5,714151	5,707488	5,783445	5,776279	7,234098	7,218095	7,227824	7,216831	7,1638	FALSK		15	+	CRVO_Control	2	21	2	1	243	0	2	2,56E-05	0,000521287	1,526633072	0,737643841	SCAMP5	Isoform 2 of Secretory carrier-associated membrane protein 5 [OS=Homo sapiens]	Q8TAC9-2
6,04585	5,757517	5,279641	5,630812	5,649475	7,269543	7,223929	7,200163	7,244567	7,114173	FALSK			+	CRVO_Control	28	78	26	1	2805	0	28	0,000176638	0,001105006	1,537816048	0,727336076		Isoform 2 of Microtubule-associated protein 1A [OS=Homo sapiens]	P78559-2
5,526772	5,723603	5,330533	5,799887	5,803688	7,21463	7,243256	7,05091	7,18134	7,312585	FALSK		1	+	CRVO_Control	3	4	3	1	379	0	3	1,52E-05	0,000486768	1,563647461	0,758132817	KCNJ10	ATP-sensitive inward rectifier potassium channel 10 [OS=Homo sapiens]	P78508
5,359523	5,685562	5,611687	6,039206	5,470986	7,184893	7,372123	7,118343	7,093807	7,222128	FALSK		6;CHR_HSCHR6_MHC_APD_CTG1;CHR_HSCHR6_MHC_COX_CTG1;CHR_HSCHR6_MHC_DBB_CTG1;CHR_HSCHR6_MHC_MCF_CTG1;CHR_HSCHR6_MHC_QBL_CTG1	+	CRVO_Control	3	3	3	1	961	0	3	0,000345242	0,00159223	1,564866066	0,731914461	GABBR1	gamma-aminobutyric acid type B receptor subunit 1 [OS=Homo sapiens]	Q9UBS5-1
5,760022	5,604349	5,540189	5,810962	5,770826	7,142617	7,225929	7,290467	7,207462	7,174923	FALSK		17;CHR_HSCHR17_1_CTG5;CHR_HSCHR17_2_CTG5	+	CRVO_Control	29	177	28	1	744	1	29	3,46E-05	0,000572475	1,51101017	0,728431761	NSF	Vesicle-fusing ATPase [OS=Homo sapiens]	P46459
5,984409	5,707179	5,320027	5,644303	5,768585	7,167841	7,237271	7,299103	7,168855	7,15098	FALSK		9	+	CRVO_Control	5	11	5	1	339	0	5	0,000315083	0,001481987	1,519909477	0,713246264	AUH	methylglutaconyl-CoA hydratase, mitochondrial [OS=Homo sapiens]	Q13825
6,345144	6,13536	5,003934	5,369257	5,17783	7,194137	7,189174	7,057333	7,358769	7,218824	FALSK		11	+	CRVO_Control	3	9	3	1	75	0	3	0,003865294	0,008875427	1,597342491	0,704948152	GNG3	Guanine nucleotide-binding protein G(I)/G(S)/G(O) subunit gamma-3 [OS=Homo sapiens]	P63215
5,850497	5,682811	5,367799	5,80186	5,786445	7,125152	7,355348	7,192608	7,069085	7,272397	FALSK		2	+	CRVO_Control	3	10	3	1	114	0	3	0,000163014	0,00105279	1,5050354	0,713417396	COX7A2L	Cytochrome c oxidase subunit 7A-related protein, mitochondrial [OS=Homo sapiens]	O14548
5,878161	5,559727	5,449659	5,714975	5,822291	7,155806	7,288553	7,245669	7,094608	7,22995	FALSK		19	+	CRVO_Control	2	15	2	1	86	0	2	0,000121838	0,000934998	1,517954731	0,721917221	COX6B1	Cytochrome c oxidase subunit 6B1 [OS=Homo sapiens]	P14854
5,823531	5,664966	5,466226	5,792162	5,762254	7,171526	7,289989	7,19453	7,090611	7,275397	FALSK		1	+	CRVO_Control	7	29	7	1	380	0	7	5,00E-05	0,000642585	1,502582932	0,72200553	ACOT7	cytosolic acyl coenzyme A thioester hydrolase [OS=Homo sapiens]	O00154
5,596196	5,747365	5,418499	5,916445	5,679532	6,954362	7,111521	7,386822	7,240768	7,278708	FALSK		7	+	CRVO_Control	2	2	2	1	348	0	2	0,000234306	0,00125815	1,522829056	0,717755935	OPN1SW	Short-wave-sensitive opsin 1 [OS=Homo sapiens]	P03999
5,820123	5,72928	5,580219	5,661815	5,767941	7,112176	7,24838	7,207986	7,122967	7,318717	FALSK		1	+	CRVO_Control	32	448	32	1	553	0	32	1,22E-05	0,000512336	1,490169525	0,7246628	ATP5A1	ATP synthase subunit alpha, mitochondrial [OS=Sus scrofa]	P80021
5,224703	5,491988	5,742899	5,698853	6,116138	7,201698	7,119891	7,250734	7,26298	7,160393	FALSK		4	+	CRVO_Control	14	139	2	1	298	0	14	0,000493498	0,002018177	1,544222832	0,718467462	SLC25A4	ADP/ATP translocase 1 [OS=Homo sapiens]	P12235
5,670618	5,650817	5,636253	5,706034	5,873782	7,302718	7,181381	7,226313	7,163519	7,136451	FALSK		3	+	CRVO_Control	7	32	7	1	359	0	7	2,12E-05	0,000518214	1,494575691	0,723767973	PDHB	Pyruvate dehydrogenase E1 component subunit beta, mitochondrial [OS=Homo sapiens]	P11177
5,816093	5,607997	5,486475	5,626702	5,985763	7,184185	7,049053	7,226354	7,186205	7,354609	FALSK		9	+	CRVO_Control	2	5	2	1	176	0	2	2,90E-05	0,000546892	1,495475006	0,722320554	ISCA1	Isoform 2 of Iron-sulfur cluster assembly 1 homolog, mitochondrial [OS=Homo sapiens]	Q9BUE6-2
6,13536	5,513579	5,388233	5,621349	5,698538	7,214716	7,221286	7,148252	7,176348	7,247238	FALSK		1	+	CRVO_Control	9	35	2	1	191	0	9	0,000218743	0,001224894	1,53015604	0,721733298	CDC42	Isoform 1 of Cell division control protein 42 homolog [OS=Homo sapiens]	P60953-1
5,885522	5,676573	5,563194	5,684659	5,749928	7,06861	7,24455	7,21489	7,188624	7,287437	FALSK	Acetyl [N-Term]	10	+	CRVO_Control	22	290	18	1	917	5	22	4,97E-05	0,000643408	1,488847065	0,715698864	HK1	Hexokinase-1 [OS=Homo sapiens]	P19367-1
5,756044	5,462336	5,738373	5,734943	5,866776	7,13636	7,244101	7,1796	7,136172	7,309666	FALSK		X	+	CRVO_Control	16	155	4	1	298	12	16	3,60E-05	0,000588827	1,489485264	0,718156926	SLC25A5	ADP/ATP translocase 2 [OS=Homo sapiens]	P05141
5,857876	5,705935	5,46703	5,798375	5,751655	7,190811	7,259253	7,167285	7,228803	7,157817	FALSK		11	+	CRVO_Control	11	41	11	1	464	0	11	2,12E-05	0,00052107	1,484619713	0,719102941	NDUFV1	NADH dehydrogenase [ubiquinone] flavoprotein 1, mitochondrial [OS=Homo sapiens]	P49821
5,747038	5,769434	5,687655	5,647023	5,753104	7,198155	7,226394	7,262858	7,224192	7,083251	FALSK		17	+	CRVO_Control	18	194	13	1	364	5	18	5,59E-06	0,000516753	1,478119183	0,722445574	ALDOC	Fructose-bisphosphate aldolase C [OS=Homo sapiens]	P09972
5,873996	5,584809	5,574385	5,857946	5,710117	7,170923	7,192785	7,170422	7,242221	7,224958	FALSK		9	+	CRVO_Control	33	184	2	1	864	29	33	1,68E-05	0,000493955	1,480011177	0,718201467	DNM1	Dynamin-1 [OS=Homo sapiens]	Q05193-1
5,856846	5,63208	5,256044	5,927239	5,848149	7,132019	7,299995	7,089299	7,104407	7,353069	FALSK		2	+	CRVO_Control	17	280	16	1	283	1	17	0,000250219	0,001299427	1,491686153	0,703233523	VDAC1	voltage-dependent anion-selective channel protein 1 [OS=Sus scrofa]	Q9MZ16
5,811186	5,629062	5,726327	5,794332	5,659638	7,114774	7,235047	7,276589	7,170923	7,198482	FALSK		16	+	CRVO_Control	16	109	14	1	354	2	16	1,36E-05	0,000497522	1,475054169	0,71694022	GNAO1	Guanine nucleotide-binding protein G(O) subunit alpha [OS=Homo sapiens]	P09471-1
5,385068	5,62986	5,765323	5,911349	5,781021	7,180798	7,27013	7,173419	7,190466	7,167794	FALSK		9	+	CRVO_Control	2	17	2	1	172	0	2	9,01E-05	0,000798382	1,501997185	0,717245368	NDUFA8	NADH dehydrogenase [ubiquinone] 1 alpha subcomplex subunit 8 [OS=Homo sapiens]	P51970
5,830497	5,672414	5,701847	5,802833	5,609875	7,212216	7,160365	7,234577	7,16223	7,224657	FALSK		1	+	CRVO_Control	2	3	2	1	127	0	2	6,40E-06	0,000485037	1,475315762	0,72054879	MPC2	Mitochondrial pyruvate carrier 2 [OS=Homo sapiens]	O95563
5,963241	5,564364	5,406458	5,759862	5,807318	7,174455	7,19035	7,252593	7,241657	7,124317	FALSK		18	+	CRVO_Control	4	7	4	1	486	0	4	0,000184237	0,0011229	1,496425724	0,708388747	CELF4	CUGBP Elav-like family member 4 [OS=Homo sapiens]	Q9BZC1-1
5,818833	5,653122	5,579248	5,801961	5,773669	7,194194	7,222146	7,167225	7,212665	7,19721	FALSK		18	+	CRVO_Control	10	47	10	1	249	0	10	4,64E-06	0,000475674	1,473321152	0,720887233	NDUFV2	NADH dehydrogenase [ubiquinone] flavoprotein 2, mitochondrial [OS=Homo sapiens]	P19404
6,148922	5,639137	5,425875	5,760618	5,562144	7,227764	7,211106	7,067213	7,257643	7,220476	FALSK			+	CRVO_Control	4	26	4	1	222	0	4	0,000151889	0,001020945	1,489500999	0,707080816		Isoform 2 of NADH dehydrogenase [ubiquinone] 1 alpha subcomplex subunit 13 [OS=Homo sapiens]	Q9P0J0-2
6,063829	5,770285	5,367101	5,569449	5,659949	7,198163	7,15831	7,214252	7,197976	7,203998	FALSK		22	+	CRVO_Control	5	19	4	1	284	0	5	0,000225626	0,00123784	1,50841713	0,711737026	NIPSNAP1	Protein NipSnap homolog 1 [OS=Homo sapiens]	Q9BPW8
6,042192	5,749332	5,281579	5,766811	5,714243	7,205528	7,279843	7,163898	7,192288	7,14822	FALSK		4	+	CRVO_Control	13	30	13	1	620	0	13	0,000214023	0,001210989	1,487124157	0,702770704	RUFY3	Isoform 3 of Protein RUFY3 [OS=Homo sapiens]	Q7L099-3
5,759739	5,804185	5,620801	5,786445	5,680862	7,092212	7,338955	7,237921	7,1287	7,17938	FALSK		21	+	CRVO_Control	19	47	19	1	1573	0	19	1,23E-05	0,000506937	1,465027237	0,712710807	SYNJ1	Synaptojanin-1 [OS=Homo sapiens]	O43426
5,778444	5,668019	5,708475	5,808628	5,697339	7,044379	7,23073	7,357956	7,203485	7,133347	FALSK	Acetyl [N-Term]	14	+	CRVO_Control	22	141	22	1	413	0	22	2,56E-05	0,000519303	1,461798382	0,707318225	GOT1	Aspartate aminotransferase, cytoplasmic [OS=Sus scrofa]	P00503
4,715436	5,955053	5,791285	5,881347	5,984105	7,199447	7,208371	7,222343	7,121902	7,230741	FALSK		7	+	CRVO_Control	4	15	4	1	336	0	4	0,003139886	0,007533739	1,531115723	0,683262742	HIBADH	3-hydroxyisobutyrate dehydrogenase, mitochondrial [OS=Homo sapiens]	P31937
6,050832	5,973709	5,239284	5,570504	5,701101	7,300122	7,315105	7,097501	7,088436	7,16457	FALSK		3	+	CRVO_Control	10	54	9	1	199	0	10	0,000140226	0,001001126	1,48606081	0,706246658	TAGLN3	Transgelin-3 [OS=Homo sapiens]	Q9UI15
5,849144	5,635031	5,636	5,695708	5,803168	7,136727	7,212158	7,309458	7,185982	7,119629	FALSK		6	+	CRVO_Control	12	58	11	1	444	1	12	3,84E-05	0,000596799	1,468980885	0,708213984	PACSIN1	Protein kinase C and casein kinase substrate in neurons protein 1 [OS=Homo sapiens]	Q9BY11
5,720912	5,729616	5,590063	5,769405	5,866236	7,090084	7,256108	7,236398	7,132852	7,254071	FALSK		13	+	CRVO_Control	8	39	8	1	76	0	8	1,26E-05	0,000507301	1,45865612	0,70958787	LOC100622245;ATP5J	ATP synthase-coupling factor 6, mitochondrial [OS=Sus scrofa]	P13618
5,917528	5,615346	5,639895	5,773871	5,742854	7,156782	7,244293	7,175613	7,195168	7,194245	FALSK		1	+	CRVO_Control	7	34	7	1	463	0	7	2,35E-05	0,000525036	1,455321407	0,704760382	NDUFS2	NADH dehydrogenase [ubiquinone] iron-sulfur protein 2, mitochondrial [OS=Homo sapiens]	O75306-1
5,944778	5,625327	5,557508	5,666712	5,843933	7,143876	7,120885	7,223979	7,055985	7,394017	FALSK		X	+	CRVO_Control	10	44	10	1	613	0	10	5,06E-05	0,000639945	1,460096741	0,702279216	AIFM1	Apoptosis-inducing factor 1, mitochondrial [OS=Homo sapiens]	O95831-1
5,853803	5,957194	5,534066	5,619978	5,682013	7,231663	7,261591	7,138902	7,194698	7,136394	FALSK		16	+	CRVO_Control	2	3	2	1	747	0	2	1,37E-05	0,000490615	1,463238716	0,711331352	MTSS1L	MTSS1-like protein [OS=Homo sapiens]	Q765P7
5,86894	5,770829	5,516643	5,733303	5,802696	7,105288	7,244952	7,196481	7,134801	7,278336	FALSK		12	+	CRVO_Control	23	335	23	1	529	0	23	3,44E-05	0,00057219	1,453489113	0,701688765	ATP5B	ATP synthase subunit beta, mitochondrial [OS=Homo sapiens]	P06576
5,846852	5,488507	5,664909	5,81746	5,676573	7,165539	7,234497	7,089964	7,158748	7,268581	FALSK		15	+	CRVO_Control	4	7	2	1	473	0	4	5,23E-05	0,000639914	1,484605217	0,713382844	GABRB3	Gamma-aminobutyric acid receptor subunit beta-3 [OS=Homo sapiens]	P28472-1
5,924554	5,671251	5,618868	5,765837	5,731353	7,199681	7,201271	7,130486	7,193226	7,229472	FALSK		11	+	CRVO_Control	5	24	5	1	264	0	5	6,43E-06	0,000478115	1,448454762	0,707706688	NDUFS3	NADH dehydrogenase [ubiquinone] iron-sulfur protein 3, mitochondrial [OS=Homo sapiens]	O75489
5,807857	5,769434	5,609953	5,930736	5,639312	7,188304	7,181329	7,248851	7,204063	7,119979	FALSK		12	+	CRVO_Control	14	33	14	1	1018	0	14	1,87E-05	0,000501963	1,437047005	0,697414943	CNTN1	Contactin-1 [OS=Homo sapiens]	Q12860
5,800769	5,623774	5,667279	5,962707	5,687986	7,263289	7,244128	7,155239	7,082532	7,189414	FALSK			+	CRVO_Control	3	4	3	1	318	0	3	6,87E-05	0,000713414	1,438417435	0,690171483		NADH-ubiquinone oxidoreductase chain 1 [OS=Sus scrofa]	O79874
5,936453	5,861472	5,576763	5,409327	5,919877	7,221537	7,098524	7,198871	7,068336	7,336018	FALSK		16;CHR_HSCHR16_1_CTG1	+	CRVO_Control	23	76	8	1	1972	0	23	7,27E-05	0,000719287	1,44387846	0,692283073	MYH11	Myosin-11 [OS=Homo sapiens]	P35749
6,018509	5,652461	5,461367	5,790299	5,809599	7,211888	7,18285	7,262075	7,172425	7,107922	FALSK		10	+	CRVO_Control	23	69	23	1	675	0	23	0,000166277	0,001068403	1,440985203	0,684397552	HSPA12A	Heat shock 70 kDa protein 12A [OS=Homo sapiens]	O43301
5,889859	5,556923	5,673683	5,758559	5,886702	7,077347	7,229665	7,182154	7,058354	7,370656	FALSK		11	+	CRVO_Control	8	31	8	1	323	0	8	7,23E-05	0,000721565	1,430489922	0,68615834	SLC25A22	Mitochondrial glutamate carrier 1 [OS=Homo sapiens]	Q9H936
5,898133	5,70857	5,661899	5,804444	5,701533	7,071719	7,417997	7,281195	7,074124	7,056769	FALSK		14	+	CRVO_Control	4	5	4	1	641	0	4	0,000156084	0,001027282	1,425445175	0,677919399	CHAT	Choline O-acetyltransferase [OS=Sus scrofa]	P13222
5,936557	5,660048	5,375345	5,899262	5,864946	7,196577	7,359272	6,872087	6,981524	7,444077	FALSK		3	+	CRVO_Control	3	50	3	1	129	0	3	0,000217145	0,00122136	1,423475552	0,674144136	COX5B	Cytochrome c oxidase subunit 5B, mitochondrial [OS=Sus scrofa]	Q5S3G4
5,782665	5,734719	5,618868	5,853552	5,799268	7,018973	7,315192	7,259268	7,165859	7,155827	FALSK		16	+	CRVO_Control	5	20	5	1	453	0	5	5,44E-05	0,000652569	1,425209236	0,685658435	UQCRC2	Cytochrome b-c1 complex subunit 2, mitochondrial [OS=Homo sapiens]	P22695
5,878257	5,753551	5,48178	5,82092	5,822823	7,171615	7,141128	7,190736	7,358453	7,052791	FALSK		4	+	CRVO_Control	36	370	17	1	1020	0	36	7,83E-05	0,000738407	1,431478596	0,686047172	ATP1A2	Sodium/potassium-transporting ATPase subunit alpha-2 [OS=Sus scrofa]	D2WKD8
6,033673	5,697566	5,577678	5,564194	5,846437	7,131825	7,258515	7,292223	6,834157	7,349973	FALSK		6	+	CRVO_Control	4	12	4	1	548	0	4	0,000197878	0,00116303	1,429429245	0,677655595	ALDH5A1	Isoform 2 of Succinate-semialdehyde dehydrogenase, mitochondrial [OS=Homo sapiens]	P51649-2
5,733355	5,69488	5,551516	5,90689	5,911692	7,170927	7,158862	7,40429	7,22978	6,923625	FALSK		1	+	CRVO_Control	2	2	2	1	647	0	2	0,000467099	0,001937389	1,417830181	0,664033688	ADCK3	Atypical kinase COQ8A, mitochondrial [OS=Homo sapiens]	Q8NI60-1
5,764286	5,483613	5,644773	5,944828	5,899236	7,167719	7,182239	7,30052	7,108614	7,152923	FALSK		11	+	CRVO_Control	3	6	3	1	334	0	3	0,000173704	0,001097521	1,435055637	0,681341616	ELMOD1	ELMO domain-containing protein 1 [OS=Homo sapiens]	Q8N336
5,834985	5,690936	5,731864	5,679683	5,870845	7,23248	7,140988	7,277655	7,129693	7,131094	FALSK		2	+	CRVO_Control	9	44	9	1	198	0	9	6,97E-06	0,000480081	1,420719528	0,694145289	LOC100513720;GUK1	guanylate kinase [OS=Sus scrofa]	P31006
5,743799	5,738386	5,66783	5,829552	5,84269	7,111903	7,196904	7,142313	7,238896	7,218145	FALSK		14	+	CRVO_Control	14	23	11	1	1643	3	14	3,14E-07	0,000397422	1,417181015	0,701070985	NRXN3	Neurexin-3 [OS=Homo sapiens]	Q9Y4C0
4,662585	6,103873	5,683303	5,954324	6,026294	7,088173	7,232477	7,215528	7,149687	7,221216	FALSK		17	+	CRVO_Control	2	17	2	1	161	0	2	0,003540789	0,008285882	1,495340443	0,666655351	ATP5H	ATP synthase subunit d, mitochondrial [OS=Homo sapiens]	O75947-1
5,933093	5,765291	5,617352	5,740011	5,792622	7,025131	7,183385	7,289021	7,142087	7,258195	FALSK		2	+	CRVO_Control	24	97	18	1	678	6	24	0,000110127	0,000886397	1,409889889	0,673638198	SLC25A12	Calcium-binding mitochondrial carrier protein Aralar1 [OS=Homo sapiens]	O75746
5,931241	5,571085	5,714175	5,941363	5,673473	7,208872	7,009954	7,289409	7,071998	7,301786	FALSK		12	+	CRVO_Control	3	6	3	1	487	0	3	0,00010827	0,000884593	1,410136509	0,673879648	SLC38A1	Sodium-coupled neutral amino acid transporter 1 [OS=Homo sapiens]	Q9H2H9
5,920914	5,698939	5,629513	5,743023	5,862189	7,153163	7,208786	7,218075	7,122462	7,196189	FALSK		11	+	CRVO_Control	8	26	8	1	647	0	8	2,41E-05	0,00051696	1,40881958	0,682797321	DLAT	Dihydrolipoyllysine-residue acetyltransferase component of pyruvate dehydrogenase complex, mitochondrial [OS=Homo sapiens]	P10515
5,659938	5,861259	5,56206	5,905575	5,888731	7,124634	7,21965	7,105716	7,201607	7,240768	FALSK		2	+	CRVO_Control	9	24	8	1	322	1	9	6,04E-06	0,000486937	1,402962589	0,686210318	SFXN1	Sideroflexin-1 [OS=Sus scrofa]	A5A761
6,033973	5,961143	5,508411	5,711421	5,618007	7,263668	7,154778	7,138312	7,243784	7,073149	FALSK		3	+	CRVO_Control	3	3	3	1	208	0	3	7,79E-05	0,000738725	1,408146954	0,675353701	MRAS	Ras-related protein M-Ras [OS=Homo sapiens]	O14807-1
6,029963	5,758712	5,518025	5,748814	5,811186	7,144115	7,226277	7,246427	7,15843	7,11267	FALSK		8	+	CRVO_Control	2	3	2	1	325	0	2	0,000154894	0,001033808	1,404243946	0,668384387	ZC2HC1A	Zinc finger C2HC domain-containing protein 1A [OS=Homo sapiens]	Q96GY0
6,161882	5,861916	5,342777	5,689201	5,74528	7,198327	7,249949	7,002224	7,091171	7,32774	FALSK		3	+	CRVO_Control	3	9	3	1	632	0	3	0,000194543	0,001154165	1,413670731	0,670716955	SLC6A11	Sodium- and chloride-dependent GABA transporter 3 [OS=Homo sapiens]	P48066
5,332779	5,671082	5,219604	6,421375	5,941169	6,571309	6,871947	6,780453	7,927099	7,304693	FALSK		6	+	CRVO_Control	11	29	11	1	579	0	11	4,19E-05	0,000609214	1,373898697	0,663412115	FAAH	Fatty-acid amide hydrolase 1 [OS=Sus scrofa]	Q9TUI8
6,102765	5,546795	5,761546	5,745501	5,731854	7,242221	6,96077	7,360586	7,209445	7,077783	FALSK		15	+	CRVO_Control	10	26	10	1	772	0	10	5,12E-05	0,00064092	1,392468834	0,670862794	PLCD4	1-phosphatidylinositol 4,5-bisphosphate phosphodiesterase delta-4 [OS=Sus scrofa]	Q8SPR7
5,95164	5,80274	5,659633	5,768488	5,667988	7,153679	7,23335	7,156583	7,15206	7,180062	FALSK		19	+	CRVO_Control	4	18	4	1	213	0	4	1,47E-05	0,000486185	1,405049133	0,683462838	NDUFS7	NADH dehydrogenase [ubiquinone] iron-sulfur protein 7, mitochondrial [OS=Homo sapiens]	O75251
6,149239	5,74259	5,255259	5,768146	5,88835	7,124416	7,123603	7,196106	7,288486	7,141059	FALSK		8	+	CRVO_Control	11	40	10	1	261	0	11	0,000893264	0,002988846	1,414017391	0,654801615	CALB1	Calbindin [OS=Homo sapiens]	P05937
5,918551	5,934847	5,478348	5,69456	5,858958	7,130846	7,193123	7,139334	7,26227	7,146101	FALSK		14	+	CRVO_Control	2	21	2	1	71	0	2	0,00010326	0,000862248	1,397281837	0,668355885	GNG2	Guanine nucleotide-binding protein G(I)/G(S)/G(O) subunit gamma-2 [OS=Homo sapiens]	P59768
6,145268	5,383885	5,521254	5,638824	5,670342	7,249349	6,993614	7,254776	7,134058	7,172892	FALSK		1	+	CRVO_Control	4	5	2	1	470	2	4	0,000146462	0,001018784	1,489022827	0,707194557	ESRRG	Isoform 5 of Estrogen-related receptor gamma [OS=Homo sapiens]	P62508-5
5,956561	5,505138	5,805062	5,778522	5,821836	7,254521	7,245298	7,134047	7,017736	7,205729	FALSK		5	+	CRVO_Control	17	47	10	1	860	0	17	9,46E-05	0,000824007	1,398042774	0,669345142	PDE6A	Rod cGMP-specific 3',5'-cyclic phosphodiesterase subunit alpha [OS=Homo sapiens]	P16499
6,074677	5,584962	5,545351	5,719731	5,974988	7,223036	7,175924	7,050937	7,122052	7,289097	FALSK		10	+	CRVO_Control	2	3	2	1	532	0	2	5,45E-05	0,000649659	1,392267513	0,670384812	SLC18A3	Vesicular acetylcholine transporter [OS=Homo sapiens]	Q16572
6,018766	5,773155	5,494349	5,827747	5,807709	7,197125	7,153607	7,116504	7,157346	7,241432	FALSK			+	CRVO_Control	12	29	11	1	597	1	12	4,31E-05	0,000600747	1,38885746	0,670224874		Isoform 4 of MAGUK p55 subfamily member 2 [OS=Homo sapiens]	Q14168-4
5,836779	5,555324	5,765824	5,613333	5,797871	7,083136	7,131444	7,334352	7,007908	7,226501	FALSK			+	CRVO_Control	7	12	7	1	484	0	7	1,91E-05	0,000502401	1,442842197	0,700030308		Isoform 3 of Regulator of G-protein signaling 9 [OS=Homo sapiens]	O75916-3
6,096655	5,915139	5,325082	5,820913	5,741422	7,204515	7,351354	7,135627	7,124337	7,021134	FALSK		3	+	CRVO_Control	3	14	2	1	539	0	3	0,000298712	0,001440733	1,387551403	0,655140124	MAP4	Isoform 3 of Microtubule-associated protein 4 [OS=Homo sapiens]	P27816-3
5,859729	5,679853	5,85116	5,625164	5,903158	7,045418	7,152389	7,416759	7,082158	7,113216	FALSK		2	+	CRVO_Control	7	11	7	1	456	0	7	5,44E-05	0,000650751	1,378175259	0,663856874	PDK1	Isoform 2 of [Pyruvate dehydrogenase (acetyl-transferring)] kinase isozyme 1, mitochondrial [OS=Homo sapiens]	Q15118-2
6,005068	5,889737	5,496214	5,763181	5,806435	7,074818	7,241155	7,17964	7,12273	7,230084	FALSK		13	+	CRVO_Control	9	70	9	1	213	0	9	0,000147645	0,001019532	1,377558422	0,656657262	LOC733678;ATP5O	ATP synthase subunit O, mitochondrial [OS=Sus scrofa]	Q2EN81
6,0199	5,575889	5,703899	5,79727	5,885415	7,110388	7,19224	7,138492	7,191404	7,213668	FALSK		19	+	CRVO_Control	7	23	7	1	560	0	7	8,69E-05	0,000784364	1,37276392	0,658328057	SLC17A7	Vesicular glutamate transporter 1 [OS=Homo sapiens]	Q9P2U7
6,000704	5,629277	5,502619	5,797073	5,809385	7,062846	7,126807	7,163332	7,223926	7,2241	FALSK		1	+	CRVO_Control	7	12	7	1	1358	0	7	0,000134333	0,000983121	1,412390232	0,673230757	TNR	Tenascin-R [OS=Homo sapiens]	Q92752
5,729229	5,815088	5,785649	5,912889	5,799491	7,126188	7,175786	7,214716	7,221528	7,101708	FALSK		12	+	CRVO_Control	16	637	12	1	434	1	16	6,43E-07	0,000348109	1,359516048	0,671495521	ENO2	Gamma-enolase [OS=Homo sapiens]	P09104
5,894053	5,777204	5,623738	5,873412	5,83137	7,145672	7,212046	7,158477	7,166464	7,158859	FALSK		5	+	CRVO_Control	2	8	2	1	124	0	2	1,19E-05	0,000526263	1,368348217	0,666994585	NDUFS6	NADH dehydrogenase [ubiquinone] iron-sulfur protein 6, mitochondrial [OS=Homo sapiens]	O75380
5,889275	5,468293	5,883689	5,747135	5,998378	7,163033	7,035584	7,306469	7,107722	7,213229	FALSK		17	+	CRVO_Control	4	30	4	1	200	0	4	2,39E-05	0,00051967	1,367853737	0,663593836	RCVRN	Recoverin [OS=Homo sapiens]	P35243
5,853054	5,903013	5,529655	5,850133	5,87005	7,037621	7,169502	7,155727	7,20975	7,25661	FALSK			+	CRVO_Control	2	4	2	1	790	0	2	5,22E-05	0,000639987	1,364661217	0,657836475		Isoform 5 of Double-stranded RNA-specific editase 1 [OS=Homo sapiens]	P78563-5
5,765496	5,92955	5,530766	5,94479	5,863203	7,109447	7,185132	7,12941	7,223441	7,182799	FALSK		14	+	CRVO_Control	6	13	4	1	490	0	6	2,53E-05	0,000520648	1,359284878	0,659274334	RGS6	Isoform 3 of Regulator of G-protein signaling 6 [OS=Homo sapiens]	P49758-3
5,731767	5,869627	5,660209	5,839969	5,906153	7,11173	7,193332	7,161786	7,118373	7,238137	FALSK		11	+	CRVO_Control	9	16	9	1	763	0	9	3,67E-06	0,000605472	1,363126945	0,668796251	GUCY1A2	Isoform 2 of Guanylate cyclase soluble subunit alpha-2 [OS=Homo sapiens]	P33402-2
5,896995	5,989927	5,560993	5,744098	5,839045	7,101671	7,205307	7,22207	7,104296	7,193812	FALSK		22	+	CRVO_Control	3	14	3	1	296	0	3	7,90E-05	0,000739448	1,359219933	0,6527259	PDXP	Pyridoxal phosphate phosphatase [OS=Homo sapiens]	Q96GD0
6,007092	5,73734	5,59956	5,868687	5,830321	7,171014	7,198981	7,138528	7,190663	7,130664	FALSK		1	+	CRVO_Control	4	11	4	1	354	0	4	3,20E-05	0,000564482	1,357369995	0,657166262	NEGR1	Neuronal growth regulator 1 [OS=Homo sapiens]	Q7Z3B1
5,916445	5,609039	5,634259	6,028725	5,830942	7,182394	7,187131	7,138501	7,154092	7,152274	FALSK		4	+	CRVO_Control	2	4	2	1	497	0	2	7,68E-05	0,000740982	1,358996296	0,652805065	GLRB	Glycine receptor subunit beta [OS=Homo sapiens]	P48167
6,218106	5,680492	5,409327	5,842608	5,835417	7,182076	7,13594	7,115254	7,195282	7,190116	FALSK		22	+	CRVO_Control	6	22	6	1	355	0	6	0,000333385	0,001550751	1,366543579	0,644755837	GNAZ	guanine nucleotide-binding protein G(z) subunit alpha [OS=Homo sapiens]	P19086
5,967597	5,664825	5,686313	5,812635	5,922382	7,098708	7,172741	7,191651	7,088018	7,260077	FALSK		9	+	CRVO_Control	13	60	13	1	509	0	13	4,65E-05	0,000614692	1,35148859	0,652371549	DLD	Dihydrolipoyl dehydrogenase, mitochondrial [OS=Sus scrofa]	P09623
5,726527	5,539442	5,862206	6,036267	5,893314	7,095381	7,179267	7,144588	7,188121	7,209095	FALSK		17	+	CRVO_Control	22	88	22	1	838	0	22	7,34E-05	0,000721108	1,351738834	0,649743585	ATP6V0A1	Isoform 3 of V-type proton ATPase 116 kDa subunit a isoform 1 [OS=Homo sapiens]	Q93050-3
5,887249	5,963881	5,429294	5,982809	5,720061	7,376347	7,308694	6,730138	7,002822	7,290247	FALSK		MT	+	CRVO_Control	2	4	2	1	347	0	2	0,000142206	0,001003915	1,34499073	0,642118406	ND2	NADH-ubiquinone oxidoreductase chain 2 [OS=Sus scrofa]	O79875
5,840918	5,884392	5,621926	5,856582	5,891028	7,213586	7,100661	7,184697	7,14845	7,161808	FALSK		4	+	CRVO_Control	15	36	15	1	619	0	15	2,43E-05	0,000517514	1,342871284	0,651738741	GUCY1B3	guanylate cyclase soluble subunit beta-1 [OS=Homo sapiens]	Q02153
5,250281	6,008982	5,59527	5,958813	6,151772	7,145626	7,191625	7,262481	7,169248	7,027099	FALSK		15	+	CRVO_Control	6	41	5	1	203	0	6	0,001719259	0,004896853	1,366191959	0,625842744	HDGFRP3	Hepatoma-derived growth factor-related protein 3 [OS=Homo sapiens]	Q9Y3E1
5,82399	5,847962	5,463907	5,873803	6,026433	7,009288	7,077178	7,293749	7,140826	7,261655	FALSK			+	CRVO_Control	3	5	3	1	258	0	3	0,000366091	0,00166011	1,349320221	0,636221283	LOC100622581;CCDC127	Coiled-coil domain-containing protein 127 [OS=Sus scrofa]	P0C267
5,999274	5,210727	6,038607	5,893604	5,807263	7,133662	7,32998	7,128787	7,114018	7,078255	FALSK		16;CHR_HSCHR16_4_CTG3_1	+	CRVO_Control	11	73	10	1	271	1	11	0,002004831	0,005467851	1,367045307	0,624022255	CALB2	Calretinin [OS=Homo sapiens]	P22676
5,832515	5,706248	5,817179	5,86416	5,920743	7,181322	7,174184	7,321248	7,076815	7,032227	FALSK		8	+	CRVO_Control	3	42	3	1	71	0	3	5,82E-05	0,000664854	1,328990269	0,640611993	ATP5I	ATP synthase subunit e, mitochondrial [OS=Sus scrofa]	Q9MYT8
5,980689	5,881191	5,51425	5,782622	5,955696	7,128667	7,096923	7,263503	7,123086	7,180816	FALSK		2	+	CRVO_Control	5	18	5	1	118	0	5	0,000244877	0,001285776	1,335709476	0,633664118	QIL1;C2H19orf70	MICOS complex subunit MIC13 [OS=Sus scrofa]	A1XQR7
5,958796	5,787334	5,705713	5,818896	5,886293	7,055279	7,186348	7,265819	7,054183	7,22254	FALSK		1	+	CRVO_Control	14	76	2	1	510	13	14	6,97E-05	0,000708628	1,32542696	0,637890335	FH	fumarate hydratase, mitochondrial [OS=Homo sapiens]	P07954
5,273447	5,802999	5,76745	6,07714	6,045139	7,177593	7,136006	7,104959	7,174909	7,183792	FALSK		17	+	CRVO_Control	8	17	8	1	1384	0	8	0,000697639	0,002560261	1,362216854	0,635344628	CNTNAP1	Contactin-associated protein 1 [OS=Homo sapiens]	P78357
6,118939	5,790341	5,683599	5,761448	5,79733	7,052014	7,268571	7,153736	7,021223	7,272857	FALSK		12	+	CRVO_Control	9	49	9	1	362	0	9	0,000237447	0,001269624	1,323348713	0,628347617	SLC25A3	Phosphate carrier protein, mitochondrial [OS=Homo sapiens]	Q00325-1
5,78267	5,783864	5,730189	5,908574	5,970597	7,069334	7,325357	7,042946	7,118931	7,182528	FALSK		3	+	CRVO_Control	9	15	9	1	3926	0	9	2,70E-05	0,000517383	1,312640381	0,63699233	BSN	Protein bassoon [OS=Homo sapiens]	Q9UPA5
6,072514	5,876115	5,630013	5,746577	5,811838	7,200823	7,163282	7,089527	7,192415	7,105532	FALSK		19	+	CRVO_Control	4	5	4	1	1474	0	4	2,63E-05	0,000521689	1,322904396	0,641957817	LPHN1;ADGRL1	Adhesion G protein-coupled receptor L1 [OS=Homo sapiens]	O94910
5,76823	6,215184	5,444143	5,984441	5,678226	6,904759	7,58402	6,891747	7,318838	6,918504	FALSK		12	+	CRVO_Control	17	31	17	1	1675	0	17	1,71E-05	0,000483312	1,30552845	0,635671159	KIF21A	Isoform 4 of Kinesin-like protein KIF21A [OS=Homo sapiens]	Q7Z4S6-4
5,889829	5,953028	5,660964	5,857618	5,865167	7,103778	7,229222	7,13544	7,086698	7,20651	FALSK		X	+	CRVO_Control	13	70	3	1	389	10	13	1,03E-05	0,000499415	1,307008266	0,638379359	PDHA1	Pyruvate dehydrogenase E1 component subunit alpha, somatic form, mitochondrial [OS=Sus scrofa]	P29804
6,055933	5,789729	5,646161	5,919381	5,80602	6,966022	7,18181	7,221101	7,10048	7,264824	FALSK		8	+	CRVO_Control	2	8	2	1	140	0	2	0,00037376	0,001680813	1,303402615	0,615583316	UQCRB	Isoform 2 of Cytochrome b-c1 complex subunit 7 [OS=Homo sapiens]	P14927-2
5,988678	5,908901	5,749255	5,659435	5,944695	6,905687	7,147971	7,320889	6,939527	7,374125	FALSK		1	+	CRVO_Control	7	29	7	1	239	0	7	0,00030118	0,001443457	1,287447071	0,610260609	AK2	Adenylate kinase 2, mitochondrial [OS=Homo sapiens]	P54819
6,040542	5,864143	5,738657	5,790428	5,80179	7,052979	7,204862	7,162822	7,091034	7,229682	FALSK		17	+	CRVO_Control	8	19	8	1	764	0	8	6,90E-05	0,000708636	1,301163769	0,626705547	PPM1E	Protein phosphatase 1E [OS=Homo sapiens]	Q8WY54
5,12638	6,330806	5,406024	5,991853	6,087803	7,228663	7,200642	7,0831	7,11175	7,116755	FALSK		X	+	CRVO_Control	6	13	2	1	848	1	6	0,004107237	0,009273696	1,359608841	0,609659654	NLGN3	Neuroligin-3 [OS=Homo sapiens]	Q9NZ94
6,057425	5,817714	5,614794	5,831501	5,923223	7,048336	7,204791	7,201134	7,082906	7,201442	FALSK		11	+	CRVO_Control	8	22	8	1	501	0	8	0,000179474	0,001111743	1,298790455	0,619374918	PDHX	Pyruvate dehydrogenase protein X component, mitochondrial [OS=Homo sapiens]	O00330-1
6,144217	5,800691	5,51213	5,926951	5,829083	7,204273	7,281997	7,208414	7,221551	6,770778	FALSK		17	+	CRVO_Control	4	39	2	1	116	3	4	0,000700409	0,002562983	1,294788265	0,605870868	VAMP2	Vesicle-associated membrane protein 2 [OS=Homo sapiens]	P63027
6,120962	5,979262	5,507708	5,785246	5,814342	7,195122	7,08828	7,17255	7,160989	7,127026	FALSK		8	+	CRVO_Control	16	251	13	1	572	0	16	0,000251619	0,001297806	1,307289505	0,620641159	DPYSL2	Dihydropyrimidinase-related protein 2 [OS=Homo sapiens]	Q16555-1
6,018251	5,650405	5,632327	5,967399	5,934764	7,164289	7,253064	6,818702	6,910073	7,492994	FALSK			+	CRVO_Control	3	16	3	1	228	0	3	0,000530862	0,002129626	1,287195206	0,605215171		Cytochrome c oxidase subunit 2 [OS=Sus scrofa]	P50667
6,166731	5,729985	5,661995	5,820841	5,88343	7,138466	7,207976	7,106062	7,165182	7,11472	FALSK		20	+	CRVO_Control	5	11	5	1	198	0	5	0,000143904	0,001012133	1,293884945	0,618700435	DNAJC5	DnaJ homolog subfamily C member 5 [OS=Homo sapiens]	Q9H3Z4
6,03506	5,76184	5,529483	5,954324	5,980332	7,285463	7,323152	6,858603	6,948899	7,252553	FALSK			+	CRVO_Control	5	73	5	1	97	0	5	0,000144625	0,001013441	1,281526184	0,61301275		Cytochrome c oxidase subunit 4 isoform 1, mitochondrial [OS=Sus scrofa]	Q95283
5,789206	5,827783	5,857767	5,939401	5,911405	7,160268	7,194254	7,149741	7,127203	7,098029	FALSK		5	+	CRVO_Control	9	57	9	1	322	0	9	6,08E-06	0,000479966	1,280786514	0,627621207	PURA	Transcriptional activator protein Pur-alpha [OS=Homo sapiens]	Q00577
6,043796	5,71898	5,73192	5,919641	5,906349	7,117872	7,114252	7,191798	7,114783	7,182384	FALSK		11	+	CRVO_Control	5	10	3	1	766	2	5	4,97E-05	0,000641275	1,280080509	0,618690405	BRSK2	Isoform 5 of Serine/threonine-protein kinase BRSK2 [OS=Homo sapiens]	Q8IWQ3-5
6,060647	5,709311	5,699262	5,956897	5,889755	7,066424	7,173885	7,132828	7,186331	7,159744	FALSK		15	+	CRVO_Control	7	24	7	1	398	0	7	9,96E-05	0,000844936	1,280668068	0,615022366	NPTN	Neuroplastin [OS=Homo sapiens]	Q9Y639-2
5,914086	5,442944	5,947198	5,892391	6,093814	7,150763	7,113742	7,226894	7,070389	7,149747	FALSK		2	+	CRVO_Control	2	2	2	1	190	0	2	0,000244485	0,00128728	1,284220505	0,610454633	COMMD1	COMM domain-containing protein 1 [OS=Homo sapiens]	Q8N668
5,905637	5,842839	5,772808	5,911596	5,924753	7,000524	7,145677	7,238252	7,066086	7,248875	FALSK		7	+	CRVO_Control	18	62	12	1	676	0	18	4,23E-05	0,000602963	1,268355942	0,614022559	SLC25A13	Isoform 2 of Calcium-binding mitochondrial carrier protein Aralar2 [OS=Homo sapiens]	Q9UJS0-2
5,951747	5,912745	5,729716	5,877736	5,889927	7,247412	7,261321	7,121455	7,097985	6,966466	FALSK		7	+	CRVO_Control	6	12	6	1	457	0	6	2,18E-05	0,000515704	1,266553497	0,616192491	ADSSL1	Adenylosuccinate synthetase isozyme 1 [OS=Sus scrofa]	A4Z6H0
5,801961	5,92276	5,732388	5,904759	5,990987	7,162835	7,132528	7,165822	7,172922	7,074673	FALSK		1	+	CRVO_Control	14	29	14	1	1240	0	14	3,04E-05	0,000548949	1,271184921	0,616917817	NFASC	Isoform 9 of Neurofascin [OS=Homo sapiens]	O94856-9
6,305757	5,830688	5,632177	5,805916	5,690458	7,081941	7,148099	7,113163	7,17285	7,188802	FALSK		3	+	CRVO_Control	19	115	3	1	617	0	19	0,0006251	0,002379273	1,287971592	0,604003971	ATP6V1A	V-type proton ATPase catalytic subunit A [OS=Homo sapiens]	P38606
5,998597	5,882622	5,754865	5,83531	5,904321	7,094314	7,159866	7,121529	7,110559	7,217686	FALSK		18	+	CRVO_Control	23	56	22	1	797	0	23	1,00E-05	0,000506575	1,265647411	0,618717432	AFG3L2	AFG3-like protein 2 [OS=Homo sapiens]	Q9Y4W6
5,912639	5,846652	5,689256	6,058513	5,858491	7,100651	7,109433	7,166295	7,178405	7,148218	FALSK		1	+	CRVO_Control	25	97	13	1	873	2	25	3,01E-05	0,00054631	1,267490292	0,61522081	DNM3	Isoform 4 of Dynamin-3 [OS=Homo sapiens]	Q9UQ16-4
5,957548	5,79409	5,881145	5,830722	5,911492	7,081027	7,2145	7,232492	7,088137	7,077244	FALSK		10	+	CRVO_Control	6	20	5	1	325	0	6	2,20E-05	0,000514601	1,263680553	0,614789532	SFXN3	Sideroflexin-3 [OS=Homo sapiens]	Q9BWM7
5,993177	5,905507	5,71521	5,894687	5,874025	6,977278	7,191287	7,20065	7,099084	7,219653	FALSK		7	+	CRVO_Control	3	17	3	1	227	0	3	0,000109798	0,000891318	1,261068916	0,605388434	CHCHD3	MICOS complex subunit MIC19 [OS=Homo sapiens]	Q9NX63
5,862462	5,746647	5,718018	5,883678	6,070504	7,225617	7,196685	7,095034	7,112886	7,047141	FALSK		15	+	CRVO_Control	3	4	3	1	570	0	3	0,0001065	0,000875793	1,279210758	0,613936732	FRMD5	FERM domain-containing protein 5 [OS=Homo sapiens]	Q7Z6J6-1
6,003304	5,59585	5,965415	5,744979	6,042603	7,08415	6,944851	7,171038	7,063133	7,394891	FALSK		10	+	CRVO_Control	5	15	5	1	743	0	5	1,76E-05	0,000488249	1,261182213	0,614498474	THNSL1	Threonine synthase-like 1 [OS=Homo sapiens]	Q8IYQ7
5,97023	5,833589	5,713184	5,885219	5,974578	6,967919	7,065796	7,168764	7,054676	7,390512	FALSK		1	+	CRVO_Control	3	6	3	1	308	0	3	0,000115666	0,00090973	1,25417347	0,601892111	TOMM40L	Mitochondrial import receptor subunit TOM40B [OS=Homo sapiens]	Q969M1
5,999972	5,840198	5,69853	5,837934	6,013341	7,112699	7,154849	7,083194	7,112694	7,217028	FALSK		14	+	CRVO_Control	7	16	7	1	463	0	7	1,13E-05	0,000514843	1,258097744	0,614700456	L2HGDH	L-2-hydroxyglutarate dehydrogenase, mitochondrial [OS=Homo sapiens]	Q9H9P8-1
6,068979	5,86742	5,683694	5,887443	5,898928	7,061152	7,229242	7,139039	7,070897	7,180248	FALSK		8	+	CRVO_Control	6	17	6	1	358	0	6	9,42E-05	0,000824617	1,254822731	0,603422127	GDAP1	ganglioside-induced differentiation-associated protein 1 [OS=Homo sapiens]	Q8TB36
6,13544	6,165906	5,531077	5,417567	6,01775	7,294515	7,411075	7,003325	6,592177	7,247925	FALSK		6	+	CRVO_Control	2	8	2	1	291	0	2	2,40E-05	0,000517196	1,25625515	0,610907267	BPHL	valacyclovir hydrolase [OS=Homo sapiens]	Q86WA6
6,065858	5,808486	5,705763	5,976318	5,851511	7,015058	7,164374	7,105066	7,176369	7,214506	FALSK		14	+	CRVO_Control	2	8	2	1	89	0	2	0,000114311	0,000902822	1,253487396	0,601648174	TIMM9	Mitochondrial import inner membrane translocase subunit Tim9 [OS=Homo sapiens]	Q9Y5J7
6,03508	5,885674	5,629068	6,091749	5,743418	7,130365	7,069066	7,070742	7,200394	7,204343	FALSK		17	+	CRVO_Control	3	5	2	1	730	0	3	9,74E-05	0,000837394	1,257983971	0,604685411	RAP1GAP2	Rap1 GTPase-activating protein 2 [OS=Homo sapiens]	Q684P5
6,044543	5,210901	5,861617	5,913447	5,710812	7,139725	7,122299	6,975371	7,140561	7,212198	FALSK		5	+	CRVO_Control	6	14	4	1	474	2	6	0,000874542	0,002949633	1,369766617	0,636030107	GABRB2	Isoform 2 of Gamma-aminobutyric acid receptor subunit beta-2 [OS=Homo sapiens]	P47870-1
5,152888	6,140896	5,749475	6,118508	6,055923	7,011618	7,190809	7,060676	7,138335	7,262858	FALSK		9	+	CRVO_Control	2	4	2	1	210	0	2	0,001056127	0,003373021	1,289321518	0,599156628	FXN	Frataxin, mitochondrial [OS=Homo sapiens]	Q16595-1
5,942141	5,740067	5,71156	5,965428	6,055014	7,058299	7,227463	7,162304	7,094522	7,12979	FALSK		9	+	CRVO_Control	13	87	9	1	352	4	13	0,00015105	0,001024384	1,251633835	0,599037475	SH3GL2	Endophilin-A1 [OS=Homo sapiens]	Q99962
5,89068	5,655488	6,010627	5,983469	5,862331	6,997312	7,237265	7,005505	7,067881	7,335186	FALSK		17	+	CRVO_Control	5	17	5	1	314	0	5	0,000434291	0,001866665	1,248110485	0,589625013	SLC25A11	Mitochondrial 2-oxoglutarate/malate carrier protein [OS=Homo sapiens]	Q02978
6,03928	5,928362	5,64122	5,829088	5,979974	7,069186	7,177326	7,12252	7,139863	7,164065	FALSK		17	+	CRVO_Control	6	40	6	1	290	0	6	7,24E-05	0,000720047	1,251007175	0,6031411	ATP1B2	sodium/potassium-transporting ATPase subunit beta-2 [OS=Homo sapiens]	P14415
5,89724	5,963474	5,539159	6,118941	5,899659	7,124121	7,151778	6,966938	7,22207	7,192786	FALSK		7	+	CRVO_Control	7	23	4	1	418	0	7	2,15E-05	0,000519648	1,247843933	0,607377993	ACTR3B	Actin-related protein 3B [OS=Homo sapiens]	Q9P1U1-1
5,789207	5,536053	5,587965	6,364573	6,035624	7,052024	7,263973	7,199672	6,874059	7,244126	FALSK		6	+	CRVO_Control	2	3	2	1	323	0	2	0,004050409	0,009183672	1,264086533	0,571175726	SLC25A27	Mitochondrial uncoupling protein 4 [OS=Homo sapiens]	O95847
5,745551	5,396757	6,727232	5,541926	5,62931	7,479607	6,82601	7,064985	7,229165	6,969391	FALSK		10			3	38	2	1	127	0	3	0,006715393	0,013370827	1,305676556	0,579470848	SNCG	Gamma-synuclein [OS=Homo sapiens]	O76070
5,931664	5,947191	5,804719	5,942484	5,872753	7,132277	7,161879	7,171381	7,165402	7,022845	FALSK		13	+	CRVO_Control	20	122	4	1	617	16	20	4,46E-06	0,000528374	1,230994701	0,604555672	ATP6V1A	V-type proton ATPase catalytic subunit A [OS=Sus scrofa]	Q29048
5,808173	5,743418	5,855834	6,005571	6,045129	7,05172	7,175653	7,008235	7,233675	7,169412	FALSK		13	+	CRVO_Control	5	8	5	1	3013	0	5	2,14E-05	0,000520369	1,23611412	0,601838498	FRY	Protein furry homolog [OS=Homo sapiens]	Q5TBA9
6,060682	5,906691	5,750695	5,847988	5,933083	7,010056	7,122548	7,228981	7,095918	7,186362	FALSK		2	+	CRVO_Control	13	35	13	1	758	0	13	0,000127574	0,00095203	1,228945446	0,589676891	IMMT	MICOS complex subunit Mic60 [OS=Homo sapiens]	Q16891
6,371558	5,615869	5,515458	5,923106	5,864974	7,110635	7,140256	7,033673	7,218133	7,134801	FALSK			+	CRVO_Control	9	13	6	1	901	1	9	0,000889272	0,00298339	1,26930685	0,5923111		Isoform 3 of Glutamate receptor 2 [OS=Homo sapiens]	P42262-3
5,920114	5,973453	5,645347	5,951809	5,995552	7,05883	7,165371	7,158812	7,062725	7,200605	FALSK		21	+	CRVO_Control	2	9	2	1	268	0	2	7,00E-05	0,00070813	1,232013798	0,594478261	C21orf33;LOC102724023	ES1 protein homolog, mitochondrial [OS=Homo sapiens]	P30042-1
6,00271	5,934835	5,844191	5,933093	5,812222	7,057969	7,151754	7,208799	7,143568	7,07788	FALSK	Acetyl [N-Term]	4	+	CRVO_Control	17	69	3	1	558	14	17	1,67E-05	0,0004956	1,222583866	0,59635289	RAP1GDS1	Isoform 2 of Rap1 GTPase-GDP dissociation stimulator 1 [OS=Homo sapiens]	P52306-2
6,062516	5,980897	5,536201	5,962493	5,937644	7,139267	7,128246	7,12456	7,146652	7,104323	FALSK		10	+	CRVO_Control	9	24	8	1	270	1	9	0,00017028	0,001081294	1,232659531	0,58956971	NEBL	Isoform 2 of Nebulette [OS=Homo sapiens]	O76041-2
6,03615	6,057409	5,656765	5,900854	5,855414	7,027891	7,19869	7,176739	7,115293	7,117893	FALSK		7	+	CRVO_Control	6	20	5	1	286	1	6	0,000144439	0,001014013	1,225982761	0,587554612	GBAS	Protein NipSnap homolog 2 [OS=Homo sapiens]	O75323-1
6,154602	5,990376	5,579381	5,902767	5,840179	7,092738	7,119814	7,080004	7,197679	7,145934	FALSK		1	+	CRVO_Control	2	15	2	1	145	0	2	0,000198259	0,00116347	1,233772659	0,589067682	TOMM20	Mitochondrial import receptor subunit TOM20 homolog [OS=Homo sapiens]	Q15388
6,244106	5,840428	5,524366	6,124177	5,662372	7,044324	7,183846	7,079951	7,280769	7,03105	FALSK		20	+	CRVO_Control	2	4	2	1	386	0	2	0,000623655	0,002376156	1,244898319	0,585040175	GDAP1L1	Isoform 3 of Ganglioside-induced differentiation-associated protein 1-like 1 [OS=Homo sapiens]	Q96MZ0-4
6,094332	6,016354	5,587214	5,956908	5,819987	7,148386	7,164872	7,064593	7,156166	7,09312	FALSK		9	+	CRVO_Control	3	8	3	1	515	0	3	6,61E-05	0,000713452	1,230468655	0,594063957	LOC100522562;PVRL1;NECTIN1	Nectin-1 [OS=Sus scrofa]	Q9GL76
6,030544	5,818208	5,84829	5,86202	5,971153	7,039849	7,148213	7,169399	7,10704	7,166411	FALSK		17	+	CRVO_Control	18	48	15	1	767	3	18	3,08E-05	0,000553069	1,220139503	0,592792825	DLG4	Isoform 2 of Disks large homolog 4 [OS=Homo sapiens]	P78352-2
6,101188	5,876516	5,715618	5,869681	5,972429	7,082653	7,128146	7,124634	7,054197	7,237438	FALSK		7	+	CRVO_Control	9	41	9	1	455	0	9	6,26E-05	0,000691392	1,21832695	0,588676088	DLST	Dihydrolipoyllysine-residue succinyltransferase component of 2-oxoglutarate dehydrogenase complex, mitochondrial [OS=Sus scrofa]	Q9N0F1
6,215344	5,758884	5,510792	5,986403	5,994376	7,092718	7,222547	7,115486	7,15614	7,039	FALSK		14	+	CRVO_Control	5	9	2	1	510	0	5	0,000769825	0,002712275	1,23201828	0,577419396	NOVA1	RNA-binding protein Nova-1 [OS=Homo sapiens]	P51513-1
6,047558	5,968812	5,800744	5,808573	5,927933	7,10887	7,121501	7,065329	7,12604	7,197821	FALSK		3	+	CRVO_Control	10	16	6	1	1259	1	10	1,29E-05	0,000500924	1,213188076	0,592778139	SLC4A7	Isoform 7 of Sodium bicarbonate cotransporter 3 [OS=Homo sapiens]	Q9Y6M7-7
6,001073	5,907167	5,734637	6,005544	5,91292	7,160137	7,081482	7,174201	7,11338	7,089551	FALSK		1	+	CRVO_Control	18	35	18	1	731	0	18	3,18E-05	0,000563464	1,211481953	0,588567854	NCDN	Isoform 3 of Neurochondrin [OS=Homo sapiens]	Q9UBB6-3
6,027872	5,93428	5,833476	5,861515	5,924773	7,113216	7,106408	7,212818	7,097503	7,087238	FALSK		16	+	CRVO_Control	6	14	5	1	117	1	6	1,65E-05	0,000499398	1,207053757	0,589017794	GABARAPL2	Gamma-aminobutyric acid receptor-associated protein-like 2 [OS=Homo sapiens]	P60520
5,903836	5,968691	5,64498	5,905735	6,097578	7,138897	7,119468	7,194005	7,132239	7,021664	FALSK		5	+	CRVO_Control	4	7	4	1	1237	0	4	0,00026371	0,001329422	1,217090321	0,579508871	PCDH1	Isoform 2 of Protocadherin-1 [OS=Homo sapiens]	Q08174-2
5,850478	5,947901	5,800693	5,945307	6,027745	7,167102	7,06086	7,087348	7,071193	7,217087	FALSK		2	+	CRVO_Control	2	5	2	1	291	0	2	8,17E-06	0,000476561	1,206293201	0,590946901	C2orf47	m-AAA protease-interacting protein 1, mitochondrial [OS=Homo sapiens]	Q8WWC4
5,613359	5,801083	5,95794	6,047012	6,047998	7,056956	7,15113	7,144217	7,104507	7,141929	FALSK	Acetyl [N-Term]	10	+	CRVO_Control	6	10	3	1	698	2	6	7,86E-05	0,000737154	1,226269436	0,591197589	CPEB3	Cytoplasmic polyadenylation element-binding protein 3 [OS=Homo sapiens]	Q8NE35-1
6,073272	5,964551	5,6864	5,978691	5,871554	6,992652	7,166911	7,133347	7,208457	7,101139	FALSK		7	+	CRVO_Control	4	10	4	1	422	0	4	0,000137356	0,000989958	1,205607128	0,578488157	AGK	Acylglycerol kinase, mitochondrial [OS=Homo sapiens]	Q53H12
5,961694	5,898999	5,670821	6,070119	5,963111	7,0052	7,131075	7,144577	7,169936	7,151225	FALSK		X	+	CRVO_Control	12	63	5	1	434	0	12	8,38E-05	0,000765723	1,207454014	0,582106462	sep-06	Septin-6 [OS=Homo sapiens]	Q14141-1
5,951142	5,764671	5,09902	6,046841	5,49259	7,141686	7,035641	6,856143	7,563626	6,629752	FALSK		17	+	CRVO_Control	2	5	2	1	1621	0	2	0,000287091	0,001406155	1,374516869	0,649687794	ABCA8	Isoform 3 of ATP-binding cassette sub-family A member 8 [OS=Homo sapiens]	O94911-3
6,017922	5,912943	5,771134	5,959596	5,945842	7,081522	7,142513	7,096416	7,142855	7,142535	FALSK		3	+	CRVO_Control	19	61	12	1	1199	0	19	9,03E-06	0,000482373	1,199680996	0,587471167	ATP2B2	Isoform WA of Plasma membrane calcium-transporting ATPase 2 [OS=Homo sapiens]	Q01814-2
5,990007	6,024754	5,758827	5,777942	6,014309	6,970398	7,124477	7,012871	7,271304	7,201631	FALSK		1	+	CRVO_Control	2	4	2	1	465	0	2	0,000150441	0,001022081	1,202968311	0,576729859	CELF3	CUGBP Elav-like family member 3 [OS=Homo sapiens]	Q5SZQ8
6,006452	5,90778	5,753578	5,861694	6,074319	7,20697	7,045486	7,126702	7,186645	7,030996	FALSK		17	+	CRVO_Control	3	102	2	1	89	0	3	8,37E-05	0,000766369	1,198595333	0,577995771	DYNLL2	Dynein light chain 2, cytoplasmic [OS=Homo sapiens]	Q96FJ2
6,122456	5,921611	5,749666	5,856865	5,95176	7,059419	7,13084	7,113881	7,129837	7,163788	FALSK		20	+	CRVO_Control	18	56	15	1	881	1	18	7,33E-05	0,00072383	1,199081421	0,578899718	EPB41L1	Band 4.1-like protein 1 [OS=Homo sapiens]	Q9H4G0-1
5,946025	6,059535	5,417851	6,020607	6,098018	7,044923	7,053052	6,752856	7,469468	7,184799	FALSK		16	+	CRVO_Control	3	49	3	1	314	0	3	0,000151883	0,001022717	1,192612362	0,571910928	CRYM	Ketimine reductase mu-crystallin [OS=Homo sapiens]	Q14894
6,083188	5,817603	5,86935	5,928893	5,925703	7,038527	7,130164	7,169009	7,119113	7,128022	FALSK		3	+	CRVO_Control	25	78	25	1	608	0	25	4,93E-05	0,000640033	1,192019558	0,5774935	TOMM70A;TOMM70	Mitochondrial import receptor subunit TOM70 [OS=Homo sapiens]	O94826
5,999295	5,911596	5,502566	6,094033	6,069776	7,007046	7,179294	7,038492	7,038881	7,302023	FALSK		14	+	CRVO_Control	16	156	16	1	294	0	16	0,000336986	0,001561751	1,197693825	0,568975397	VDAC2	Voltage-dependent anion-selective channel protein 2 [OS=Sus scrofa]	Q9MZ15
6,056298	6,200579	5,601405	5,848792	5,888739	7,066475	7,188624	7,106347	7,100605	7,123448	FALSK		3	+	CRVO_Control	22	94	22	1	500	0	22	0,000221088	0,00122715	1,197937489	0,572001494	ABAT	4-aminobutyrate aminotransferase, mitochondrial [OS=Sus scrofa]	P80147
6,105025	6,041091	5,496611	6,041061	5,900599	7,116768	7,105381	7,0546	7,162882	7,147007	FALSK		2	+	CRVO_Control	23	56	16	1	953	0	23	0,000250392	0,001298546	1,200449944	0,57231338	CTNNA2	Catenin alpha-2 [OS=Homo sapiens]	P26232
6,095043	5,725605	5,891909	5,815313	5,773742	7,080882	7,136093	7,197512	7,052	7,06146	FALSK		X	+	CRVO_Control	6	15	4	1	393	2	6	6,12E-05	0,000682406	1,245266724	0,601359659	IDH3G	isocitrate dehydrogenase [NAD] subunit gamma, mitochondrial [OS=Homo sapiens]	P51553-1
6,10567	6,007794	5,725361	5,860311	5,920855	7,103852	7,202979	7,144688	7,102952	7,015975	FALSK		2	+	CRVO_Control	24	79	13	1	1827	11	24	7,48E-05	0,000728681	1,190091038	0,574609945	MAP2	microtubule-associated protein 2 [OS=Homo sapiens]	P11137
5,952456	5,973709	5,763181	6,012007	5,969165	7,026535	7,145895	7,145561	7,106422	7,150693	FALSK		12	+	CRVO_Control	24	89	2	1	1258	21	24	2,70E-05	0,00051912	1,18091774	0,574775671	ATP2B1	Plasma membrane calcium-transporting ATPase 1 [OS=Homo sapiens]	P20020
6,199628	6,110023	5,69556	5,909375	5,634622	7,155846	7,079093	7,062742	7,059225	7,199529	FALSK		X	+	CRVO_Control	10	30	3	1	1220	0	10	0,000516459	0,002085086	1,201445484	0,567374699	ATP2B3	Plasma membrane calcium-transporting ATPase 3 [OS=Homo sapiens]	Q16720-1
5,946205	6,189402	5,659514	5,93188	5,889219	7,271794	7,150625	7,000625	7,111548	7,010208	FALSK		X	+	CRVO_Control	4	9	3	1	817	0	4	7,17E-05	0,000721008	1,185715961	0,572776556	DLG3	Disks large homolog 3 [OS=Homo sapiens]	Q92796
5,861796	5,958488	5,834726	5,945085	6,003965	7,051335	7,028036	7,121429	7,15569	7,194216	FALSK		8	+	CRVO_Control	4	16	4	1	325	0	4	4,40E-06	0,000537524	1,189328957	0,584481457	CYC1	Cytochrome c1, heme protein, mitochondrial [OS=Homo sapiens]	P08574
6,25919	5,937539	5,737117	5,817523	5,875329	7,023041	6,946113	7,124405	7,306864	7,145375	FALSK		9	+	CRVO_Control	6	12	6	1	629	0	6	0,000859027	0,002920693	1,183820057	0,555224157	SCAI	Isoform 2 of Protein SCAI [OS=Homo sapiens]	Q8N9R8-2
5,949659	5,551398	6,266519	5,957273	5,867924	7,112549	7,120261	7,135657	7,190702	6,99963	FALSK		6	+	CRVO_Control	10	16	10	1	947	0	10	0,000445002	0,001889139	1,193205357	0,564870664	SOGA3	Protein SOGA3 [OS=Homo sapiens]	Q5TF21
6,113507	6,121773	5,658209	5,794229	5,927372	6,948961	7,154099	7,096049	7,120658	7,228286	FALSK		8	+	CRVO_Control	3	10	2	1	346	0	3	0,000421678	0,001835341	1,18659277	0,562315055	KHDRBS3	KH domain-containing, RNA-binding, signal transduction-associated protein 3 [OS=Homo sapiens]	O75525-1
6,367764	5,757468	5,416065	5,891171	6,10847	7,193624	7,145664	6,660323	7,073053	7,396166	FALSK		15	+	CRVO_Control	22	436	22	1	405	0	22	0,000247084	0,001295566	1,18557806	0,56563721	SAG	S-arrestin [OS=Sus scrofa]	P79260
6,124865	6,008978	5,668119	5,910239	5,951376	7,07408	7,123871	7,092993	7,018827	7,241925	FALSK		1	+	CRVO_Control	8	13	8	1	586	0	8	0,00013716	0,000990422	1,177623558	0,565598432	ATAD3A	Isoform 2 of ATPase family AAA domain-containing protein 3A [OS=Homo sapiens]	Q9NVI7-2
6,37021	4,633042	5,614728	6,5656	4,512417	7,614234	5,755802	5,86396	7,611577	5,696604	FALSK		MT			2	3	2	1	67	0	2	0,006098807	0,012443799	0,969236183	0,443998397	ATP8	ATP synthase protein 8 [OS=Sus scrofa]	Q35914
6,12118	5,893466	5,860099	5,942905	5,854445	7,122916	7,131945	7,118043	7,084243	7,098501	FALSK		1	+	CRVO_Control	8	23	8	1	859	0	8	1,70E-05	0,000486988	1,176710796	0,574458591	SGIP1	Isoform 3 of SH3-containing GRB2-like protein 3-interacting protein 1 [OS=Homo sapiens]	Q9BQI5-3
6,023398	5,796415	5,962938	5,973763	5,952024	7,236615	6,970942	7,243412	7,151259	6,929463	FALSK		6	+	CRVO_Control	12	54	12	1	255	0	12	2,10E-05	0,000520644	1,164630795	0,567963199	ETFB	electron transfer flavoprotein subunit beta [OS=Sus scrofa]	Q6UAQ8
5,866012	5,990109	5,79187	6,008592	6,044825	7,0303	7,176058	7,081796	7,078255	7,177914	FALSK	Acetyl [N-Term]	4	+	CRVO_Control	6	31	6	1	278	0	6	5,44E-06	0,00051559	1,168582821	0,573927081	GPM6A	Neuronal membrane glycoprotein M6-a [OS=Homo sapiens]	P51674
5,944668	5,872997	5,868212	6,016932	6,013694	7,127984	7,085033	7,104205	7,154851	7,08351	FALSK		X	+	CRVO_Control	7	15	7	1	1257	0	7	2,42E-06	0,000508644	1,167816067	0,575435831	L1CAM	Neural cell adhesion molecule L1 [OS=Homo sapiens]	P32004
6,117851	5,93362	5,842418	5,925999	5,900753	7,055812	7,153202	7,137495	7,084275	7,124118	FALSK		15	+	CRVO_Control	27	60	27	1	3037	0	27	4,45E-05	0,000607507	1,166851997	0,56610645	DMXL2	Isoform 3 of DmX-like protein 2 [OS=Homo sapiens]	Q8TDJ6-3
6,009253	6,091644	5,702379	5,911564	5,977345	7,087631	7,103729	7,042006	7,120125	7,193536	FALSK		3	+	CRVO_Control	24	52	24	1	997	0	24	3,39E-05	0,000579174	1,170968056	0,569170479	OPA1	Isoform 2 of Dynamin-like 120 kDa protein, mitochondrial [OS=Homo sapiens]	O60313-2
6,142589	5,895659	5,749472	5,962113	5,964574	7,013365	7,198085	7,030108	6,959421	7,320998	FALSK		22	+	CRVO_Control	11	28	11	1	469	0	11	0,000265436	0,001336345	1,161514187	0,554212085	SAMM50	sorting and assembly machinery component 50 homolog [OS=Homo sapiens]	Q9Y512
6,031361	6,036371	5,810231	5,865589	5,971961	7,173096	7,134746	7,086159	7,133047	7,019589	FALSK		2	+	CRVO_Control	12	30	12	1	564	0	12	1,39E-05	0,000486463	1,166224861	0,570119337	DPYSL5	Dihydropyrimidinase-related protein 5 [OS=Homo sapiens]	Q9BPU6
6,139551	5,968091	5,875288	5,70044	6,035624	6,902073	7,019035	7,090642	7,059615	7,422065	FALSK		10	+	CRVO_Control	14	74	2	1	466	0	14	0,000549864	0,002175922	1,154887104	0,54608742	FH	fumarate hydratase, mitochondrial [OS=Sus scrofa]	P10173
6,256689	5,843776	5,757599	6,005911	5,828324	7,096843	7,097865	7,132449	7,119508	7,094647	FALSK		11	+	CRVO_Control	12	25	12	1	1647	0	12	0,000222959	0,00123573	1,169802761	0,55910575	MADD	MAP kinase-activating death domain protein [OS=Homo sapiens]	Q8WXG6-1
5,808607	5,856668	5,577229	6,275373	6,037271	7,232787	7,06188	7,161308	7,132773	6,910344	FALSK		7	+	CRVO_Control	2	2	2	1	288	0	2	0,001210983	0,003729356	1,188788795	0,55417256	STX1A	syntaxin-1A [OS=Homo sapiens]	Q16623
6,125226	5,997034	5,687694	5,919848	5,987281	7,055839	7,134984	7,087178	7,050933	7,203708	FALSK		1	+	CRVO_Control	7	16	7	1	757	0	7	0,000104359	0,000865702	1,163112259	0,560363113	MFN2	Mitofusin-2 [OS=Homo sapiens]	O95140
5,94358	6,000525	5,88732	5,91364	6,026418	7,016184	7,091613	7,143102	7,087965	7,19453	FALSK		2	+	CRVO_Control	10	31	10	1	197	0	10	3,93E-06	0,000572414	1,152382374	0,56688878	GPX4	Phospholipid hydroperoxide glutathione peroxidase, mitochondrial [OS=Sus scrofa]	P36968
6,112156	5,932774	5,813961	6,015206	5,884789	7,06979	7,144396	7,154661	7,109351	7,057392	FALSK		4	+	CRVO_Control	20	71	20	1	483	0	20	5,37E-05	0,000648125	1,155341053	0,559892642	ATP6V1H	V-type proton ATPase subunit H [OS=Sus scrofa]	Q9TVC1
6,094441	6,039804	5,695482	5,968812	5,937952	7,030475	7,124727	7,182623	7,156048	7,033917	FALSK		5	+	CRVO_Control	9	30	9	1	229	0	9	0,000224789	0,00123683	1,158259678	0,553779258	CLTB	clathrin light chain B [OS=Homo sapiens]	P09497-1
6,023456	5,91527	5,820158	6,005621	6,007857	6,932243	7,121116	7,149574	7,020466	7,286772	FALSK		X	+	CRVO_Control	5	10	5	1	753	0	5	0,000137972	0,000990627	1,147561741	0,5516835	ABCB7	Isoform 2 of ATP-binding cassette sub-family B member 7, mitochondrial [OS=Homo sapiens]	O75027-2
5,950679	5,929554	5,905675	6,089427	5,899627	7,08421	7,15076	7,101174	7,119975	7,07831	FALSK		16	+	CRVO_Control	13	55	13	1	351	0	13	4,28E-06	0,000559939	1,15189352	0,566450231	ATP6V0D1	V-type proton ATPase subunit d 1 [OS=Homo sapiens]	P61421
6,086195	5,940882	5,749232	6,033673	5,953774	7,050146	7,147205	7,056317	7,114602	7,162271	FALSK		2	+	CRVO_Control	11	28	11	1	1394	0	11	4,15E-05	0,000612358	1,153356838	0,560041487	LRPPRC	Leucine-rich PPR motif-containing protein, mitochondrial [OS=Homo sapiens]	P42704
5,700106	5,860466	5,991116	5,96637	6,19416	7,119855	7,11885	7,039371	7,093933	7,153783	FALSK		3	+	CRVO_Control	6	33	6	1	338	0	6	0,000136003	0,000987716	1,162714863	0,558763579	LSAMP	Limbic system-associated membrane protein [OS=Homo sapiens]	Q13449
6,173656	6,033181	5,719728	5,918766	5,909261	7,105384	7,100661	7,095389	7,05512	7,171925	FALSK		16	+	CRVO_Control	12	44	12	1	452	0	12	0,000114333	0,000901118	1,154777336	0,556021611	TUFM	elongation factor Tu, mitochondrial [OS=Homo sapiens]	P49411
5,73212	5,907215	5,948862	5,945079	6,201061	7,191778	7,047019	7,144498	7,095292	7,034579	FALSK		1	+	CRVO_Control	7	16	7	1	1012	0	7	0,00031411	0,001479245	1,155765629	0,550491391	IARS2	Isoleucine--tRNA ligase, mitochondrial [OS=Homo sapiens]	Q9NSE4
6,181864	5,882838	5,710427	6,066278	5,912801	7,16881	7,102334	7,179092	7,073066	6,984045	FALSK		7	+	CRVO_Control	2	5	2	1	1455	0	2	0,000209682	0,001197145	1,150627804	0,550710463	MAGI2	Membrane-associated guanylate kinase, WW and PDZ domain-containing protein 2 [OS=Homo sapiens]	Q86UL8-1
5,96632	5,957578	5,802416	6,020672	6,062681	7,06392	7,060692	7,116858	7,113205	7,158302	FALSK		3	+	CRVO_Control	4	5	4	1	116	0	4	1,25E-05	0,000511349	1,140662289	0,558196231	DNAJC19	mitochondrial import inner membrane translocase subunit TIM14 [OS=Homo sapiens]	Q96DA6
6,136832	5,924167	5,84187	5,890512	5,948696	6,987967	7,094121	7,143037	7,047146	7,214346	FALSK		3	+	CRVO_Control	6	23	6	1	480	0	6	0,000132398	0,000972714	1,148907852	0,552527659	UQCRC1	Cytochrome b-c1 complex subunit 1, mitochondrial [OS=Homo sapiens]	P31930
5,849615	6,115067	5,893457	5,850393	6,070792	7,014429	7,063596	7,195594	7,106744	7,118994	FALSK		9;CHR_HSCHR9_1_CTG6	+	CRVO_Control	17	22	12	1	1912	5	17	6,26E-05	0,000689604	1,144006252	0,553900496	PTPRD	Receptor-type tyrosine-protein phosphatase delta [OS=Homo sapiens]	P23468-1
6,102214	5,875286	5,592394	6,219692	6,000999	6,914663	7,048197	6,942457	7,278837	7,270521	FALSK		22	+	CRVO_Control	3	12	3	1	166	0	3	0,000268365	0,001340411	1,132818031	0,541063043	TXN2	Thioredoxin, mitochondrial [OS=Homo sapiens]	Q99757
5,859134	5,978427	5,881378	6,008014	6,125371	7,052813	7,081615	7,13276	7,089427	7,139037	FALSK		14	+	CRVO_Control	11	35	11	1	246	0	11	1,15E-05	0,000517756	1,128665638	0,55270741	TFAM	Transcription factor A, mitochondrial [OS=Sus scrofa]	Q5D144
6,218309	5,967426	5,738728	5,953021	5,955337	7,057288	7,142618	7,047967	7,045321	7,195247	FALSK		5	+	CRVO_Control	27	135	26	1	679	0	27	0,000155138	0,001033618	1,131124306	0,54345694	HSPA9	Stress-70 protein, mitochondrial [OS=Homo sapiens]	P38646
5,705077	6,127128	5,90808	6,102631	5,974047	7,180178	7,103927	7,140293	6,92182	7,121749	FALSK			+	CRVO_Control	5	7	5	1	860	0	5	0,000538636	0,002149439	1,130200958	0,53518687		Isoform 2 of Tetratricopeptide repeat protein 7B [OS=Homo sapiens]	Q86TV6-2
5,959119	5,797237	5,945318	5,961915	6,132409	6,970001	7,081381	7,069033	7,143862	7,205095	FALSK		20	+	CRVO_Control	3	6	3	1	280	0	3	1,72E-05	0,000483399	1,134674835	0,554356855	LAMP5	Lysosome-associated membrane glycoprotein 5 [OS=Homo sapiens]	Q9UJQ1-1
6,003373	5,823235	5,868465	6,071832	6,105993	7,107342	7,08896	7,078781	7,08421	7,123503	FALSK		8	+	CRVO_Control	3	5	3	1	347	0	3	2,50E-05	0,000520199	1,121979713	0,547080056	PURG	Purine-rich element-binding protein gamma [OS=Homo sapiens]	Q9UJV8
5,690453	6,205537	5,867592	6,124776	5,95069	7,224478	7,031714	7,124636	7,134939	6,953614	FALSK		16	+	CRVO_Control	14	54	14	1	419	0	14	0,000787873	0,002760469	1,12606678	0,530436534	VAT1L	Synaptic vesicle membrane protein VAT-1 homolog-like [OS=Homo sapiens]	Q9HCJ6
6,059185	6,00772	5,787864	6,04498	5,988227	7,056834	7,116771	7,107382	7,142991	7,050011	FALSK		14	+	CRVO_Control	8	25	8	1	247	0	8	3,27E-05	0,000573863	1,117202473	0,543865296	ATP6V1D	V-type proton ATPase subunit D [OS=Homo sapiens]	Q9Y5K8
6,163901	5,951868	5,675251	6,145678	5,923625	7,114783	7,129283	7,169925	7,092757	6,962317	FALSK		2	+	CRVO_Control	2	2	2	1	208	0	2	0,000391039	0,001737901	1,121748734	0,533614621	REEP1	Isoform 3 of Receptor expression-enhancing protein 1 [OS=Homo sapiens]	Q9H902-3
6,346959	5,913116	5,805249	5,792397	5,936282	7,034238	7,1869	6,974401	7,035071	7,22199	FALSK		3	+	CRVO_Control	2	3	2	1	620	0	2	0,000557666	0,00219534	1,131719398	0,535612155	SLC6A6	Sodium- and chloride-dependent taurine transporter [OS=Homo sapiens]	P31641
5,986366	5,968856	5,79691	6,085657	6,064625	7,016219	7,088523	7,087993	7,044114	7,224963	FALSK		15	+	CRVO_Control	7	16	7	1	267	0	7	4,05E-05	0,000606673	1,111879539	0,540556503	MTX2	Metaxin-2 [OS=Sus scrofa]	Q2L969
6,026099	6,183325	5,711532	5,98984	5,937183	7,032372	7,238403	7,056708	7,099606	7,023262	FALSK		12	+	CRVO_Control	5	13	5	1	1182	0	5	4,46E-05	0,000604232	1,120474529	0,544241338	IQSEC3	IQ motif and SEC7 domain-containing protein 3 [OS=Homo sapiens]	Q9UPP2
5,998846	5,953727	5,972459	5,939736	6,05337	7,183387	6,970983	7,104098	7,152532	7,047987	FALSK		15	+	CRVO_Control	10	48	3	1	245	0	10	1,46E-05	0,000484926	1,108169937	0,542192296	TPM1	Isoform 5 of Tropomyosin alpha-1 chain [OS=Homo sapiens]	P09493-5
6,209116	5,976505	5,751307	5,968812	5,981628	7,000099	7,134093	7,089233	7,010998	7,220561	FALSK		X	+	CRVO_Control	4	11	4	1	97	0	4	0,000292119	0,001417955	1,113523102	0,531739587	TIMM8A	Mitochondrial import inner membrane translocase subunit Tim8 A [OS=Homo sapiens]	O60220
5,870852	6,12982	5,931109	5,904804	6,025924	7,118314	7,106651	7,06801	7,096096	7,065363	FALSK		16	+	CRVO_Control	9	15	9	1	1431	0	9	2,23E-05	0,00051342	1,118385124	0,545742846	CASKIN1	Caskin-1 [OS=Homo sapiens]	Q8WXD9
6,060401	6,049503	5,86481	6,081082	5,871572	7,06661	7,017895	7,240791	7,109026	7,016251	FALSK		15	+	CRVO_Control	11	39	11	1	333	0	11	0,000116974	0,000914325	1,104641151	0,532627424	ETFA	Electron transfer flavoprotein subunit alpha, mitochondrial [OS=Homo sapiens]	P13804-1
5,862768	6,111084	5,783959	6,013922	6,117577	6,813331	6,977359	7,321915	7,114774	7,159875	FALSK		20	+	CRVO_Control	3	3	3	1	457	0	3	0,000705845	0,002565539	1,099588871	0,51949761	NFS1	Cysteine desulfurase, mitochondrial [OS=Homo sapiens]	Q9Y697
5,920031	5,89338	5,951715	6,170898	5,993607	6,840304	6,853537	7,325167	7,228798	7,145669	FALSK		11	+	CRVO_Control	11	17	11	1	604	0	11	0,000173724	0,00109582	1,092768669	0,525145537	ME3	NADP-dependent malic enzyme, mitochondrial [OS=Homo sapiens]	Q16798
5,906818	5,983339	6,028446	5,891479	6,109743	6,956274	7,07855	7,078805	7,172317	7,159814	FALSK		17	+	CRVO_Control	2	8	2	1	198	0	2	1,60E-05	0,000492953	1,105186939	0,540492197	MRPL12	39S ribosomal protein L12, mitochondrial [OS=Homo sapiens]	P52815
5,968091	5,914086	5,911692	6,223036	5,909293	6,892391	7,055283	7,181898	7,068241	7,236493	FALSK		1	+	CRVO_Control	7	9	2	1	1894	0	7	0,00030773	0,001465583	1,101621437	0,525995067	PLXNA2	Plexin-A2 [OS=Homo sapiens]	O75051-1
5,848049	6,203591	5,631379	6,076459	6,117857	7,195134	6,979243	7,070624	6,990369	7,205321	FALSK		10	+	CRVO_Control	5	10	5	1	786	0	5	0,00089565	0,002991551	1,112671089	0,523471095	SUPV3L1	ATP-dependent RNA helicase SUPV3L1, mitochondrial [OS=Homo sapiens]	Q8IYB8
6,01785	5,916334	5,935795	5,906169	6,094063	7,178638	6,998809	7,078243	7,115375	7,066613	FALSK		X	+	CRVO_Control	4	12	4	1	313	0	4	1,06E-05	0,000488785	1,113493443	0,545653846	SYP	Synaptophysin [OS=Homo sapiens]	P08247
6,176223	5,805812	5,955443	6,037445	5,954042	7,05311	7,077267	7,223505	7,061686	7,033255	FALSK		7	+	CRVO_Control	18	101	16	1	599	2	18	0,00012618	0,0009567	1,103971386	0,531947975	IMPDH1	Isoform 6 of Inosine-5'-monophosphate dehydrogenase 1 [OS=Homo sapiens]	P20839-6
5,937047	6,11311	5,926202	6,022373	5,940434	7,033917	7,10653	7,020213	7,170424	7,112564	FALSK		1;CHR_HG2104_PATCH	+	CRVO_Control	2	3	2	1	500	0	2	3,63E-06	0,000626147	1,100896263	0,542112885	SLC16A1	Monocarboxylate transporter 1 [OS=Homo sapiens]	P53985
6,087747	6,042438	5,680434	6,075841	5,816316	7,083502	7,046656	7,226188	7,019929	7,022795	FALSK		3	+	CRVO_Control	6	41	3	1	208	0	6	0,00050914	0,002062126	1,139258957	0,53966254	RAB6B	Ras-related protein Rab-6B [OS=Homo sapiens]	Q9NRW1
6,196346	5,846286	5,826609	6,022883	5,980674	6,992988	7,062758	7,054198	7,116264	7,208911	FALSK		16	+	CRVO_Control	3	8	3	1	156	0	3	0,000178711	0,001114298	1,112464428	0,534083601	NDUFAB1	Acyl carrier protein, mitochondrial [OS=Homo sapiens]	O14561
6,015986	6,103487	6,041607	5,76907	5,877836	7,143446	7,16991	6,887649	7,204878	6,962873	FALSK		2	+	CRVO_Control	4	5	3	1	857	0	4	0,00029834	0,00144261	1,112154102	0,530986286	AGAP1	Arf-GAP with GTPase, ANK repeat and PH domain-containing protein 1 [OS=Homo sapiens]	Q9UPQ3-1
6,196294	5,966915	5,719721	6,032099	5,917865	7,021545	6,998131	7,154033	7,239161	6,963986	FALSK		12	+	CRVO_Control	4	5	2	1	484	2	4	0,000398466	0,001758537	1,1087924	0,527624681	CACNB3	Voltage-dependent L-type calcium channel subunit beta-3 [OS=Homo sapiens]	P54284
6,090611	6,033422	5,817179	6,033287	5,980674	7,055249	7,08478	7,067698	7,037196	7,200605	FALSK		7	+	CRVO_Control	28	90	22	1	1023	6	28	4,54E-05	0,000612399	1,09807148	0,533600118	OGDH	2-oxoglutarate dehydrogenase, mitochondrial [OS=Homo sapiens]	Q02218
6,204452	6,016798	5,757535	6,021236	5,942192	7,052014	7,130828	7,114782	7,089031	7,057983	FALSK		3	+	CRVO_Control	29	81	28	1	968	1	29	0,000170329	0,001079794	1,100485325	0,528812463	AAK1	AP2-associated protein kinase 1 [OS=Sus scrofa]	F1SPM8
6,138789	6,188467	5,69766	5,91153	5,987512	7,036663	7,074073	7,063876	7,101102	7,166307	FALSK		6	+	CRVO_Control	11	38	4	1	193	7	11	0,000285105	0,001400045	1,103612423	0,527363516	HPCA	Neuron-specific calcium-binding protein hippocalcin [OS=Sus scrofa]	Q06AT1
6,160879	5,878908	5,867685	6,101796	5,947409	7,127197	7,016793	7,102237	7,062206	7,133913	FALSK		17	+	CRVO_Control	6	66	3	1	177	0	6	4,21E-05	0,000606848	1,097133732	0,533439209	NME1	Isoform 2 of Nucleoside diphosphate kinase A [OS=Homo sapiens]	P15531-2
6,174909	5,822649	5,907725	6,058318	5,994158	7,062798	7,107997	7,063924	7,084267	7,123667	FALSK		15	+	CRVO_Control	22	55	19	1	1082	3	22	7,97E-05	0,000742663	1,09697876	0,530803582	AP3B2	AP-3 complex subunit beta-2 [OS=Homo sapiens]	Q13367
5,95637	5,835204	5,610685	6,316053	6,124313	6,931324	7,063255	7,326682	6,982349	7,078801	FALSK		20	+	CRVO_Control	2	3	2	1	752	0	2	0,003262576	0,007769112	1,107957268	0,509140889	DZANK1	Double zinc ribbon and ankyrin repeat-containing protein 1 [OS=Homo sapiens]	Q9NVP4-1
6,174593	5,825701	5,731995	5,753806	6,351285	6,998356	7,073224	6,980451	7,160592	7,203929	FALSK		14	+	CRVO_Control	3	8	3	1	154	0	3	0,000676823	0,002513063	1,115834332	0,527062663	ISCA2	iron-sulfur cluster assembly 2 homolog, mitochondrial [OS=Homo sapiens]	Q86U28
5,684515	6,556081	5,72644	5,672248	6,130688	6,980564	7,30111	7,079468	7,055256	6,995338	FALSK		9	+	CRVO_Control	2	7	2	1	372	0	2	0,001093665	0,00344932	1,128352928	0,528712931	CNTFR	Ciliary neurotrophic factor receptor subunit alpha [OS=Homo sapiens]	P26992
6,113576	6,156058	5,91635	5,804109	5,987473	6,411893	6,9721	7,46377	7,07679	7,298226	FALSK		15			9	37	9	1	450	0	9	0,009120164	0,017235563	1,049042797	0,472138345	SQRDL	Sulfide:quinone oxidoreductase, mitochondrial [OS=Homo sapiens]	Q9Y6N5
5,953671	6,200801	5,783895	5,957043	6,07997	7,123382	7,093511	7,095755	7,119674	6,992654	FALSK		15	+	CRVO_Control	9	21	8	1	351	0	9	0,000176466	0,001105758	1,08991909	0,523748103	TMOD2	Tropomodulin-2 [OS=Homo sapiens]	Q9NZR1
6,197526	5,973937	5,857719	5,989991	5,963907	7,250028	7,085095	7,141563	6,820776	7,096792	FALSK		19	+	CRVO_Control	2	6	2	1	299	0	2	0,000124074	0,000942614	1,082234859	0,521926497	CRX	cone-rod homeobox protein [OS=Homo sapiens]	O43186
6,040009	6,414958	5,704553	5,722316	5,962896	6,921113	6,925468	7,197277	7,114391	7,222834	FALSK		3	+	CRVO_Control	3	4	3	1	250	0	3	0,003667085	0,008528785	1,107270336	0,507527251	MRPL47	39S ribosomal protein L47, mitochondrial [OS=Homo sapiens]	Q9HD33-1
6,517829	6,049838	5,71554	5,778495	5,800644	7,148988	7,102128	7,063226	7,169248	6,928331	FALSK		7	+	CRVO_Control	4	10	4	1	434	0	4	0,001216563	0,003743499	1,109914875	0,519697899	SCRN1	Isoform 2 of Secernin-1 [OS=Homo sapiens]	Q12765-2
6,267635	6,13387	5,806837	5,798025	5,953671	7,059468	7,158501	7,077832	6,938818	7,176248	FALSK		5	+	CRVO_Control	5	35	5	1	670	0	5	0,000217665	0,001222469	1,090165806	0,522744187	FAM169A	Soluble lamin-associated protein of 75 kDa [OS=Homo sapiens]	Q9Y6X4-1
5,96434	6,095897	5,629189	5,947009	6,310928	7,071452	7,166022	7,124118	7,0888	6,961131	FALSK		3	+	CRVO_Control	5	31	5	1	213	0	5	0,001240824	0,003784363	1,092831802	0,512033356	H1FX	Histone H1x [OS=Homo sapiens]	Q92522
5,257387	6,331799	5,915064	6,342221	5,96026	7,055779	7,085819	7,130813	7,142075	6,989175	FALSK		1	+	CRVO_Control	2	6	2	1	419	0	2	0,00406818	0,009212944	1,119386005	0,511378112	FDPS	Farnesyl pyrophosphate synthase [OS=Homo sapiens]	P14324
6,166399	6,173398	5,73056	5,962362	5,973424	7,124703	7,081126	7,027798	7,086918	7,07053	FALSK		20	+	CRVO_Control	13	21	13	1	1216	0	13	9,57E-05	0,000826704	1,076986408	0,520654432	PLCB1	1-phosphatidylinositol 4,5-bisphosphate phosphodiesterase beta-1 [OS=Homo sapiens]	Q9NQ66-1
6,094851	6,256355	5,611084	5,91197	6,124976	7,092743	7,145142	7,118401	7,06607	6,968412	FALSK		5	+	CRVO_Control	3	19	3	1	227	0	3	0,000845222	0,002891911	1,078306389	0,508667928	BASP1	Brain acid soluble protein 1 [OS=Homo sapiens]	P80723
5,584267	6,054311	6,098501	6,019449	6,239961	7,153405	7,020163	7,083194	7,094223	7,040009	FALSK		3	+	CRVO_Control	2	9	2	1	88	0	2	0,001162523	0,00361536	1,078900814	0,506445691	ATP5J2	ATP synthase subunit f, mitochondrial [OS=Sus scrofa]	Q95339
6,406831	5,929045	5,553147	6,176838	5,868408	7,085896	6,972655	7,189869	7,065382	7,06608	FALSK		MT	+	CRVO_Control	2	4	2	1	459	0	2	0,002524141	0,006404966	1,089122677	0,503857182	ND4	NADH-ubiquinone oxidoreductase chain 4 [OS=Sus scrofa]	O79881
6,080775	6,01435	6,037012	5,975638	5,982441	6,992388	7,060119	7,177347	7,088397	7,067087	FALSK		5	+	CRVO_Control	26	181	8	1	780	23	26	1,21E-05	0,000517207	1,059024143	0,519119749	PFKM	ATP-dependent 6-phosphofructokinase, muscle type [OS=Sus scrofa]	Q2HYU2
6,109158	6,002236	5,904476	6,027905	6,059453	6,937226	7,208404	7,07735	6,99774	7,148175	FALSK			+	CRVO_Control	20	90	20	1	664	0	20	0,0001106	0,000888313	1,053133297	0,50888194	SDHA;LOC780433	Succinate dehydrogenase [ubiquinone] flavoprotein subunit, mitochondrial [OS=Sus scrofa]	Q0QF01
6,264366	6,124114	5,725667	5,985461	5,943029	7,031239	7,097109	7,068912	7,100231	7,078572	FALSK		2	+	CRVO_Control	14	49	3	1	593	10	14	0,000364946	0,001662874	1,0666852	0,509048905	BIN1	Myc box-dependent-interacting protein 1 [OS=Homo sapiens]	O00499
6,320681	5,954076	5,782123	6,03296	5,979342	7,086325	7,064998	7,038916	7,149574	7,029182	FALSK		2	+	CRVO_Control	5	27	5	1	338	0	5	0,000197043	0,001161724	1,059962654	0,509348449	SCAMP1;LOC106507159	Secretory carrier-associated membrane protein 1 [OS=Sus scrofa]	O77735
6,183522	6,015584	5,847779	6,020946	6,043181	7,083188	7,053409	7,087993	7,137531	7,00674	FALSK		3	+	CRVO_Control	17	172	17	1	334	0	17	6,02E-05	0,000677637	1,051569939	0,510592887	MDH1;LOC102163346	Malate dehydrogenase, cytoplasmic [OS=Sus scrofa]	P11708
5,705213	5,872753	6,13307	6,155817	6,211401	6,911057	6,86932	7,241105	7,120801	7,182654	FALSK		1;CHR_HSCHR1_1_CTG3	+	CRVO_Control	3	5	2	1	1416	1	3	2,36E-05	0,000519475	1,049336624	0,512654109	PLCH2	1-phosphatidylinositol 4,5-bisphosphate phosphodiesterase eta-2 [OS=Homo sapiens]	O75038
6,205537	6,143012	5,885291	5,981159	5,890137	7,128968	7,066613	7,197778	7,045207	6,904619	FALSK		6	+	CRVO_Control	4	12	4	1	202	0	4	0,000126441	0,000954855	1,047609901	0,505718353	FAM213B	Prostamide/prostaglandin F synthase [OS=Sus scrofa]	A9CQL8
6,19046	5,945005	5,884764	6,078869	6,017437	7,03054	7,134333	7,107715	7,055829	7,022838	FALSK		21	+	CRVO_Control	11	54	6	1	371	0	11	0,000122744	0,000938148	1,046943855	0,505538846	PCBP3	Poly(rC)-binding protein 3 [OS=Homo sapiens]	P57721-1
6,194474	6,042998	5,885084	6,076505	5,95186	7,035028	7,144484	7,083723	7,055276	7,032871	FALSK		8	+	CRVO_Control	14	50	14	1	382	0	14	6,89E-05	0,000709826	1,040091991	0,504680495	ATP6V1C1	V-type proton ATPase subunit C 1 [OS=Homo sapiens]	P21283
6,139028	6,013253	5,932113	6,098805	5,981634	7,031198	7,086768	7,081771	7,115625	7,033956	FALSK		22	+	CRVO_Control	11	95	11	1	226	0	11	1,63E-05	0,000498472	1,036897182	0,507731541	ATP6V1E1	V-type proton ATPase subunit E 1 [OS=Homo sapiens]	P36543
5,764706	6,073539	5,991725	6,149964	6,144466	6,99093	7,127217	7,135995	7,034146	7,05162	FALSK		16	+	CRVO_Control	2	6	2	1	412	0	2	9,47E-05	0,000823513	1,043101597	0,504843417	BCKDK	[3-methyl-2-oxobutanoate dehydrogenase [lipoamide]] kinase, mitochondrial [OS=Homo sapiens]	O14874
6,264837	6,163531	5,736008	5,989704	5,950214	7,0848	7,116456	7,079618	7,070902	6,990338	FALSK		3	+	CRVO_Control	11	32	6	1	926	2	11	0,000266494	0,001338119	1,04756422	0,502071576	DLG1	Isoform 2 of Disks large homolog 1 [OS=Homo sapiens]	Q12959-2
6,103349	6,028462	6,040542	6,046564	5,980689	6,92231	7,229676	7,105892	6,930029	7,126143	FALSK		4	+	CRVO_Control	2	8	2	1	169	0	2	0,000159139	0,001036593	1,022889233	0,493185868	LOC100524676;SDHC	Succinate dehydrogenase cytochrome b560 subunit, mitochondrial [OS=Sus scrofa]	D0VWV4
6,226894	6,085114	5,784137	6,065084	6,001802	7,092216	7,087038	7,090418	7,027315	7,038658	FALSK		18	+	CRVO_Control	10	31	9	1	327	0	10	0,000149838	0,001021647	1,034522724	0,498866152	MAPRE2	Microtubule-associated protein RP/EB family member 2 [OS=Homo sapiens]	Q15555
6,03508	6,075745	5,815843	6,043516	6,206899	7,05436	7,130943	7,058117	7,028807	7,058619	FALSK	Acetyl [N-Term]	14	+	CRVO_Control	7	45	3	1	208	4	7	8,21E-05	0,000755578	1,030752468	0,499617484	RTN1	Isoform RTN1-C of Reticulon-1 [OS=Homo sapiens]	Q16799-3
6,114217	6,071564	5,854025	5,954438	6,099383	6,926337	6,968392	7,107019	7,080826	7,208887	FALSK		3	+	CRVO_Control	3	5	3	1	1127	0	3	0,000208891	0,001194428	1,039566994	0,499635814	PLCL2	inactive phospholipase C-like protein 2 [OS=Homo sapiens]	Q9UPR0-1
6,367688	5,980115	5,840092	6,008068	5,972576	7,043301	7,104331	7,054695	7,069824	7,052439	FALSK		7	+	CRVO_Control	4	28	4	1	147	0	4	0,000372273	0,001680106	1,031210136	0,492754777	ATP6V1F	Isoform 2 of V-type proton ATPase subunit F [OS=Homo sapiens]	Q16864-2
6,290004	6,041018	5,871479	6,040001	5,951747	6,993774	7,084188	7,138008	6,986939	7,115824	FALSK		4	+	CRVO_Control	25	105	21	1	839	2	25	0,000449804	0,001894674	1,024897003	0,48879787	HSPA4L	Heat shock 70 kDa protein 4L [OS=Homo sapiens]	O95757
6,274986	6,128561	5,556115	5,967741	6,175713	7,153269	7,095993	6,776044	7,032372	7,220636	FALSK		11	+	CRVO_Control	9	38	8	1	418	0	9	5,30E-05	0,000641606	1,035039425	0,503252166	ARRB1	Beta-arrestin-1 [OS=Homo sapiens]	P49407-1
5,653771	5,392076	6,4263	6,276555	6,017468	7,056509	7,255939	6,930866	7,032841	6,983616	FALSK		20			7	14	7	1	525	0	7	0,01040994	0,019120195	1,098719978	0,490188049	SLC32A1	vesicular inhibitory amino acid transporter [OS=Homo sapiens]	Q9H598
6,134028	6,20065	5,843252	6,153601	5,871554	7,144025	7,216566	7,135243	7,004958	6,777333	FALSK		11	+	CRVO_Control	2	7	2	1	166	0	2	0,000181556	0,001115525	1,015007973	0,488929635	SDHAF2	Succinate dehydrogenase assembly factor 2, mitochondrial [OS=Homo sapiens]	Q9NX18
6,02438	6,139418	6,066278	6,11298	5,884557	7,018347	7,193625	7,011226	7,079463	7,003349	FALSK		21	+	CRVO_Control	9	23	9	1	837	0	9	5,61E-06	0,000506201	1,015679359	0,499932787	NCAM2	Neural cell adhesion molecule 2 [OS=Homo sapiens]	O15394
6,019963	6,111648	5,906873	6,067162	6,134308	7,115659	7,087796	7,152843	7,07519	6,864802	FALSK		20	+	CRVO_Control	3	6	3	1	1194	0	3	0,000277398	0,001378264	1,01126709	0,485171964	PLCB4	Isoform 3 of 1-phosphatidylinositol 4,5-bisphosphate phosphodiesterase beta-4 [OS=Homo sapiens]	Q15147-4
5,926231	6,336997	5,720019	6,18183	5,980962	7,069757	6,958813	6,997898	7,167164	7,102105	FALSK		7	+	CRVO_Control	6	11	6	1	645	0	6	0,000778966	0,002736849	1,02993927	0,487641656	DYNC1I1	cytoplasmic dynein 1 intermediate chain 1 [OS=Homo sapiens]	O14576-1
5,773792	6,293328	5,947968	6,087102	6,070591	6,972744	7,003666	7,16463	7,098565	7,048595	FALSK		6	+	CRVO_Control	2	4	2	1	559	0	2	0,000368204	0,001667698	1,023083782	0,489103068	WASF1	wiskott-Aldrich syndrome protein family member 1 [OS=Homo sapiens]	Q92558
5,827398	5,779999	6,289531	6,147346	6,168754	7,031	7,109206	7,015118	6,992013	7,142991	FALSK		12	+	CRVO_Control	6	17	5	1	394	0	6	0,00080679	0,002811158	1,015460014	0,480914432	PRMT8	Protein arginine n-methyltransferase 8 [OS=Homo sapiens]	Q9NR22
5,974578	5,953671	6,067922	6,131782	6,142929	7,153236	7,038753	7,11574	7,071692	6,897956	FALSK		1	+	CRVO_Control	7	13	7	1	415	0	7	0,000159103	0,001038142	1,001299	0,483141176	KCNAB2	Isoform 3 of Voltage-gated potassium channel subunit beta-2 [OS=Homo sapiens]	Q13303-3
5,945467	6,037807	5,805826	6,246595	6,187846	7,168672	6,919412	7,011747	7,196937	6,964988	FALSK		7	+	CRVO_Control	2	4	2	1	648	0	2	0,000345473	0,001591361	1,007642937	0,482378602	AVL9	Late secretory pathway protein AVL9 homolog [OS=Homo sapiens]	Q8NBF6-1
6,1632	6,144381	5,914425	5,990091	6,066555	7,04815	7,087038	7,147157	6,962999	7,033299	FALSK			+	CRVO_Control	8	30	8	1	322	0	8	7,70E-05	0,000741218	0,999998093	0,485384143	PDXK	Pyridoxal kinase [OS=Sus scrofa]	O46560
6,469856	6,282979	5,51074	5,922435	5,931861	7,087911	6,99601	7,100123	7,058533	7,043297	FALSK		14	+	CRVO_Control	2	4	2	1	319	0	2	0,003971473	0,009042554	1,03360033	0,475582599	NUBPL	Iron-sulfur protein NUBPL [OS=Homo sapiens]	Q8TB37-1
6,32838	5,899892	5,937952	6,181293	5,790563	7,156947	6,75342	7,269579	7,180228	6,824435	FALSK		2	+	CRVO_Control	3	4	3	1	386	0	3	0,000358032	0,0016353	1,009306145	0,48295144	HIBCH	3-hydroxyisobutyryl-CoA hydrolase, mitochondrial [OS=Homo sapiens]	Q6NVY1
6,118559	6,104323	5,953028	6,002956	6,125735	6,947184	7,055222	7,022284	6,903166	7,313002	FALSK		10	+	CRVO_Control	2	4	2	1	410	0	2	0,000100276	0,000848542	0,987251282	0,478422027	COX15	Cytochrome c oxidase assembly protein COX15 homolog [OS=Homo sapiens]	Q7KZN9
6,57427	6,103049	5,822086	5,756082	5,858075	7,145868	7,101213	7,087894	7,061708	6,860766	FALSK		17	+	CRVO_Control	2	3	2	1	204	0	2	0,001422269	0,004228879	1,028777599	0,482757144	PPP1R1B	Protein phosphatase 1 regulatory subunit 1B [OS=Homo sapiens]	Q9UD71-1
5,640968	6,175924	5,93546	6,209454	6,268659	7,123086	6,995484	7,128252	7,087463	6,937815	FALSK		17	+	CRVO_Control	3	3	3	1	314	0	3	0,002303884	0,006023465	1,008327389	0,469869708	GDPD1	Glycerophosphodiester phosphodiesterase domain-containing protein 1 [OS=Homo sapiens]	Q8N9F7
6,178321	6,231629	5,775758	6,022689	6,067098	7,103812	7,133636	6,960001	7,038365	7,037982	FALSK		22	+	CRVO_Control	5	8	5	1	475	0	5	3,72E-05	0,000590314	0,999660587	0,487616405	ATXN10	Ataxin-10 [OS=Homo sapiens]	Q9UBB4-1
5,995679	6,059297	5,966204	6,22285	6,057213	6,955898	6,993739	7,073558	7,059556	7,186366	FALSK		19	+	CRVO_Control	7	32	5	1	248	1	7	5,53E-05	0,000650887	0,993574905	0,483486708	RAB4B	Isoform 2 of Ras-related protein Rab-4B [OS=Homo sapiens]	P61018-2
6,491821	6,024341	5,763836	6,009795	5,85808	7,009353	7,104119	7,182514	6,930668	7,02508	FALSK		9	+	CRVO_Control	4	5	4	1	927	0	4	0,002400273	0,006194307	1,020772266	0,4749097	GBA2	Non-lysosomal glucosylceramidase [OS=Homo sapiens]	Q9HCG7
6,384306	6,055542	5,796415	5,939301	6,086284	7,121533	7,140546	6,993106	6,921738	7,079473	FALSK		11	+	CRVO_Control	5	10	5	1	574	0	5	0,000192834	0,001149422	0,998909378	0,481186149	SLC1A2	excitatory amino acid transporter 2 [OS=Homo sapiens]	P43004-1
6,263299	6,154738	5,906873	6,075737	5,91169	6,997148	7,032306	7,094522	7,103753	7,036128	FALSK		X	+	CRVO_Control	16	101	8	1	447	0	16	0,00027893	0,001382255	0,990304089	0,475486919	GDI1	Rab GDP dissociation inhibitor alpha [OS=Homo sapiens]	P31150
6,36396	5,852133	5,987281	6,095664	5,995482	6,977714	7,111572	7,080016	6,979513	7,110992	FALSK		2	+	CRVO_Control	4	13	4	1	164	0	4	0,000899176	0,002998043	0,993057442	0,470157565	CNRIP1	CB1 cannabinoid receptor-interacting protein 1 [OS=Homo sapiens]	Q96F85-1
6,222113	6,104471	5,886702	6,090436	6,022284	7,020672	7,033936	7,060463	7,03615	7,110991	FALSK		18	+	CRVO_Control	15	26	15	1	1490	0	15	0,000112778	0,000896311	0,987241268	0,477972177	WDR7	WD repeat-containing protein 7 [OS=Homo sapiens]	Q9Y4E6-1
6,226708	6,227656	5,708673	6,127221	6,00439	7,079463	7,016793	7,039467	7,073018	7,054065	FALSK		16	+	CRVO_Control	21	413	6	1	450	4	21	0,000473589	0,001960017	0,993631554	0,474270926	TUBB3	tubulin beta-3 chain [OS=Homo sapiens]	Q13509
6,243083	6,130313	5,978225	5,971543	6,015687	7,088351	6,983531	7,104819	6,955292	7,122528	FALSK		10	+	CRVO_Control	10	31	10	1	182	0	10	8,07E-05	0,000747963	0,983133984	0,477271754	ARL3	ADP-ribosylation factor-like protein 3 [OS=Homo sapiens]	P36405
6,342103	5,985102	5,691857	6,135508	6,111198	7,153214	6,997177	7,014216	7,031124	7,057928	FALSK		12	+	CRVO_Control	3	4	3	1	248	0	3	0,000339007	0,001567289	0,997578144	0,477860849	MLF2	Myeloid leukemia factor 2 [OS=Homo sapiens]	Q15773
6,066738	6,058873	6,039806	6,05311	6,106517	7,043845	6,967041	6,969601	7,112405	7,139739	FALSK		5	+	CRVO_Control	24	94	2	1	1220	0	24	4,53E-06	0,000505522	0,981517315	0,483749004	ATP2B1	Plasma membrane calcium-transporting ATPase 1 [OS=Sus scrofa]	P23220
6,262094	6,075737	5,878434	6,133404	5,982641	7,058545	6,990826	7,098364	7,009717	7,088897	FALSK		3	+	CRVO_Control	2	4	2	1	155	0	2	0,000229995	0,001247371	0,982807827	0,472926327	CHCHD4	Isoform 2 of Mitochondrial intermembrane space import and assembly protein 40 [OS=Homo sapiens]	Q8N4Q1-2
6,104434	6,177598	6,009191	5,938462	6,060896	6,798288	6,932453	7,142241	7,192288	7,121998	FALSK		4	+	CRVO_Control	16	60	2	1	607	0	16	0,000848872	0,00290178	0,979337406	0,464364546	RAP1GDS1	Isoform 4 of Rap1 GTPase-GDP dissociation stimulator 1 [OS=Homo sapiens]	P52306-4
6,153222	6,085239	5,8996	6,139306	6,072406	7,083769	7,100646	7,064451	7,039195	6,955724	FALSK		10	+	CRVO_Control	10	29	5	1	525	0	10	4,61E-05	0,000615817	0,97880249	0,477050017	PPP3CB	Isoform 4 of Serine/threonine-protein phosphatase 2B catalytic subunit beta isoform [OS=Homo sapiens]	P16298-4
6,071002	6,117738	5,975724	6,139538	6,062482	6,894634	7,238256	6,885046	7,021616	7,175218	FALSK		11	+	CRVO_Control	3	7	3	1	83	0	3	9,51E-05	0,000824856	0,969656754	0,470344315	TIMM8B	mitochondrial import inner membrane translocase subunit Tim8 B [OS=Homo sapiens]	Q9Y5J9
6,485427	6,037821	5,88996	5,669594	6,169925	6,908092	7,012345	7,093814	7,068241	7,153805	FALSK		13	+	CRVO_Control	2	2	2	1	760	0	2	0,003662586	0,008523551	0,99671402	0,460695163	TMTC4	Isoform 3 of Transmembrane and TPR repeat-containing protein 4 [OS=Homo sapiens]	Q5T4D3-3
5,827819	6,456149	5,981853	6,189825	5,842979	7,829723	6,446256	6,380245	7,201634	6,866661	FALSK		6			2	2	2	1	2289	0	2	0,060127436	0,083495644	0,885178852	0,378181733	ARID1B	Isoform 3 of AT-rich interactive domain-containing protein 1B [OS=Homo sapiens]	Q8NFD5-3
6,057047	5,974943	5,699059	6,311893	6,26276	6,97585	6,990235	6,794224	7,022352	7,38873	FALSK		20	+	CRVO_Control	10	44	2	1	206	0	10	0,000201709	0,001172822	0,973137856	0,46902154	SNAP25	Isoform 2 of Synaptosomal-associated protein 25 [OS=Homo sapiens]	P60880-2
5,901076	6,113918	5,951799	6,268233	6,122408	6,875563	6,937495	7,120274	7,144289	7,137346	FALSK		18	+	CRVO_Control	2	3	2	1	632	0	2	8,44E-05	0,000767132	0,9715065	0,471635155	CPR2;TBRG4	Protein TBRG4 [OS=Sus scrofa]	Q7YS91
6,007524	6,069216	5,956809	5,95961	6,366542	7,039914	7,123003	7,04381	6,948246	7,074244	FALSK		6	+	CRVO_Control	7	17	3	1	280	4	7	0,00014161	0,001001572	0,973903275	0,470840148	SDHB	Succinate dehydrogenase [ubiquinone] iron-sulfur subunit, mitochondrial [OS=Sus scrofa]	Q007T0
6,195031	6,110598	5,892318	6,133926	6,071462	6,963563	7,023462	7,089993	7,05595	7,089507	FALSK		8	+	CRVO_Control	8	16	7	1	314	1	8	0,000168113	0,001071122	0,963828182	0,465448974	FAM82B;RMDN1	regulator of microtubule dynamics protein 1 [OS=Homo sapiens]	Q96DB5
6,523988	6,167868	5,754019	5,936107	5,902662	6,881407	7,044825	7,159768	7,025862	7,097447	FALSK		17			3	5	3	1	521	0	3	0,005270702	0,011150241	0,984933186	0,452106593	VEZF1	Vascular endothelial zinc finger 1 [OS=Homo sapiens]	Q14119
6,063638	6,158854	5,99689	6,031251	6,144468	7,02809	7,10633	7,021957	6,985829	7,067782	FALSK		13	+	CRVO_Control	5	9	5	1	728	0	5	5,74E-07	0,000435043	0,962977982	0,477444328	PCCA	Propionyl-CoA carboxylase alpha chain, mitochondrial [OS=Homo sapiens]	P05165-1
6,294526	6,076687	5,867354	6,088476	6,075366	7,069283	7,036616	6,992965	7,040226	7,081594	FALSK		18	+	CRVO_Control	10	32	10	1	312	0	10	6,94E-05	0,000707061	0,963654995	0,468586271	NAPG	Gamma-soluble NSF attachment protein [OS=Homo sapiens]	Q99747
6,206319	6,04426	5,613119	6,300858	6,175464	7,063886	7,157831	6,746788	6,899054	7,289698	FALSK		19	+	CRVO_Control	6	17	6	1	361	0	6	0,000772254	0,002718306	0,96344738	0,457779346	TOMM40	Mitochondrial import receptor subunit TOM40 homolog [OS=Homo sapiens]	O96008
6,381872	6,154559	5,855317	5,990911	6,005205	7,142962	6,974521	7,074548	7,020586	6,99829	FALSK		11	+	CRVO_Control	5	36	5	1	214	0	5	0,000289058	0,00141032	0,964608669	0,46346271	PRDX5	Peroxiredoxin-5, mitochondrial [OS=Homo sapiens]	P30044-1
6,249454	6,173257	5,824453	6,117313	5,995796	7,085769	7,055455	7,038312	7,081624	6,941415	FALSK		14	+	CRVO_Control	22	47	22	1	769	0	22	0,000121407	0,000935473	0,968460369	0,468886853	GPHN	Isoform 2 of Gephyrin [OS=Homo sapiens]	Q9NQX3-2
6,181761	6,184799	5,874034	6,152763	6,027587	7,013452	7,048067	7,018846	7,098026	7,036143	FALSK		3	+	CRVO_Control	8	11	3	1	1896	5	8	6,79E-05	0,000707197	0,958718109	0,466320591	PLXNA1	Plexin-A1 [OS=Homo sapiens]	Q9UIW2
6,159401	5,922412	6,052914	6,035542	6,250122	7,154646	6,894776	7,121518	7,066628	6,961056	FALSK		12	+	CRVO_Control	7	29	7	1	459	0	7	0,00011232	0,000894546	0,95564661	0,463160206	FKBP4	Peptidyl-prolyl cis-trans isomerase FKBP4 [OS=Homo sapiens]	Q02790
5,916237	6,020103	6,17106	6,112248	6,209796	7,07408	6,985419	7,083181	7,102214	6,961248	FALSK		6	+	CRVO_Control	3	8	3	1	108	0	3	0,000128346	0,000954041	0,955339527	0,462527419	ATPIF1	ATPase inhibitor, mitochondrial [OS=Sus scrofa]	Q29307
5,97728	6,32553	5,736063	6,063934	6,292782	6,745506	7,388017	6,652486	7	7,274261	FALSK		12	+	CRVO_Control	2	2	2	1	253	0	2	4,22E-05	0,000605345	0,932936287	0,455480785	FGFR1OP2	FGFR1 oncogene partner 2 [OS=Homo sapiens]	Q9NVK5-1
6,307025	6,104775	5,861404	6,017437	6,127579	7,071526	7,100583	6,948887	6,999388	7,068406	FALSK		2	+	CRVO_Control	10	31	10	1	313	0	10	5,65E-05	0,000652641	0,954113674	0,464714503	PRKRA	Interferon-inducible double-stranded RNA-dependent protein kinase activator A [OS=Homo sapiens]	O75569-1
6,30544	6,108506	5,804405	6,19348	6,02014	6,982404	7,09948	7,262794	7,011422	6,793923	FALSK		20	+	CRVO_Control	2	4	2	1	662	0	2	0,002417835	0,006235383	0,943610477	0,441273721	GGT7	Gamma-glutamyltransferase 7 [OS=Homo sapiens]	Q9UJ14-1
6,091396	6,021236	6,030078	6,089483	6,245927	7,138057	7,060255	7,041636	7,047643	6,893604	FALSK		6	+	CRVO_Control	3	25	2	1	164	0	3	0,000230885	0,001245073	0,940614796	0,453338798	SRSF3	Serine/arginine-rich splicing factor 3 [OS=Homo sapiens]	P84103
5,884954	5,992081	6,051827	6,254541	6,209462	7,155787	7,065141	6,820644	7,045623	7,07696	FALSK		2	+	CRVO_Control	4	8	3	1	532	0	4	0,000566518	0,002216378	0,95425787	0,45535756	SLC1A4	neutral amino acid transporter A [OS=Homo sapiens]	P43007-1
5,968801	6,232374	5,748462	6,132846	6,297338	7,006902	7,151551	7,005491	6,965618	7,03778	FALSK		6	+	CRVO_Control	2	5	2	1	392	0	2	0,000433296	0,0018645	0,957504368	0,458236544	BCKDHB	2-oxoisovalerate dehydrogenase subunit beta, mitochondrial [OS=Homo sapiens]	P21953
6,247608	6,099836	5,939801	6,164831	6,006975	7,048941	7,121621	7,069309	7,027798	6,908681	FALSK		19	+	CRVO_Control	9	15	6	1	492	2	9	8,83E-05	0,000794979	0,943459606	0,458254912	NOVA2	RNA-binding protein Nova-2 [OS=Homo sapiens]	Q9UNW9
6,016354	5,849365	6,19396	6,209794	6,124894	7,040006	7,039665	6,999412	7,019034	7,072584	FALSK		16	+	CRVO_Control	3	7	3	1	287	0	3	0,000186736	0,001132667	0,955266762	0,46103122	ROGDI	Protein rogdi homolog [OS=Homo sapiens]	Q9GZN7
6,193178	6,233432	5,910447	6,122231	6,023604	6,994714	7,057881	7,044229	7,042654	7,042724	FALSK		8	+	CRVO_Control	16	80	16	1	511	0	16	0,000109943	0,000888685	0,939861965	0,45581554	ATP6V1B2	V-type proton ATPase subunit B, brain isoform [OS=Homo sapiens]	P21281
6,368053	5,963207	6,013927	6,053442	6,072402	7,075204	7,038228	7,084051	6,990944	6,991511	FALSK		1	+	CRVO_Control	9	45	9	1	194	0	9	0,000148732	0,001019611	0,94178133	0,455624831	LOC100521423;AK1	Adenylate kinase isoenzyme 1 [OS=Sus scrofa]	P00571
6,178494	5,908072	6,252769	5,886953	6,181543	7,074018	7,011192	7,09449	6,988529	6,996404	FALSK		1	+	CRVO_Control	5	18	4	1	191	0	5	0,000112048	0,000896147	0,95136013	0,461154866	HPCAL4	Hippocalcin-like protein 4 [OS=Homo sapiens]	Q9UM19
5,983372	5,854973	6,072428	6,366951	6,13672	6,975437	6,944847	7,007523	6,999772	7,205824	FALSK		8	+	CRVO_Control	3	6	3	1	530	0	3	0,000333293	0,001552228	0,943791771	0,453199536	EFHA2;MICU3	Calcium uptake protein 3, mitochondrial [OS=Homo sapiens]	Q86XE3
6,143638	6,219169	5,974988	6,151778	6,035624	6,948367	7,081084	6,96463	7,014578	7,150763	FALSK		14	+	CRVO_Control	2	2	2	1	1804	0	2	7,78E-05	0,000739433	0,926845074	0,450809147	SIPA1L1	Signal-induced proliferation-associated 1-like protein 1 [OS=Homo sapiens]	O43166-1
6,268182	6,445246	5,846643	5,91963	5,939194	6,966646	7,026628	6,993778	7,196735	6,962871	FALSK		X	+	CRVO_Control	9	41	3	1	580	0	9	0,002030608	0,005510404	0,945552731	0,443431907	PAK3	Isoform 3 of Serine/threonine-protein kinase PAK 3 [OS=Homo sapiens]	O75914-3
6,419254	6,14054	5,988763	6,062303	5,866872	7,065895	7,253784	6,996551	6,982292	6,817111	FALSK		16	+	CRVO_Control	4	8	4	1	505	0	4	0,00028052	0,001384703	0,927580166	0,446469433	FTO	alpha-ketoglutarate-dependent dioxygenase FTO [OS=Homo sapiens]	Q9C0B1-1
6,239325	6,178856	5,938404	6,132409	6,03774	7,054551	7,047119	7,099079	6,974521	6,982755	FALSK		19	+	CRVO_Control	4	10	4	1	308	0	4	0,000120538	0,000930674	0,926258373	0,449099335	TECR	Very-long-chain enoyl-CoA reductase [OS=Homo sapiens]	Q9NZ01-1
5,867964	5,804257	6,000204	6,227085	6,526834	7,293306	6,979283	7,177033	7,065441	6,526691	FALSK		14			8	16	7	1	612	1	8	0,02069542	0,033571389	0,923082066	0,410447885	CPNE6	Isoform 2 of Copine-6 [OS=Homo sapiens]	O95741-2
5,478754	6,186841	5,384473	6,387953	6,680715	6,793659	7,006745	7,608615	7,112995	6,33981	FALSK		22			2	27	2	1	194	0	2	0,085661533	0,113745314	0,948617935	0,392353271	H1F0	Histone H1.0 [OS=Homo sapiens]	P07305
6,312009	6,062845	5,835151	6,06967	6,230371	7,072342	7,105197	6,852876	6,884395	7,209397	FALSK		4	+	CRVO_Control	8	14	8	1	317	0	8	8,40E-05	0,000765658	0,922832012	0,448672158	MTX1	Metaxin-1 [OS=Sus scrofa]	Q27HK4
6,687541	6,105774	5,639312	5,837447	5,80293	6,996093	7,231966	6,975038	6,98171	6,916305	FALSK		4			2	5	2	1	237	0	2	0,004926446	0,010605427	1,005621433	0,461522942	CBR4	Carbonyl reductase family member 4 [OS=Homo sapiens]	Q8N4T8
6,274974	6,191794	5,879095	6,09271	6,098805	6,936043	6,973457	7,084263	6,964618	7,180353	FALSK		3	+	CRVO_Control	4	10	4	1	144	0	4	0,000744369	0,002677327	0,920271111	0,438438744	CCDC58	coiled-coil domain-containing protein 58 [OS=Homo sapiens]	Q4VC31
6,24216	6,145655	5,983339	6,078685	6,105025	6,96493	7,101822	7,051469	6,95766	7,068912	FALSK		12	+	CRVO_Control	3	6	3	1	167	0	3	8,90E-05	0,000797256	0,91798563	0,446202002	ISCU	Iron-sulfur cluster assembly enzyme ISCU, mitochondrial [OS=Homo sapiens]	Q9H1K1
6,292749	6,112265	5,799617	6,178872	6,149518	6,975778	7,065413	6,949974	6,934278	7,202044	FALSK		11	+	CRVO_Control	4	11	4	1	303	0	4	0,000475768	0,001960476	0,918893433	0,440077866	MTCH2	Mitochondrial carrier homolog 2 [OS=Homo sapiens]	Q9Y6C9
6,166907	6,186571	5,847507	6,227741	6,121855	7,005513	7,04369	7,01846	7,025666	7,051826	FALSK		7	+	CRVO_Control	4	15	4	1	312	0	4	0,000159352	0,001036199	0,918914795	0,444663383	PURB	Transcriptional activator protein Pur-beta [OS=Homo sapiens]	Q96QR8
5,77463	6,214817	6,031543	6,250381	6,24259	7,026678	7,042004	7,025202	7,031745	7,016694	FALSK		16	+	CRVO_Control	4	12	4	1	321	0	4	0,00052002	0,002095001	0,92567234	0,442750671	PGP	glycerol-3-phosphate phosphatase [OS=Homo sapiens]	A6NDG6
6,264354	6,460582	5,840384	5,88384	6,030115	7,032825	7,256822	6,90583	6,932495	6,986665	FALSK		14	+	CRVO_Control	11	30	11	1	535	0	11	0,000117095	0,000913387	0,927072239	0,449581865	ALDH6A1	Methylmalonate-semialdehyde dehydrogenase [acylating], mitochondrial [OS=Homo sapiens]	Q02252
6,045374	6,082149	6,296135	6,166669	5,93096	7,124944	6,787689	7,134198	7,010406	7,020145	FALSK		X	+	CRVO_Control	2	4	2	1	77	0	2	0,000262088	0,001323002	0,91121912	0,439161301	TSC22D3	TSC22 domain family protein 3 [OS=Sus scrofa]	P80220
6,035582	6,196444	5,884746	6,104184	6,342829	7,001671	6,927177	7,041999	7,101653	7,052523	FALSK		2	+	CRVO_Control	6	19	4	1	196	0	6	0,000425292	0,001838406	0,912247849	0,437549646	RHOB	Rho-related GTP-binding protein RhoB [OS=Homo sapiens]	P62745
6,08534	6,380245	5,786596	6,1918	6,104337	6,942514	7,083213	6,973841	6,981853	7,140574	FALSK		12	+	CRVO_Control	4	5	4	1	1128	0	4	0,000470733	0,001950326	0,914735699	0,438220563	GRIP1	Glutamate receptor-interacting protein 1 [OS=Homo sapiens]	Q9Y3R0
6,155511	6,124106	5,950565	6,223908	6,134308	7,031431	6,984112	7,047369	7,053642	7,011778	FALSK		19	+	CRVO_Control	9	14	7	1	1194	2	9	4,59E-05	0,000617238	0,907986641	0,443357692	PPFIA3	Liprin-alpha-3 [OS=Homo sapiens]	O75145-1
6,118053	6,351741	5,791203	6,087238	6,187998	6,767742	7,068906	7,049937	7,062841	7,147646	FALSK		11	+	CRVO_Control	2	4	2	1	192	0	2	0,001076748	0,003413002	0,912167835	0,432715828	MRPL11	39S ribosomal protein L11, mitochondrial [OS=Homo sapiens]	Q9Y3B7-1
6,135673	6,167116	5,982795	6,163866	6,160784	6,971907	7,006621	7,055249	7,026241	7,062178	FALSK		19	+	CRVO_Control	13	33	13	1	959	0	13	3,36E-05	0,000579249	0,902392387	0,441466964	LONP1	Lon protease homolog, mitochondrial [OS=Homo sapiens]	P36776
6,274652	6,23408	5,207396	6,138946	6,23667	7,350383	6,936043	6,911845	6,687442	7,080546	FALSK		10			2	3	2	1	1024	0	2	0,008480914	0,016270822	0,974903297	0,442740058	PSD	PH and SEC7 domain-containing protein 1 [OS=Homo sapiens]	A5PKW4
6,003293	6,361065	5,900826	6,031192	6,275433	7,063387	7,065365	7,015584	7,04426	6,924576	FALSK		14	+	CRVO_Control	11	26	11	1	802	0	11	0,000704186	0,002566892	0,908272457	0,433276919	RPS6KA5	Ribosomal protein S6 kinase alpha-5 [OS=Homo sapiens]	O75582-1
6,121587	6,286767	5,880069	6,030885	6,233191	7,114557	7,01122	7,056134	6,940403	6,961822	FALSK		2	+	CRVO_Control	2	3	2	1	441	0	2	0,000440706	0,001883559	0,906327343	0,434663014	NDUFAF7	Protein arginine methyltransferase NDUFAF7, mitochondrial [OS=Homo sapiens]	Q7L592
6,276599	6,178905	5,716949	6,241261	6,170884	6,985823	7,067005	6,705972	7,174354	7,130277	FALSK		1	+	CRVO_Control	7	18	7	1	594	0	7	5,48E-05	0,000649283	0,895766354	0,437066859	GLMN	Glomulin [OS=Homo sapiens]	Q92990
6,094758	6,220344	5,972224	6,152193	6,159963	6,787188	7,167154	6,88548	7,23302	6,942543	FALSK		X	+	CRVO_Control	3	4	3	1	901	0	3	0,000194446	0,001155399	0,883180714	0,42721937	OCRL	Inositol polyphosphate 5-phosphatase OCRL-1 [OS=Homo sapiens]	Q01968-1
6,119933	6,300502	6,035652	5,923388	6,244814	7,001671	6,911838	7,115213	7,015118	7,050476	FALSK		19	+	CRVO_Control	5	10	2	1	686	3	5	0,000572494	0,002230548	0,894005299	0,427788804	RHPN2	Rhophilin-2 [OS=Homo sapiens]	Q8IUC4
6,245656	6,12819	5,994225	6,128749	6,148229	7,059057	7,022892	6,962876	6,943679	7,10567	FALSK		9	+	CRVO_Control	3	6	3	1	163	0	3	1,17E-05	0,000523805	0,889825249	0,437612998	HINT2	Histidine triad nucleotide-binding protein 2, mitochondrial [OS=Homo sapiens]	Q9BX68
6,03105	6,034575	6,223908	6,094449	6,261984	6,82654	6,973658	7,175362	6,925992	7,167646	FALSK		1;CHR_HSCHR1_1_CTG3	+	CRVO_Control	8	17	8	1	773	0	8	8,44E-06	0,000470515	0,884646034	0,435673276	PANK4	pantothenate kinase 4 [OS=Homo sapiens]	Q9NVE7
6,283948	6,159303	5,940615	6,194833	6,057953	6,971395	7,005699	7,061835	7,041857	7,014652	FALSK		15	+	CRVO_Control	40	89	37	1	1855	3	40	0,000239633	0,001274121	0,891757584	0,430457811	MYO5A	Unconventional myosin-Va [OS=Homo sapiens]	Q9Y4I1-1
6,28403	6,068199	6,045701	6,115244	6,111661	6,989061	7,101722	7,034401	6,955813	7,006324	FALSK		5;CHR_HSCHR5_2_CTG1_1	+	CRVO_Control	2	7	2	1	103	0	2	0,000103176	0,000863443	0,892497063	0,433698615	MRPS36	28S ribosomal protein S36, mitochondrial [OS=Homo sapiens]	P82909
6,259425	6,373961	5,715856	6,215369	5,970696	6,943277	6,805676	7,059718	7,12359	7,129281	FALSK		19			2	3	2	1	456	0	2	0,005117235	0,010892441	0,905246925	0,418560858	TIMM50	Isoform 2 of Mitochondrial import inner membrane translocase subunit TIM50 [OS=Homo sapiens]	Q3ZCQ8-2
6,363928	6,044858	5,948998	6,197604	6,073977	6,89914	6,985158	7,022666	7,057727	7,12068	FALSK		5	+	CRVO_Control	3	6	3	1	203	0	3	0,000774678	0,00272431	0,891201496	0,42502016	RAB24	Ras-related protein Rab-24 [OS=Homo sapiens]	Q969Q5
6,012293	6,02554	5,956295	6,430398	6,222466	7,028297	6,997742	6,902674	6,991519	7,14834	FALSK			+	CRVO_Control	15	42	15	1	616	0	15	0,000423025	0,00183909	0,884316158	0,424705092	SCG2	Secretogranin-2 [OS=Sus scrofa]	Q5FZP5
6,174419	6,229173	5,960794	6,251858	6,018636	6,960366	7,109333	7,046298	6,993185	6,952388	FALSK	Acetyl [N-Term]	12	+	CRVO_Control	3	6	3	1	548	0	3	0,000126352	0,000956087	0,88533802	0,429684381	SVOP	Synaptic vesicle 2-related protein [OS=Homo sapiens]	Q8N4V2
5,768184	6,114783	6,066089	6,539159	6,118941	7,056367	7,125155	7,092757	6,88996	6,893605	FALSK		1			2	5	2	1	798	0	2	0,004822184	0,01045818	0,890137482	0,412589456	TCEB3	Transcription elongation factor B polypeptide 3 [OS=Homo sapiens]	Q14241
6,046578	6,510962	5,560715	6,211401	6,224967	7,111657	7,035624	6,953032	7,09487	6,864186	FALSK		11	+	CRVO_Control	2	3	2	1	416	0	2	0,004331712	0,009637041	0,900949192	0,418127713	HEPACAM	Hepatocyte cell adhesion molecule [OS=Homo sapiens]	Q14CZ8-1
6,145626	6,09998	5,990505	6,139612	6,284928	7,026251	6,910702	7,024938	7,092032	7,000133	FALSK		18	+	CRVO_Control	3	5	3	1	312	0	3	9,13E-05	0,000807183	0,878680801	0,427530687	RPRD1A	Regulation of nuclear pre-mRNA domain-containing protein 1A [OS=Homo sapiens]	Q96P16-1
6,220702	5,99436	6,306707	6,061915	5,983449	7,000895	7,011324	6,84907	7,032878	7,142828	FALSK		3	+	CRVO_Control	3	4	3	1	770	0	3	0,001113546	0,003500375	0,893972301	0,424329668	GFM1	Isoform 2 of Elongation factor G, mitochondrial [OS=Homo sapiens]	Q96RP9-2
6,316675	5,996189	6,037917	6,25358	6,098032	7,013271	7,015642	7,0184	7,011668	7,006694	FALSK		X	+	CRVO_Control	4	8	4	1	485	0	4	0,000154424	0,001034312	0,872656536	0,423067683	WDR13	WD repeat-containing protein 13 [OS=Homo sapiens]	Q9H1Z4
6,720927	5,883689	5,957043	5,997813	5,988668	7,039129	6,903853	6,910061	7,047668	7,146077	FALSK		17	+	CRVO_Control	4	10	4	1	516	0	4	0,003799456	0,008761399	0,899729347	0,418659288	FSCN2	Isoform 2 of Fascin-2 [OS=Homo sapiens]	O14926-2
6,193233	5,914092	6,237977	6,17553	6,186841	6,952289	6,988555	7,072305	6,90202	7,131661	FALSK		5	+	CRVO_Control	11	20	11	1	890	0	11	0,000169726	0,001079584	0,867831516	0,420489978	HCN1	Potassium/sodium hyperpolarization-activated cyclic nucleotide-gated channel 1 [OS=Homo sapiens]	O60741
6,051808	6,285344	6,042046	6,102085	6,241261	7,005618	7,014406	6,981263	7,025134	7,032712	FALSK		4	+	CRVO_Control	35	93	30	1	3957	5	35	4,30E-05	0,000601183	0,867317867	0,424101733	ANK2	Ankyrin-2 [OS=Homo sapiens]	Q01484
6,243844	6,249614	5,998985	6,123063	6,109206	7,066627	6,986589	6,899761	7,097455	7,001111	FALSK		20	+	CRVO_Control	24	84	16	1	843	2	24	2,72E-05	0,000518983	0,865366173	0,424180656	PYGB	Glycogen phosphorylase, brain form [OS=Homo sapiens]	P11216
6,063934	6,456149	5,69488	6,114783	6,305606	7,005625	6,965784	7,011227	7,05745	7,015694	FALSK		10	+	CRVO_Control	3	4	3	1	412	0	3	0,002805	0,006954711	0,884085464	0,414106332	INPP5A	Type I inositol 1,4,5-trisphosphate 5-phosphatase [OS=Homo sapiens]	Q14642
5,902072	6,085762	6,204245	6,258168	6,257524	6,869045	7,083694	6,871844	7,072313	7,135292	FALSK		13	+	CRVO_Control	14	31	14	1	768	0	14	0,000126591	0,00095031	0,864883709	0,420036083	TFRC	Transferrin receptor protein 1 [OS=Sus scrofa]	Q8HZV3
6,252628	6,48891	5,764134	6,097601	6,036371	7,117807	7,018922	6,787225	7,122836	6,98139	FALSK		19	+	CRVO_Control	8	16	7	1	646	1	8	0,000668002	0,002490063	0,877706814	0,419597554	SLC27A1	long-chain fatty acid transport protein 1 [OS=Homo sapiens]	Q6PCB7
5,79884	6,03824	6,14977	6,490079	6,169729	6,951985	7,033783	7,001413	7,051644	7,00337	FALSK		5	+	CRVO_Control	4	6	3	1	809	1	4	0,000856504	0,002919971	0,879107571	0,41901008	PDE4D	cAMP-specific 3',5'-cyclic phosphodiesterase 4D [OS=Homo sapiens]	Q08499-1
6,325454	6,163556	5,800242	6,230816	6,174345	7,068557	7,159366	6,469124	7,007596	7,230649	FALSK		16	+	CRVO_Control	6	65	5	1	704	0	6	0,000353892	0,001624219	0,848175621	0,408700555	TRAP1	heat shock protein 75 kDa, mitochondrial [OS=Homo sapiens]	Q12931
6,435356	6,145607	5,895594	6,063521	6,156215	7,047654	6,961954	7,045968	7,045859	6,946772	FALSK		X	+	CRVO_Control	13	47	13	1	498	0	13	0,000676963	0,002511124	0,870382977	0,416186054	MECP2	Isoform B of Methyl-CpG-binding protein 2 [OS=Homo sapiens]	P51608-2
6,235672	5,992352	6,083579	6,246828	6,129354	7,200898	6,909398	7,190571	6,854095	6,814514	FALSK		6	+	CRVO_Control	2	6	2	1	455	0	2	0,000744954	0,002676891	0,856338406	0,409316881	NT5DC1	5'-nucleotidase domain-containing protein 1 [OS=Homo sapiens]	Q5TFE4
6,234834	6,371387	5,856818	6,155846	6,08861	6,916168	7,112501	6,982532	7,028368	6,999805	FALSK		11	+	CRVO_Control	16	107	2	1	858	15	16	0,000359261	0,00163894	0,866375923	0,417085959	NCAM1	Neural cell adhesion molecule 1 [OS=Homo sapiens]	P13591-2
6,37585	6,167361	6,00204	5,945284	6,227802	7,062855	6,963437	7,027056	6,97793	7,012873	FALSK	Acetyl [N-Term]	17	+	CRVO_Control	3	8	3	1	384	0	3	0,000239109	0,001273121	0,865162659	0,418059292	AIPL1	aryl-hydrocarbon-interacting protein-like 1 [OS=Homo sapiens]	Q9NZN9-1
5,894571	6,33428	6,132019	6,06975	6,303724	7,146644	6,936599	6,997445	6,9943	6,953605	FALSK		1	+	CRVO_Control	21	59	21	1	1532	0	21	0,001767053	0,004991727	0,858849716	0,405910902	AGL	glycogen debranching enzyme [OS=Homo sapiens]	P35573-1
6,321927	6,279825	5,856297	6,158146	6,105929	7,036696	7,038511	6,895717	7,001658	7,055179	FALSK		16	+	CRVO_Control	2	10	2	1	173	0	2	0,000136122	0,000986686	0,861127186	0,418041646	GCSH	Glycine cleavage system H protein, mitochondrial [OS=Homo sapiens]	P23434
6,308871	6,199564	6,061413	6,012344	6,17986	7,001658	6,937813	7,083797	6,953969	7,05358	FALSK		9	+	CRVO_Control	5	10	5	1	470	0	5	0,000156777	0,001030055	0,853752899	0,414128307	RORB	Nuclear receptor ROR-beta [OS=Homo sapiens]	Q92753-2
6,308063	6,520419	5,75077	5,970245	6,110463	7,005624	7,08693	6,895988	7,065538	6,974943	FALSK		2	+	CRVO_Control	7	18	7	1	706	0	7	0,00142793	0,004239064	0,873812771	0,413850184	LOC100524730;SLC44A2	Choline transporter-like protein 2 [OS=Sus scrofa]	F1S584
6,069104	5,987311	6,093589	6,337384	6,242945	7,012623	7,023967	6,957536	7,077427	6,948887	FALSK		1	+	CRVO_Control	2	3	2	1	370	0	2	0,00015571	0,001031984	0,858021069	0,416158211	LPGAT1	Acyl-CoA:lysophosphatidylglycerol acyltransferase 1 [OS=Homo sapiens]	Q92604
6,244106	6,181629	6,017632	6,169836	6,168822	7,102742	6,897208	7,046413	7,013973	6,964033	FALSK		1	+	CRVO_Control	5	12	5	1	180	0	5	7,97E-05	0,000740852	0,848468781	0,413576153	TRAPPC3	Trafficking protein particle complex subunit 3 [OS=Homo sapiens]	O43617-1
6,462573	6,019013	6,000999	6,171655	6,087363	6,964607	6,9877	7,03266	6,993774	7,050922	FALSK		2	+	CRVO_Control	4	22	4	1	172	0	4	0,000843351	0,002890725	0,857611942	0,409307376	LGALSL	Galectin-related protein [OS=Homo sapiens]	Q3ZCW2
6,477176	6,158379	6,023405	6,049845	6,031203	7,00436	7,025137	7,052563	6,957603	6,989227	FALSK		2	+	CRVO_Control	19	299	18	1	334	0	19	0,000592964	0,00228913	0,857776642	0,41101442	LDHB	L-lactate dehydrogenase B chain [OS=Sus scrofa]	P00336
6,003908	6,240414	5,96464	6,095369	6,103521	6,849925	6,889263	7,004365	7,103445	7,057823	FALSK		9	+	CRVO_Control	4	7	4	1	515	0	4	0,000220702	0,001228605	0,899393654	0,434330099	SLC25A25	Isoform 3 of Calcium-binding mitochondrial carrier protein SCaMC-2 [OS=Homo sapiens]	Q6KCM7-3
6,272132	6,06729	6,107455	6,194256	6,124426	6,966307	7,038885	6,898634	6,991216	7,119576	FALSK		8	+	CRVO_Control	7	15	6	1	418	0	7	0,00012304	0,000938522	0,849811459	0,413006405	AP3M2	AP-3 complex subunit mu-2 [OS=Homo sapiens]	P53677
6,246925	6,152019	5,765379	6,150704	6,263245	7,042709	7,05076	6,902732	6,998006	6,99332	FALSK		19	+	CRVO_Control	3	6	3	1	707	0	3	0,000224903	0,001235664	0,881851196	0,426073713	PIP5K1C	Isoform 3 of Phosphatidylinositol 4-phosphate 5-kinase type-1 gamma [OS=Homo sapiens]	O60331-3
6,133281	6,273305	5,98982	6,157852	6,233581	6,981841	6,996044	6,994309	6,990939	7,060686	FALSK		14	+	CRVO_Control	10	451	10	1	381	0	10	4,76E-05	0,00062719	0,847196293	0,414239246	CKB	Creatine kinase B-type [OS=Homo sapiens]	P12277
5,953028	6,407593	5,885159	6,070154	6,35355	6,786699	7,107114	7,071231	6,948214	7,077141	FALSK		X	+	CRVO_Control	2	3	2	1	268	0	2	0,000578532	0,002244845	0,86418314	0,414065661	HCCS	Cytochrome c-type heme lyase [OS=Homo sapiens]	P53701
6,275312	6,229589	5,943515	6,106431	6,218235	6,924717	7,05247	7,001466	6,996561	7,042179	FALSK		2	+	CRVO_Control	4	10	4	1	254	0	4	0,000207777	0,001189855	0,848862171	0,410919056	NFU1	NFU1 iron-sulfur cluster scaffold homolog, mitochondrial [OS=Homo sapiens]	Q9UMS0
6,354035	6,353386	5,82255	5,981737	6,174364	7,066749	6,928427	6,877575	7,101621	7,034004	FALSK		18	+	CRVO_Control	4	7	4	1	785	0	4	0,001065264	0,003390778	0,864460754	0,41124239	CDH7	Cadherin-7 [OS=Homo sapiens]	Q9ULB5
6,267708	6,178905	6,064004	6,113431	6,173693	6,995385	7,024341	7,0128	6,976089	7,012318	FALSK		18	+	CRVO_Control	23	102	16	1	1087	8	23	1,80E-05	0,000495798	0,844638443	0,414999136	EPB41L3	Band 4.1-like protein 3 [OS=Homo sapiens]	Q9Y2J2
6,235395	6,223035	6,043664	6,070159	6,221736	6,948158	6,985594	6,946021	7,099127	7,036108	FALSK		17;CHR_HSCHR17_7_CTG4	+	CRVO_Control	7	26	5	1	416	2	7	0,000111544	0,000894004	0,844203949	0,410637864	PIP4K2B	Phosphatidylinositol 5-phosphate 4-kinase type-2 beta [OS=Homo sapiens]	P78356
6,321766	6,249221	5,894718	6,13625	6,172711	7,050388	7,025448	6,972685	6,888088	7,077278	FALSK		19	+	CRVO_Control	5	10	5	1	452	0	5	0,00020048	0,00116926	0,847844124	0,410560369	TIMM44	Mitochondrial import inner membrane translocase subunit TIM44 [OS=Homo sapiens]	O43615
6,225729	6,290207	5,963926	6,180753	6,12923	6,955359	6,973676	6,95711	7,058464	7,070873	FALSK		19	+	CRVO_Control	3	8	3	1	662	0	3	0,000146518	0,001017308	0,845127487	0,410275085	EPN1	Isoform 2 of Epsin-1 [OS=Homo sapiens]	Q9Y6I3-1
6,3134	6,303752	6,025562	6,12544	6,014567	7,001413	7,016736	6,955132	7,012825	7,030402	FALSK		12	+	CRVO_Control	3	7	3	1	275	0	3	0,000180836	0,001114714	0,846757603	0,41038579	NECAP1	adaptin ear-binding coat-associated protein 1 [OS=Homo sapiens]	Q8NC96
6,487004	6,034009	6,018938	6,213329	5,997233	7,058904	6,969238	7,064673	7,029735	6,887463	FALSK		16	+	CRVO_Control	8	27	2	1	391	6	8	0,000424786	0,001842521	0,851900005	0,409712954	NDRG4	Isoform 6 of Protein NDRG4 [OS=Homo sapiens]	Q9ULP0-6
6,524703	6,040908	5,644087	5,979637	6,112578	6,907338	7,116322	6,898328	7,091023	6,93335	FALSK		X	+	CRVO_Control	7	9	4	1	894	0	7	0,003755137	0,008685615	0,928889465	0,431356843	GRIA3	Glutamate receptor 3 [OS=Homo sapiens]	P42263-1
6,404206	6,196481	5,949788	6,164848	6,069283	6,940073	7,028412	6,978335	7,038912	7,024018	FALSK		12	+	CRVO_Control	30	87	30	1	749	0	30	0,000558167	0,002195032	0,845028973	0,405415378	DNM1L	Isoform 6 of Dynamin-1-like protein [OS=Homo sapiens]	O00429-6
6,280704	6,253567	6,124059	6,04505	6,110227	7,033783	7,054431	6,907702	6,96325	7,032001	FALSK		1	+	CRVO_Control	7	11	7	1	1489	0	7	1,90E-05	0,000502553	0,835512352	0,410504575	CAMSAP2	Calmodulin-regulated spectrin-associated protein 2 [OS=Homo sapiens]	Q08AD1
6,206369	6,498144	5,859523	6,163687	6,010837	7,000495	7,119858	6,896606	6,997445	6,982965	FALSK		15	+	CRVO_Control	5	16	5	1	423	0	5	0,000301827	0,001444729	0,851761723	0,410963931	IVD	Isovaleryl-CoA dehydrogenase, mitochondrial [OS=Homo sapiens]	P26440
6,008021	6,381518	6,035247	6,14873	6,227021	7,032321	7,060663	6,897824	6,886878	7,11303	FALSK		2	+	CRVO_Control	8	47	8	1	102	0	8	0,000155848	0,0010293	0,83803606	0,4067462	HSPE1	10 kDa heat shock protein, mitochondrial [OS=Homo sapiens]	P61604
5,957436	6,304658	6,073272	6,243103	6,235536	6,982992	7,041659	6,975452	6,935442	7,063931	FALSK		2	+	CRVO_Control	27	237	27	1	573	0	27	0,000148117	0,001019074	0,837094402	0,406455365	HSPD1	60 kDa heat shock protein, mitochondrial [OS=Homo sapiens]	P10809
6,568912	6,476746	5,492654	6,113358	5,900782	7,132935	7,069096	6,898182	6,921042	6,956229	FALSK		3			2	3	2	1	1394	0	2	0,004904458	0,010582129	0,885006523	0,41024456	ROBO2	Isoform 3 of Roundabout homolog 2 [OS=Homo sapiens]	Q9HCK4-3
5,954196	6,013462	6,334496	6,05745	6,424586	7,054197	6,851749	7,073606	7,006747	7,005625	FALSK		2	+	CRVO_Control	4	10	2	1	698	0	4	0,000683845	0,002524301	0,84154644	0,402935794		Isoform 3 of Cyclic nucleotide-gated cation channel alpha-3 [OS=Homo sapiens]	Q16281-3
6,324936	6,177311	6,058496	6,17772	6,088317	6,957414	7,014264	7,017127	7,009917	6,999368	FALSK		1	+	CRVO_Control	9	14	9	1	728	0	9	0,000115919	0,000907955	0,83426218	0,405824961	HOOK1	Protein Hook homolog 1 [OS=Homo sapiens]	Q9UJC3
6,431566	5,952826	5,910447	6,203336	6,279497	6,993221	6,955054	6,739206	7,022792	7,238505	FALSK		20	+	CRVO_Control	12	58	4	1	206	8	12	0,000410198	0,00179984	0,834221458	0,401662479	SNAP25	Synaptosomal-associated protein 25 [OS=Homo sapiens]	P60880
6,385885	6,177896	5,998851	6,180827	6,087457	6,970304	6,908088	6,920648	7,039275	7,141567	FALSK		13	+	CRVO_Control	17	43	14	1	858	0	17	0,000500634	0,002038564	0,829793072	0,398835463	HSPH1	Heat shock protein 105 kDa [OS=Homo sapiens]	Q92598
6,284227	6,3156	5,943169	6,173815	6,117872	6,999979	7,007305	6,998277	6,976698	7,008987	FALSK		7	+	CRVO_Control	13	155	9	1	247	2	13	0,000229681	0,001247452	0,831312466	0,402363492	YWHAG	14-3-3 protein gamma [OS=Homo sapiens]	P61981
6,431285	6,07832	6,084276	5,992437	6,235395	7,067162	6,840408	7,130715	6,773382	7,138015	FALSK		18	+	CRVO_Control	4	12	4	1	259	0	4	0,000288291	0,001410207	0,825593758	0,398925632	HDHD2	haloacid dehalogenase-like hydrolase domain-containing protein 2 [OS=Homo sapiens]	Q9H0R4-1
6,094699	6,231323	6,067566	6,162876	6,27283	7,020169	6,967239	6,988791	7,047139	6,956546	FALSK		12	+	CRVO_Control	8	19	8	1	386	0	8	7,90E-05	0,000737975	0,830118084	0,40487347	ZNF385A	Zinc finger protein 385A [OS=Homo sapiens]	Q96PM9
6,373262	6,140565	5,912096	6,232158	6,160926	6,997708	7,037036	6,896507	6,993414	7,057444	FALSK		1	+	CRVO_Control	9	18	9	1	559	0	9	0,000190549	0,001142994	0,832620621	0,40357762	DNAJC11	DnaJ homolog subfamily C member 11 [OS=Homo sapiens]	Q9NVH1-1
6,394663	6,028984	6,136991	6,093107	6,101674	6,947416	7,089129	7,038802	6,917133	6,965837	FALSK		2	+	CRVO_Control	4	17	4	1	314	0	4	0,000519055	0,002093337	0,8405797	0,403668668	FAHD2A	fumarylacetoacetate hydrolase domain-containing protein 2A [OS=Homo sapiens]	Q96GK7
6,095897	6,165911	6,205692	6,214658	6,188624	6,932867	6,982423	7,08358	6,939736	7,038054	FALSK		12	+	CRVO_Control	12	39	12	1	299	0	12	5,99E-06	0,000493666	0,821175861	0,405318684	PHB2	Prohibitin-2 [OS=Homo sapiens]	Q99623
6,34821	6,083232	6,116826	6,250473	6,053295	7,002241	7,012339	7,004427	7,04634	6,906013	FALSK		15	+	CRVO_Control	5	12	5	1	426	0	5	6,62E-05	0,000711013	0,823864841	0,402327186	DNAJA4	Isoform 2 of DnaJ homolog subfamily A member 4 [OS=Homo sapiens]	Q8WW22-2
6,375718	6,15662	6,018499	6,13468	6,180887	6,982341	6,894805	6,990794	7,067199	7,032878	FALSK		2	+	CRVO_Control	4	14	3	1	324	1	4	0,000251759	0,001296762	0,820322514	0,396915015	DNAJB2	DnaJ homolog subfamily B member 2 [OS=Homo sapiens]	P25686-3
6,208344	6,279723	6,237114	6,075984	6,027905	6,825142	6,755679	7,276031	6,963727	7,056366	FALSK		3	+	CRVO_Control	4	12	2	1	620	0	4	0,002004881	0,005464057	0,809574986	0,383151945	RHOT2	Mitochondrial Rho GTPase 2 [OS=Sus scrofa]	Q864R5
6,373591	6,345806	5,872575	6,176024	6,070581	6,908252	6,985024	7,012991	6,906057	7,125735	FALSK		9	+	CRVO_Control	3	8	3	1	227	0	3	0,002279383	0,005980028	0,819896603	0,387043977	AK3	GTP:AMP phosphotransferase AK3, mitochondrial [OS=Homo sapiens]	Q9UIJ7-1
6,382828	6,377694	5,798211	6,164752	6,125142	6,997155	7,015687	6,964052	6,998277	6,980121	FALSK		6	+	CRVO_Control	26	558	2	1	445	8	26	0,001157223	0,003601832	0,821332741	0,391277796	TUBB2A	Tubulin beta-2A chain [OS=Homo sapiens]	Q13885
6,220884	6,064519	6,202494	6,100039	6,322039	7,040551	6,905542	7,090052	6,892304	7,016736	FALSK			+	CRVO_Control	8	32	8	1	396	0	8	1,49E-05	0,000486978	0,807042217	0,397142564		Isoform 3 of 1-acyl-sn-glycerol-3-phosphate acyltransferase gamma [OS=Homo sapiens]	Q9NRZ7-3
6,445256	6,18969	5,987448	6,044393	6,220136	7,0612	6,980689	7,031746	6,998837	6,874059	FALSK		9	+	CRVO_Control	13	53	12	1	530	1	13	0,000614911	0,002352297	0,811921597	0,389765558	PSIP1	PC4 and SFRS1-interacting protein [OS=Homo sapiens]	O75475-1
6,374215	6,180862	6,120586	6,09073	6,136192	6,85779	7,094088	6,741108	7,088339	7,122268	FALSK		19	+	CRVO_Control	2	3	2	1	496	0	2	0,001568874	0,004550576	0,800201225	0,380215033	FSD1	fibronectin type III and SPRY domain-containing protein 1 [OS=Homo sapiens]	Q9BTV5
6,355792	6,334496	5,970394	6,175924	6,061776	6,88996	7,084277	7,020146	6,958843	6,98982	FALSK		15	+	CRVO_Control	2	4	2	1	1400	0	2	0,000748889	0,002685941	0,808932877	0,387580387	SCAPER	S phase cyclin A-associated protein in the endoplasmic reticulum [OS=Homo sapiens]	Q9BY12
6,311062	6,099136	6,121051	6,104233	6,286255	6,968473	6,867275	7,14669	6,834199	7,101697	FALSK		1	+	CRVO_Control	3	9	3	1	305	0	3	0,000211526	0,001202241	0,799319458	0,387603395	CYB5R1	NADH-cytochrome b5 reductase 1 [OS=Homo sapiens]	Q9UHQ9
6,203783	6,141551	5,927232	6,256202	6,369748	7,025712	6,963832	6,841708	7,021808	7,076922	FALSK			+	CRVO_Control	4	9	4	1	211	0	4	1,97E-05	0,000500412	0,806293011	0,396327312		Isoform 2 of Dr1-associated corepressor [OS=Homo sapiens]	Q14919-2
6,413586	6,266639	5,951257	6,125504	6,147196	6,991972	7,012865	7,054676	6,974856	6,903761	FALSK		19	+	CRVO_Control	13	66	11	1	620	0	13	0,000721528	0,00261003	0,806789589	0,38675107	LMNB2	Lamin-B2 [OS=Homo sapiens]	Q03252
6,195467	6,414056	6,0124	5,995844	6,205289	6,869688	7,124801	7,06832	6,928341	6,905107	FALSK		6	+	CRVO_Control	12	39	3	1	351	0	12	0,000431336	0,00186029	0,814640236	0,392391038	PRKACB	cAMP-dependent protein kinase catalytic subunit beta [OS=Sus scrofa]	P05383
6,704596	5,738768	6,321928	6,451211	5,332708	7,363697	6,903279	6,958843	7,072535	6,510962	FALSK		2	+	CRVO_Control	4	8	2	1	513	0	4	0,002845655	0,007005117	0,852020931	0,399909359	ABI2	abl interactor 2 [OS=Homo sapiens]	Q9NYB9
6,222878	6,510074	5,84233	6,163812	6,138335	7,112097	6,826546	7,100218	7,074667	6,782647	FALSK		14			4	6	3	1	318	1	4	0,006762552	0,013415403	0,803749371	0,372764509	RDH11	Retinol dehydrogenase 11 [OS=Homo sapiens]	Q8TC12
6,496964	6,238259	5,897583	6,184874	6,070388	6,917376	6,944857	7,084136	7,022725	6,96023	FALSK		12	+	CRVO_Control	3	22	3	1	102	0	3	0,002927531	0,007169426	0,808250809	0,380392802	PTMS	Parathymosin [OS=Homo sapiens]	P20962
6,5411	6,068979	5,944486	6,23139	6,102085	7,01625	6,919641	6,908678	7,091613	6,989116	FALSK		7	+	CRVO_Control	5	11	3	1	426	0	5	0,000698961	0,002560155	0,807451534	0,3871865	ACTL6B	Actin-like protein 6B [OS=Homo sapiens]	O94805
6,480458	6,274736	5,860389	6,170923	6,109506	7,023476	6,966937	7,001125	6,988668	6,950702	FALSK		2	+	CRVO_Control	24	1098	7	1	448	6	24	0,001226891	0,00375395	0,806979084	0,384481514	TUBA4A	Tubulin alpha-4A chain [OS=Homo sapiens]	P68366
6,372409	6,413556	5,894376	6,027587	6,192575	7,052396	7,003915	6,841686	7,000704	7,022244	FALSK		1	+	CRVO_Control	20	129	20	1	562	0	20	0,000416573	0,001819388	0,804088402	0,387617544	PGM1	Phosphoglucomutase-1 [OS=Homo sapiens]	P36871-1
6,276833	6,179669	6,163687	6,119583	6,214587	6,831596	7,055428	6,959991	6,93741	7,124986	FALSK		13	+	CRVO_Control	3	4	3	1	340	0	3	0,000223702	0,001238033	0,791010571	0,383529906	CLYBL	Citrate lyase subunit beta-like protein, mitochondrial [OS=Homo sapiens]	Q8N0X4
6,043	6,337096	5,962896	6,249827	6,310744	6,826454	7,064502	6,988229	6,924061	7,095755	FALSK	Acetyl [N-Term]	8	+	CRVO_Control	3	6	3	1	365	0	3	0,000185542	0,001129037	0,799087334	0,387878529	RRS1	Ribosome biogenesis regulatory protein homolog [OS=Homo sapiens]	Q15050
6,454252	6,272141	5,638527	6,22978	6,175882	7,116516	7,048503	7,006661	6,852374	6,842922	FALSK		2	+	CRVO_Control	3	6	3	1	567	0	3	0,0042065	0,009408165	0,819278717	0,382917353	ZNF512	Zinc finger protein 512 [OS=Homo sapiens]	Q96ME7
6,601527	6,234846	5,798151	6,067518	6,092645	6,983517	6,967531	7,053942	6,93369	6,974632	FALSK		3	+	CRVO_Control	3	5	3	1	337	0	3	0,004234927	0,009455011	0,823725033	0,384812652	TAMM41	Isoform 3 of Phosphatidate cytidylyltransferase, mitochondrial [OS=Homo sapiens]	Q96BW9-3
6,388054	6,260103	5,825831	6,216117	6,242537	6,927385	6,935205	7,031208	7,028715	6,986153	FALSK		17	+	CRVO_Control	7	18	5	1	673	1	7	0,002081942	0,005601592	0,795204639	0,376508546	FXR2	Fragile X mental retardation syndrome-related protein 2 [OS=Homo sapiens]	P51116
6,381976	6,672425	6,098032	5,542258	6,068241	6,874059	7,010108	7,101188	7,187847	6,689299	FALSK		7			3	6	2	1	1374	0	3	0,024799664	0,039075447	0,819914055	0,367020349	PPP1R9A	Isoform 3 of Neurabin-1 [OS=Homo sapiens]	Q9ULJ8-3
6,546567	6,071454	6,04492	6,016354	6,240016	6,83953	6,933589	7,147299	6,87568	7,086117	FALSK		15	+	CRVO_Control	3	4	3	1	527	0	3	0,004062773	0,009206201	0,7925807	0,371450684	BBS4	Isoform 2 of Bardet-Biedl syndrome 4 protein [OS=Homo sapiens]	Q96RK4-2
6,26573	6,211738	6,071481	6,207699	6,1879	6,885681	6,977513	6,956335	7,01719	7,047154	FALSK		14	+	CRVO_Control	2	8	2	1	437	0	2	7,25E-05	0,000719306	0,787865257	0,384940515	FNTB	protein farnesyltransferase subunit beta [OS=Homo sapiens]	P49356
5,943582	6,169512	6,350783	6,097036	6,346969	6,900761	6,637023	7,138301	6,918824	7,226854	FALSK		1	+	CRVO_Control	2	5	2	1	658	0	2	0,000734668	0,002652502	0,78277626	0,375630496	CPT2	Carnitine O-palmitoyltransferase 2, mitochondrial [OS=Homo sapiens]	P23786
5,329177	6,626543	6,114615	6,162252	6,410856	6,987422	6,741228	6,764857	6,991477	7,263899	FALSK		1			3	6	3	1	452	0	3	0,029632431	0,045498804	0,821087837	0,365252056	RCC1	Isoform 2 of Regulator of chromosome condensation [OS=Homo sapiens]	P18754-2
6,275106	6,316139	5,908755	6,246975	6,235052	7,007944	7,008349	7,002612	6,977243	6,902033	FALSK		1	+	CRVO_Control	7	14	2	1	795	2	7	0,000570382	0,002226898	0,783230877	0,376802745	MARK1	Serine/threonine-protein kinase MARK1 [OS=Homo sapiens]	Q9P0L2-1
6,329463	6,182768	6,24413	5,951559	6,116055	7,07204	7,133459	6,731243	6,882345	7,001225	FALSK		8	+	CRVO_Control	2	4	2	1	467	0	2	0,000749024	0,002683883	0,799267483	0,383139837	ADHFE1	hydroxyacid-oxoacid transhydrogenase, mitochondrial [OS=Homo sapiens]	Q8IWW8
6,388445	6,32994	6,048807	6,129356	6,089359	6,852133	6,959263	7,019	7,039505	7,019033	FALSK	Acetyl [N-Term]	7	+	CRVO_Control	4	14	4	1	152	0	4	0,001429488	0,004240368	0,780605412	0,37179364	FIS1	mitochondrial fission 1 protein [OS=Homo sapiens]	Q9Y3D6
6,229044	6,518025	6,02495	6,168856	6,005498	7,041894	7,072342	6,953605	7,01055	6,789347	FALSK		8	+	CRVO_Control	3	5	3	1	282	0	3	0,000230424	0,001244356	0,784272766	0,380274492	ARMC1	armadillo repeat-containing protein 1 [OS=Homo sapiens]	Q9NVT9
6,34864	6,223031	6,075727	6,208359	6,16792	6,967488	6,855438	7,024585	6,945982	7,089427	FALSK		1;17;2	+	CRVO_Control	7	113	2	1	136	0	7	0,000382693	0,001708821	0,771848392	0,372889409	H3F3A;H3F3AP4;H3F3B	histone H3.3 [OS=Homo sapiens]	P84243
6,256779	6,126081	6,192392	6,174801	6,282339	6,966311	6,970757	6,987419	6,973217	6,992646	FALSK		1	+	CRVO_Control	2	3	2	1	744	0	2	8,49E-06	0,000466253	0,771591282	0,380720278	ZYG11B	Protein zyg-11 homolog B [OS=Homo sapiens]	Q9C0D3
6,318403	6,319841	5,992013	6,223859	6,164477	6,92065	6,963991	7,007024	7,014369	6,976477	FALSK		6	+	CRVO_Control	19	47	15	1	602	3	19	0,000447136	0,001891846	0,772783566	0,372811297	PPP2R5D	Serine/threonine-protein phosphatase 2A 56 kDa regulatory subunit delta isoform [OS=Homo sapiens]	Q14738-1
6,185338	6,252025	6,034509	6,250159	6,262539	6,924059	6,798666	7,106423	6,998713	7,010088	FALSK		15	+	CRVO_Control	4	4	4	1	362	0	4	0,000803697	0,00280296	0,770675945	0,369708162	MORF4L1	Mortality factor 4-like protein 1 [OS=Homo sapiens]	Q9UBU8-1
6,290883	6,397233	6,01775	6,126688	6,193178	7,012339	6,930698	7,028977	7,006703	6,896614	FALSK		22	+	CRVO_Control	12	151	9	1	246	0	12	0,000702099	0,002564216	0,769920063	0,369877056	YWHAH	14-3-3 protein eta [OS=Homo sapiens]	Q04917
6,189812	6,276836	5,983829	6,283455	6,302656	6,934827	6,988076	6,984104	7,062739	6,903136	FALSK		1	+	CRVO_Control	9	21	9	1	879	0	9	0,000304348	0,001453127	0,767258549	0,371458054	AMPD2	AMP deaminase 2 [OS=Homo sapiens]	Q01433-1
6,240788	6,14336	6,20065	6,266086	6,198216	6,969336	7,001052	6,890618	6,947603	7,061112	FALSK		10	+	CRVO_Control	4	10	4	1	495	0	4	4,45E-05	0,000609246	0,764124298	0,37455931	WDR37	Isoform 2 of WD repeat-containing protein 37 [OS=Homo sapiens]	Q9Y2I8-2
6,357621	6,26796	6,045367	6,208201	6,166438	6,95578	7,001333	6,961563	6,977802	6,977269	FALSK		11	+	CRVO_Control	6	28	4	1	197	2	6	0,000122646	0,000939298	0,765631962	0,373138122	LIN7C	Protein lin-7 homolog C [OS=Homo sapiens]	Q9NUP9
6,1868	6,409311	5,943606	6,277236	6,206412	6,957675	6,972113	7,006847	6,948889	6,986826	FALSK		6	+	CRVO_Control	3	6	3	1	467	0	3	0,000761395	0,002702668	0,769796944	0,369512441	SMAP1	Stromal membrane-associated protein 1 [OS=Homo sapiens]	Q8IYB5
6,343408	6,059615	6,542258	5,228819	6,536053	7,076816	6,741467	6,891176	7,158862	6,966938	FALSK		19			2	4	2	1	517	0	2	0,044644948	0,064598854	0,825021362	0,360956129	GTF2F1	General transcription factor iif subunit 1 [OS=Homo sapiens]	P35269
6,513712	6,367241	5,881938	6,067117	6,157613	7,088436	7,000874	6,953572	6,916428	6,898096	FALSK		17	+	CRVO_Control	3	7	3	1	244	0	3	0,000920928	0,003038502	0,773956966	0,370673318	DCXR	L-xylulose reductase [OS=Homo sapiens]	Q7Z4W1
6,259212	6,302818	6,055048	6,25822	6,189823	6,96686	6,937217	6,885694	7,097967	6,971866	FALSK		X	+	CRVO_Control	10	50	5	1	318	5	10	4,09E-05	0,000606056	0,758896351	0,372199027	PRPS1	ribose-phosphate pyrophosphokinase 1 [OS=Homo sapiens]	P60891
6,195873	6,249085	6,207934	6,048779	6,35041	6,881769	7,071739	6,97451	6,964341	6,958169	FALSK		X	+	CRVO_Control	5	12	3	1	963	0	5	0,000140823	0,000999737	0,759689426	0,369983067	USP11	Ubiquitin carboxyl-terminal hydrolase 11 [OS=Homo sapiens]	P51784
6,301911	6,336365	5,971291	6,212136	6,244939	6,955881	7,001671	6,952859	6,946987	6,990992	FALSK		3	+	CRVO_Control	2	8	2	1	195	0	2	0,000216095	0,001219073	0,756349564	0,367304921	SELT	Selenoprotein T [OS=Homo sapiens]	P62341
6,43785	6,18178	6,027866	6,227664	6,186609	6,947475	7,001884	6,994076	6,964748	6,942753	FALSK		3	+	CRVO_Control	9	48	9	1	437	0	9	0,00051083	0,002066763	0,757833195	0,365407692	CADM2	Isoform 3 of Cell adhesion molecule 2 [OS=Homo sapiens]	Q8N3J6-3
6,615437	6,113679	5,796677	6,22978	6,228798	7,011175	6,976132	6,859222	6,935429	7,061224	FALSK		11	+	CRVO_Control	8	33	6	1	355	2	8	0,002177215	0,005792156	0,771762276	0,365755251	NTM	Isoform 4 of Neurotrimin [OS=Homo sapiens]	Q9P121-4
6,298292	6,397461	6,017922	6,024586	6,327328	6,936638	6,870365	7,001127	7,078951	6,954196	FALSK		2	+	CRVO_Control	2	2	2	1	332	0	2	0,002530037	0,006415632	0,75513773	0,357530361	SIX3	Homeobox protein SIX3 [OS=Homo sapiens]	O95343
6,286767	6,056469	6,111795	6,351586	6,249238	7,040227	6,944053	6,869842	6,979081	7,000842	FALSK		5	+	CRVO_Control	2	4	2	1	728	0	2	5,17E-05	0,000640671	0,755637741	0,370202988	TRIM36	E3 ubiquitin-protein ligase Trim36 [OS=Homo sapiens]	Q9NQ86
6,209454	6,197708	6,169925	6,270529	6,268659	6,892391	6,980711	6,938992	7,053112	6,974988	FALSK		X	+	CRVO_Control	2	2	2	1	249	0	2	3,74E-06	0,000567237	0,744783688	0,368530436	TSPAN7	Tetraspanin-7 [OS=Homo sapiens]	P41732
6,238247	6,187847	6,231783	6,29465	6,102631	6,92184	6,902017	6,970807	6,897005	7,121956	FALSK		19	+	CRVO_Control	4	10	4	1	277	0	4	0,000444501	0,00189125	0,751693535	0,363003964	CLPP	ATP-dependent Clp protease proteolytic subunit, mitochondrial [OS=Homo sapiens]	Q16740
6,380793	6,425248	5,90449	6,229964	6,105156	6,866872	7,085722	6,835217	7,078288	6,946201	FALSK		10	+	CRVO_Control	4	8	4	1	278	0	4	0,000711418	0,002578381	0,753329945	0,362165204	MARCH5	E3 ubiquitin-protein ligase MARCH5 [OS=Homo sapiens]	Q9NX47
6,399841	6,358864	6,131673	5,778265	6,31641	6,967199	6,799351	6,927559	7,128929	6,979333	FALSK		17			3	5	2	1	772	0	3	0,00843254	0,016210831	0,763463593	0,353797073	TLK2	Serine/threonine-protein kinase tousled-like 2 [OS=Homo sapiens]	Q86UE8
6,096978	6,438738	6,059453	6,272276	6,230695	6,943067	7,008961	6,996037	6,957076	6,930733	FALSK		2	+	CRVO_Control	14	43	14	1	589	0	14	0,000315752	0,001483293	0,747546577	0,36210396	FARSB	Phenylalanine--tRNA ligase beta subunit [OS=Homo sapiens]	Q9NSD9
5,819616	6,777246	5,911158	6,265243	6,142662	6,955939	7,10959	6,873261	6,907565	6,973093	FALSK		7			11	22	10	1	540	0	11	0,004837529	0,010467507	0,780704594	0,365121237	MPP6	MAGUK p55 subfamily member 6 [OS=Homo sapiens]	Q9NZW5
6,336514	6,194245	6,007986	6,301252	6,265899	6,938404	6,84976	6,931509	6,993243	7,103928	FALSK		3	+	CRVO_Control	2	3	2	1	1491	0	2	0,000244029	0,00128846	0,742189407	0,360301949	MAGI1	Membrane-associated guanylate kinase, WW and PDZ domain-containing protein 1 [OS=Homo sapiens]	Q96QZ7
6,541482	6,37288	5,951775	6,25321	5,918579	6,94832	7,006138	6,928163	6,981751	6,96176	FALSK		11	+	CRVO_Control	5	12	5	1	471	0	5	0,002831816	0,006993755	0,757640934	0,358066371	FBXO3	F-box only protein 3 [OS=Homo sapiens]	Q9UK99
6,434439	6,333804	6,024312	6,163485	6,136868	7,001956	6,997927	6,921835	7,023582	6,877711	FALSK		4	+	CRVO_Control	10	15	9	1	783	0	10	0,000257633	0,00130923	0,746020317	0,361959684	DCLK2	Isoform 3 of Serine/threonine-protein kinase DCLK2 [OS=Homo sapiens]	Q8N568-3
6,459791	6,214163	6,083183	6,109433	6,220566	6,845603	6,973871	7,077737	6,892962	7,022471	FALSK		7	+	CRVO_Control	2	3	2	1	887	0	2	0,001672094	0,004787694	0,745101547	0,354970218	BBS9	Protein PTHB1 [OS=Homo sapiens]	Q3SYG4
6,03131	5,956943	6,367376	6,301505	6,411441	7,01104	6,947709	6,90583	6,974886	6,98598	FALSK		2	+	CRVO_Control	14	34	13	1	726	1	14	0,00155664	0,00452201	0,751373959	0,358135436	ADD2	Beta-adducin [OS=Homo sapiens]	P35612-1
6,508531	6,275334	5,912899	6,172345	6,195204	6,860624	6,928777	7,030952	6,938692	7,056403	FALSK		1	+	CRVO_Control	6	8	6	1	1071	0	6	0,003952397	0,009020794	0,750227356	0,352940539	SRGAP2	SLIT-ROBO Rho GTPase-activating protein 2 [OS=Homo sapiens]	O75044
6,40358	6,241496	6,123958	6,155626	6,199786	7,011695	7,008324	7,035517	6,914997	6,846652	FALSK		10	+	CRVO_Control	12	45	11	1	372	0	12	0,000155991	0,001028457	0,738547897	0,359707451	H2AFY2	Core histone macro-H2A.2 [OS=Homo sapiens]	Q9P0M6
6,285829	6,256066	5,889958	6,351731	6,288391	7,050808	6,877613	6,908189	6,901006	7,064736	FALSK		17	+	CRVO_Control	3	4	3	1	250	0	3	0,000753473	0,002694731	0,746075249	0,358605146	GOSR1	Golgi SNAP receptor complex member 1 [OS=Homo sapiens]	O95249-1
6,364466	6,232506	6,043941	6,32328	6,16334	6,914068	6,91464	6,937561	7,03778	7,011695	FALSK		X	+	CRVO_Control	12	23	12	1	841	0	12	0,000276363	0,001374924	0,737642193	0,35782401	GRIPAP1	GRIP1-associated protein 1 [OS=Homo sapiens]	Q4V328
6,283551	6,121016	6,175924	6,431289	6,121016	7	6,911692	6,908092	7,041111	6,955359	FALSK		16	+	CRVO_Control	2	2	2	1	218	0	2	4,20E-05	0,000607846	0,736692047	0,361466723	MRPS34	28S ribosomal protein S34, mitochondrial [OS=Homo sapiens]	P82930
6,270485	6,18181	6,214311	6,201409	6,289039	6,910252	6,833491	7,056112	6,917066	7,085325	FALSK		10	+	CRVO_Control	4	6	4	1	351	0	4	5,12E-05	0,000639024	0,729038334	0,357441008	MCU	Calcium uniporter protein, mitochondrial [OS=Homo sapiens]	Q8NE86
6,425127	6,305512	5,976134	6,184777	6,232659	6,923466	6,964052	7,04864	6,946604	6,931911	FALSK		13	+	CRVO_Control	13	33	12	1	523	0	13	0,001436433	0,004257637	0,738092804	0,352435393	PSPC1	Paraspeckle component 1 [OS=Homo sapiens]	Q8WXF1
6,477309	6,361617	6,144468	6,046564	6,083023	7,06983	6,979564	6,943606	6,944857	6,872213	FALSK		6	+	CRVO_Control	5	19	5	1	184	0	5	0,00022028	0,001228064	0,739417744	0,359263989	GLO1	lactoylglutathione lyase [OS=Homo sapiens]	Q04760-1
6,345809	6,263783	6,117711	6,295574	6,11453	7,078346	6,845332	6,739417	6,978417	7,132093	FALSK		6	+	CRVO_Control	2	3	2	1	1086	0	2	0,000701644	0,002565025	0,727239895	0,35013575	MICAL1	Isoform 4 of Protein-methionine sulfoxide oxidase MICAL1 [OS=Homo sapiens]	Q8TDZ2-4
5,923439	6,171926	6,301108	6,311233	6,410728	6,947757	6,982409	6,917865	7,00157	6,960059	FALSK		2	+	CRVO_Control	7	11	3	1	973	4	7	0,00090792	0,003008676	0,738245296	0,354311373	SLC8A1	Sodium/calcium exchanger 1 [OS=Homo sapiens]	P32418
6,393155	6,29599	5,998501	6,274885	6,177685	6,950701	6,96264	6,993667	6,925385	6,977107	FALSK		8	+	CRVO_Control	3	8	2	1	457	0	3	0,000639297	0,002421156	0,733856678	0,353517292	BAG4	BAG family molecular chaperone regulator 4 [OS=Homo sapiens]	O95429
6,454091	6,042296	6,252769	6,340435	6,023604	6,928113	6,991604	6,834671	6,834046	7,186764	FALSK		11			2	3	2	1	773	0	2	0,006004859	0,012305092	0,732400322	0,342617022	CPT1A	Carnitine O-palmitoyltransferase 1, liver isoform [OS=Homo sapiens]	P50416
6,431241	6,240252	6,024298	6,227857	6,228817	6,992089	6,943067	6,953025	6,966927	6,949518	FALSK		5	+	CRVO_Control	14	81	14	1	847	0	14	0,000240504	0,001275176	0,730431938	0,354795322	MATR3	Matrin-3 [OS=Homo sapiens]	P43243
6,530738	6,103786	6,067075	6,253488	6,18078	6,986213	6,893953	6,985861	6,990251	6,94072	FALSK		19	+	CRVO_Control	14	69	11	1	295	3	14	0,000649258	0,00244909	0,732226181	0,352708898	NAPA	alpha-soluble nsf attachment protein [OS=Homo sapiens]	P54920
6,34244	6,43316	6,069468	6,068979	6,235821	6,925352	6,897239	6,883845	7,004206	7,074834	FALSK		3	+	CRVO_Control	3	10	2	1	799	0	3	0,001149723	0,003584375	0,727121258	0,348307083	ITGB5	Integrin beta-5 [OS=Homo sapiens]	P18084
6,215477	6,329473	6,101282	6,220635	6,30829	6,96596	6,905467	7,060204	6,996914	6,861319	FALSK		14;19;2	+	CRVO_Control	7	74	7	1	149	0	7	0,000617614	0,002360258	0,722941017	0,348560005	CALM3;CALM2;CALM1	Calmodulin [OS=Homo sapiens]	P62158
6,477525	6,308955	5,96474	6,191455	6,196516	6,932077	7,052881	6,770164	7,003407	7,019411	FALSK		2	+	CRVO_Control	6	20	6	1	170	0	6	0,000474564	0,001959776	0,72774992	0,351626282	PPP3R1	Calcineurin subunit B type 1 [OS=Homo sapiens]	P63098
6,301953	6,294621	5,956522	6,336283	6,274261	6,914086	6,815063	7,208478	6,927186	6,902073	FALSK		16			9	36	2	1	673	0	9	0,005790275	0,012001604	0,720649147	0,33768462	PRKCB	Isoform Beta-II of Protein kinase C beta type [OS=Homo sapiens]	P05771-2
6,283208	6,448267	5,934689	6,264852	6,214117	6,867256	7,079893	6,988367	7,001665	6,84423	FALSK		4	+	CRVO_Control	4	7	4	1	480	0	4	0,001041333	0,003345501	0,727255726	0,348743155	GRSF1	G-rich sequence factor 1 [OS=Homo sapiens]	Q12849
6,451809	6,36243	5,939148	6,259253	6,117496	6,832251	6,925823	7,0088	7,001402	7,013039	FALSK		5	+	CRVO_Control	2	3	2	1	312	0	2	0,003801638	0,0087611	0,730236149	0,344287128	MTX3	Metaxin-3 [OS=Homo sapiens]	Q5HYI7
6,385901	6,219019	6,03449	6,293713	6,236967	6,9167	6,969152	6,899888	6,992785	7,011815	FALSK		7	+	CRVO_Control	11	37	9	1	418	0	11	0,000196764	0,001161888	0,724050236	0,352280717	PRKAR2B	cAMP-dependent protein kinase type II-beta regulatory subunit [OS=Homo sapiens]	P31323
6,277294	6,295701	6,062897	6,227263	6,306526	6,856702	6,901339	6,957102	6,868511	7,181629	FALSK		10	+	CRVO_Control	2	4	2	1	159	0	2	0,000461635	0,001927378	0,719120312	0,347677481	MRPL43	Isoform 4 of 39S ribosomal protein L43, mitochondrial [OS=Homo sapiens]	Q8N983-4
6,011128	6,002135	6,303513	6,316018	6,419489	6,884177	6,922176	6,982971	7,106851	6,866407	FALSK		12	+	CRVO_Control	7	15	2	1	1093	0	7	0,000920219	0,003038806	0,742059803	0,356017835	SLC4A8	Electroneutral sodium bicarbonate exchanger 1 [OS=Homo sapiens]	Q2Y0W8
6,34244	6,32354	6,024579	6,316316	6,178589	6,970959	6,967454	6,968181	7,041604	6,830312	FALSK		14	+	CRVO_Control	8	19	8	1	553	0	8	0,000255091	0,001301546	0,718609238	0,349065348	ATL1	Isoform 2 of Atlastin-1 [OS=Homo sapiens]	Q8WXF7-2
6,501935	6,190691	5,993888	6,219163	6,260613	6,95791	6,998809	6,90628	6,909268	7,009288	FALSK	Acetyl [N-Term]	1	+	CRVO_Control	10	30	9	1	532	0	10	0,000688671	0,002534712	0,723052788	0,348256157	PTBP2	Isoform 2 of Polypyrimidine tract-binding protein 2 [OS=Homo sapiens]	Q9UKA9-2
6,128311	6,179311	6,155931	6,360561	6,308339	6,98685	6,901792	7,053576	6,972677	6,830733	FALSK		10	+	CRVO_Control	5	13	5	1	1341	0	5	0,000530846	0,002131818	0,722634983	0,348895556	FAM21A	WASH complex subunit FAM21A [OS=Homo sapiens]	Q641Q2
5,868465	6,364524	6,153133	6,217481	6,448955	6,975724	6,86264	7,009378	6,940345	6,963907	FALSK		10	+	CRVO_Control	2	7	2	1	439	0	2	0,002863155	0,007034491	0,739887333	0,350069707	OAT	Ornithine aminotransferase, mitochondrial [OS=Homo sapiens]	P04181-1
6,62781	6,492076	5,881971	5,957682	6,117768	7,076738	6,94716	6,855985	6,90009	6,98572	FALSK		15	+	CRVO_Control	4	62	4	1	317	0	4	0,003327247	0,007883497	0,737677288	0,348307133	RLBP1	Retinaldehyde-binding protein 1 [OS=Homo sapiens]	P12271
6,225892	6,624551	6,05692	6,069248	6,163619	6,980602	6,995111	6,788979	7,034213	6,954909	FALSK		4	+	CRVO_Control	2	5	2	1	1007	0	2	0,001739289	0,004939059	0,722716999	0,344629274	GRID2	Glutamate receptor ionotropic, delta-2 [OS=Homo sapiens]	O43424
6,42144	6,448469	5,704207	6,272724	6,241426	7,059288	7,059072	6,830242	7,012447	6,781899	FALSK		1	+	CRVO_Control	4	5	4	1	953	0	4	0,002145887	0,005732952	0,730936146	0,34743163	CLCN6	Isoform 5 of Chloride transport protein 6 [OS=Homo sapiens]	P51797-5
6,327732	6,293232	5,995392	6,214214	6,245474	6,993014	6,771442	6,967399	7,037187	6,943881	FALSK		20	+	CRVO_Control	2	2	2	1	1494	0	2	0,00090854	0,003008101	0,727375603	0,34929851	RALGAPB	Ral GTPase-activating protein subunit beta [OS=Homo sapiens]	Q86X10-1
6,426256	6,221928	6,097731	6,257146	6,217926	6,965635	6,948937	6,979422	6,938316	6,937767	FALSK		9	+	CRVO_Control	7	53	7	1	248	0	7	0,00020324	0,001174518	0,709818077	0,345463396	CLTA	clathrin light chain A [OS=Homo sapiens]	P09496-1
6,291706	6,353049	6,078255	6,196937	6,308794	7,040009	6,9292	6,941918	6,951679	6,898005	FALSK		11	+	CRVO_Control	9	32	3	1	545	2	9	0,000205184	0,001178565	0,706414413	0,343828608	PAK1	Serine/threonine-protein kinase PAK 1 [OS=Homo sapiens]	Q13153
6,283247	6,427468	6,02391	6,24712	6,227899	7,022498	6,932365	6,770964	7,065774	6,949225	FALSK		4	+	CRVO_Control	19	88	9	1	533	10	19	0,000183232	0,001122184	0,706236458	0,344003841	PHGDH	D-3-phosphoglycerate dehydrogenase [OS=Sus scrofa]	A5GFY8
6,170926	6,289735	6,108733	6,348659	6,31818	7,007106	6,977729	6,976123	6,967166	6,827709	FALSK		7	+	CRVO_Control	7	19	6	1	292	0	7	0,00046177	0,00192582	0,703919983	0,340565558	CDK5	Cyclin-dependent-like kinase 5 [OS=Homo sapiens]	Q00535
6,274242	6,391203	5,873488	6,449301	6,198233	6,953032	6,907051	6,897835	6,945261	7,038305	FALSK		17	+	CRVO_Control	2	5	2	1	448	0	2	0,002071625	0,005581756	0,71100378	0,338564771	INPP5K	Inositol polyphosphate 5-phosphatase K [OS=Homo sapiens]	Q9BT40
6,434242	6,268648	6,099951	6,309055	6,118935	6,921163	6,907994	6,981849	7,067632	6,870877	FALSK		7	+	CRVO_Control	6	11	6	1	2315	0	6	0,00044906	0,001893645	0,703736591	0,340558618	PTPRZ1	Receptor-type tyrosine-protein phosphatase zeta [OS=Homo sapiens]	P23471-1
6,255463	6,411664	6,093614	6,271758	6,201202	6,958027	6,955867	6,984476	6,947969	6,910229	FALSK		7	+	CRVO_Control	3	14	3	1	101	0	3	0,000219253	0,001225942	0,704573536	0,342801469	ACYP1	Acylphosphatase-1 [OS=Sus scrofa]	P24540-1
5,858977	6,408974	5,915139	6,168833	6,668668	6,911242	6,85989	6,749771	6,860848	7,264018	FALSK		X	+	CRVO_Control	9	16	5	1	836	4	9	0,00214598	0,005729162	0,725035477	0,34476406	NLGN4X	Isoform 2 of Neuroligin-4, X-linked [OS=Homo sapiens]	Q8N0W4-2
6,143355	6,340476	6,176863	6,283928	6,315538	6,971993	6,893286	6,967509	6,983409	6,931325	FALSK			+	CRVO_Control	32	64	28	1	1515	4	32	0,000174892	0,001101356	0,697472572	0,33994606		Isoform 3 of CLIP-associating protein 2 [OS=Homo sapiens]	O75122-3
6,397338	6,324529	5,987931	6,285326	6,243277	6,975512	7,035622	6,794925	6,996502	6,934795	FALSK		20	+	CRVO_Control	3	8	3	1	349	0	3	4,35E-05	0,000599611	0,699790955	0,3436285	TMX4	Thioredoxin-related transmembrane protein 4 [OS=Homo sapiens]	Q9H1E5
6,238767	6,245783	6,128694	6,341146	6,311785	6,879573	6,942999	6,92556	6,986665	7,005513	FALSK		13	+	CRVO_Control	10	18	7	1	2946	0	10	1,58E-05	0,000491859	0,694826984	0,342603539	NBEA	Neurobeachin [OS=Homo sapiens]	Q8NFP9-1
6,199587	6,437116	6,216166	6,206351	6,205537	6,972676	6,90591	6,880121	7,01021	6,970596	FALSK	Acetyl [N-Term]	7	+	CRVO_Control	3	9	3	1	131	0	3	0,000343656	0,001586846	0,694951153	0,33715314	C7orf41;MTURN	Maturin [OS=Homo sapiens]	Q8N3F0-1
6,304081	6,226789	6,0818	6,314306	6,333456	7,078058	6,818264	6,92184	6,932818	6,972815	FALSK		1	+	CRVO_Control	5	6	5	1	1481	0	5	0,000138837	0,000993078	0,692672443	0,338147826	MAGI3	Isoform 4 of Membrane-associated guanylate kinase, WW and PDZ domain-containing protein 3 [OS=Homo sapiens]	Q5TCQ9-4
6,539209	6,220063	6,10315	6,224884	6,157104	6,918859	6,987947	6,906169	6,91271	7,011773	FALSK		4	+	CRVO_Control	7	31	7	1	482	0	7	0,001153976	0,003594679	0,698609543	0,335187706	G3BP2	Ras GTPase-activating protein-binding protein 2 [OS=Homo sapiens]	Q9UN86
6,013988	5,620288	6,877392	6,352693	6,117505	6,957671	6,947168	6,943287	7,016085	6,871494	FALSK		8			2	5	2	1	405	0	2	0,021757005	0,034993978	0,750767994	0,340384406	DMTN;EPB49	Dematin [OS=Homo sapiens]	Q08495-1
6,372156	6,301	6,035194	6,227613	6,283705	6,978348	6,962097	6,864136	6,943088	6,969215	FALSK		2	+	CRVO_Control	5	8	5	1	336	0	5	4,61E-05	0,000613796	0,699442959	0,343368335	RDH14	Retinol dehydrogenase 14 [OS=Homo sapiens]	Q9HBH5
6,066074	6,007805	6,378601	6,262836	6,477883	7,120977	6,704763	7,053725	7,020467	6,779972	FALSK		10	+	CRVO_Control	3	6	3	1	621	0	3	0,004369559	0,009704158	0,697341061	0,328927884	KIAA1279;KIF1BP	KIF1-binding protein [OS=Homo sapiens]	Q96EK5
6,539159	6,477354	5,974988	6,238405	5,958843	6,948367	7,142618	6,82273	6,997744	6,799605	FALSK		17	+	CRVO_Control	2	3	2	1	257	0	2	0,00095684	0,003127052	0,704463291	0,338541131	PRNP	Major prion protein [OS=Sus scrofa]	P49927
6,478937	6,162934	6,152663	6,141017	6,327042	6,982352	6,777014	7,000558	6,993601	6,967649	FALSK		19	+	CRVO_Control	3	5	3	1	369	0	3	0,000547008	0,002171421	0,691716194	0,334373987	DHPS	deoxyhypusine synthase [OS=Homo sapiens]	P49366-1
6,334879	6,375301	6,057304	6,273679	6,229764	6,989026	6,928511	6,96922	6,964267	6,879534	FALSK		4	+	CRVO_Control	9	22	5	1	464	4	9	0,000312851	0,001475148	0,691926098	0,335965314	MAPK10	mitogen-activated protein kinase 10 [OS=Homo sapiens]	P53779
6,428575	6,196706	6,183919	6,178762	6,278255	6,933846	7,021607	6,863005	6,818089	7,076083	FALSK		10	+	CRVO_Control	4	9	4	1	256	0	4	0,000281747	0,001385347	0,689282703	0,334973854	PRDX3	Thioredoxin-dependent peroxide reductase, mitochondrial [OS=Homo sapiens]	P30048
6,346957	6,314405	6,091694	6,217419	6,318307	6,89421	6,977133	6,952444	6,963991	6,942502	FALSK		19	+	CRVO_Control	6	19	6	1	413	0	6	0,000214418	0,001211415	0,688299942	0,335142175	FKBP8	Isoform 2 of Peptidyl-prolyl cis-trans isomerase FKBP8 [OS=Homo sapiens]	Q14318-2
6,131846	6,633727	6,232851	6,120598	5,998899	7,264212	6,482919	6,645749	7,062644	7,09991	FALSK		2			4	7	3	1	1192	0	4	0,049163658	0,070199408	0,68750248	0,306079555	PKP4	Plakophilin-4 [OS=Homo sapiens]	Q99569
6,268492	6,315782	6,215796	6,249619	6,235665	6,887131	6,986835	7,013075	6,878967	6,947283	FALSK		17	+	CRVO_Control	14	65	14	1	272	0	14	2,95E-05	0,000551395	0,685587502	0,337327261	PHB	Prohibitin [OS=Homo sapiens]	P35232
6,273659	6,190406	6,227456	6,311569	6,283247	6,879988	6,896949	6,894894	6,86465	7,153575	FALSK		X	+	CRVO_Control	3	4	3	1	653	0	3	0,00023023	0,00124508	0,680743694	0,331400999	CHM	rab proteins geranylgeranyltransferase component A 1 [OS=Homo sapiens]	P24386-1
6,558411	6,328203	5,946935	6,20651	6,204857	6,960796	7,013271	6,984118	6,915878	6,842821	FALSK		2	+	CRVO_Control	13	63	2	1	559	0	13	0,002393381	0,006197614	0,694393635	0,330418961	MAP2	Isoform 4 of Microtubule-associated protein 2 [OS=Homo sapiens]	P11137-4
6,520463	6,146092	6,147471	6,228814	6,234574	6,951753	6,899054	6,953685	6,956072	6,957718	FALSK		16	+	CRVO_Control	4	6	4	1	399	0	4	0,000475282	0,001960604	0,688173294	0,33310974	TERF2IP	Telomeric repeat-binding factor 2-interacting protein 1 [OS=Homo sapiens]	Q9NYB0
6,008272	6,590744	6,06198	6,212246	6,309156	6,98976	7,01704	6,818896	6,966984	6,916223	FALSK		11	+	CRVO_Control	18	39	11	1	2390	0	18	0,001549317	0,004504187	0,705301094	0,33715949	SPTBN2	Spectrin beta chain, non-erythrocytic 2 [OS=Homo sapiens]	O15020
6,880304	6,042305	6,026369	5,869105	5,975642	6,793371	6,855576	6,99776	6,92052	7,076029	FALSK		2			2	8	2	1	150	0	2	0,024788256	0,039073713	0,769905853	0,346855695	PDE6D	Retinal rod rhodopsin-sensitive cGMP 3',5'-cyclic phosphodiesterase subunit delta [OS=Homo sapiens]	O43924
6,209258	6,179798	6,202207	6,307405	6,406602	6,822698	6,889935	6,985823	6,973253	7,032992	FALSK		3	+	CRVO_Control	6	11	6	1	454	0	6	2,54E-05	0,000520294	0,679886246	0,33476387	CPOX	Oxygen-dependent coproporphyrinogen-III oxidase, mitochondrial [OS=Homo sapiens]	P36551
6,240042	6,256155	6,323256	6,132898	6,274266	6,861852	6,905717	6,896235	7,001104	6,998356	FALSK		7	+	CRVO_Control	5	9	5	1	441	0	5	0,00018101	0,001113976	0,687329483	0,335051989	ANKMY2	Ankyrin repeat and MYND domain-containing protein 2 [OS=Homo sapiens]	Q8IV38
6,233548	6,212083	6,296036	6,352781	6,241858	6,886273	6,862559	6,858332	6,942399	7,134453	FALSK		X	+	CRVO_Control	2	6	2	1	140	0	2	0,000331086	0,001543846	0,669542027	0,325267799	TRAPPC2	Trafficking protein particle complex subunit 2 [OS=Sus scrofa]	F1SRI0
6,287807	6,470057	6,029301	6,374761	6,102095	7,047325	6,890864	6,877928	7,045761	6,813567	FALSK		17	+	CRVO_Control	2	6	2	1	309	0	2	0,000682979	0,002523562	0,682285118	0,329326617	FN3K	fructosamine-3-kinase [OS=Homo sapiens]	Q9H479
5,530398	6,274202	5,591278	6,658186	6,815441	6,780045	6,890512	7,430441	7,066619	6,30741	FALSK		6			5	107	3	1	221	3	5	0,143322541	0,17814287	0,72110424	0,300861845	HIST1H1D	Histone H1.3 [OS=Homo sapiens]	P16402
6,151748	6,419405	6,390247	6,136435	6,2156	6,831515	6,921354	7,001527	6,945401	6,987972	FALSK		11;CHR_HSCHR11_1_CTG8	+	CRVO_Control	7	13	2	1	189	1	7	0,000261269	0,001320626	0,674867058	0,328333168	HRAS	GTPase HRas [OS=Homo sapiens]	P01112
6,500176	6,353265	6,158904	6,12462	6,162867	6,899155	6,944973	6,962811	6,938818	6,950914	FALSK		2	+	CRVO_Control	4	6	4	1	399	0	4	0,001114997	0,003502034	0,679367638	0,326433898	LANCL1	LanC-like protein 1 [OS=Homo sapiens]	O43813
6,317133	6,25905	6,252906	6,28135	6,217926	6,886916	6,973785	6,991892	6,862033	6,978563	FALSK		8	+	CRVO_Control	5	7	5	1	348	0	5	7,75E-05	0,000738433	0,672964668	0,329789099	TUSC3	Tumor suppressor candidate 3 [OS=Homo sapiens]	Q13454-1
6,337433	6,103532	6,244544	6,075936	6,356169	6,882113	6,794757	6,933046	7,072531	6,949869	FALSK		9	+	CRVO_Control	2	3	2	1	941	0	2	0,000864575	0,002934292	0,702940273	0,33817972	GABBR2	Gamma-aminobutyric acid type B receptor subunit 2 [OS=Homo sapiens]	O75899
6,166825	6,442944	6,135242	6,320877	6,263863	6,933656	6,947182	6,961156	6,930143	6,927185	FALSK		19	+	CRVO_Control	16	41	16	1	910	0	16	0,000291535	0,001420579	0,673913956	0,327631083	EPS15L1	Isoform 2 of Epidermal growth factor receptor substrate 15-like 1 [OS=Homo sapiens]	Q9UBC2-2
6,084136	6,540179	6,06122	6,279411	6,325654	6,930458	6,952364	6,900182	6,96599	6,948214	FALSK		21	+	CRVO_Control	11	26	10	1	1721	1	11	0,00104266	0,003346931	0,681321716	0,32755897	ITSN1	Intersectin-1 [OS=Homo sapiens]	Q15811
6,514376	6,361515	5,943801	5,885051	6,261727	6,943881	7,250356	6,822145	6,73664	6,770975	FALSK		20;CHR_HSCHR20_1_CTG3	+	CRVO_Control	2	3	2	1	1148	0	2	0,002049294	0,005541278	0,711505318	0,338838763		Isoform 2 of Myelin transcription factor 1 [OS=Homo sapiens]	Q01538-2
6,163812	5,993219	6,476089	6,353265	6,31322	6,969165	6,858894	6,864301	6,935038	7,035105	FALSK		14	+	CRVO_Control	2	4	2	1	1078	0	2	0,001415989	0,004223457	0,672579575	0,322491431	DAAM1	Disheveled-associated activator of morphogenesis 1 [OS=Homo sapiens]	Q9Y4D1
6,56972	6,437058	5,917204	6,144266	6,199639	6,970872	6,990141	6,93834	6,915825	6,877073	FALSK		15	+	CRVO_Control	75	174	64	1	2542	0	75	0,002805367	0,006951077	0,684872818	0,325428714	TLN2	Talin-2 [OS=Homo sapiens]	Q9Y4G6
6,658141	6,344217	5,908412	6,165911	6,173427	6,892144	6,969205	6,964026	6,924142	6,944239	FALSK		5			11	25	11	1	1074	0	11	0,00672151	0,013368963	0,688729763	0,322800818	ZFR	Zinc finger RNA-binding protein [OS=Homo sapiens]	Q96KR1
6,146687	6,25154	6,269506	6,240283	6,443667	7,026773	6,839748	6,994225	6,92596	6,894732	FALSK		6	+	CRVO_Control	7	134	2	1	136	5	7	0,000734952	0,002651002	0,665950584	0,321500119	HIST1H3F;HIST1H3C;HIST1H3D;HIST1H3G;HIST1H3H;HIST1H3B;HIST1H3A;HIST1H3E;HIST1H3I;HIST1H3J	Histone H3.1 [OS=Homo sapiens]	P68431
6,603046	6,358471	5,932474	6,304513	6,0692	6,922378	6,917994	6,936086	7,037152	6,866042	FALSK		17	+	CRVO_Control	6	19	6	1	381	0	6	0,00407751	0,009223055	0,682389545	0,322602555	PRKAR1A	cAMP-dependent protein kinase type I-alpha regulatory subunit [OS=Homo sapiens]	P10644
6,674709	6,443481	5,838961	6,095886	6,173427	7,040961	6,871182	6,939009	6,988922	6,829278	FALSK		6			3	6	3	1	771	0	3	0,00765952	0,014898534	0,688577557	0,321977666	MAP7	Isoform 7 of Ensconsin [OS=Homo sapiens]	Q14244-7
6,508601	6,304192	6,073841	6,232098	6,205755	6,990928	6,817593	6,926475	7,027345	6,910294	FALSK		2	+	CRVO_Control	10	19	10	1	542	0	10	0,000833048	0,002870987	0,669629288	0,322844434	HNRNPLL;HNRPLL	Heterogeneous nuclear ribonucleoprotein L-like [OS=Homo sapiens]	Q8WVV9
6,335314	6,159668	6,025621	6,179771	6,552471	6,905862	7,0941	6,817987	6,85526	6,923724	FALSK		10	+	CRVO_Control	3	3	3	1	184	0	3	0,002225604	0,005883727	0,66881752	0,319102588	LRRC20	Leucine-rich repeat-containing protein 20 [OS=Homo sapiens]	Q8TCA0-1
6,360299	6,442961	5,801074	6,328541	6,324772	6,88946	7,03056	6,984029	6,941324	6,806977	FALSK		6			4	16	4	1	261	0	4	0,006076803	0,012412264	0,678940678	0,319044915	STX7	Syntaxin-7 [OS=Homo sapiens]	O15400
6,204653	6,390356	6,115857	6,250204	6,386894	6,918203	6,928484	6,884218	6,915905	7,02415	FALSK		6	+	CRVO_Control	7	17	7	1	389	0	7	6,72E-05	0,000706145	0,664599133	0,325996507	MTCH1	Mitochondrial carrier homolog 1 [OS=Homo sapiens]	Q9NZJ7
6,325245	6,181273	6,163732	6,402598	6,290394	6,910273	6,985647	6,872694	6,958973	6,945058	FALSK		3	+	CRVO_Control	12	17	12	1	1222	0	12	0,000119022	0,000926512	0,661880398	0,32373652	DHX30	Isoform 2 of Putative ATP-dependent RNA helicase DHX30 [OS=Homo sapiens]	Q7L2E3-2
6,400848	6,327139	6,131394	6,283978	6,214033	6,88371	6,969422	6,94962	6,910566	6,9582	FALSK		16	+	CRVO_Control	2	6	2	1	559	0	2	0,000311702	0,001471558	0,662825298	0,322235444	TBC1D24	TBC1 domain family member 24 [OS=Homo sapiens]	Q9ULP9
6,503983	6,311824	6,037917	6,238359	6,255606	7,009524	6,865935	6,960386	6,927044	6,907872	FALSK		5	+	CRVO_Control	13	32	13	1	744	0	13	0,00078061	0,002740084	0,664614677	0,320703375	KIF2A	Isoform 4 of Kinesin-like protein KIF2A [OS=Homo sapiens]	O00139-4
6,380216	6,313448	6,188806	6,240965	6,253164	6,863104	6,958335	6,980174	6,885481	6,981032	FALSK		10	+	CRVO_Control	11	29	7	1	985	4	11	0,000220995	0,001228433	0,658305645	0,320841374	CTBP2	Isoform 2 of C-terminal-binding protein 2 [OS=Homo sapiens]	P56545-2
6,434679	6,262491	6,128509	6,367118	6,169794	6,919059	6,910101	7,001154	7,014972	6,808606	FALSK		12	+	CRVO_Control	7	10	7	1	514	0	7	0,00044457	0,001889422	0,658260345	0,319239203	PPM1H	Protein phosphatase 1H [OS=Homo sapiens]	Q9ULR3
6,411932	6,230721	6,212018	6,31279	6,223929	6,905065	6,909887	6,957088	6,931318	6,965618	FALSK		17	+	CRVO_Control	81	574	81	1	1675	0	81	0,000150297	0,001022939	0,655517006	0,320269599	CLTC	Clathrin heavy chain 1 [OS=Homo sapiens]	Q00610-1
6,272132	6,280766	6,249674	6,377481	6,213919	6,883861	6,962376	6,968412	6,926367	6,92533	FALSK		10	+	CRVO_Control	18	104	2	1	445	2	18	3,58E-05	0,00058679	0,654474926	0,322009858	GDI2	Rab GDP dissociation inhibitor beta [OS=Homo sapiens]	P50395-1
5,995094	6,562487	6,076245	6,347877	6,320552	7,006847	7,00749	6,989883	6,762922	6,877963	FALSK		5			2	3	2	1	563	0	2	0,005621337	0,011728392	0,668570042	0,314861412	MCCC2	Methylcrotonoyl-CoA carboxylase beta chain, mitochondrial [OS=Homo sapiens]	Q9HCC0-1
6,402586	6,255501	6,100137	6,414474	6,207502	7,046578	6,874059	6,954196	6,971544	6,808642	FALSK		18;CHR_HG2213_PATCH	+	CRVO_Control	2	2	2	1	600	0	2	0,000224451	0,001238565	0,654964161	0,319221914	CTIF	Isoform 2 of CBP80/20-dependent translation initiation factor [OS=Homo sapiens]	O43310-2
6,420869	6,452498	6,169231	6,161528	6,16334	7,11025	6,937206	6,907815	6,890584	6,798301	FALSK		12	+	CRVO_Control	3	6	3	1	686	0	3	0,000145834	0,001016282	0,655338192	0,32024007	ACSS3	Acyl-CoA synthetase short-chain family member 3, mitochondrial [OS=Homo sapiens]	Q9H6R3
6,34187	6,220448	6,120336	6,411475	6,244924	6,945181	6,982039	6,90202	6,974414	6,824575	FALSK		5	+	CRVO_Control	2	3	2	1	353	0	2	0,000151258	0,001023965	0,657835484	0,32136443	BRIX1	Ribosome biogenesis protein BRX1 homolog [OS=Homo sapiens]	Q8TDN6
6,227788	6,348336	6,169236	6,352267	6,304026	6,971158	6,831624	6,993228	6,975902	6,872935	FALSK		19	+	CRVO_Control	13	26	13	1	1082	0	13	0,000438553	0,001876471	0,648638916	0,314743937	SUGP2	SURP and G-patch domain-containing protein 2 [OS=Homo sapiens]	Q8IX01-1
6,626833	6,375672	6,072801	6,119865	6,139259	7,03837	6,807104	6,749963	6,909411	7,090514	FALSK		2	+	CRVO_Control	2	11	2	1	445	0	2	0,00327933	0,00779921	0,652186584	0,31000092	SCLY	selenocysteine lyase [OS=Homo sapiens]	Q96I15-1
6,356128	6,335538	6,19924	6,204067	6,323454	6,900835	6,979539	6,905616	6,915606	6,947769	FALSK		3	+	CRVO_Control	7	20	7	1	337	0	7	2,96E-05	0,00054936	0,646187496	0,318231589	ABHD6	Monoacylglycerol lipase ABHD6 [OS=Homo sapiens]	Q9BV23
5,909375	6,42228	6,135465	6,295231	6,513165	6,990079	6,953333	6,898644	6,873139	6,898571	FALSK		7			3	6	3	1	782	0	3	0,005050457	0,010780565	0,667650032	0,314987752	PNPLA8	Calcium-independent phospholipase A2-gamma [OS=Homo sapiens]	Q9NP80-1
6,239809	6,326406	6,280315	6,29094	6,276647	6,947821	6,927518	6,950083	6,918907	6,897137	FALSK		11	+	CRVO_Control	5	13	5	1	336	0	5	4,70E-06	0,000469289	0,645469379	0,319660321	VPS26B	Vacuolar protein sorting-associated protein 26B [OS=Homo sapiens]	Q4G0F5
6,456774	6,226676	6,122048	6,335841	6,274816	6,845957	6,860523	7,04091	6,978094	6,909617	FALSK		8	+	CRVO_Control	3	5	3	1	291	0	3	0,001548539	0,004505382	0,643789291	0,308939831	GTF2E2	transcription initiation factor iie subunit beta [OS=Homo sapiens]	P29084
6,425327	6,281443	6,057034	6,444545	6,191182	6,865288	6,879583	6,920833	7,011046	6,954613	FALSK		10	+	CRVO_Control	12	44	9	1	588	2	12	0,000992902	0,003214424	0,646366405	0,311512474	CAMK2G	Isoform 6 of Calcium/calmodulin-dependent protein kinase type II subunit gamma [OS=Homo sapiens]	Q13555-6
6,623557	6,324062	6,064906	6,208673	6,154099	6,911273	6,920939	6,929505	6,944704	6,931617	FALSK		6	+	CRVO_Control	3	4	3	1	1134	0	3	0,002948329	0,007211042	0,652548313	0,310599109	ANKS1A	Ankyrin repeat and SAM domain-containing protein 1A [OS=Homo sapiens]	Q92625
6,489382	6,301238	6,374168	6,10628	6,140492	6,948557	6,837273	7,017812	6,818757	7,002814	FALSK		2	+	CRVO_Control	2	3	2	1	217	0	2	0,000783838	0,00274887	0,642730427	0,310489098	GCA	Grancalcin [OS=Homo sapiens]	P28676
6,735288	6,083067	6,136698	6,15169	6,154994	6,954906	6,899722	7,0026	6,858983	6,887746	FALSK		14	+	CRVO_Control	4	7	4	1	158	0	4	0,004467192	0,009897795	0,668443966	0,315934427	TRAPPC6B	trafficking protein particle complex subunit 6B [OS=Homo sapiens]	Q86SZ2
6,420381	6,372335	6,062242	6,311563	6,256392	6,86059	6,951076	6,945922	6,934257	6,941664	FALSK		2	+	CRVO_Control	14	46	5	1	351	9	14	0,000901555	0,002998066	0,642119217	0,309815395	PRKACA	cAMP-dependent protein kinase catalytic subunit alpha [OS=Sus scrofa]	P36887
6,539309	6,321616	6,054948	6,18969	6,294579	6,919272	6,87692	6,872496	6,936049	7,021719	FALSK		15	+	CRVO_Control	2	4	2	1	1034	0	2	0,001228162	0,00375481	0,645262814	0,31035931	SLTM	SAFB-like transcription modulator [OS=Homo sapiens]	Q9NWH9-1
6,064963	6,366942	6,122916	6,424515	6,422871	6,974854	6,983853	6,915775	6,919456	6,8313	FALSK		11	+	CRVO_Control	4	5	4	1	570	0	4	0,002233521	0,00589233	0,644606495	0,308048669	ZFP91	E3 ubiquitin-protein ligase ZFP91 [OS=Homo sapiens]	Q96JP5-1
6,380079	6,391397	6,030348	6,320823	6,26386	7,019144	6,81314	6,786098	6,959908	7,017752	FALSK		2	+	CRVO_Control	3	4	3	1	922	0	3	0,000456015	0,001906013	0,64190731	0,31148103	PGAP1	GPI inositol-deacylase [OS=Homo sapiens]	Q75T13
6,345656	6,390844	6,126025	6,302521	6,273409	6,893518	6,930562	6,899646	6,980656	6,928853	FALSK		21	+	CRVO_Control	2	3	2	1	1259	0	2	0,000126587	0,000952163	0,638956261	0,312656098	TRAPPC10	Trafficking protein particle complex subunit 10 [OS=Homo sapiens]	P48553
6,405976	6,320902	6,214714	6,276836	6,239334	6,926565	6,837934	7,019031	6,928874	6,909722	FALSK		7	+	CRVO_Control	39	678	21	1	733	20	39	0,000291834	0,00141839	0,632872772	0,308195802	HSP90AA1	Heat shock protein HSP 90-alpha [OS=Sus scrofa]	O02705
6,214115	6,264252	6,19541	6,302516	6,397589	6,881857	6,543216	7,036347	6,896114	7,140974	FALSK		3	+	CRVO_Control	6	10	3	1	629	0	6	0,002841767	0,007004643	0,624925423	0,298193075	PLS1	Plastin-1 [OS=Homo sapiens]	Q14651
6,142214	6,484288	6,13221	6,310774	6,361931	6,938952	6,927778	6,937206	6,912889	6,909253	FALSK		1	+	CRVO_Control	5	89	2	1	130	4	5	0,000837844	0,002879661	0,638932514	0,308534709	HIST2H2AA4;HIST2H2AA3	Histone H2A type 2-A [OS=Homo sapiens]	Q6FI13
6,512473	6,296457	6,061615	6,19865	6,36104	6,908669	6,992921	7,022244	6,955842	6,725143	FALSK		5			5	34	5	1	127	0	5	0,004924254	0,010606732	0,634917068	0,300488409	SUB1	Activated RNA polymerase II transcriptional coactivator p15 [OS=Homo sapiens]	P53999
6,389194	6,244262	6,298374	6,329237	6,182349	6,844419	7,012753	6,9425	6,867414	6,945045	FALSK		11	+	CRVO_Control	10	20	10	1	1244	0	10	0,000503499	0,002048032	0,633742809	0,307403119	PITPNM1	Membrane-associated phosphatidylinositol transfer protein 1 [OS=Homo sapiens]	O00562
5,744161	6,219169	6,491853	6,825277	5,92837	7,071462	6,925999	6,785289	7,032321	6,785289	FALSK		4			2	4	2	1	366	0	2	0,028794897	0,044374575	0,678306007	0,307902027	USP46	Ubiquitin carboxyl-terminal hydrolase 46 [OS=Homo sapiens]	P62068-1
6,344175	6,531079	6,02554	6,261676	6,263955	6,926435	6,892891	6,904914	6,960002	6,935902	FALSK		7	+	CRVO_Control	5	10	4	1	699	1	5	0,001633467	0,004694825	0,638743877	0,306441459	SRPK2	Isoform 2 of SRSF protein kinase 2 [OS=Homo sapiens]	P78362-2
6,55337	6,419878	6,026114	6,205602	6,20194	7,03143	6,76313	6,953454	6,982917	6,872694	FALSK		22	+	CRVO_Control	3	5	3	1	806	0	3	0,003561027	0,008317839	0,639344501	0,303859628	PLA2G6	85/88 kDa calcium-independent phospholipase A2 [OS=Homo sapiens]	O60733
6,432646	6,295406	6,183912	6,259415	6,285161	6,983544	6,905275	6,887299	6,90146	6,940392	FALSK		16	+	CRVO_Control	9	24	9	1	542	0	9	1,52E-05	0,000480882	0,632285976	0,312193493	TERF2	Telomeric repeat-binding factor 2 [OS=Homo sapiens]	Q15554-3
6,634417	6,021185	6,171038	6,137419	6,296518	6,899485	6,977811	6,862893	6,858053	6,996961	FALSK		7	+	CRVO_Control	3	9	2	1	326	0	3	0,00396758	0,009039119	0,666924953	0,315806742	DNAJB6	DnaJ homolog subfamily B member 6 [OS=Homo sapiens]	O75190
6,027387	6,330667	6,205596	6,385817	6,48483	6,953802	6,957983	6,936634	6,94699	6,818828	FALSK		1	+	CRVO_Control	6	40	5	1	240	0	6	0,002856003	0,00702147	0,635987854	0,303207591	HDGF	hepatoma-derived growth factor [OS=Homo sapiens]	P51858
6,14923	6,41457	6,191146	6,316435	6,389681	6,902631	6,879595	6,966347	6,932362	6,93428	FALSK		14	+	CRVO_Control	12	37	10	1	455	2	12	0,000450555	0,001893628	0,630830574	0,30628962	PPM1A	Isoform 3 of Protein phosphatase 1A [OS=Homo sapiens]	P35813-3
7,646739	5,504621	5,554589	5,539159	5,752213	6,925999	6,996614	6,923625	6,793116	6,968091	FALSK		4			2	2	2	1	250	0	2	0,089638021	0,118197473	0,922024822	0,382025798	KCNIP4	Kv channel-interacting protein 4 [OS=Homo sapiens]	Q6PIL6-1
6,186954	6,469085	6,215986	6,313738	6,274637	6,89412	6,945708	6,925201	6,917284	6,93	FALSK		8	+	CRVO_Control	8	14	7	1	570	1	8	0,000126749	0,000949613	0,630382538	0,308547076	STAU2	Double-stranded RNA-binding protein Staufen homolog 2 [OS=Homo sapiens]	Q9NUL3
6,178859	6,090912	6,263523	6,401342	6,419077	6,836761	6,988586	6,833177	6,935038	6,994681	FALSK	Acetyl [N-Term]	17	+	CRVO_Control	5	11	5	1	507	0	5	0,000604003	0,002324647	0,646905899	0,313134107	TOM1L2	TOM1-like protein 2 [OS=Homo sapiens]	Q6ZVM7
6,19068	6,431946	6,274697	6,274392	6,253551	6,942204	6,842773	6,90286	6,960618	6,941882	FALSK		2	+	CRVO_Control	8	12	8	1	727	0	8	0,00042423	0,001842217	0,633014488	0,307456389	PREPL	prolyl endopeptidase-like [OS=Homo sapiens]	Q4J6C6
6,141869	6,414889	6,292706	6,255703	6,330488	6,928414	6,965405	6,916213	6,824738	6,964354	FALSK		3	+	CRVO_Control	2	10	2	1	1241	0	2	0,000108672	0,000884067	0,632693481	0,309905299	IMPG2	Interphotoreceptor matrix proteoglycan 2 [OS=Homo sapiens]	Q9BZV3
6,284584	6,033316	6,539803	6,350072	6,222783	6,850324	6,912943	7,017276	6,983965	6,831196	FALSK		2	+	CRVO_Control	15	39	7	1	535	1	15	0,000705299	0,002566017	0,633029366	0,306235111	EHD3	EH domain-containing protein 3 [OS=Homo sapiens]	Q9NZN3
6,539075	6,326396	6,061634	6,196685	6,325125	6,882591	6,91284	6,971498	6,922428	6,91937	FALSK		5	+	CRVO_Control	17	134	16	1	372	1	17	0,002442646	0,006273762	0,631962299	0,301950993	H2AFY	Core histone macro-H2A.1 [OS=Homo sapiens]	O75367-1
6,491382	6,403418	6,106213	6,219157	6,242095	6,906762	6,954185	6,989212	6,89495	6,860458	FALSK		5	+	CRVO_Control	10	37	10	1	163	0	10	0,001225057	0,003754398	0,628660393	0,302677536	SKP1	s-phase kinase-associated protein 1 [OS=Homo sapiens]	P63208
6,565105	6,376926	6,236203	6,152284	6,069136	6,955719	6,822728	6,858887	7,008977	6,932122	FALSK		8	+	CRVO_Control	2	4	2	1	137	0	2	0,003044862	0,007394665	0,635755634	0,302856793	GOLGA7	Golgin subfamily A member 7 [OS=Homo sapiens]	Q7Z5G4-1
5,764576	6,389737	6,136475	6,647895	6,398525	6,859222	6,925239	6,867275	6,97728	6,974395	FALSK		5			2	3	2	1	695	0	2	0,006886944	0,013619408	0,653240585	0,307033075	LMBRD2	LMBR1 domain-containing protein 2 [OS=Homo sapiens]	Q68DH5
6,676042	6,303115	6,090803	6,195439	6,149747	6,934172	6,944858	6,63349	6,931617	7,120932	FALSK		14			3	5	3	1	351	0	3	0,005749475	0,011949703	0,629984474	0,297585125	PTGR2	Prostaglandin reductase 2 [OS=Homo sapiens]	Q8N8N7-1
6,487544	6,272241	6,117684	6,382113	6,202574	6,957102	6,901006	6,882944	6,90005	6,959633	FALSK		2	+	CRVO_Control	2	3	2	1	583	0	2	0,000480867	0,001972908	0,627715874	0,304672532	ATL2	Atlastin-2 [OS=Homo sapiens]	Q8NHH9
6,323756	6,085673	5,459998	6,409154	6,274468	6,724884	6,892126	6,761688	6,931157	6,97968	FALSK		3			2	5	2	1	771	0	2	0,008599607	0,016440298	0,747297192	0,346703332	SLC7A14	probable cationic amino acid transporter [OS=Homo sapiens]	Q8TBB6
6,504972	6,452029	6,101019	6,176863	6,223976	6,930725	6,921186	6,879218	6,944273	6,927778	FALSK		12	+	CRVO_Control	7	118	7	1	187	0	7	0,001132721	0,003543025	0,628864479	0,303000632	PEBP1	phosphatidylethanolamine-binding protein 1 [OS=Homo sapiens]	P30086
5,16875	6,567891	6,324507	6,305299	6,673905	6,984812	6,859884	6,918293	6,901115	6,932656	FALSK		1			2	3	2	1	426	0	2	0,067279613	0,091945571	0,711282158	0,311238274	EGLN1	Egl nine homolog 1 [OS=Homo sapiens]	Q9GZT9-1
5,644848	6,579452	6,209264	6,425273	6,465841	6,903853	6,934124	6,95766	6,970386	6,831123	FALSK		17			2	30	2	1	221	0	2	0,017361336	0,028930472	0,654493904	0,301986536	SRSF2	serine/arginine-rich splicing factor 2 [OS=Homo sapiens]	Q01130
6,384562	6,472356	6,02554	6,318745	6,272386	6,909288	6,858037	6,835197	7,011165	6,976101	FALSK		2	+	CRVO_Control	10	29	6	1	359	0	10	0,001138689	0,003558755	0,623240185	0,300373486	GNA11	guanine nucleotide-binding protein subunit alpha-11 [OS=Sus scrofa]	Q2XSV9
6,247777	6,642386	6,11909	6,183997	6,240304	7,133512	7,059803	6,741303	6,780543	6,83608	FALSK		10	+	CRVO_Control	23	153	22	1	558	1	23	0,001147903	0,003581646	0,623537731	0,300488781	GLUD1	Glutamate dehydrogenase 1, mitochondrial [OS=Homo sapiens]	P00367
6,410767	6,349693	6,143546	6,331806	6,258013	6,867892	6,891125	6,95822	6,880671	6,993782	FALSK		17	+	CRVO_Control	3	8	3	1	586	0	3	0,000748577	0,002687361	0,619573021	0,299784031	PTGES3L-AARSD1	Isoform 3 of Alanyl-tRNA editing protein Aarsd1 [OS=Homo sapiens]	Q9BTE6-3
6,088504	6,215291	6,491733	6,610941	6,015609	6,852275	6,931253	6,941369	7,003251	6,859315	FALSK		15	+	CRVO_Control	3	5	3	1	1273	0	3	0,002101271	0,005641584	0,633077049	0,302991115	RASGRF1	Ras-specific guanine nucleotide-releasing factor 1 [OS=Homo sapiens]	Q13972-1
6,573793	6,436897	5,986194	6,159757	6,290939	7,06895	6,870362	6,719707	6,980031	6,926224	FALSK		17	+	CRVO_Control	6	12	6	1	358	0	6	0,000975683	0,003166792	0,623538876	0,300942462	SLC9A3R1	Na(+)/H(+) exchange regulatory cofactor NHE-RF1 [OS=Homo sapiens]	O14745
6,505414	6,382558	6,097288	6,215269	6,289995	6,994325	6,850445	6,928671	6,915878	6,897236	FALSK		10	+	CRVO_Control	10	109	9	1	346	0	10	0,000793046	0,002773467	0,619206238	0,299466337	HNRNPH3	Heterogeneous nuclear ribonucleoprotein H3 [OS=Homo sapiens]	P31942
6,648177	6,34484	6,044543	6,217562	6,180209	7,097702	6,879445	6,780257	6,952219	6,852802	FALSK		7	+	CRVO_Control	4	7	4	1	464	0	4	0,000398242	0,001759597	0,625418663	0,304009849	ASL	argininosuccinate lyase [OS=Homo sapiens]	P04424
5,469881	6,507752	6,199564	6,633419	6,438389	6,877737	7,001831	6,966373	6,822598	6,908355	FALSK		1			9	37	9	1	533	0	9	0,032358493	0,04893141	0,665577698	0,301594306	RPE65	Retinoid isomerohydrolase [OS=Homo sapiens]	Q16518
6,507228	6,506166	6,157869	6,321766	5,957644	7,003342	6,97468	6,978335	6,946029	6,657982	FALSK			+	CRVO_Control	3	5	3	1	99	0	3	0,0006732	0,002506977	0,621938896	0,301156651		Acylphosphatase-2 [OS=Sus scrofa]	P00819
6,028649	6,170505	6,264105	6,450711	6,544113	6,970386	6,845174	7,009288	6,958415	6,786226	FALSK		2			3	5	3	1	207	0	3	0,006160394	0,012535725	0,62228117	0,293833187	UBE2E3	Ubiquitin-conjugating enzyme E2 E3 [OS=Homo sapiens]	Q969T4
6,530955	6,14708	6,174875	6,284391	6,338659	6,900911	6,97153	6,738008	6,923323	7,025949	FALSK		4;CHR_HG2023_PATCH;CHR_HSCHR4_11_CTG12;CHR_HSCHR4_6_CTG12	+	CRVO_Control	3	6	3	1	258	0	3	0,001189849	0,00368222	0,616751766	0,297235061	FRG1	Protein FRG1 [OS=Homo sapiens]	Q14331
6,578445	6,316616	6,087655	6,306526	6,190398	6,86223	6,96272	7,020571	6,819228	6,911652	FALSK		8			2	6	2	1	230	0	2	0,004583817	0,010097183	0,61935215	0,293806387	LYPLA1	Acyl-protein thioesterase 1 [OS=Homo sapiens]	O75608
5,910676	6,274088	6,841403	6,122907	6,111971	6,505697	6,657396	7,71273	6,41692	6,860184	FALSK		10			2	4	2	1	1038	0	2	0,00589062	0,012136597	0,578376389	0,274354765	PITRM1	Isoform 2 of Presequence protease, mitochondrial [OS=Homo sapiens]	Q5JRX3-2
6,525128	6,379303	6,09486	6,251699	6,248861	6,951284	6,880162	6,96347	6,942511	6,841702	FALSK		1;12;6	+	CRVO_Control	8	373	8	1	103	0	8	0,001339199	0,004016536	0,615855408	0,296481315	HIST1H4A;HIST1H4F;HIST1H4D;HIST1H4J;HIST2H4A;HIST2H4B;HIST1H4H;HIST1H4C;HIST4H4;HIST1H4E;HIST1H4I;HIST1H4B;HIST1H4K;HIST1H4L	histone H4 [OS=Homo sapiens]	P62805
6,237411	6,546123	6,177905	6,202539	6,343354	6,901975	6,899054	7,013462	6,914683	6,845476	FALSK		1	+	CRVO_Control	42	147	11	1	1254	30	42	0,001890069	0,005222488	0,613463497	0,294333497	MYO6	Unconventional myosin-VI [OS=Sus scrofa]	Q29122
6,024586	6,022368	6,963474	6,048759	6,242221	6,940167	6,753551	7,270529	6,817623	6,718362	FALSK		12	+	CRVO_Control	2	3	2	1	691	0	2	0,004238738	0,00945795	0,639764595	0,303318511	CALCOCO1	Calcium-binding and coiled-coil domain-containing protein 1 [OS=Homo sapiens]	Q9P1Z2-1
6,356659	6,151936	6,403365	6,405099	6,216649	6,825795	6,954705	6,89662	6,937212	6,951242	FALSK		19	+	CRVO_Control	4	16	4	1	95	0	4	0,000868438	0,002944766	0,606373215	0,293234129	TIMM13	mitochondrial import inner membrane translocase subunit TIM13 [OS=Homo sapiens]	Q9Y5L4
5,936932	6,480797	6,232792	6,41013	6,41942	6,982307	6,779545	6,946434	6,942597	6,905426	FALSK		16;CHR_HSCHR16_3_CTG1			4	10	4	1	480	0	4	0,008184099	0,015797312	0,615247726	0,289367872	DNAJA3	DnaJ homolog subfamily A member 3, mitochondrial [OS=Homo sapiens]	Q96EY1-1
6,29683	6,585331	6,085538	5,95414	6,519574	6,926625	6,899121	6,930038	6,980609	6,800131	FALSK		13			2	2	2	1	666	0	2	0,013179263	0,023130828	0,619022274	0,288491442	SPG20	Spartin [OS=Homo sapiens]	Q8N0X7
6,314401	6,448736	6,089005	6,449673	6,224548	7,053862	6,880027	6,85919	6,846101	6,91284	FALSK		1	+	CRVO_Control	2	5	2	1	551	0	2	0,001588777	0,004590742	0,60513134	0,291017203	CLCC1	chloride channel CLIC-like protein 1 [OS=Homo sapiens]	Q96S66
6,300124	6,110614	6,364573	6,414474	6,35931	6,760221	7,197708	6,841722	6,742815	6,969243	FALSK		2			2	2	2	1	322	0	2	0,010757823	0,019597745	0,592522717	0,277991382	RBKS	ribokinase [OS=Homo sapiens]	Q9H477
6,58508	6,151776	6,114229	6,26219	6,185736	6,761591	6,961501	6,763106	6,882789	7,077769	FALSK		16			2	3	2	1	493	0	2	0,007076674	0,013965472	0,629548931	0,296410785	MLYCD	Malonyl-CoA decarboxylase, mitochondrial [OS=Homo sapiens]	O95822
6,421935	6,395519	6,182768	6,325502	6,230525	6,914663	6,898418	6,906283	6,931212	6,908315	FALSK		19	+	CRVO_Control	37	143	26	1	977	11	37	0,000198304	0,00116193	0,600528431	0,293516962	AP2A1	AP-2 complex subunit alpha-1 [OS=Homo sapiens]	O95782
6,314692	6,053813	6,26298	6,53266	6,359682	6,882446	6,859823	6,923925	6,837899	7,043233	FALSK		11;CHR_HG2217_PATCH	+	CRVO_Control	5	8	5	1	219	0	5	0,001968855	0,005377471	0,604699898	0,290170212	TRAPPC4	Trafficking protein particle complex subunit 4 [OS=Homo sapiens]	Q9Y296
6,501185	6,450064	6,200195	6,167717	6,205213	6,910429	6,932459	6,963051	6,821917	6,921529	FALSK		11	+	CRVO_Control	14	66	14	1	414	0	14	0,000893014	0,002990652	0,605001831	0,292522773	CADM1	Isoform 5 of Cell adhesion molecule 1 [OS=Homo sapiens]	Q9BY67-5
6,732742	6,399003	5,64708	5,7238	6,508469	7,093044	6,703326	6,888066	6,84999	6,907612	FALSK		7			2	2	2	1	803	0	2	0,028393717	0,043827598	0,686188889	0,31127746	RASA4B	Ras GTPase-activating protein 4B [OS=Homo sapiens]	C9J798
6,289239	6,356504	6,223025	6,343403	6,357465	6,939292	6,80786	6,919453	6,919877	6,964525	FALSK		14	+	CRVO_Control	6	35	6	1	318	0	6	0,000136255	0,000985771	0,596274281	0,292077627	APEX1	DNA-(apurinic or apyrimidinic site) lyase [OS=Homo sapiens]	P27695
6,620581	6,354972	5,990548	6,309256	6,210527	6,934206	6,932207	6,862314	6,961083	6,85848	FALSK		6	+	CRVO_Control	5	14	4	1	282	1	5	0,002396645	0,006197601	0,612481499	0,293108312	SNRPA	U1 SMALL NUCLEAR RIBONUCLEOPROTEIN A [OS=Sus scrofa]	Q06AA4
6,532114	6,389548	6,064165	6,245816	6,295384	6,997549	6,994451	6,993651	6,864098	6,673257	FALSK		2	+	CRVO_Control	3	6	3	1	367	0	3	0,003095116	0,007449896	0,599195576	0,286161707	CCDC104;CFAP36	Isoform 2 of Cilia- and flagella-associated protein 36 [OS=Homo sapiens]	Q96G28-2
6,380178	6,483207	6,069685	6,214225	6,393497	6,834886	6,860909	6,934764	6,941865	6,967321	FALSK			+	CRVO_Control	9	31	3	1	193	0	9	0,002507148	0,006383208	0,599790573	0,287143626	HPCAL1	Hippocalcin-like protein 1 [OS=Sus scrofa]	Q06AT0
6,488863	6,531632	6,043309	6,215732	6,205289	6,868459	6,983732	6,8208	6,951233	6,895589	FALSK		5	+	CRVO_Control	2	4	2	1	140	0	2	0,001623749	0,004677533	0,60699749	0,291815837	ATG12	Ubiquitin-like protein ATG12 [OS=Homo sapiens]	O94817-1
6,297955	6,419791	6,119933	6,343408	6,388869	6,931999	6,898798	6,939646	6,909735	6,86411	FALSK		12	+	CRVO_Control	11	41	2	1	337	0	11	0,000723125	0,002613313	0,594866371	0,288280624	PPP1CC	Isoform Gamma-2 of Serine/threonine-protein phosphatase PP1-gamma catalytic subunit [OS=Homo sapiens]	P36873-2
6,503552	6,346903	6,025562	6,26464	6,370733	6,95964	6,985828	6,967531	6,906136	6,7037	FALSK		10	+	CRVO_Control	4	10	4	1	238	0	4	0,004265649	0,009501219	0,602288723	0,286395307	SMNDC1	Survival of motor neuron-related-splicing factor 30 [OS=Homo sapiens]	O75940
6,44791	6,580447	6,153805	6,037821	6,301953	6,966938	7,049849	6,893605	6,844235	6,776104	FALSK		15	+	CRVO_Control	2	2	2	1	667	0	2	0,001077723	0,00341324	0,601758671	0,290526561	TUBGCP4	gamma-tubulin complex component 4 [OS=Homo sapiens]	Q9UGJ1
6,177125	6,757452	5,571513	6,150162	6,608924	6,985197	7,042095	6,800595	6,789506	6,895287	FALSK		18			2	3	2	1	162	0	2	0,021377144	0,034500107	0,649500656	0,298354905	CAV2	Caveolin-2 [OS=Sus scrofa]	Q2QLE2
6,272243	6,304602	6,271342	6,401549	6,280319	6,604373	6,943995	6,642192	7,026701	7,18974	FALSK		3			2	2	2	1	722	0	2	0,005339993	0,011252871	0,575389194	0,273385501	NCKIPSD	NCK-interacting protein with SH3 domain [OS=Homo sapiens]	Q9NZQ3-1
6,57213	6,351212	6,130207	6,280746	6,220129	6,945961	6,894089	6,914681	6,921813	6,866635	FALSK		2	+	CRVO_Control	11	39	2	1	281	9	11	0,000919695	0,003039725	0,597751045	0,289058682	MAPRE3	Microtubule-associated protein RP/EB family member 3 [OS=Homo sapiens]	Q9UPY8
6,468319	6,077723	6,019192	6,484938	6,432712	6,759896	6,910443	7,011929	6,958888	6,854849	FALSK		8			3	5	3	1	583	0	3	0,010426946	0,019142156	0,602624416	0,282593331	NUDCD1	NudC domain-containing protein 1 [OS=Homo sapiens]	Q96RS6
6,360596	6,456126	6,186857	6,327167	6,247908	6,799591	7,001127	6,904649	6,870934	6,958813	FALSK		1	+	CRVO_Control	4	12	3	1	454	1	4	0,000389687	0,001733922	0,591291904	0,287900335	CCBL2;KYAT3	Kynurenine--oxoglutarate transaminase 3 [OS=Homo sapiens]	Q6YP21
6,078346	6,412384	6,298141	6,384562	6,360045	6,908755	6,923141	6,840315	6,904241	6,954195	FALSK		X	+	CRVO_Control	11	19	11	1	926	0	11	0,000547209	0,002169948	0,599433422	0,291053248	CASK	peripheral plasma membrane protein CASK [OS=Homo sapiens]	O14936
6,377897	6,581337	6,239245	6,143316	6,194937	6,937921	6,810511	6,83305	6,909638	7,016859	FALSK		7			2	8	2	1	148	0	2	0,004623867	0,010155898	0,594249153	0,282451503	SSBP1	Single-stranded DNA-binding protein, mitochondrial [OS=Homo sapiens]	Q04837
6,568221	6,451911	6,073539	6,261095	6,191778	6,95826	6,912246	6,874674	6,898377	6,894785	FALSK		11	+	CRVO_Control	4	10	4	1	229	0	4	0,001418679	0,004224834	0,59835968	0,288203825	PAFAH1B2	platelet-activating factor acetylhydrolase IB subunit beta [OS=Homo sapiens]	P68402-1
6,429519	6,291318	6,258035	6,332068	6,284441	6,92302	6,887746	6,947197	6,839202	6,937792	FALSK			+	CRVO_Control	6	40	6	1	416	0	6	0,000110127	0,000888278	0,58791523	0,288369196		Isoform 2 of Neutral cholesterol ester hydrolase 1 [OS=Homo sapiens]	Q6PIU2-2
6,657936	6,173664	6,140461	6,425703	6,10463	6,813951	7,017591	6,854739	6,903999	6,929729	FALSK		1			6	18	5	1	133	1	6	0,009571551	0,017954355	0,603523064	0,283418488	FABP3	Fatty acid-binding protein, heart [OS=Homo sapiens]	P05413
6,140339	6,443606	6,157066	6,276953	6,465392	6,741692	7,04171	6,895496	6,858866	6,946626	FALSK		8	+	CRVO_Control	4	8	4	1	1048	0	4	0,000126531	0,000953637	0,600206757	0,294076553	PSD3	PH and SEC7 domain-containing protein 3 [OS=Homo sapiens]	Q9NYI0-1
6,462873	6,318288	6,212319	6,389392	6,124216	6,844552	6,838707	6,945893	6,77541	7,082691	FALSK		6			3	4	3	1	542	0	3	0,005793101	0,012000898	0,596032619	0,28235716	TULP1	Tubby-related protein 1 [OS=Homo sapiens]	O00294
6,414449	6,378139	6,227536	6,313826	6,260955	6,906057	6,87958	6,996683	6,918775	6,823933	FALSK		12	+	CRVO_Control	6	36	6	1	160	0	6	0,000308943	0,001467671	0,586024475	0,285831406	PTGES3	Prostaglandin E synthase 3 [OS=Homo sapiens]	Q15185
6,444885	6,404834	6,139904	6,258485	6,336666	6,874878	6,906896	7,03782	6,920833	6,776581	FALSK		19	+	CRVO_Control	3	7	3	1	480	0	3	0,002664708	0,006690005	0,586446571	0,280828437	RBM42	RNA-binding protein 42 [OS=Homo sapiens]	Q9BTD8-1
6,375103	6,287328	6,301407	6,294888	6,329391	6,885212	6,90189	6,882346	6,949615	6,900547	FALSK		11	+	CRVO_Control	5	14	4	1	341	1	5	1,67E-05	0,000499409	0,586298466	0,289669532	ARFIP2	Arfaptin-2 [OS=Homo sapiens]	P53365
6,346887	6,414869	6,142629	6,321003	6,371218	6,916181	6,872726	6,883802	6,882555	6,972561	FALSK		4	+	CRVO_Control	5	8	5	1	514	0	5	0,000211289	0,001202698	0,586244011	0,286585938	PLRG1	Pleiotropic regulator 1 [OS=Homo sapiens]	O43660-1
5,477734	6,678566	6,127984	6,53532	6,464407	6,942686	6,846723	6,908872	6,921396	6,8989	FALSK		10			3	5	3	1	773	0	3	0,046333544	0,066685826	0,646913147	0,290501851	YME1L1	ATP-dependent zinc metalloprotease YME1L1 [OS=Homo sapiens]	Q96TA2-1
6,462498	6,379095	6,215412	6,296034	6,24929	6,864799	6,88612	6,982459	6,852892	6,935337	FALSK		16	+	CRVO_Control	8	25	8	1	625	0	8	0,000832819	0,00287281	0,583855534	0,282786487	KARS	Isoform Mitochondrial of Lysine--tRNA ligase [OS=Homo sapiens]	Q15046-2
6,449777	6,611844	6,114567	6,293617	6,076801	6,972383	6,843606	7,016119	6,923617	6,755739	FALSK		6			3	9	3	1	159	0	3	0,005617879	0,011727633	0,592971706	0,281107974	SNRPC	U1 small nuclear ribonucleoprotein C [OS=Homo sapiens]	P09234
5,992053	6,835239	5,789868	5,885142	6,753348	6,460082	7,341611	6,493584	6,585164	7,345992	FALSK		10	+	CRVO_Control	5	11	5	1	147	0	5	0,000252655	0,001292598	0,594156456	0,290060536	NUDT2	Bis(5'-nucleosyl)-tetraphosphatase [asymmetrical] [OS=Sus scrofa]	P50584
6,360363	6,372355	6,257707	6,295603	6,325912	6,86859	6,87831	6,934047	6,87635	6,960028	FALSK		1	+	CRVO_Control	6	11	6	1	225	0	6	6,71E-05	0,000708644	0,581077194	0,285711149	BCAS2	Pre-mRNA-splicing factor spf27 [OS=Homo sapiens]	O75934
6,530942	6,403728	6,145434	6,300119	6,20652	6,882863	6,876332	6,952881	6,954752	6,849205	FALSK	Acetyl [N-Term]	19	+	CRVO_Control	5	17	5	1	407	0	5	0,001758899	0,004979825	0,585858059	0,281806861	DAZAP1	DAZ-associated protein 1 [OS=Homo sapiens]	Q96EP5
6,478609	6,510961	6,0592	6,306526	6,224213	6,861494	6,933559	6,92276	6,899026	6,903845	FALSK		3	+	CRVO_Control	10	17	8	1	1236	0	10	0,002570037	0,00649534	0,588235283	0,281764131	CAND2	Cullin-associated NEDD8-dissociated protein 2 [OS=Homo sapiens]	O75155-1
5,960292	6,62677	6,165106	6,396294	6,369789	6,972874	6,912471	6,789275	6,816639	7,011212	FALSK		11			6	21	6	1	427	0	6	0,008371119	0,016117275	0,596844292	0,281106851	ACAT1	Acetyl-CoA acetyltransferase, mitochondrial [OS=Homo sapiens]	P24752
6,395394	6,334469	6,245077	6,413458	6,231798	6,774459	6,786549	7,02755	6,969785	6,941066	FALSK		11	+	CRVO_Control	3	12	3	1	451	0	3	0,001610931	0,004647669	0,575842285	0,277407177	SLC37A4	Isoform 2 of Glucose-6-phosphate exchanger SLC37A4 [OS=Homo sapiens]	O43826-2
6,233507	6,549767	6,108506	6,364327	6,330972	6,878562	6,724884	6,853416	6,930683	7,102254	FALSK		12			24	934	2	1	449	0	24	0,00573525	0,011926677	0,580544281	0,275435305	TUBA1C	Tubulin alpha-1C chain [OS=Homo sapiens]	Q9BQE3
6,383244	6,269543	6,515531	6,166399	6,270408	6,986758	6,838269	6,992294	6,719084	6,957077	FALSK		11	+	CRVO_Control	4	8	4	1	208	0	4	7,23E-05	0,000722976	0,577671528	0,283975376	PLEKHB1	Isoform 2 of Pleckstrin homology domain-containing family B member 1 [OS=Homo sapiens]	Q9UF11-2
5,77119	6,791819	5,969165	6,271692	6,448998	6,850499	7,054355	6,84116	6,964426	6,785028	FALSK		17			3	6	3	1	356	0	3	0,014049621	0,024465831	0,64852066	0,300856532	CDC42EP4	Cdc42 effector protein 4 [OS=Homo sapiens]	Q9H3Q1
6,459408	6,393133	6,126125	6,395549	6,238829	6,914972	6,848619	6,853984	6,94421	6,950113	FALSK		19	+	CRVO_Control	4	12	4	1	142	0	4	0,000625757	0,002379383	0,579770947	0,281495465	AP2S1	AP-2 complex subunit sigma [OS=Homo sapiens]	P53680
6,770654	6,289952	6,015937	6,202406	6,243083	6,882638	6,86894	6,885082	6,959413	6,915825	FALSK		4			4	148	3	1	128	0	4	0,010185214	0,01882601	0,597973251	0,280663724	H2AFZ	Histone H2A.Z [OS=Homo sapiens]	P0C0S5
6,343791	6,346773	6,273278	6,312854	6,359157	6,921354	6,843994	6,965782	6,882638	6,897433	FALSK		19	+	CRVO_Control	4	9	4	1	188	0	4	6,06E-05	0,000679325	0,575069809	0,282924974	TRAPPC5	Trafficking protein particle complex subunit 5 [OS=Homo sapiens]	Q8IUR0
6,646555	6,211213	6,187954	6,199372	6,338402	6,842977	6,928288	7,027891	6,812791	6,891089	FALSK		11			3	10	3	1	707	0	3	0,005754871	0,011947818	0,583908081	0,276935684	C2CD2L	Isoform 2 of C2 domain-containing protein 2-like [OS=Homo sapiens]	O14523-2
6,327216	6,306517	6,335633	6,407942	6,240289	6,938208	6,790651	6,841432	6,917362	7,011422	FALSK		5	+	CRVO_Control	4	7	4	1	1732	0	4	0,000419101	0,001828323	0,576295376	0,280649716	RICTOR	Isoform 3 of Rapamycin-insensitive companion of mTOR [OS=Homo sapiens]	Q6R327-3
7,061362	6,249827	5,944592	6,087238	5,965045	6,847919	7,004473	6,964592	6,934107	6,74616	FALSK		7			5	9	5	1	336	0	5	0,042866623	0,062454791	0,637836933	0,287601067	NT5C3;NT5C3A	Cytosolic 5'-nucleotidase 3A [OS=Homo sapiens]	Q9H0P0-4
6,481369	6,387181	6,078382	6,283247	6,381066	6,834786	6,985477	6,856477	6,70182	7,099568	FALSK		16	+	CRVO_Control	3	6	3	1	879	0	3	0,002245982	0,005912861	0,573376846	0,275338506	PDPR	Pyruvate dehydrogenase phosphatase regulatory subunit, mitochondrial [OS=Homo sapiens]	Q8NCN5
6,654606	6,321754	6,24437	6,006339	6,318983	6,735807	6,932736	7,064805	6,794132	6,929935	FALSK		7			3	5	3	1	400	0	3	0,011772988	0,021102316	0,582273102	0,273033787	CYTH3	cytohesin-3 [OS=Homo sapiens]	O43739
6,46471	6,401242	6,14411	6,274103	6,33257	6,816233	6,901455	6,935448	6,878945	6,970316	FALSK		17	+	CRVO_Control	5	16	4	1	185	0	5	0,001398691	0,004181732	0,57713232	0,278378582	CBX1	Chromobox protein homolog 1 [OS=Homo sapiens]	P83916
6,345183	6,416164	6,189825	6,29094	6,399171	6,866661	6,683696	6,955359	7,103288	6,864186	FALSK		17			3	4	3	1	478	0	3	0,004868174	0,010527808	0,566381264	0,269648863	BTBD17	BTB/POZ domain-containing protein 17 [OS=Homo sapiens]	A6NE02
6,09514	6,329989	6,225154	6,342773	6,411221	6,812092	7,016453	6,624818	6,854928	7,039765	FALSK		16	+	CRVO_Control	2	5	2	1	330	0	2	0,00055983	0,002197012	0,588755989	0,285968145	HSDL1	Inactive hydroxysteroid dehydrogenase-like protein 1 [OS=Homo sapiens]	Q3SXM5
6,623036	6,363033	6,098114	6,259631	6,148462	7,08882	6,771145	6,979126	6,912652	6,660052	FALSK		17	+	CRVO_Control	2	3	2	1	377	0	2	0,002310813	0,006029106	0,583903503	0,280103686	DHRS13	Dehydrogenase/reductase SDR family member 13 [OS=Homo sapiens]	Q6UX07
6,408638	6,328078	6,160344	6,434566	6,297092	6,82039	6,898815	6,851511	6,916625	7,004888	FALSK		1	+	CRVO_Control	3	7	3	1	292	0	3	0,000575533	0,002235497	0,572702122	0,278331868	FAM54B;MTFR1L	Mitochondrial fission regulator 1-like [OS=Homo sapiens]	Q9H019-1
6,459398	6,421798	6,068511	6,343922	6,323898	6,905482	6,839184	6,897839	6,92518	6,929679	FALSK		11	+	CRVO_Control	8	14	4	1	788	4	8	0,00140906	0,004209413	0,575967503	0,277817474	MARK2	Serine/threonine-protein kinase MARK2 [OS=Homo sapiens]	Q7KZI7-1
6,512597	6,323643	6,203902	6,295384	6,299184	6,852963	6,872766	6,88263	6,905675	6,983582	FALSK		X	+	CRVO_Control	14	24	14	1	1046	0	14	0,00081829	0,002835592	0,572581196	0,277532579	OGT	UDP-N-acetylglucosamine--peptide N-acetylglucosaminyltransferase 110 kDa subunit [OS=Homo sapiens]	O15294
6,246873	6,3924	6,341826	6,171789	6,472093	6,950494	6,865336	7,045891	6,814596	6,800313	FALSK		8	+	CRVO_Control	10	16	9	1	538	1	10	0,001511744	0,004432344	0,570329762	0,275013231	SNTB1	Beta-1-syntrophin [OS=Homo sapiens]	Q13884
6,326366	6,496168	6,085923	6,270897	6,41521	7,025584	6,962181	6,747081	6,839096	6,895166	FALSK		1	+	CRVO_Control	3	5	3	1	389	0	3	0,000252296	0,00129601	0,574908733	0,280881286	OSCP1	Protein OSCP1 [OS=Homo sapiens]	Q8WVF1-1
6,494829	6,328226	6,134423	6,365854	6,321012	6,827013	6,924617	6,949306	6,869981	6,920574	FALSK		1	+	CRVO_Control	6	13	6	1	253	0	6	0,001893865	0,005229164	0,569429111	0,273995738	DNAJC8	DnaJ homolog subfamily C member 8 [OS=Homo sapiens]	O75937
5,613019	6,507002	6,300597	6,646791	6,398273	6,864782	7,015815	7,073245	6,614025	6,878741	FALSK		12			3	11	3	1	318	0	3	0,046574158	0,066905128	0,596185017	0,269832106	RDH5	11-cis retinol dehydrogenase [OS=Homo sapiens]	Q92781
6,374578	6,316394	6,195984	6,365307	6,409382	6,887995	6,86044	6,887826	6,852781	6,998857	FALSK		9	+	CRVO_Control	10	21	10	1	356	0	10	9,52E-05	0,000824076	0,565250969	0,277639777	STOML2	Stomatin-like protein 2, mitochondrial [OS=Homo sapiens]	Q9UJZ1
6,493463	6,109999	6,2885	6,297246	6,434612	6,705671	6,932262	7,026299	6,80754	6,97347	FALSK	Acetyl [N-Term]	X			5	29	4	1	213	0	5	0,005965868	0,01226497	0,564284706	0,267957672	RAB39B	Ras-related protein Rab-39B [OS=Homo sapiens]	Q96DA2
6,547576	6,06492	5,981313	6,118611	6,470065	6,865249	6,624812	6,83919	6,918585	7,028843	FALSK		12	+	CRVO_Control	2	3	2	1	476	0	2	0,003083404	0,007435868	0,618838596	0,295122861	RAB3IP	Rab-3A-interacting protein [OS=Homo sapiens]	Q96QF0-1
6,578175	6,382404	6,146472	6,275193	6,257031	6,870899	6,940751	6,866004	6,870975	6,938066	FALSK		12	+	CRVO_Control	6	55	6	1	261	0	6	0,001610263	0,004649283	0,569484043	0,274455895	ERP29	Endoplasmic reticulum resident protein 29 [OS=Homo sapiens]	P30040-1
6,06888	6,516061	6,239061	6,227206	6,533381	6,929537	6,813065	6,595043	6,968653	7,084622	FALSK		13			3	4	2	1	1148	0	3	0,006574796	0,013173917	0,561266041	0,266229062	ATP8A2	Phospholipid-transporting ATPase IB [OS=Homo sapiens]	Q9NTI2
6,283018	6,278666	6,23156	6,356984	6,476879	6,976369	6,895614	6,857213	6,927501	6,798933	FALSK		6	+	CRVO_Control	4	5	4	1	1692	0	4	0,000903969	0,003003459	0,565704536	0,27408258	RIMS1	Regulating synaptic membrane exocytosis protein 1 [OS=Homo sapiens]	Q86UR5-1
6,592879	6,390266	6,153754	6,160166	6,337175	7,065224	6,828241	6,92518	6,797539	6,852781	FALSK		22	+	CRVO_Control	18	729	5	1	449	0	18	0,000756662	0,002701043	0,566944981	0,275051313	TUBA8	Tubulin alpha-8 chain [OS=Homo sapiens]	Q9NY65
6,494861	6,345383	6,246978	6,297073	6,220297	6,992779	6,927681	6,819143	6,880518	6,838027	FALSK		19	+	CRVO_Control	7	18	3	1	483	0	7	8,55E-06	0,000463141	0,570711422	0,282564158	GSK3A	Glycogen synthase kinase-3 alpha [OS=Homo sapiens]	P49840
6,416163	6,343256	6,238802	6,348918	6,322181	6,900316	6,900425	6,894818	6,873441	6,905383	FALSK		8	+	CRVO_Control	20	40	12	1	1849	7	20	4,18E-05	0,000612541	0,561012554	0,276502746	ARFGEF1	Brefeldin A-inhibited guanine nucleotide-exchange protein 1 [OS=Homo sapiens]	Q9Y6D6
6,048417	6,517736	6,138301	6,392989	6,523291	7,047669	6,773149	6,873089	6,925775	6,836407	FALSK		19;CHR_HSCHR19_1_CTG3_1			4	11	4	1	463	0	4	0,014536149	0,025116928	0,567070866	0,265305712	LSM14A	protein LSM14 homolog A [OS=Homo sapiens]	Q8ND56
6,574404	6,390599	6,314696	6,343408	6,015694	6,82273	6,764208	7,062856	6,972692	6,834155	FALSK		14			3	4	3	1	802	0	3	0,006710575	0,013368255	0,563568211	0,267185609	TRIM9	Isoform 4 of E3 ubiquitin-protein ligase TRIM9 [OS=Homo sapiens]	Q9C026-4
6,312427	6,36282	6,257377	6,386287	6,3733	6,851611	6,836	6,887463	6,900859	6,995469	FALSK		9	+	CRVO_Control	10	79	9	1	215	0	10	5,40E-05	0,000649929	0,555838394	0,273731341	RAB14	Ras-related protein Rab-14 [OS=Homo sapiens]	P61106
6,825305	6,281622	6,103896	6,193427	6,159836	6,828938	6,934754	6,848985	6,946604	6,909838	FALSK		1			5	21	5	1	268	0	5	0,016239993	0,027472474	0,581006622	0,270796311	ANP32E	Acidic leucine-rich nuclear phosphoprotein 32 family member E [OS=Homo sapiens]	Q9BTT0
6,541095	6,46919	6,302696	6,105786	6,172407	6,875743	6,871758	6,882609	6,829301	6,984128	FALSK		1	+	CRVO_Control	3	6	2	1	521	1	3	0,003300483	0,007829869	0,570472813	0,272826646	MEF2D	Myocyte-specific enhancer factor 2D [OS=Homo sapiens]	Q14814-1
6,850051	6,301609	6,056011	6,245365	6,059892	7,091578	6,823929	6,89178	6,736637	6,885852	FALSK		11			12	29	4	1	842	0	12	0,006511734	0,013089069	0,583369637	0,276195083	PYGM	Glycogen phosphorylase, muscle form [OS=Homo sapiens]	P11217
6,075572	6,569759	6,239859	6,420217	6,348572	6,901258	6,91587	6,927702	6,874017	6,850486	FALSK		19	+	CRVO_Control	7	17	7	1	183	0	7	0,002790865	0,00692873	0,563070869	0,269952357	UBE2M	NEDD8-conjugating enzyme Ubc12 [OS=Homo sapiens]	P61081
6,530451	5,994711	6,299928	6,445922	6,293495	6,867504	6,727304	6,945922	6,836294	7,052514	FALSK		22	+	CRVO_Control	5	10	3	1	916	0	5	0,002855577	0,007024979	0,573006153	0,274445244	OSBP2	Oxysterol-binding protein 2 [OS=Homo sapiens]	Q969R2
6,061776	6,407693	6,475733	6,617651	6,055283	6,70044	7,098032	6,811214	7,004501	6,820179	FALSK		3	+	CRVO_Control	2	2	2	1	557	0	2	0,002724969	0,00681422	0,563246059	0,270104117	NT5DC2	Isoform 2 of 5'-nucleotidase domain-containing protein 2 [OS=Homo sapiens]	Q9H857-2
6,387239	6,23173	6,372535	6,197366	6,495818	6,863072	6,929146	6,83214	6,893335	6,945191	FALSK		2	+	CRVO_Control	6	9	6	1	783	0	6	0,000651981	0,002447187	0,555639458	0,270024202	PNPT1	Polyribonucleotide nucleotidyltransferase 1, mitochondrial [OS=Homo sapiens]	Q8TCS8
6,633649	6,38927	6,120497	6,226765	6,27675	6,815141	6,95556	6,973773	6,945306	6,760156	FALSK		1			7	16	7	1	330	0	7	0,007964824	0,015444833	0,560600948	0,265173954	ZRANB2	Zinc finger Ran-binding domain-containing protein 2 [OS=Homo sapiens]	O95218-1
6,61155	6,553644	6,067043	6,170415	6,203045	6,877028	6,954995	6,84858	6,866642	6,889951	FALSK		22			2	5	2	1	297	0	2	0,004597796	0,010116219	0,566299629	0,269813286	TST	thiosulfate sulfurtransferase [OS=Homo sapiens]	Q16762
6,491403	6,321978	6,293414	6,339969	6,25051	6,79329	6,949399	6,856826	6,840862	7,009378	FALSK		17	+	CRVO_Control	4	8	4	1	832	0	4	0,001873469	0,005203166	0,550496292	0,265245451	VPS53	Isoform 4 of Vacuolar protein sorting-associated protein 53 homolog [OS=Homo sapiens]	Q5VIR6-4
6,580163	6,548417	6,01179	6,220052	6,250734	6,888217	6,88701	6,953135	6,93837	6,78162	FALSK		1			2	8	2	1	249	0	2	0,008868908	0,016844704	0,567439079	0,267777314	CHTOP	Isoform 2 of Chromatin target of PRMT1 protein [OS=Homo sapiens]	Q9Y3Y2-3
6,280317	6,435462	6,314532	6,330899	6,350488	6,878928	6,877131	6,940136	6,8875	6,877711	FALSK		15	+	CRVO_Control	22	754	4	1	531	25	22	6,66E-05	0,000705151	0,54994154	0,270651261	PKM	Isoform M1 of Pyruvate kinase PKM [OS=Homo sapiens]	P14618-2
5,917567	6,506821	6,404241	6,423318	6,329706	6,889737	6,91228	6,882526	6,908385	6,849423	FALSK		16			2	3	2	1	556	0	2	0,004913568	0,010595755	0,572139645	0,272224314	PDPK1	3-phosphoinositide-dependent protein kinase 1 [OS=Homo sapiens]	O15530-1
6,611898	6,223511	6,355753	6,289252	6,195204	6,837008	6,860458	6,9546	6,899552	6,903719	FALSK		3	+	CRVO_Control	4	6	4	1	609	0	4	0,002809113	0,00695581	0,555943489	0,266655138	PDE12	2',5'-phosphodiesterase 12 [OS=Homo sapiens]	Q6L8Q7-1
6,444956	6,371127	6,169785	6,366008	6,345809	6,857686	6,883096	6,953276	6,903511	6,848598	FALSK		2	+	CRVO_Control	3	4	3	1	211	0	3	0,000900823	0,002998263	0,549696064	0,266567683	UBE2F	Isoform 2 of NEDD8-conjugating enzyme UBE2F [OS=Homo sapiens]	Q969M7-2
6,470707	6,422065	6,058196	6,397523	6,331432	6,944246	6,897404	6,878457	6,894918	6,838802	FALSK		16	+	CRVO_Control	7	20	5	1	1336	0	7	0,001140269	0,003560758	0,554780865	0,268440261	MAPK8IP3	C-Jun-amino-terminal kinase-interacting protein 3 [OS=Homo sapiens]	Q9UPT6
6,596035	6,403444	6,07334	6,442085	6,089395	7,034393	6,892097	6,920331	6,816248	6,774496	FALSK		17	+	CRVO_Control	2	4	2	1	446	0	2	0,002897701	0,007105553	0,566652966	0,271484353	RUNDC3A	RUN domain-containing protein 3A [OS=Homo sapiens]	Q59EK9-1
6,098289	6,567708	6,237284	6,397378	6,368595	6,90684	6,834154	6,870797	6,902485	6,939527	FALSK		19	+	CRVO_Control	3	7	3	1	441	0	3	0,00325047	0,007745149	0,556909752	0,266662733	UBXN6	UBX domain-containing protein 6 [OS=Homo sapiens]	Q9BZV1
6,69165	6,382765	6,069267	6,247025	6,227656	6,830221	6,997744	6,902648	6,870533	6,840924	FALSK		7			5	10	5	1	505	0	5	0,007855819	0,015241253	0,56474123	0,267082585	WASL;ASB15	Neural Wiskott-Aldrich syndrome protein [OS=Homo sapiens]	O00401
6,435694	6,528238	6,106901	6,356414	6,265286	6,886859	6,839202	6,947186	6,939505	6,834787	FALSK		20	+	CRVO_Control	11	120	6	1	246	0	11	0,003231019	0,007708493	0,551001167	0,263970109	YWHAB	14-3-3 protein beta/alpha [OS=Homo sapiens]	P31946
6,574945	6,412446	6,077138	6,341313	6,270328	6,888463	7,026247	6,843279	6,913987	6,764266	FALSK		6	+	CRVO_Control	2	4	2	1	426	0	2	0,001750375	0,004959397	0,552014351	0,266123465	ACAT2	Isoform 2 of Acetyl-CoA acetyltransferase, cytosolic [OS=Homo sapiens]	Q9BWD1-2
6,498237	6,370439	6,118862	6,340184	6,368573	6,814771	7,0818	6,790247	6,878645	6,857938	FALSK		4	+	CRVO_Control	2	4	2	1	76	0	2	0,001491381	0,004389616	0,545421028	0,263443853	PKIA	cAMP-dependent protein kinase inhibitor alpha [OS=Sus scrofa]	Q71U53
6,513175	5,972493	6,347453	6,327293	6,296807	6,803159	6,848709	6,847008	6,951995	6,912712	FALSK		17	+	CRVO_Control	6	12	3	1	835	0	6	0,003653934	0,008513868	0,581272221	0,277418502	NLGN2	Neuroligin-2 [OS=Homo sapiens]	Q8NFZ4
6,688994	6,362734	6,084217	6,384286	6,126794	6,945448	6,870352	6,941273	6,900867	6,783932	FALSK		X			3	4	3	1	1616	0	3	0,004775328	0,010374366	0,558969116	0,26635324	SHROOM2	Protein Shroom2 [OS=Homo sapiens]	Q13796
6,181777	6,474617	6,273579	6,445093	6,327336	6,97519	6,828403	6,932542	6,950594	6,742009	FALSK		20	+	CRVO_Control	3	5	3	1	431	0	3	0,002486182	0,006338343	0,5452672	0,262076892	CSTF1	Cleavage stimulation factor subunit 1 [OS=Homo sapiens]	Q05048
6,397445	6,414659	6,197424	6,368928	6,343407	6,787786	6,950953	6,892716	6,863556	6,946322	FALSK			+	CRVO_Control	11	23	3	1	617	7	11	0,000445221	0,001887954	0,543894482	0,26515668	ETFDH	Electron transfer flavoprotein-ubiquinone oxidoreductase, mitochondrial [OS=Sus scrofa]	P55931
6,548354	6,416148	6,146434	6,320113	6,275169	6,91048	6,840285	6,914681	6,894767	6,886915	FALSK		3	+	CRVO_Control	15	85	13	1	404	2	15	0,001582676	0,0045766	0,548182011	0,264589088	PRKAR2A	cAMP-dependent protein kinase type II-alpha regulatory subunit [OS=Homo sapiens]	P13861
6,421563	6,367122	6,278293	6,366313	6,295784	6,912186	6,972869	6,816967	6,873438	6,863284	FALSK		7	+	CRVO_Control	4	11	4	1	184	0	4	1,27E-05	0,000500759	0,541933823	0,268189367	RHEB	GTP-binding protein rheb [OS=Homo sapiens]	Q15382
6,798713	6,271456	6,077675	6,245024	6,234252	6,876911	6,807999	6,987503	6,859119	6,907492	FALSK		10			11	94	10	1	289	1	11	0,01449001	0,025060049	0,562380791	0,263267314	PPA1	Inorganic pyrophosphatase [OS=Homo sapiens]	Q15181
5,974653	6,162934	6,402679	6,469085	6,620807	7,022812	6,825858	6,983874	6,841399	6,744385	FALSK		6			2	3	2	1	318	0	2	0,022389122	0,035888864	0,557634068	0,258869697	UBE2J1	ubiquitin-conjugating enzyme e2 j1 [OS=Homo sapiens]	Q9Y385
6,184946	6,399621	5,970935	6,52505	6,487163	6,78549	6,987762	6,968966	6,77893	6,83817	FALSK		17			2	4	2	1	192	0	2	0,012296431	0,021895618	0,558320904	0,262272826	C17orf49	Isoform 3 of Chromatin complexes subunit BAP18 [OS=Homo sapiens]	Q8IXM2-3
6,505365	6,466779	6,108228	6,325459	6,312842	6,914678	6,924129	6,941885	6,82711	6,82464	FALSK		17	+	CRVO_Control	8	32	7	1	243	0	8	0,001930639	0,005311359	0,542754078	0,261573582	VAPB	vesicle-associated membrane protein-associated protein B [OS=Sus scrofa]	A5GFS8
6,456497	6,286303	6,36055	6,299184	6,34513	6,886304	6,874671	6,933099	6,923607	6,814415	FALSK		6	+	CRVO_Control	27	197	27	1	558	0	27	0,00013344	0,000978471	0,536886406	0,263546215	GPI	glucose-6-phosphate isomerase [OS=Sus scrofa]	P08059
6,555577	6,119576	6,426055	6,311767	6,267504	6,849094	6,86773	6,869118	6,96294	6,875614	FALSK		19	+	CRVO_Control	4	8	2	1	794	0	4	0,002436871	0,006271675	0,548803806	0,263765503	BRSK1	Isoform 2 of Serine/threonine-protein kinase BRSK1 [OS=Homo sapiens]	Q8TDC3-2
6,706421	6,177271	6,253005	6,227417	6,266911	7,090914	6,562555	6,921902	6,861356	6,937951	FALSK		10	+	CRVO_Control	2	5	2	1	518	0	2	0,001225353	0,003752272	0,548730755	0,265444862	ATE1	Isoform ATE1-2 of Arginyl-tRNA--protein transferase 1 [OS=Homo sapiens]	O95260-2
6,414411	6,467605	6,241155	6,356881	6,265832	6,796976	6,862827	6,91048	6,892378	6,965032	FALSK		5	+	CRVO_Control	15	48	14	1	756	1	15	0,001264816	0,003842081	0,536362076	0,259582902	TARS	Isoform 2 of Threonine--tRNA ligase, cytoplasmic [OS=Homo sapiens]	P26639-2
6,567707	6,562993	6,067162	6,314325	6,149632	6,788317	6,819139	6,855888	7,02795	6,915185	FALSK		1			4	6	4	1	430	0	4	0,012588572	0,022321458	0,548931885	0,258018662	PBX1	pre-B-cell leukemia transcription factor 1 [OS=Homo sapiens]	P40424-1
6,072858	6,24826	6,406169	6,085976	6,778909	6,7932	6,851082	6,944759	6,664497	7,109257	FALSK		12	+	CRVO_Control	3	4	3	1	1059	0	3	0,000956031	0,003127103	0,554124737	0,268522669	ACAD10	Acyl-CoA dehydrogenase family member 10 [OS=Homo sapiens]	Q6JQN1
6,360188	6,390229	6,233018	6,439201	6,329786	6,854107	6,95243	6,811824	6,930628	6,874817	FALSK		6	+	CRVO_Control	3	9	3	1	361	0	3	7,35E-06	0,000497724	0,534276772	0,264780662	TMEM30A	Cell cycle control protein 50A [OS=Homo sapiens]	Q9NV96
6,572861	6,409327	6,121014	6,326282	6,297339	6,91169	6,944263	6,886916	6,898999	6,780611	FALSK		20	+	CRVO_Control	3	9	3	1	416	0	3	0,001465146	0,004322465	0,539131165	0,260548744	APMAP	Adipocyte plasma membrane-associated protein [OS=Homo sapiens]	Q9HDC9
6,525046	6,4561	6,130269	6,290911	6,328721	6,887921	6,864173	6,895344	6,819975	6,954772	FALSK		5	+	CRVO_Control	2	3	2	1	1761	0	2	0,001815166	0,005093483	0,538227558	0,259621348	KDM3B	Lysine-specific demethylase 3B [OS=Homo sapiens]	Q7LBC6-1
6,824163	6,479132	5,997134	6,083094	6,169794	6,915505	6,897325	6,914653	6,855278	6,817173	FALSK		1			6	8	6	1	2067	0	6	0,017107635	0,028608312	0,569323254	0,265433887	AGRN	Agrin [OS=Homo sapiens]	O00468
6,620586	6,496654	6,042207	6,345183	6,1918	6,778734	6,970394	6,846744	6,976134	6,842979	FALSK		16			3	3	3	1	808	0	3	0,007729807	0,015019836	0,543710995	0,257717803	TBC1D10B	TBC1 domain family member 10B [OS=Homo sapiens]	Q4KMP7
6,442705	6,603017	6,017863	6,319933	6,229367	6,80665	6,878416	6,740357	7,043436	6,912275	FALSK		17			2	7	2	1	261	0	2	0,004627203	0,010151463	0,553649807	0,264042745	PNPO	Pyridoxine-5'-phosphate oxidase [OS=Homo sapiens]	Q9NVS9
6,502217	6,301786	6,205549	6,465478	6,275555	6,862778	6,849873	6,929379	6,929397	6,842155	FALSK		14	+	CRVO_Control	5	12	4	1	378	1	5	0,000896404	0,002991433	0,532599354	0,258528773	DPF3	Zinc finger protein DPF3 [OS=Homo sapiens]	Q92784-1
6,669918	6,500176	5,981737	6,274736	6,257327	6,864374	6,910397	6,902056	6,878957	6,85858	FALSK		10;CHR_HG2334_PATCH			8	20	8	1	361	0	8	0,010447475	0,019142764	0,54609375	0,257576803	ATAD1	ATPase family aaa domain-containing protein 1 [OS=Homo sapiens]	Q8NBU5
6,463494	6,422976	6,215879	6,195256	6,407948	6,856736	6,947475	6,761014	6,803037	7,003803	FALSK		6	+	CRVO_Control	3	5	3	1	275	0	3	0,000153815	0,001032061	0,533302212	0,261644329	ATG5	Autophagy protein 5 [OS=Homo sapiens]	Q9H1Y0-1
6,225207	6,343025	6,350801	6,32305	6,506635	7,132474	6,736188	6,754709	6,969722	6,778594	FALSK		7			3	18	3	1	248	0	3	0,009824022	0,018310162	0,524593544	0,248227365	EIF4H	Eukaryotic translation initiation factor 4H [OS=Homo sapiens]	Q15056-1
6,399297	6,49671	6,112911	6,219837	6,319037	6,979226	6,810049	6,859544	6,798421	6,873367	FALSK		6	+	CRVO_Control	2	8	2	1	107	0	2	0,001328979	0,003992202	0,554563046	0,267983792	SH3BGRL2	SH3 domain-binding glutamic acid-rich-like protein 2 [OS=Homo sapiens]	Q9UJC5
6,420507	6,488121	6,251317	6,28526	6,323733	6,841708	6,914354	6,859735	6,891134	6,903036	FALSK	Acetyl [N-Term]	13	+	CRVO_Control	5	30	5	1	188	0	5	0,000251546	0,001300971	0,528205585	0,258548086	ARL6IP5	PRA1 family protein 3 [OS=Sus scrofa]	Q56P28
6,312879	6,530525	6,146031	6,388014	6,380775	6,652384	7,00545	6,804416	6,892823	7,024961	FALSK		5	+	CRVO_Control	19	53	19	1	1086	0	19	0,000878249	0,002959503	0,524361801	0,254684031	NNT	NAD(P) transhydrogenase, mitochondrial [OS=Homo sapiens]	Q13423
6,40146	6,401851	6,244116	6,362598	6,311244	6,895092	6,821683	6,860985	6,941971	6,878457	FALSK		22	+	CRVO_Control	17	27	17	1	2102	0	17	0,000108112	0,000885209	0,535383987	0,263071056	PI4KA	phosphatidylinositol 4-kinase alpha [OS=Homo sapiens]	P42356
6,438665	6,468369	6,269922	6,198874	6,383407	6,871391	6,915222	6,905065	6,86347	6,853984	FALSK		19	+	CRVO_Control	3	16	3	1	508	0	3	0,000432455	0,001862999	0,529978943	0,258584765	FARSA	Phenylalanine--tRNA ligase alpha subunit [OS=Homo sapiens]	Q9Y285
6,373966	6,363415	6,26454	6,393805	6,383265	6,821689	6,862178	6,844731	6,882992	6,98864	FALSK		15	+	CRVO_Control	6	39	6	1	362	0	6	5,92E-05	0,000671767	0,524248028	0,258309444	PTPLAD1;HACD3	Very-long-chain (3R)-3-hydroxyacyl-CoA dehydratase 3 [OS=Homo sapiens]	Q9P035
6,605431	6,283795	6,178187	6,217398	6,413598	7,121036	6,818174	7,099125	6,698155	6,571345	FALSK		14			2	3	2	1	184	0	2	0,012581384	0,022319151	0,521885204	0,246034492	GNPNAT1	glucosamine 6-phosphate N-acetyltransferase [OS=Homo sapiens]	Q96EK6
6,400815	6,423388	6,215657	6,34577	6,394501	6,889958	6,90335	6,881772	6,895783	6,835392	FALSK		12	+	CRVO_Control	7	51	5	1	201	0	7	0,000181689	0,001114534	0,525225163	0,2575487	RAB35	Ras-related protein Rab-35 [OS=Homo sapiens]	Q15286
6,725196	6,590961	6,013462	6,329123	5,979568	6,78136	7,045487	6,78398	6,867897	6,912889	FALSK		19			3	7	2	1	2564	0	3	0,021269677	0,034385222	0,550660419	0,256147412	SPTBN4	Spectrin beta chain, non-erythrocytic 4 [OS=Homo sapiens]	Q9H254
6,073396	6,052974	6,489518	6,33161	6,704292	7,237748	6,751505	6,908657	6,76387	6,651801	FALSK		3			5	8	5	1	261	0	5	0,055496747	0,078153109	0,532358265	0,242092493	EMC3	ER membrane protein complex subunit 3 [OS=Homo sapiens]	Q9P0I2
6,458488	6,568491	6,137582	6,292583	6,298273	6,91767	6,88047	6,92837	6,847299	6,830929	FALSK		X	+	CRVO_Control	6	11	6	1	755	0	6	0,002433526	0,006267322	0,529864025	0,255007324	HTATSF1	HIV Tat-specific factor 1 [OS=Homo sapiens]	O43719
6,444566	6,380435	6,176844	6,482181	6,289863	6,748651	7,045472	7,004438	6,806393	6,771774	FALSK		17			17	62	10	1	672	7	17	0,006610045	0,01323056	0,520567799	0,247829052	PRKCA	Protein kinase C alpha type [OS=Homo sapiens]	P17252
6,606499	6,45561	6,104117	6,291706	6,288174	6,820948	6,821229	6,826549	6,9248	7,002	FALSK	Acetyl [N-Term]	2			13	113	12	1	378	0	13	0,006536781	0,013125496	0,529883957	0,252086679	HNRNPA3	Heterogeneous nuclear ribonucleoprotein A3 [OS=Homo sapiens]	P51991-1
6,170303	6,365352	6,282773	6,41414	6,469852	6,724104	7,061595	6,619881	6,861931	7,040696	FALSK		11	+	CRVO_Control	6	11	6	1	703	0	6	0,001004586	0,003249475	0,521157455	0,252915444	RNF214	Ring finger protein 214 [OS=Homo sapiens]	Q8ND24
6,349443	6,477176	6,201501	6,403888	6,351545	6,867272	6,84344	6,892187	6,900029	6,89832	FALSK		19	+	CRVO_Control	5	29	5	1	378	0	5	0,000545802	0,002171179	0,523538971	0,255140936	CDC37	Hsp90 co-chaperone Cdc37 [OS=Homo sapiens]	Q16543
6,378511	6,495056	6,427941	6,095924	6,37504	7,067165	6,818902	6,834155	6,716991	6,940167	FALSK		16	+	CRVO_Control	2	2	2	1	386	0	2	0,001548297	0,004508135	0,520981503	0,2519417	NECAB2	N-terminal EF-hand calcium-binding protein 2 [OS=Homo sapiens]	Q7Z6G3
6,576402	6,425371	6,094851	6,361826	6,30186	6,846117	6,899436	6,852022	6,916279	6,885082	FALSK		9	+	CRVO_Control	10	24	10	1	337	0	10	0,0026526	0,006664021	0,527725315	0,253794935	DCPS	M7GpppX diphosphatase [OS=Sus scrofa]	Q8MIZ3
6,391366	6,560634	6,117588	6,327844	6,373811	6,905675	6,87221	6,877681	6,944239	6,796311	FALSK		1	+	CRVO_Control	10	33	6	1	359	4	10	0,002465768	0,006307507	0,524974728	0,252708483	GNAQ	Guanine nucleotide-binding protein G(Q) subunit alpha [OS=Sus scrofa]	Q2PKF4
6,543281	6,607781	6,10177	6,180966	6,285876	6,847358	7,083991	6,826854	6,804771	6,799876	FALSK		3	+	CRVO_Control	2	5	2	1	594	0	2	0,00174514	0,004948261	0,52863493	0,25524642	CHDH	Choline dehydrogenase, mitochondrial [OS=Homo sapiens]	Q8NE62
6,444567	6,380228	6,17936	6,389695	6,400864	6,870301	6,846744	6,849825	6,894799	6,934157	FALSK		9	+	CRVO_Control	6	61	6	1	290	0	6	0,000237535	0,001268305	0,520222569	0,254798219	SET	Protein SET [OS=Homo sapiens]	Q01105
6,231826	6,623904	6,222022	6,357788	6,33428	6,855491	6,91527	6,885792	6,90261	6,834046	FALSK		4	+	CRVO_Control	10	29	6	1	440	0	10	0,0012826	0,003886761	0,524677849	0,254076266	CTBP1	C-terminal-binding protein 1 [OS=Homo sapiens]	Q13363-1
6,497873	6,374935	6,178391	6,361796	6,377834	6,904482	7,01419	6,931253	6,752856	6,775023	FALSK		9	+	CRVO_Control	6	12	3	1	726	0	6	0,002333662	0,006063682	0,517395115	0,24932791	BRD3	bromodomain-containing protein 3 [OS=Homo sapiens]	Q15059
6,240252	6,460776	6,402232	6,348988	6,335052	6,74784	6,953727	6,948611	6,821736	6,903564	FALSK		10	+	CRVO_Control	9	26	9	1	795	0	9	7,82E-06	0,000477922	0,517635632	0,256570114	ALDH18A1	delta-1-pyrroline-5-carboxylate synthase [OS=Homo sapiens]	P54886
6,5352	6,368751	6,275691	6,335244	6,285921	6,874663	6,815692	6,909773	6,895883	6,893532	FALSK	Acetyl [N-Term]	11	+	CRVO_Control	23	107	23	1	543	0	23	0,000704116	0,002569109	0,517747211	0,251959196	STIP1	stress-induced-phosphoprotein 1 [OS=Homo sapiens]	P31948
6,51138	6,36111	6,214091	6,293906	6,385931	6,891961	6,889809	6,915146	6,827786	6,843216	FALSK		8	+	CRVO_Control	2	3	2	1	232	0	2	0,000608622	0,002337675	0,520300007	0,253420083	ANKRD46	Ankyrin repeat domain-containing protein 46 [OS=Homo sapiens]	Q86W74
6,42286	6,392931	6,252707	6,416366	6,323235	6,884417	6,8359	6,909459	6,842486	6,915691	FALSK		20	+	CRVO_Control	3	10	3	1	306	0	3	0,000355013	0,001625429	0,515970993	0,252204526	RALY	RNA-binding protein Raly [OS=Homo sapiens]	Q9UKM9-1
6,587647	6,501444	6,168735	6,264868	6,213264	6,812626	6,830613	6,942512	6,849302	6,939281	FALSK		7			3	10	3	1	450	0	3	0,00817993	0,015797307	0,527675438	0,250296321	LANCL2	lanC-like protein 2 [OS=Homo sapiens]	Q9NS86
6,502602	6,449447	6,255292	6,327499	6,263922	6,847857	6,84734	6,913478	6,897167	6,883863	FALSK		19	+	CRVO_Control	9	26	9	1	499	0	9	0,001123291	0,003525162	0,518188763	0,251299048	PPP5C	Serine/threonine-protein phosphatase 5 [OS=Homo sapiens]	P53041
6,571696	6,435462	6,152749	6,320051	6,304679	6,883832	6,884429	6,866608	6,85603	6,90005	FALSK		4	+	CRVO_Control	12	63	10	1	336	2	12	0,001533989	0,004473348	0,52126236	0,252093322	HNRNPD	Isoform 2 of Heterogeneous nuclear ribonucleoprotein D0 [OS=Homo sapiens]	Q14103-2
6,20512	6,672816	6,278169	6,34773	6,203269	6,999121	6,854887	6,890646	6,883186	6,680295	FALSK		10			2	2	2	1	424	0	2	0,006501742	0,013075917	0,520206261	0,247719905	SPOCK2	Testican-2 [OS=Homo sapiens]	Q92563
6,40313	6,271864	6,234292	6,492745	6,40026	6,829331	6,903267	6,875416	6,862909	6,914532	FALSK		8	+	CRVO_Control	8	10	8	1	821	0	8	0,000666537	0,002487048	0,516633034	0,251526068	EFR3A	protein EFR3 homolog A [OS=Homo sapiens]	Q14156-1
6,405956	6,415843	6,183796	6,361826	6,438818	6,896025	6,806365	6,90974	6,892383	6,880521	FALSK		7	+	CRVO_Control	24	56	24	1	998	0	24	0,000857329	0,002920156	0,515758991	0,250667331	GTF2I	General transcription factor II-I [OS=Homo sapiens]	P78347
6,498251	6,488644	6,024586	6,35931	6,40429	6,757556	6,885086	6,878971	6,904484	6,953032	FALSK		12			2	3	2	1	628	0	2	0,006278778	0,012762922	0,520809841	0,248108582	FBXO21	F-box only protein 21 [OS=Homo sapiens]	O94952-2
6,619771	6,535096	6,085684	6,297309	6,215279	6,870807	6,989239	6,826913	6,969945	6,695955	FALSK	Acetyl [N-Term]	13	+	CRVO_Control	5	10	5	1	490	0	5	0,003895581	0,008923353	0,519944286	0,249166212	KATNAL1	katanin p60 ATPase-containing subunit A-like 1 [OS=Homo sapiens]	Q9BW62
6,557626	6,445159	6,117738	6,365712	6,302853	6,924687	6,836681	6,846003	6,901649	6,873971	FALSK		1	+	CRVO_Control	10	16	10	1	1353	0	10	0,001385179	0,004144604	0,518780804	0,251149659	UBE4B	Isoform 4 of Ubiquitin conjugation factor E4 B [OS=Homo sapiens]	O95155-4
6,424263	6,395723	6,280047	6,329505	6,394647	6,915938	6,8543	6,879967	6,858377	6,87023	FALSK		2	+	CRVO_Control	22	110	21	1	539	1	22	3,44E-05	0,000574538	0,510925579	0,252296231	CCT4	T-complex protein 1 subunit delta [OS=Homo sapiens]	P50991
6,604367	6,309244	6,231468	6,289067	6,370666	6,868403	6,931314	6,852998	6,888131	6,836673	FALSK		1	+	CRVO_Control	12	58	12	1	553	0	12	0,001729312	0,004918097	0,514541054	0,248688891	HP1BP3	Heterochromatin protein 1-binding protein 3 [OS=Homo sapiens]	Q5SSJ5-1
6,425749	6,501408	6,293694	6,250607	6,34783	6,899167	6,844695	6,848584	6,919059	6,862694	FALSK		14	+	CRVO_Control	5	9	5	1	2083	0	5	0,000649356	0,002447026	0,510982132	0,248890073	RALGAPA1	Isoform 2 of Ral GTPase-activating protein subunit alpha-1 [OS=Homo sapiens]	Q6GYQ0-2
6,51157	6,624722	6,025372	6,277865	6,32064	6,91346	6,840789	6,804257	6,932646	6,88189	FALSK		8			7	33	2	1	193	0	7	0,006017033	0,012323378	0,522574711	0,24904901	NCALD	Neurocalcin-delta [OS=Homo sapiens]	P61601
6,285616	6,352411	6,365207	6,420503	6,3996	6,793659	6,887748	6,945922	6,854402	6,887013	FALSK	Acetyl [N-Term]	10	+	CRVO_Control	11	54	11	1	206	0	11	3,14E-05	0,000561056	0,509081459	0,251468101	RAB18	Ras-related protein Rab-18 [OS=Homo sapiens]	Q9NP72
6,602884	6,387156	6,238405	6,381976	6,193772	6,748193	6,827819	7,143638	6,886306	6,73064	FALSK		9			2	2	2	1	418	0	2	0,014004504	0,024398473	0,506480789	0,238749532	HSDL2	Hydroxysteroid dehydrogenase-like protein 2 [OS=Homo sapiens]	Q6YN16
6,600948	6,338583	5,911564	6,495623	6,383058	6,797862	6,804792	7,01055	6,91524	6,817523	FALSK		5			2	5	2	1	199	0	2	0,026037332	0,040771385	0,523238564	0,243182216	ZMAT2	Zinc finger matrin-type protein 2 [OS=Homo sapiens]	Q96NC0
6,473866	6,309807	6,370668	6,335151	6,308875	6,849229	6,841851	6,897632	6,871185	6,909827	FALSK		12	+	CRVO_Control	8	19	8	1	434	0	8	0,000159629	0,001036222	0,514271259	0,252433332	CMAS	N-acylneuraminate cytidylyltransferase [OS=Homo sapiens]	Q8NFW8
6,562243	6,465974	6,157852	6,312883	6,309249	6,812498	6,849249	6,806066	6,885086	7,011227	FALSK		7	+	CRVO_Control	2	2	2	1	202	0	2	0,003793518	0,008753029	0,511185074	0,245212646	BCL7B	B-cell CLL/lymphoma 7 protein family member B [OS=Homo sapiens]	Q9BQE9-1
6,518507	6,243985	6,380537	6,360092	6,326328	6,923575	6,855207	6,901364	6,848986	6,841432	FALSK		1	+	CRVO_Control	9	37	9	1	227	0	9	0,000104189	0,000866189	0,508222961	0,249982094	PCMT1	protein-L-isoaspartate(D-aspartate) O-methyltransferase [OS=Sus scrofa]	P80895
6,530424	6,391366	6,16274	6,339849	6,401732	6,889886	6,823984	6,868466	6,888119	6,896606	FALSK		19	+	CRVO_Control	29	189	24	1	898	5	29	0,000971756	0,00315675	0,508190155	0,246864258	ILF3	Isoform 7 of Interleukin enhancer-binding factor 3 [OS=Homo sapiens]	Q12906-7
6,465075	6,618928	6,226024	6,061736	6,414375	7,01065	6,902069	6,545994	7,074677	6,775379	FALSK		8			7	25	7	1	341	0	7	0,02011035	0,032720316	0,504526043	0,236325479	RDH10	Retinol dehydrogenase 10 [OS=Homo sapiens]	Q8IZV5
6,409366	6,427777	6,219685	6,36712	6,412613	6,938303	6,83257	6,931293	6,859842	6,800412	FALSK		11	+	CRVO_Control	12	31	12	1	669	0	12	0,000954423	0,003127241	0,505171967	0,245472132	RBM14	RNA-binding protein 14 [OS=Homo sapiens]	Q96PK6-1
6,347142	6,667807	6,157178	6,217627	6,386262	6,852709	6,835704	6,852045	6,834146	6,976359	FALSK		15			3	4	3	1	4861	0	3	0,004977478	0,010672862	0,514989471	0,246184088	HERC1	Probable E3 ubiquitin-protein ligase HERC1 [OS=Homo sapiens]	Q15751
6,520787	6,148361	6,228833	6,423294	6,427552	6,933275	6,594016	6,915216	6,922096	6,937058	FALSK		7	+	CRVO_Control	3	4	3	1	145	0	3	0,000420277	0,001831344	0,510567188	0,249376746	BUD31	Isoform 2 of Protein BUD31 homolog [OS=Homo sapiens]	P41223-2
6,743633	6,336273	6,160398	6,275061	6,262545	7,036073	6,900805	6,763082	6,801303	6,84797	FALSK		13	+	CRVO_Control	11	40	11	1	407	0	11	0,000830413	0,002867119	0,514264774	0,250019009	ACY1	Aminoacylase-1 [OS=Sus scrofa]	P37111
6,466772	6,444592	6,197696	6,477149	6,243136	6,865381	6,878838	6,801543	6,894132	6,92301	FALSK		2	+	CRVO_Control	31	83	24	1	957	0	31	0,000869908	0,002944485	0,506711674	0,246365332	KIF5C	kinesin heavy chain isoform 5C [OS=Homo sapiens]	O60282-1
6,667253	6,421225	6,16489	6,177634	6,349995	6,84797	6,729936	6,985441	6,856522	6,923846	FALSK		12;CHR_HG1362_PATCH			3	4	3	1	196	0	3	0,012179025	0,02174785	0,512543678	0,242006935	LOH12CR1;BORCS5	BLOC-1-related complex subunit 5 [OS=Homo sapiens]	Q969J3-1
6,189838	6,437822	6,348153	6,407693	6,451779	6,908983	6,877744	6,860077	6,856075	6,858916	FALSK		16	+	CRVO_Control	11	22	11	1	553	0	11	0,000840725	0,002884332	0,505301857	0,245758536	GLYR1	Putative oxidoreductase GLYR1 [OS=Homo sapiens]	Q49A26-1
6,477988	6,484621	6,222551	6,342422	6,302427	6,890475	6,829301	6,914629	6,872197	6,856672	FALSK		16	+	CRVO_Control	10	37	10	1	412	0	10	0,001085521	0,003432201	0,506652737	0,245933784	DNAJA2	DnaJ homolog subfamily A member 2 [OS=Homo sapiens]	O60884
6,503114	6,442757	6,136213	6,363684	6,386219	6,862793	6,8097	6,87282	6,895344	6,920547	FALSK		14	+	CRVO_Control	33	126	29	1	1042	4	33	0,001848751	0,005160983	0,50584383	0,244479955	ATP2A2	Sarcoplasmic/endoplasmic reticulum calcium ATPase 2 [OS=Sus scrofa]	P11607-1
6,253687	6,428773	6,334177	6,383695	6,45038	6,718351	6,861681	6,940882	6,889258	6,940744	FALSK		2	+	CRVO_Control	17	33	17	1	727	0	17	6,99E-05	0,000708102	0,500041199	0,246401368	GPD2	Glycerol-3-phosphate dehydrogenase, mitochondrial [OS=Homo sapiens]	P43304
6,589069	6,440001	6,30727	6,221543	6,221608	6,822717	6,843852	6,756577	6,884065	7,011677	FALSK		14			3	4	2	1	651	1	3	0,006651684	0,01329285	0,507879353	0,242050791	NUMB	Protein numb homolog [OS=Homo sapiens]	P49757
6,699542	6,345566	6,105404	6,253404	6,386106	6,826529	6,913473	6,918832	6,900812	6,793816	FALSK		11			3	6	3	1	229	0	3	0,011683107	0,020970956	0,512687874	0,242234223	CWC15	spliceosome-associated protein CWC15 homolog [OS=Homo sapiens]	Q9P013
6,610707	6,437058	6,115779	6,335749	6,31741	6,835325	6,859807	6,892988	6,829711	6,938991	FALSK		17			8	33	6	1	328	0	8	0,005470131	0,011501534	0,508023834	0,242720076	MSI2	RNA-binding protein Musashi homolog 2 [OS=Homo sapiens]	Q96DH6-1
6,56008	6,464842	6,119969	6,354019	6,326225	6,880699	6,840419	6,862939	6,906626	6,867897	FALSK		18	+	CRVO_Control	8	34	7	1	249	1	8	0,002440288	0,006271953	0,50668869	0,244247438	VAPA	vesicle-associated membrane protein-associated protein A [OS=Homo sapiens]	Q9P0L0
6,317855	6,530372	6,290709	6,435984	6,22865	6,892518	6,936188	6,655332	6,743703	7,08033	FALSK		10			2	4	2	1	349	0	2	0,007014252	0,013849494	0,500900555	0,238712668	HIF1AN	Hypoxia-inducible factor 1-alpha inhibitor [OS=Homo sapiens]	Q9NWT6
6,516804	6,390145	6,150554	6,423326	6,277581	6,917661	6,857122	6,924839	6,789153	6,830332	FALSK		3	+	CRVO_Control	5	9	5	1	607	0	5	0,002159413	0,005756917	0,512139511	0,247067852	EPM2AIP1	EPM2A-interacting protein 1 [OS=Homo sapiens]	Q7L775
6,693244	6,405069	6,103225	6,327922	6,269223	6,87897	6,861087	6,840428	6,891569	6,883857	FALSK		9			27	583	2	1	445	37	27	0,00535938	0,01128745	0,511445618	0,24434361	TUBB4B	Tubulin beta-4B chain [OS=Homo sapiens]	P68371
6,425205	6,542956	5,907612	6,437452	6,421403	6,878408	6,991776	6,824615	6,784888	6,857831	FALSK	Acetyl [N-Term]	2			2	3	2	1	1672	0	2	0,006717744	0,013368488	0,520578289	0,247779904	KIDINS220	Isoform 2 of Kinase D-interacting substrate of 220 kDa [OS=Homo sapiens]	Q9ULH0-2
6,445444	6,547352	6,178584	6,320083	6,343407	7,00157	6,874866	6,785552	6,830087	6,852445	FALSK		11	+	CRVO_Control	15	46	15	1	1178	0	15	0,000441794	0,00188396	0,501930141	0,245182023	PC	pyruvate carboxylase, mitochondrial [OS=Homo sapiens]	P11498
6,486226	6,55122	6,12857	6,371943	6,294423	6,83403	6,900768	6,8496	6,920574	6,846003	FALSK		4	+	CRVO_Control	42	483	2	1	1021	22	42	0,002037734	0,005517892	0,503718281	0,243274871	ATP1A1	Sodium/potassium-transporting ATPase subunit alpha-1 [OS=Sus scrofa]	P05024
6,641356	6,397359	6,133114	6,240791	6,403418	6,886298	6,904759	6,80856	6,876492	6,87387	FALSK		10	+	CRVO_Control	8	16	8	1	778	0	8	0,002603889	0,006563393	0,506788158	0,244139774	ABLIM1	Actin-binding LIM protein 1 [OS=Homo sapiens]	O14639-1
6,609036	6,142757	6,280499	6,360243	6,275835	6,624963	6,672994	7,049641	6,889943	7,000311	FALSK		7			4	14	2	1	395	0	4	0,018441801	0,0303969	0,513896084	0,240837472	TSC22D4	TSC22 domain family protein 4 [OS=Homo sapiens]	Q9Y3Q8
6,44571	6,324076	6,273352	6,487395	6,31614	6,829204	6,929463	6,887484	6,890952	6,805404	FALSK		9	+	CRVO_Control	7	14	5	1	1105	0	7	0,000504215	0,002048745	0,49916687	0,243669773	RANBP6	ran-binding protein 6 [OS=Homo sapiens]	O60518
6,535099	6,344999	6,245688	6,412682	6,316928	6,903116	6,886631	6,788356	6,877062	6,890745	FALSK		11	+	CRVO_Control	8	17	8	1	963	0	8	0,000179867	0,00111236	0,498102856	0,244503963	PACS1	Phosphofurin acidic cluster sorting protein 1 [OS=Homo sapiens]	Q6VY07
6,453333	6,423901	6,178413	6,509376	6,276679	6,936361	6,876639	6,912865	6,8182	6,799601	FALSK			+	CRVO_Control	3	7	3	1	367	0	3	0,001894506	0,005227128	0,500393105	0,241880548		Isoform 4 of Nitrilase homolog 1 [OS=Homo sapiens]	Q86X76-3
5,868066	6,358996	6,38352	6,469	6,671397	6,991688	6,721115	6,986558	6,893415	6,726943	FALSK	Acetyl [N-Term]	2			4	8	4	1	239	0	4	0,043420289	0,063067554	0,513747978	0,236077087	PDCL3	phosducin-like protein 3 [OS=Homo sapiens]	Q9H2J4
6,604353	6,45164	6,186531	6,312718	6,282622	6,907301	6,886913	6,892206	6,902041	6,75334	FALSK		9	+	CRVO_Control	8	20	7	1	395	1	8	0,001873589	0,005199689	0,500787449	0,242088532	SH3GLB2	Endophilin-B2 [OS=Homo sapiens]	Q9NR46
6,493366	6,454321	6,186854	6,458798	6,259173	6,859845	6,882917	6,907481	6,867056	6,828337	FALSK		3	+	CRVO_Control	11	30	7	1	433	4	11	0,001562763	0,00453632	0,498624992	0,241451702	GSK3B	Isoform 2 of Glycogen synthase kinase-3 beta [OS=Homo sapiens]	P49841-2
6,637151	6,438498	6,16783	6,253461	6,337934	6,94401	6,853591	6,959417	6,877073	6,697596	FALSK		7			5	13	3	1	206	0	5	0,005307179	0,01119617	0,499362278	0,238849998	RALA	Ras-related protein Ral-A [OS=Homo sapiens]	P11233
6,537445	6,478081	6,144649	6,367891	6,322189	6,872416	6,87712	6,958838	6,844038	6,789587	FALSK		11	+	CRVO_Control	8	46	5	1	208	2	8	0,003871592	0,008884506	0,498348904	0,239246419	RAB6A	Ras-related protein Rab-6A [OS=Homo sapiens]	P20340-1
6,463506	6,449538	6,271701	6,389718	6,298235	6,886304	6,863508	6,916393	6,857275	6,820151	FALSK		5	+	CRVO_Control	21	98	20	1	541	0	21	0,000304834	0,001453618	0,494186974	0,241984451	CCT5	T-complex protein 1 subunit epsilon [OS=Homo sapiens]	P48643
6,538212	6,47959	6,143721	6,318634	6,359694	6,805453	6,950737	6,793009	6,815464	6,966186	FALSK		16	+	CRVO_Control	3	7	3	1	318	0	3	0,001704671	0,004869937	0,498199463	0,241075571	COQ9	Ubiquinone biosynthesis protein COQ9, mitochondrial [OS=Homo sapiens]	O75208-1
6,61702	6,639297	6,124112	5,961281	6,413389	6,788972	6,869666	6,83908	6,832704	6,999845	FALSK		16			6	14	6	1	303	0	6	0,019396015	0,031735128	0,51503334	0,241101664	STUB1	E3 ubiquitin-protein ligase CHIP [OS=Homo sapiens]	Q9UNE7-1
6,669925	6,381052	6,231112	6,258138	6,289616	6,905107	6,948889	6,835244	6,848182	6,800593	FALSK		12	+	CRVO_Control	9	35	9	1	454	0	9	0,001848092	0,005162946	0,501634598	0,242513702	TMPO	Lamina-associated polypeptide 2, isoforms beta/gamma [OS=Homo sapiens]	P42167
6,638062	6,535969	6,135804	6,260206	6,25072	6,886887	6,827152	6,867793	6,911691	6,849247	FALSK		1			5	9	5	1	337	0	5	0,006820838	0,013502766	0,504401684	0,240391324	ERI3	ERI1 exoribonuclease 3 [OS=Homo sapiens]	O43414-1
6,08828	6,442866	6,395309	6,422976	6,49663	6,950679	6,781597	6,848347	6,73768	7,002841	FALSK		X			8	15	5	1	559	3	8	0,007339785	0,014417164	0,495016289	0,23589766	GK	glycerol kinase [OS=Homo sapiens]	P32189-3
5,368395	6,507394	6,566924	6,569822	6,537882	6,835143	6,780047	6,822092	6,825191	7,049187	FALSK		9			2	3	2	1	293	0	2	0,077425507	0,104122064	0,552248573	0,247232054	ABHD17B;FAM108B1	Isoform 2 of Protein ABHD17B [OS=Homo sapiens]	Q5VST6-2
6,355787	6,358335	6,293425	6,416374	6,454971	6,879445	6,849825	6,840221	6,889114	6,879788	FALSK		15	+	CRVO_Control	16	53	16	1	600	0	16	2,00E-05	0,000505483	0,491900253	0,243384531	MYEF2	Myelin expression factor 2 [OS=Homo sapiens]	Q9P2K5-1
6,493455	6,385431	6,161888	6,36807	6,459432	7,086401	6,837943	6,910493	6,646739	6,82273	FALSK		21	+	CRVO_Control	2	2	2	1	174	0	2	0,004306024	0,009585518	0,487206173	0,23383656	WRB	Tail-anchored protein insertion receptor WRB [OS=Homo sapiens]	O00258-1
6,635572	6,267604	6,265964	6,335524	6,343797	6,826949	6,737486	6,910181	6,935829	6,91431	FALSK		5	+	CRVO_Control	3	5	3	1	646	0	3	0,003655959	0,008513353	0,495258904	0,237967748	PPWD1	Peptidylprolyl isomerase domain and WD repeat-containing protein 1 [OS=Homo sapiens]	Q96BP3
6,357122	6,51078	6,186782	6,391272	6,426816	6,894814	6,87555	6,840419	6,869755	6,852779	FALSK		6	+	CRVO_Control	14	44	14	1	802	0	14	0,000573528	0,002232286	0,492109203	0,240115388	CDC5L	Cell division cycle 5-like protein [OS=Homo sapiens]	Q99459
6,720217	6,487991	6,016495	6,379454	6,184946	6,98789	6,892018	6,911667	6,747115	6,783051	FALSK		11			4	5	4	1	497	0	4	0,010302259	0,018986808	0,506527519	0,239950488	PPP2R5B	Serine/threonine-protein phosphatase 2A 56 kDa regulatory subunit beta isoform [OS=Homo sapiens]	Q15173
6,491296	6,403384	6,297192	6,358586	6,333301	6,966416	6,878216	6,709265	6,759976	6,99134	FALSK		15	+	CRVO_Control	3	4	3	1	183	0	3	0,000463088	0,001924964	0,484290791	0,236693101	EMC4	ER membrane protein complex subunit 4 [OS=Homo sapiens]	Q5J8M3-1
6,700195	6,46643	5,851936	6,323945	6,326823	6,883678	6,869454	6,671454	6,901066	6,955778	FALSK		1			3	3	3	1	583	0	3	0,008319855	0,016026712	0,522420216	0,247869346	RALGPS2	Ras-specific guanine nucleotide-releasing factor RalGPS2 [OS=Homo sapiens]	Q86X27-1
6,266776	6,274894	6,463628	6,30659	6,554811	7,061543	6,702467	6,831018	6,880751	6,828762	FALSK		7			6	15	6	1	489	0	6	0,005849765	0,01207868	0,487568665	0,233177192	PMPCB	mitochondrial-processing peptidase subunit beta [OS=Homo sapiens]	O75439
6,733171	6,388015	5,927863	6,270105	6,457188	6,891243	6,949491	6,826397	6,707562	6,918652	FALSK		19			4	11	2	1	953	0	4	0,013498703	0,023571434	0,503400803	0,237526652	SAFB2	scaffold attachment factor B2 [OS=Homo sapiens]	Q14151
6,001116	6,449557	6,627233	6,293256	6,454505	6,828283	6,809234	7,026157	6,775114	6,878968	FALSK		21	+	CRVO_Control	11	47	7	1	780	2	11	0,004141476	0,009317706	0,498417854	0,239101154	PFKL	ATP-dependent 6-phosphofructokinase, liver type [OS=Homo sapiens]	P17858-1
6,22299	6,590091	6,162793	6,440413	6,444586	6,856113	6,857261	6,833491	6,896634	6,8878	FALSK		7	+	CRVO_Control	4	10	4	1	689	0	4	0,002462559	0,006303554	0,494085312	0,238364587	MEPCE	7SK snRNA methylphosphate capping enzyme [OS=Homo sapiens]	Q7L2J0-1
6,532887	6,481683	6,14498	6,383058	6,325352	6,900248	6,826949	6,846526	6,905735	6,845293	FALSK		X	+	CRVO_Control	8	29	4	1	624	0	8	0,001575535	0,004562913	0,491358471	0,238026452	UBQLN2	Ubiquilin-2 [OS=Homo sapiens]	Q9UHD9
6,286388	6,784334	6,311047	6,097534	6,328914	6,9847	6,781044	6,964051	6,851118	6,730617	FALSK					4	20	4	1	354	0	4	0,023058264	0,03674396	0,500662804	0,233993602		Isoform 1 of Serum paraoxonase/arylesterase 2 [OS=Homo sapiens]	Q15165-1
6,27842	6,131561	6,557226	6,164203	6,646224	7,123257	6,143006	6,846866	6,737423	7,197225	FALSK		19			3	4	2	1	297	0	3	0,032480579	0,049057321	0,454028416	0,212035212	CNN1	Calponin-1 [OS=Homo sapiens]	P51911
6,63957	6,505378	6,321674	6,254331	6,129136	7,304236	6,572122	6,682986	6,965207	6,673833	FALSK		4			13	69	13	1	260	0	13	0,016149458	0,02738041	0,469659233	0,221803416	CA3	carbonic anhydrase 3 [OS=Sus scrofa]	Q5S1S4
6,016711	6,488128	6,534693	6,310513	6,498163	6,846404	6,936938	6,887995	6,7601	6,886303	FALSK		6			7	50	7	1	492	0	7	0,004543307	0,010025423	0,493906403	0,236779064	SLC2A1	Solute carrier family 2, facilitated glucose transporter member 1 [OS=Sus scrofa]	P20303
6,728177	6,433465	6,253332	6,046159	6,348484	6,543022	6,782667	6,883722	7,152004	6,885028	FALSK		7			2	4	2	1	2190	0	2	0,080454235	0,107927107	0,48736515	0,220589509	INTS1	integrator complex subunit 1 [OS=Homo sapiens]	Q8N201
6,287724	6,383681	6,400864	6,369415	6,457779	6,759668	6,893771	6,856084	6,759773	7,029547	FALSK		9	+	CRVO_Control	4	6	3	1	247	1	4	8,97E-05	0,000798355	0,479875851	0,236388043	NIPSNAP3A	protein NipSnap homolog 3A [OS=Homo sapiens]	Q9UFN0
6,596713	6,291325	6,36746	6,324393	6,304719	6,937378	6,784922	6,939292	6,803337	6,84579	FALSK		15	+	CRVO_Control	4	10	4	1	410	0	4	0,00025896	0,001310706	0,485221672	0,23788106	NR2E3	Photoreceptor-specific nuclear receptor [OS=Homo sapiens]	Q9Y5X4
6,343692	6,476443	6,296228	6,394879	6,399982	6,886906	6,810565	6,919696	6,820151	6,879526	FALSK		2	+	CRVO_Control	23	104	23	1	740	0	23	0,000623478	0,002377871	0,481123829	0,23476086	DDX1	ATP-dependent RNA helicase DDX1 [OS=Homo sapiens]	Q92499
6,521208	6,391151	6,297871	6,388677	6,306308	6,760216	6,985218	6,756834	6,839692	6,959946	FALSK		14;CHR_HSCHR14_7_CTG1	+	CRVO_Control	3	4	3	1	425	0	3	0,002589111	0,006530485	0,479338169	0,231385957	UBR7	Putative E3 ubiquitin-protein ligase UBR7 [OS=Homo sapiens]	Q8N806
6,564765	6,468878	6,151854	6,325443	6,260222	6,882341	6,786377	6,828433	6,848722	6,914105	FALSK		7	+	CRVO_Control	3	4	3	1	512	0	3	0,003107083	0,007473955	0,497763157	0,239529106	ICA1	Isoform 2 of Islet cell autoantigen 1 [OS=Homo sapiens]	Q05084-2
6,227386	6,255214	6,305377	6,527452	6,542748	6,759969	6,834202	7,066968	6,796731	6,830329	FALSK		6			5	7	5	1	2177	0	5	0,00641007	0,012932717	0,486004543	0,232201015	KIAA1244;ARFGEF3	Brefeldin A-inhibited guanine nucleotide-exchange protein 3 [OS=Homo sapiens]	Q5TH69
6,31185	6,466784	6,346037	6,457968	6,33181	6,712865	6,805453	6,983223	6,90737	6,888447	FALSK		1	+	CRVO_Control	4	30	2	1	218	0	4	0,000890373	0,002984442	0,476581764	0,232060191	RAB4A	Ras-related protein Rab-4A [OS=Homo sapiens]	P20338
6,575056	6,429391	6,13468	6,36416	6,378474	6,80383	6,880808	6,924069	6,852842	6,845872	FALSK		11			4	5	4	1	638	0	4	0,005586936	0,011669463	0,485131931	0,232190054	ZNF143	zinc finger protein 143 [OS=Homo sapiens]	P52747
6,442095	6,40986	6,26298	6,40784	6,398273	6,914656	6,812498	6,872033	6,877611	6,832248	FALSK		3	+	CRVO_Control	32	69	32	1	1626	0	32	0,000172274	0,001090304	0,477599335	0,234660628	TOP2B	DNA topoisomerase 2-beta [OS=Homo sapiens]	Q02880
6,589464	6,439623	6,068241	6,526695	6,249825	6,8505	6,878971	6,803485	7,002253	6,76288	FALSK		X	+	CRVO_Control	6	12	2	1	628	0	6	0,00310842	0,00747243	0,484848309	0,233541045	GSPT2	eukaryotic peptide chain release factor GTP-binding subunit ERF3B [OS=Homo sapiens]	Q8IYD1
6,341066	6,481268	6,435275	6,427917	6,197904	6,830839	6,970637	6,897718	6,789477	6,804871	FALSK		17	+	CRVO_Control	3	4	3	1	224	0	3	0,000249451	0,001300781	0,482022572	0,236386635	CCDC43	Coiled-coil domain-containing protein 43 [OS=Homo sapiens]	Q96MW1
6,580369	6,295181	6,358103	6,269466	6,404281	6,901403	6,809537	6,805735	6,876442	6,911608	FALSK		2	+	CRVO_Control	4	6	4	1	423	0	4	0,000524487	0,002108515	0,479464722	0,234216683	WDR12	ribosome biogenesis protein WDR12 [OS=Homo sapiens]	Q9GZL7
6,628185	6,395712	6,236967	6,325395	6,315588	6,856659	6,852971	6,850497	6,825909	6,920055	FALSK		5	+	CRVO_Control	31	146	29	1	840	2	31	0,002330997	0,006060912	0,480848885	0,232313336	HSPA4	Heat shock 70 kDa protein 4 [OS=Homo sapiens]	P34932
6,624247	6,444581	6,14847	6,349607	6,325341	6,850187	6,958805	6,808435	6,844823	6,840428	FALSK		10	+	CRVO_Control	10	21	10	1	574	0	10	0,002399062	0,006199621	0,482086945	0,232830386	OPTN	Optineurin [OS=Sus scrofa]	Q7YS99
6,365303	6,566969	6,169073	6,421427	6,385974	6,744177	6,903728	6,796992	6,878868	6,965693	FALSK		18	+	CRVO_Control	6	32	5	1	244	0	6	0,001058447	0,003377585	0,476142502	0,23157261	RAB12	Ras-related protein Rab-12 [OS=Homo sapiens]	Q6IQ22
6,572071	6,563748	6,172737	6,195562	6,376579	6,900865	6,777155	6,892491	6,858104	6,868687	FALSK		7			2	3	2	1	664	0	2	0,007345724	0,014413892	0,483320808	0,230577373	ZNF800	zinc finger protein 800 [OS=Homo sapiens]	Q2TB10
6,454481	6,294504	6,430543	6,459598	6,284291	6,846929	6,866118	6,900869	6,839111	6,845455	FALSK		11	+	CRVO_Control	6	12	5	1	744	0	6	0,000300615	0,0014444	0,475013065	0,232798961	TRIM3	Tripartite motif-containing protein 3 [OS=Homo sapiens]	O75382-1
6,58587	6,617334	6,049592	6,186571	6,411385	6,84102	6,957253	6,740067	6,870004	6,879486	FALSK		10			9	29	9	1	917	0	9	0,005246205	0,011117029	0,487415791	0,233409685	HKDC1	Putative hexokinase HKDC1 [OS=Homo sapiens]	Q2TB90-1
6,556718	6,498237	6,223766	6,37395	6,264852	6,88263	6,851121	6,870978	6,856702	6,838473	FALSK		21	+	CRVO_Control	24	155	24	1	548	0	24	0,001530196	0,004469163	0,476476479	0,231088867	CCT8	T-complex protein 1 subunit theta [OS=Homo sapiens]	P50990
6,441969	6,402259	6,218004	6,383989	6,476966	6,880709	6,795715	6,884058	6,923616	6,805411	FALSK	Acetyl [N-Term]	1	+	CRVO_Control	7	14	7	1	582	0	7	0,001327944	0,003992256	0,473264122	0,229828504	ZNF326	DBIRD complex subunit ZNF326 [OS=Homo sapiens]	Q5BKZ1
6,511144	6,546776	6,253248	6,23323	6,375038	6,825862	6,861016	6,789057	6,89199	6,924218	FALSK		7	+	CRVO_Control	10	159	5	1	340	1	10	0,002309072	0,006028714	0,474541378	0,229386763	GNB2	Guanine nucleotide-binding protein G(I)/G(S)/G(T) subunit beta-2 [OS=Homo sapiens]	P62879
6,380245	6,507795	6,066089	6,426265	6,525129	6,765535	7,010108	6,643856	7,081084	6,748193	FALSK		11	+	CRVO_Control	3	4	3	1	415	0	3	0,003479977	0,008183992	0,468650627	0,225766979	ACAD8	Isobutyryl-CoA dehydrogenase, mitochondrial [OS=Homo sapiens]	Q9UKU7
6,344988	6,479639	6,319106	6,394848	6,403347	6,888681	6,837313	6,849142	6,853436	6,867663	FALSK		17	+	CRVO_Control	29	113	29	1	919	0	29	0,000140528	0,000999513	0,470861435	0,23160649	NPEPPS	puromycin-sensitive aminopeptidase [OS=Homo sapiens]	P55786
6,743779	6,373047	6,103009	6,379715	6,244543	7,043566	6,540091	6,918257	6,665598	7,011026	FALSK		19			2	2	2	1	264	0	2	0,025542381	0,040112331	0,466888714	0,218736373	AES	Isoform 2 of Amino-terminal enhancer of split [OS=Homo sapiens]	Q08117-2
6,50303	6,56528	6,1856	6,393064	6,270382	6,890553	6,900184	6,889157	6,826543	6,787196	FALSK		17	+	CRVO_Control	14	39	10	1	270	4	14	0,001798983	0,005055556	0,475255394	0,230212948	PITPNA	Phosphatidylinositol transfer protein alpha isoform [OS=Homo sapiens]	Q00169
6,597172	6,416967	6,034285	6,469869	6,325654	6,949143	6,826321	6,750508	6,875489	6,861659	FALSK		19	+	CRVO_Control	3	8	3	1	336	0	3	0,001789775	0,005044636	0,483834839	0,234246987	IGLON5	IgLON family member 5 [OS=Homo sapiens]	A6NGN9
6,490953	6,329552	6,258195	6,403408	6,460245	6,903207	6,774787	6,920644	6,825115	6,864804	FALSK		2	+	CRVO_Control	6	11	6	1	565	0	6	0,000653121	0,002449041	0,469240761	0,229033858	USP39	U4/U6.U5 tri-snRNP-associated protein 2 [OS=Homo sapiens]	Q53GS9
6,016495	6,398259	6,42746	6,399908	6,640805	7,070389	6,718007	6,834654	6,934107	6,697851	FALSK		12			4	7	4	1	421	0	4	0,044929334	0,064935991	0,474416256	0,219168176	PIP4K2C	Phosphatidylinositol 5-phosphate 4-kinase type-2 gamma [OS=Homo sapiens]	Q8TBX8-1
6,547593	6,473117	6,132136	6,330806	6,43152	6,841544	6,835355	6,898552	6,81698	6,895285	FALSK		17	+	CRVO_Control	6	12	6	1	436	0	6	0,004205132	0,009410659	0,474508762	0,228038312	FBXL20	F-box/LRR-repeat protein 20 [OS=Homo sapiens]	Q96IG2-1
6,37147	6,231986	6,417156	6,488103	6,41804	6,884802	6,60339	6,807358	7,036891	6,913518	FALSK		3	+	CRVO_Control	6	10	6	1	973	0	6	0,000189354	0,001143058	0,463840675	0,227920866	ATP2C1	Isoform 7 of Calcium-transporting ATPase type 2C member 1 [OS=Homo sapiens]	P98194-7
6,486113	6,527872	6,172775	6,409371	6,333456	6,912877	6,833462	6,873302	6,831596	6,836494	FALSK		5	+	CRVO_Control	8	12	8	1	699	0	8	0,001954354	0,005349427	0,471628952	0,228353432	KIF3A	kinesin-like protein KIF3A [OS=Homo sapiens]	Q9Y496
6,650706	6,461888	6,126971	6,338952	6,332668	6,872184	6,86666	6,840461	6,874674	6,835352	FALSK	Acetyl [N-Term]	5	+	CRVO_Control	13	206	7	1	449	6	13	0,004161353	0,009345789	0,475628948	0,228581151	HNRNPH1	Heterogeneous nuclear ribonucleoprotein H [OS=Homo sapiens]	P31943
6,143784	6,507339	6,285485	6,267502	6,536197	7,047666	6,464768	6,777126	6,721971	7,117468	FALSK		3			2	2	2	1	204	0	2	0,034939458	0,052188922	0,47773838	0,221968682	THOC7	THO complex subunit 7 homolog [OS=Homo sapiens]	Q6I9Y2
6,542902	6,313639	6,433464	6,309846	6,349281	6,83654	6,878354	6,961123	6,733618	6,869112	FALSK		10	+	CRVO_Control	10	45	7	1	784	0	10	0,000680535	0,002516984	0,465922928	0,227395154	PFKP	ATP-dependent 6-phosphofructokinase, platelet type [OS=Homo sapiens]	Q01813
6,505925	6,589457	6,149632	6,457657	6,215102	6,84418	6,838573	6,930733	6,961156	6,695548	FALSK		2			14	160	11	1	245	1	14	0,006547187	0,013139432	0,470483398	0,225047262	YWHAQ	14-3-3 protein theta [OS=Homo sapiens]	P27348
6,528979	6,578026	6,100185	6,376776	6,327167	6,883487	6,872711	6,91166	6,785268	6,82401	FALSK		8			3	5	2	1	2024	0	3	0,006481843	0,013049743	0,473200417	0,226317952	PCM1	Pericentriolar material 1 protein [OS=Homo sapiens]	Q15154-1
5,856237	6,49105	7,136134	5,956561	6,022535	6,912185	6,861182	6,697867	6,882183	6,904836	FALSK		5			6	12	5	1	1225	1	6	0,112104903	0,1440643	0,559147167	0,245743608	CTNND2	Catenin delta-2 [OS=Homo sapiens]	Q9UQB3-1
6,577399	6,644464	6,085745	6,321166	6,260975	6,866356	6,935134	6,855549	6,893826	6,719687	FALSK		3			4	7	4	1	367	0	4	0,006350368	0,012853307	0,476160526	0,227728757	PCYT1A	choline-phosphate cytidylyltransferase A [OS=Homo sapiens]	P49585
6,349522	6,332801	6,386677	6,489927	6,388632	6,825772	6,909327	6,831084	6,819048	6,884386	FALSK		19	+	CRVO_Control	20	43	20	1	1215	0	20	0,000322123	0,001507614	0,464411736	0,227625287	AP3D1	Isoform 5 of AP-3 complex subunit delta-1 [OS=Homo sapiens]	O14617-5
6,516702	6,387139	6,234497	6,395891	6,421798	6,872783	6,828842	6,794521	6,907514	6,869506	FALSK		19	+	CRVO_Control	2	6	2	1	176	0	2	0,000179011	0,001110688	0,46342802	0,227777337	C19orf43	Uncharacterized protein C19orf43 [OS=Homo sapiens]	Q9BQ61
6,500613	6,564601	6,180846	6,343344	6,347429	6,859919	6,855386	6,877667	6,832271	6,852876	FALSK		17	+	CRVO_Control	6	7	4	1	334	2	6	0,002568665	0,006496204	0,468257141	0,226233909	MAP2K6	Dual specificity mitogen-activated protein kinase kinase 6 [OS=Homo sapiens]	P52564-1
6,492654	6,539349	6,275005	6,367031	6,277955	6,795747	6,835818	6,885084	6,905086	6,855483	FALSK		3	+	CRVO_Control	4	7	4	1	404	0	4	0,002449198	0,006282076	0,465044785	0,224829417	UBA5	Ubiquitin-like modifier-activating enzyme 5 [OS=Homo sapiens]	Q9GZZ9-1
6,117325	6,365426	6,454947	6,521512	6,38409	6,857544	6,848348	6,846217	6,839014	6,879559	FALSK		15	+	CRVO_Control	3	6	3	1	304	0	3	0,002449896	0,006279619	0,485476303	0,234365903	DNAJC17	DnaJ homolog subfamily C member 17 [OS=Homo sapiens]	Q9NVM6
6,546329	6,273339	6,43994	5,985958	6,520674	6,927512	6,865166	6,971507	6,442524	6,876066	FALSK		10	+	CRVO_Control	2	4	2	1	290	0	2	0,000480864	0,001975034	0,463307095	0,226610986	ECHS1	Enoyl-CoA hydratase, mitochondrial [OS=Homo sapiens]	P30084
6,647035	6,638309	5,817972	6,430718	6,249728	6,665985	6,650617	7,062845	6,971904	6,862638	FALSK		13			2	3	2	1	1237	0	2	0,099763363	0,129788233	0,48604517	0,218175904	PCDH9	Protocadherin-9 [OS=Homo sapiens]	Q9HC56
6,36498	6,380568	6,239808	6,332495	6,44956	6,768986	6,829463	6,782444	6,939174	6,855429	FALSK		X	+	CRVO_Control	2	2	2	1	632	0	2	0,000276093	0,001375388	0,481616879	0,236072554	ARMCX2	Armadillo repeat-containing X-linked protein 2 [OS=Homo sapiens]	Q7L311
6,695941	6,459966	6,102237	6,257813	6,388503	6,784542	6,856718	6,885852	6,923439	6,81394	FALSK		12			4	8	4	1	434	0	4	0,017193709	0,028726907	0,472005939	0,222613277	RSRC2	Arginine/serine-rich coiled-coil protein 2 [OS=Homo sapiens]	Q7L4I2-1
6,577913	6,343837	6,375568	6,400025	6,265849	6,7879	6,767096	6,818519	6,852984	7,031714	FALSK		16			2	4	2	1	140	0	2	0,006659483	0,013301422	0,459004116	0,219744278	TRAPPC2L	Trafficking protein particle complex subunit 2-like protein [OS=Homo sapiens]	Q9UL33-1
6,404281	6,15207	6,392425	6,403649	6,524256	6,810864	6,800292	6,819745	6,63893	7,131804	FALSK		9	+	CRVO_Control	3	6	2	1	422	0	3	0,003385468	0,008006431	0,464990807	0,22412829	CCBL1;KYAT1	Kynurenine--oxoglutarate transaminase 1 [OS=Homo sapiens]	Q16773
6,337229	6,317984	6,388647	6,439248	6,390372	6,655343	6,81436	6,808096	6,898446	7,023316	FALSK		1	+	CRVO_Control	2	3	2	1	423	0	2	0,000826765	0,002859732	0,465216255	0,226778046	GATM	glycine amidinotransferase, mitochondrial [OS=Sus scrofa]	P50441
6,451211	6,678072	6,215291	6,426265	6,159871	6,947198	6,93428	6,776104	6,804776	6,795715	FALSK		1	+	CRVO_Control	6	9	4	1	1781	0	6	0,002284287	0,00598461	0,465472889	0,225167293	CDC42BPA	Isoform 6 of Serine/threonine-protein kinase MRCK alpha [OS=Homo sapiens]	Q5VT25-6
6,175423	6,868987	6,341908	6,169724	6,185812	6,818907	6,815027	6,741421	6,955778	6,852938	FALSK		5			3	4	3	1	455	0	3	0,030833054	0,047056404	0,488443279	0,227242096	CSNK1G3	Isoform 2 of Casein kinase I isoform gamma-3 [OS=Homo sapiens]	Q9Y6M4-2
6,28968	6,074632	6,568143	6,50205	6,496654	7,05039	6,330163	6,959964	6,949528	6,868293	FALSK		18			4	8	4	1	507	0	4	0,006282627	0,012757063	0,445435905	0,213659847	CNDP1	Beta-Ala-His dipeptidase [OS=Homo sapiens]	Q96KN2
6,423581	6,519588	6,253535	6,458584	6,305374	6,891214	6,828352	6,900492	6,900878	6,72788	FALSK		7	+	CRVO_Control	7	10	7	1	482	0	7	0,001106762	0,003481938	0,45763073	0,222737122	CCZ1;CCZ1B	Vacuolar fusion protein CCZ1 homolog B [OS=Homo sapiens]	P86790
6,490698	6,450121	6,26934	6,428672	6,342473	6,8156	6,843576	6,885082	6,844233	6,875743	FALSK		2	+	CRVO_Control	12	42	10	1	387	0	12	0,000932354	0,003068191	0,456586075	0,222500524	PPM1B	Isoform Beta-2 of Protein phosphatase 1B [OS=Homo sapiens]	O75688-2
6,494175	6,357155	6,329357	6,325125	6,474912	6,896598	6,782061	6,895421	6,880162	6,805331	FALSK		X	+	CRVO_Control	16	30	13	1	1268	3	16	0,000561604	0,002201698	0,455770016	0,222808469	STAG2	Isoform 2 of Cohesin subunit SA-2 [OS=Homo sapiens]	Q8N3U4-2
6,622702	6,513284	6,143637	6,388776	6,281393	6,729279	7,02105	6,729948	6,96625	6,791162	FALSK		1			10	36	2	1	1241	0	10	0,006859231	0,013571684	0,457579327	0,219013696	ATP2B4	Plasma membrane calcium-transporting ATPase 4 [OS=Homo sapiens]	P23634-1
6,610226	6,476461	6,192273	6,375833	6,308274	6,865984	6,854846	6,850455	6,863556	6,825263	FALSK		5	+	CRVO_Control	24	1263	4	1	451	30	24	0,002462195	0,00630688	0,459407425	0,222182798	LOC100135051;TUBA1A	tubulin alpha-1A chain [OS=Sus scrofa]	P02550
6,118007	6,61388	6,247208	6,600077	6,307797	6,856846	6,962676	6,926588	6,645817	6,841655	FALSK		1			10	18	4	1	1823	0	10	0,020114377	0,032712829	0,469322681	0,220808426	KIF1B	Isoform 4 of Kinesin-like protein KIF1B [OS=Homo sapiens]	O60333-4
6,624853	6,466784	6,132368	6,388853	6,347796	6,826548	6,863385	6,7996	6,872824	6,89419	FALSK	Acetyl [N-Term]	5	+	CRVO_Control	7	47	6	1	305	0	7	0,004165134	0,009343208	0,459178162	0,220969792	HNRNPA0	Heterogeneous nuclear ribonucleoprotein A0 [OS=Homo sapiens]	Q13151
6,467425	6,4527	6,299887	6,356743	6,407251	6,844563	6,787008	6,802881	6,840477	6,961666	FALSK		16	+	CRVO_Control	3	5	3	1	422	0	3	0,000388011	0,001728494	0,45051775	0,220739044	C16orf70	UPF0183 protein C16orf70 [OS=Homo sapiens]	Q9BSU1
6,627201	6,56549	6,089566	6,192494	6,429588	6,867117	6,877772	6,847995	6,842164	6,812965	FALSK		2			3	5	3	1	819	0	3	0,009460219	0,017763095	0,468735027	0,223186419	IWS1	protein IWS1 homolog [OS=Homo sapiens]	Q96ST2
6,663844	6,443767	6,190528	6,308212	6,356414	6,891176	6,825872	6,865419	6,83153	6,841053	FALSK		22	+	CRVO_Control	30	173	23	1	729	7	30	0,003536695	0,008286534	0,458457279	0,220997261	DDX17	Probable ATP-dependent RNA helicase DDX17 [OS=Homo sapiens]	Q92841
6,337379	6,375931	6,196717	6,576674	6,474895	6,837651	6,767478	6,735923	6,78578	7,090458	FALSK		1	+	CRVO_Control	2	4	2	1	196	0	2	0,003058547	0,007399459	0,451139259	0,217891612	RER1	Protein RER1 [OS=Homo sapiens]	O15258
6,343408	6,78136	6,002253	5,97728	6,708739	6,840463	6,740118	7,001127	6,689299	6,957683	FALSK		5			2	2	2	1	3027	0	2	0,055041863	0,07757015	0,483130169	0,221613909	DMXL1	DmX-like protein 1 [OS=Homo sapiens]	Q9Y485
6,658926	6,57221	6,080926	6,324361	6,300122	6,822082	6,872157	6,803911	6,863561	6,887836	FALSK		19			4	7	4	1	333	0	4	0,010305176	0,018982955	0,462600422	0,2201442	GIPC1	PDZ domain-containing protein GIPC1 [OS=Homo sapiens]	O14908-1
6,601383	6,442523	6,131055	6,399089	6,394199	6,899552	6,836776	6,828682	6,845149	6,838259	FALSK		15	+	CRVO_Control	3	6	3	1	242	0	3	0,002312769	0,00603006	0,456033611	0,220723389	EMC7	ER membrane protein complex subunit 7 [OS=Homo sapiens]	Q9NPA0
6,609478	6,512085	6,094341	6,413994	6,323442	6,819996	6,855317	6,799346	6,874454	6,900515	FALSK		18			4	11	4	1	504	0	4	0,006046157	0,01236966	0,459257507	0,220110199	RNMT	Isoform 2 of mRNA cap guanine-N7 methyltransferase [OS=Homo sapiens]	O43148-2
6,626942	6,457379	6,216541	6,398973	6,276081	6,822725	6,89845	6,820817	6,829721	6,878645	FALSK		19	+	CRVO_Control	10	37	10	1	348	0	10	0,003703309	0,008591949	0,454888535	0,219239827	ASNA1	ATPase ASNA1 [OS=Homo sapiens]	O43681
6,670522	6,486174	6,150419	6,43786	6,195984	6,773918	6,880116	6,838567	6,828938	6,920485	FALSK		2			2	3	2	1	735	0	2	0,015480111	0,026482447	0,460212994	0,217734549	TRAPPC12	Trafficking protein particle complex subunit 12 [OS=Homo sapiens]	Q8WVT3
6,375578	6,450239	6,285388	6,470048	6,420114	6,809167	6,862328	6,853243	6,844321	6,877872	FALSK		11	+	CRVO_Control	4	6	4	1	1544	0	4	0,00016285	0,00105352	0,449112701	0,220943791	ARHGEF12	Rho guanine nucleotide exchange factor 12 [OS=Homo sapiens]	Q9NZN5
6,655918	6,405911	6,151772	6,374164	6,38284	6,82843	6,84673	6,832251	6,877131	6,865416	FALSK		13			10	22	10	1	359	0	10	0,005085343	0,010836725	0,455870438	0,218976608	MAB21L1	Protein mab-21-like 1 [OS=Homo sapiens]	Q13394
6,558951	6,451097	6,290771	6,34784	6,35138	6,847997	6,897842	6,875288	6,843596	6,781982	FALSK		5	+	CRVO_Control	25	174	23	1	586	1	25	0,000737446	0,00265747	0,449333	0,219378633	LMNB1	Lamin-B1 [OS=Homo sapiens]	P20700
6,50268	6,438012	6,169523	6,351049	6,525007	6,922656	6,893176	6,972195	6,800668	6,633715	FALSK		5			7	14	7	1	334	0	7	0,015250112	0,02617165	0,447227764	0,211962058	MAT2B	Methionine adenosyltransferase 2 subunit beta [OS=Homo sapiens]	Q9NZL9
5,491034	6,846621	6,605829	6,175896	6,340998	6,877269	6,868085	6,878149	6,77168	6,811728	FALSK		18			3	7	3	1	950	0	3	0,075872971	0,102215506	0,549306679	0,24625247	OSBPL1A	Oxysterol-binding protein-related protein 1 [OS=Homo sapiens]	Q9BXW6-1
6,613906	6,450999	6,258278	6,367799	6,302656	6,744751	6,885674	6,938588	6,839045	6,828794	FALSK		4			5	15	5	1	247	0	5	0,007519432	0,014693901	0,448642635	0,214679359	TMEM33	Transmembrane protein 33 [OS=Homo sapiens]	P57088
6,375133	6,485297	6,231663	6,452783	6,459021	6,85789	6,855426	6,966602	6,818548	6,734211	FALSK					5	19	5	1	248	0	5	0,004955493	0,010655855	0,44575634	0,214363898		Isoform 3 of Tumor protein D52 [OS=Homo sapiens]	P55327-3
6,525129	5,752213	6,60585	6,510962	6,477354	6,950702	6,714245	6,905688	6,761551	6,89724	FALSK		11			2	2	2	1	622	0	2	0,02070765	0,033562506	0,471583652	0,221690824	PGM2L1	glucose 1,6-bisphosphate synthase [OS=Homo sapiens]	Q6PCE3
6,515168	6,359865	6,35762	6,302441	6,326328	6,806445	6,813093	6,87729	6,807955	6,841936	FALSK		5	+	CRVO_Control	2	4	2	1	877	0	2	0,000448553	0,001895723	0,457059193	0,223705989	GRM6	metabotropic glutamate receptor 6 [OS=Homo sapiens]	O15303
6,477885	6,474038	6,232334	6,379022	6,448611	6,77015	6,860402	6,917492	6,864735	6,825221	FALSK		12	+	CRVO_Control	5	9	5	1	911	0	5	0,002717592	0,006804749	0,445222092	0,215356661	LEMD3	inner nuclear membrane protein Man1 [OS=Homo sapiens]	Q9Y2U8
6,604276	6,447886	6,152986	6,349318	6,434532	6,878335	6,842347	6,79563	6,859104	6,864735	FALSK		14	+	CRVO_Control	5	8	5	1	417	0	5	0,001828124	0,005126049	0,45023098	0,218422452	ACTR10	Actin-related protein 10 [OS=Homo sapiens]	Q9NZ32
6,564982	6,457657	6,119674	6,470317	6,368313	6,916452	6,829343	6,7786	6,866134	6,841536	FALSK		22	+	CRVO_Control	6	15	6	1	485	0	6	0,001308905	0,003944402	0,450224304	0,218968999	BCL2L13	Bcl-2-like protein 13 [OS=Homo sapiens]	Q9BXK5-1
6,61684	6,505708	6,106558	6,276986	6,420574	6,771966	6,645567	6,809196	7,088588	6,853323	FALSK		3			3	6	3	1	626	0	3	0,031034657	0,047249953	0,448395061	0,20977762	PEX5L	PEX5-related protein [OS=Homo sapiens]	Q8IYB4-1
6,661124	6,574225	6,0818	6,268421	6,362043	6,934974	6,833975	6,582603	6,905621	6,947081	FALSK		6	+	CRVO_Control	5	10	5	1	172	0	5	0,004525755	0,009992509	0,451328087	0,217146906	NUDT3	Diphosphoinositol polyphosphate phosphohydrolase 1 [OS=Homo sapiens]	O95989
6,442883	6,777023	5,87932	6,37196	6,335182	6,720006	6,695541	6,898766	6,71249	7,121597	FALSK		1			2	3	2	1	561	0	2	0,074136583	0,100196715	0,468406677	0,213402199	TDRKH	tudor and KH domain-containing protein [OS=Homo sapiens]	Q9Y2W6
6,743391	6,468829	6,179534	6,215381	6,335388	6,839865	6,752144	6,741263	6,862499	7,021791	FALSK		17			3	7	3	1	494	0	3	0,016241631	0,02746299	0,455007648	0,215236643	ZNF207	Isoform 4 of BUB3-interacting and GLEBS motif-containing protein ZNF207 [OS=Homo sapiens]	O43670-4
6,483812	6,548396	6,189527	6,367118	6,413116	6,874907	6,785669	6,850283	6,851325	6,873925	FALSK		1	+	CRVO_Control	23	108	22	1	707	1	23	0,002882417	0,007072649	0,446828079	0,215995242	SFPQ	splicing factor, proline- and glutamine-rich [OS=Homo sapiens]	P23246-1
6,495669	6,610268	6,183862	6,416937	6,286111	6,793221	6,850874	6,786445	6,91271	6,889874	FALSK		9	+	CRVO_Control	9	18	6	1	1189	3	9	0,00417769	0,009360298	0,448055363	0,215806917	DAB2IP	Disabled homolog 2-interacting protein [OS=Homo sapiens]	Q5VWQ8-1
6,521473	6,458029	6,120157	6,47928	6,393943	6,813164	6,896995	6,792149	6,84154	6,874013	FALSK		2	+	CRVO_Control	3	5	3	1	342	0	3	0,002231062	0,005889941	0,448995495	0,217489758	MFF	Mitochondrial fission factor [OS=Homo sapiens]	Q9GZY8-1
5,695353	6,574103	6,551291	6,590681	6,438464	6,777398	6,812825	6,793115	6,901066	6,942496	FALSK		6			3	6	3	1	204	0	3	0,040460757	0,059475273	0,475401497	0,220178839	TPD52L1	tumor protein D53 [OS=Homo sapiens]	Q16890-1
6,094724	6,618074	5,836246	6,855972	6,138466	6,735698	7,139142	6,58762	6,819112	6,828357	FALSK		19			2	2	2	1	381	0	2	0,02278668	0,036402994	0,513289261	0,239559697	CKM	Creatine kinase M-type [OS=Homo sapiens]	P06732
5,671551	7,182741	6,118649	6,152635	6,389123	6,6724	7,078356	6,421145	7,06194	6,891089	FALSK		15			3	7	3	1	419	0	3	0,061468592	0,084984476	0,522046661	0,237023021	FAH	Fumarylacetoacetase [OS=Homo sapiens]	P16930
6,327305	6,692014	6,11513	6,328212	6,400764	6,61477	6,806802	6,766957	7,010143	6,976516	FALSK		11			3	4	2	1	1849	0	3	0,014271565	0,024750001	0,462352467	0,218975322	SBF2	Myotubularin-related protein 13 [OS=Homo sapiens]	Q86WG5
6,779903	6,358069	6,254519	6,279692	6,295839	6,937152	6,902648	6,881401	6,835985	6,650968	FALSK		12			2	4	2	1	198	0	2	0,006340742	0,012840681	0,448026371	0,214828924	CDKN1B	Cyclin-dependent kinase inhibitor 1B [OS=Homo sapiens]	P46527
6,463926	6,573658	6,245848	6,372615	6,350731	6,833483	6,824628	6,968311	6,805356	6,778971	FALSK		13			6	16	6	1	365	0	6	0,004757529	0,010365399	0,440794086	0,212157378	SUGT1	Protein SGT1 homolog [OS=Homo sapiens]	Q9Y2Z0-1
6,790034	6,559803	5,811168	6,346744	6,358024	6,929379	6,937811	6,216264	6,957531	7,040015	FALSK		2			7	13	7	1	408	0	7	0,009807632	0,018306615	0,443045616	0,211407854	LOC100522477;GCDH	Glutaryl-CoA dehydrogenase, mitochondrial [OS=Sus scrofa]	P81140
5,565311	6,652355	6,399453	6,573001	6,59673	6,858964	6,785555	6,950494	6,851592	6,767476	FALSK	Acetyl [N-Term]	1			6	33	6	1	146	0	6	0,08675438	0,115075527	0,485446072	0,219175637	MAGOH	Protein mago nashi homolog [OS=Homo sapiens]	P61326
6,611735	6,44128	6,322097	6,338622	6,309175	6,850445	6,829083	6,911026	6,791809	6,84212	FALSK		4	+	CRVO_Control	10	34	10	1	370	0	10	0,001944262	0,0053295	0,440314674	0,213649176	PPID	peptidyl-prolyl cis-trans isomerase D [OS=Homo sapiens]	Q08752
6,396964	6,441631	6,316504	6,453918	6,433783	6,860293	6,841936	6,742115	6,897753	6,878198	FALSK		17	+	CRVO_Control	21	109	20	1	432	0	21	2,12E-06	0,000574415	0,435498905	0,216598241	AHCY	Adenosylhomocysteinase [OS=Sus scrofa]	Q710C4
6,495366	6,50223	6,231502	6,403408	6,400879	6,852373	6,829699	6,898267	6,802734	6,839195	FALSK		14	+	CRVO_Control	13	48	13	1	244	0	13	0,001905813	0,005254499	0,437776852	0,212487039	C14orf166	UPF0568 protein C14orf166 [OS=Homo sapiens]	Q9Y224
6,468354	6,49485	6,218857	6,415878	6,422137	6,788543	6,855051	6,756891	6,907612	6,904995	FALSK		7	+	CRVO_Control	7	12	7	1	964	0	7	0,00046356	0,001924814	0,43860302	0,214818753	CCDC132;VPS50	Syndetin [OS=Homo sapiens]	Q96JG6
6,561609	6,587852	6,085679	6,433792	6,329679	6,83289	6,881907	6,835352	6,878356	6,790299	FALSK		10			12	46	6	1	376	6	12	0,006531454	0,01312175	0,444038486	0,212922329	ACTR1A	Alpha-centractin [OS=Homo sapiens]	P61163
6,552503	6,4447	6,223296	6,378992	6,38319	6,77893	6,915859	6,774587	6,839143	6,887138	FALSK		1	+	CRVO_Control	3	5	3	1	430	0	3	0,001416441	0,004221484	0,4425951	0,215236817	BSDC1	BSD domain-containing protein 1 [OS=Homo sapiens]	Q9NW68
6,282747	6,468234	6,50425	6,148421	6,542396	6,908572	6,983988	6,57726	6,613593	7,026045	FALSK		15			2	3	2	1	653	0	2	0,01005752	0,01866278	0,432682323	0,206616414	PIAS1	Isoform 2 of E3 SUMO-protein ligase PIAS1 [OS=Homo sapiens]	O75925-2
6,530372	6,321737	6,312284	6,393834	6,485275	6,927768	6,835978	6,841062	6,842347	6,766641	FALSK		11	+	CRVO_Control	3	8	3	1	225	0	3	0,000639026	0,002422547	0,434058571	0,21226691	THYN1	Thymocyte nuclear protein 1 [OS=Homo sapiens]	Q9P016
6,78853	6,206364	6,243277	6,269606	6,458572	7,038784	6,674917	6,857125	6,857973	6,760831	FALSK		8;CHR_HSCHR8_3_CTG7	+	CRVO_Control	6	20	5	1	647	0	6	0,00375869	0,008688533	0,444656086	0,214451536	EEF1D	Isoform 2 of Elongation factor 1-delta [OS=Homo sapiens]	P29692-2
6,52904	6,422063	6,239057	6,396547	6,456314	6,917053	6,76354	6,815929	6,880649	6,83415	FALSK		11	+	CRVO_Control	8	19	8	1	514	0	8	0,000537375	0,002146667	0,433660126	0,212280142	CPSF7	Isoform 3 of Cleavage and polyadenylation specificity factor subunit 7 [OS=Homo sapiens]	Q8N684-3
6,433191	6,56392	6,323675	6,305896	6,395402	6,710595	6,710913	6,813689	6,907083	7,015584	FALSK		1			3	4	3	1	792	0	3	0,010026286	0,018623053	0,42715559	0,204102577	KIFAP3	Kinesin-associated protein 3 [OS=Homo sapiens]	Q92845
6,714013	6,368541	6,205386	6,379216	6,340134	6,798301	6,922966	6,872175	6,783076	6,834062	FALSK		11			3	17	3	1	183	0	3	0,011163416	0,020191083	0,440657997	0,209956089	C11orf58	Small acidic protein [OS=Homo sapiens]	O00193
6,369815	6,34784	6,466689	6,473234	6,401349	6,787902	6,78135	6,894547	6,798263	6,943081	FALSK		12	+	CRVO_Control	5	9	5	1	649	0	5	0,000237087	0,001269485	0,429242992	0,210993045	RECQL	ATP-dependent DNA helicase Q1 [OS=Homo sapiens]	P46063
6,473431	6,624828	6,144468	6,469103	6,29881	6,863571	6,837578	6,796885	6,867482	6,840265	FALSK		8	+	CRVO_Control	8	22	8	1	297	0	8	0,004164934	0,009348292	0,439028263	0,211621815	EMC2	ER membrane protein complex subunit 2 [OS=Homo sapiens]	Q15006
6,438558	6,447077	6,317207	6,336279	6,498682	7,018324	6,827805	6,728778	6,982315	6,600335	FALSK					4	5	3	1	870	0	4	0,011031419	0,0200192	0,423950958	0,202388751		Isoform 3 of Pre-mRNA-processing factor 40 homolog B [OS=Homo sapiens]	Q6NWY9-3
6,445663	6,470656	6,298263	6,357069	6,48776	6,85482	6,832196	6,809304	6,820948	6,887203	FALSK		21	+	CRVO_Control	3	7	3	1	165	0	3	8,19E-05	0,000755029	0,429012012	0,211728649	UBE2G2	Ubiquitin-conjugating enzyme E2 G2 [OS=Homo sapiens]	P60604
6,471608	6,562126	6,309234	6,397433	6,314473	6,820261	6,857288	6,868114	6,828366	6,830111	FALSK		2	+	CRVO_Control	26	54	22	1	1538	0	26	0,000958044	0,003125597	0,429853249	0,209749209	CLASP1	CLIP-associating protein 1 [OS=Homo sapiens]	Q7Z460-1
6,656101	6,389958	6,182603	6,439622	6,36264	6,848847	6,847311	6,871572	6,77833	6,857134	FALSK		5			13	24	13	1	557	0	13	0,006259038	0,012729621	0,434453583	0,208609898	IK	Protein Red [OS=Homo sapiens]	Q13123
6,259273	6,385431	6,093814	6,632268	6,629356	6,909293	6,916477	6,840463	6,701826	6,829088	FALSK		12			2	2	2	1	396	0	2	0,028220838	0,043596251	0,43940115	0,206228732	ACTR6	Actin-related protein 6 [OS=Homo sapiens]	Q9GZN1
6,747818	6,439691	6,295259	6,34126	6,143517	6,787803	6,778231	6,911071	6,769947	6,943834	FALSK		9			8	12	8	1	1098	0	8	0,025908094	0,040619349	0,444668198	0,208895909	TDRD7	tudor domain-containing protein 7 [OS=Homo sapiens]	Q8NHU6
6,569856	6,551516	6,287251	6,345183	6,294621	6,910493	6,787902	6,793116	6,864186	6,84549	FALSK		17	+	CRVO_Control	2	2	2	1	641	0	2	0,002089695	0,005614481	0,430552197	0,208932122	EPN2	epsin-2 [OS=Homo sapiens]	O95208-1
6,554549	6,518037	6,230229	6,399844	6,34747	6,877049	6,815017	6,858532	6,839503	6,814052	FALSK	Acetyl [N-Term]	1	+	CRVO_Control	19	100	2	1	545	18	19	0,001890063	0,00522628	0,430804729	0,209213627	CCT3	T-complex protein 1 subunit gamma [OS=Homo sapiens]	P49368-1
6,473291	6,574686	6,181553	6,448752	6,300539	6,669253	6,86855	7,018755	6,880132	6,703527	FALSK		5			3	7	3	1	394	0	3	0,016852149	0,028243367	0,432279205	0,204919756	PHAX	Phosphorylated adapter RNA export protein [OS=Homo sapiens]	Q9H814
6,489347	6,536478	6,217575	6,444297	6,361538	6,792305	6,862145	6,756834	6,897076	6,890261	FALSK		17	+	CRVO_Control	4	9	4	1	176	0	4	0,000976162	0,003165638	0,429876995	0,209735752	VPS25	Vacuolar protein-sorting-associated protein 25 [OS=Homo sapiens]	Q9BRG1
6,534691	6,502833	6,238938	6,334386	6,432797	6,807878	6,807564	6,887521	6,873445	6,820566	FALSK		5	+	CRVO_Control	7	9	6	1	1060	0	7	0,003792905	0,008756944	0,430665588	0,207918234	RBM27	RNA-binding protein 27 [OS=Homo sapiens]	Q9P2N5
6,635129	6,3134	6,256108	6,462078	6,377306	6,954187	6,778042	6,833491	6,865841	6,76233	FALSK		19	+	CRVO_Control	2	5	2	1	102	0	2	0,00059075	0,002285236	0,429974079	0,210404922	DDA1	DET1- and DDB1-associated protein 1 [OS=Homo sapiens]	Q9BW61
6,356113	6,556741	6,535887	6,403699	6,038802	6,873396	6,858887	6,890003	6,83898	6,688449	FALSK		3	+	CRVO_Control	9	21	9	1	963	0	9	0,001829763	0,005126853	0,451694775	0,219109855	IQSEC1	IQ motif and SEC7 domain-containing protein 1 [OS=Homo sapiens]	Q6DN90-1
6,684234	6,424886	6,218197	6,412773	6,295384	6,816339	6,865348	6,847983	6,851736	6,821833	FALSK		16			8	21	8	1	227	0	8	0,00643738	0,012980909	0,433552742	0,208129433	NUDT21	Cleavage and polyadenylation specificity factor subunit 5 [OS=Homo sapiens]	O43809
6,433789	6,468613	6,206331	6,531384	6,406733	6,827649	6,879952	6,772111	6,863698	6,84579	FALSK		18	+	CRVO_Control	4	7	4	1	583	0	4	0,00037235	0,001678451	0,428470135	0,210185031	TTC39C	Tetratricopeptide repeat protein 39C [OS=Homo sapiens]	Q8N584-1
6,544278	6,505618	6,388828	6,206834	6,37881	6,942848	6,655795	6,903761	6,830035	6,841069	FALSK		16			5	7	5	1	569	0	5	0,005543831	0,011598601	0,429827881	0,206745862	RABEP2	rab GTPase-binding effector protein 2 [OS=Homo sapiens]	Q9H5N1
6,334493	6,50655	6,397244	6,430383	6,406648	6,772211	6,891276	6,777074	6,797512	6,947425	FALSK		8	+	CRVO_Control	8	35	4	1	212	4	8	0,000191914	0,001145742	0,422036076	0,207690659	RAB2A	Ras-related protein Rab-2A [OS=Homo sapiens]	P61019-1
6,440328	6,593161	6,182136	6,396547	6,44536	6,827774	6,825277	6,861707	6,873782	6,80735	FALSK		1	+	CRVO_Control	6	43	6	1	215	0	6	0,004493973	0,009939703	0,427671528	0,20618722	SEC22B	Vesicle-trafficking protein SEC22b [OS=Homo sapiens]	O75396
6,564616	6,421125	6,261867	6,372732	6,441799	6,804522	6,885078	6,856091	6,822069	6,820467	FALSK		X	+	CRVO_Control	2	4	2	1	365	0	2	0,00183585	0,005132526	0,425217533	0,206622376	PHF6	PHD finger protein 6 [OS=Homo sapiens]	Q8IWS0-1
6,522629	6,644234	6,258777	6,239126	6,351768	6,924795	6,562729	6,944486	6,960149	6,751967	FALSK		15			5	22	2	1	433	0	5	0,041549071	0,060862645	0,425518608	0,198492648	FAM98B	Isoform 2 of Protein FAM98B [OS=Homo sapiens]	Q52LJ0-2
6,862969	6,37395	6,214406	6,265762	6,26216	6,972085	6,675241	6,842486	6,79636	6,891174	FALSK		19			9	32	9	1	850	0	9	0,012541187	0,022279119	0,439619541	0,209144618	EML2	Isoform 3 of Echinoderm microtubule-associated protein-like 2 [OS=Homo sapiens]	O95834-3
6,675543	6,496646	6,155807	6,342473	6,368066	6,809651	6,859835	6,906184	6,892982	6,717675	FALSK		17			8	74	8	1	292	0	8	0,014413168	0,024961316	0,429558468	0,204178622	SRSF1	Isoform ASF-2 of Serine/arginine-rich splicing factor 1 [OS=Homo sapiens]	Q07955-2
6,509233	6,552275	6,209928	6,352978	6,4404	6,849863	6,839195	6,826529	6,865419	6,812489	FALSK		2	+	CRVO_Control	92	469	84	1	2364	8	92	0,002156593	0,005753445	0,425736427	0,206612514	SPTBN1	Spectrin beta chain, non-erythrocytic 1 [OS=Homo sapiens]	Q01082-1
6,662353	6,546812	6,315213	6,340738	6,173527	6,908609	6,81185	6,874887	6,803974	6,786504	FALSK		17			4	8	4	1	407	0	4	0,004596043	0,010118235	0,429436302	0,206961471	PCYT2	Isoform 3 of Ethanolamine-phosphate cytidylyltransferase [OS=Homo sapiens]	Q99447-3
6,662465	6,385283	6,223831	6,367918	6,422902	6,851643	6,803476	6,889258	6,870978	6,770509	FALSK		16			8	16	6	1	727	2	8	0,005845178	0,012082372	0,424693203	0,204255088	CTCF	Transcriptional repressor CTCF [OS=Homo sapiens]	P49711-1
6,300867	6,262756	6,496632	6,62402	6,377454	6,865973	6,955456	6,467572	6,960589	6,877468	FALSK		14			2	2	2	1	2078	0	2	0,029467477	0,045263859	0,41306572	0,194426069	ATG2B	autophagy-related protein 2 homolog B [OS=Homo sapiens]	Q96BY7
6,507293	6,474067	6,281693	6,443481	6,382838	6,794485	6,762049	6,822725	6,785851	7,006167	FALSK		1	+	CRVO_Control	7	81	2	1	136	0	7	0,003934437	0,00899605	0,416381168	0,201184454	HIST2H3A;HIST2H3C;HIST2H3D	histone H3.2 [OS=Homo sapiens]	Q71DI3
6,714658	6,410233	6,182171	6,346312	6,390309	6,837941	6,830992	6,862883	6,8208	6,828392	FALSK		19			5	9	5	1	645	0	5	0,008687593	0,016575071	0,427464771	0,204609767	SUGP1	SURP and G-patch domain-containing protein 1 [OS=Homo sapiens]	Q8IWZ8-1
6,874059	6,268659	6,031219	6,221104	6,554589	6,451211	6,790512	6,958843	6,748193	7,145678	FALSK		6			3	4	2	1	1271	0	3	0,130148357	0,163972224	0,428961277	0,192731166	SCAF8	Protein SCAF8 [OS=Homo sapiens]	Q9UPN6
6,504599	6,460232	6,346642	6,393173	6,393119	6,82335	6,83271	6,838513	6,833436	6,85731	FALSK		2	+	CRVO_Control	27	61	27	1	768	0	27	0,000190269	0,001143124	0,417510796	0,205505464	CUL3	Cullin-3 [OS=Homo sapiens]	Q13618
6,442095	6,493399	6,246963	6,450334	6,459821	6,852998	6,816952	6,872191	6,83478	6,804707	FALSK		11	+	CRVO_Control	15	45	15	1	895	0	15	0,001506195	0,004422916	0,417803383	0,203406628	SF3B2	Splicing factor 3b subunit 2 [OS=Homo sapiens]	Q13435
6,742692	6,514549	6,162354	6,29462	6,313601	6,710302	6,696712	6,951788	6,963991	6,834554	FALSK		8			2	5	2	1	397	0	2	0,049890696	0,071157122	0,425906467	0,197794112	VPS37A	Vacuolar protein sorting-associated protein 37A [OS=Homo sapiens]	Q8NEZ2
6,561737	6,416129	6,282228	6,418922	6,411695	6,861425	6,821878	6,766787	6,846286	6,879595	FALSK		9	+	CRVO_Control	10	16	10	1	822	0	10	0,000213102	0,001207579	0,417051983	0,205189613	GTF3C4	General transcription factor 3C polypeptide 4 [OS=Homo sapiens]	Q9UKN8
6,527121	6,350496	6,317793	6,42348	6,478043	6,866642	6,849624	6,814381	6,80856	6,839476	FALSK		1	+	CRVO_Control	25	194	25	1	825	0	25	0,000256806	0,001308538	0,416350079	0,204690308	HNRNPU	Heterogeneous nuclear ribonucleoprotein U [OS=Homo sapiens]	Q00839
6,597098	6,536677	6,115688	6,436234	6,382623	6,836034	6,898917	6,804416	6,846684	6,786496	FALSK		16			7	43	5	1	526	2	7	0,004655081	0,010200817	0,420845413	0,20294259	FUS	RNA-binding protein FUS [OS=Homo sapiens]	P35637-1
6,699697	6,563748	6,206208	6,190796	6,386236	6,82081	6,848619	6,861049	6,798251	6,846742	FALSK		5			20	104	18	1	684	4	20	0,013007725	0,022946619	0,425757122	0,202756998	DPYSL3	Isoform LCRMP-4 of Dihydropyrimidinase-related protein 3 [OS=Homo sapiens]	Q14195-2
6,621507	6,455203	6,20289	6,405461	6,401702	6,810228	6,788896	6,811661	6,824118	6,929323	FALSK		10			14	32	14	1	1150	0	14	0,004825592	0,010459587	0,415492439	0,200381821	CCAR1	Cell division cycle and apoptosis regulator protein 1 [OS=Homo sapiens]	Q8IX12
6,508543	6,621216	6,18181	6,376739	6,370675	6,961733	6,685242	6,904046	6,751518	6,847447	FALSK		19			2	4	2	1	223	0	2	0,016846927	0,028247103	0,418200779	0,198582607	CCDC124	Coiled-coil domain-containing protein 124 [OS=Homo sapiens]	Q96CT7
6,578919	6,432712	6,430922	6,407612	6,247376	6,851124	6,754275	6,854801	6,880196	6,823756	FALSK		13	+	CRVO_Control	7	12	7	1	504	0	7	0,001577111	0,004563989	0,413322353	0,201217833	DNAJC3	DnaJ homolog subfamily C member 3 [OS=Homo sapiens]	Q13217
6,468277	6,523792	6,319417	6,423541	6,377116	6,764193	6,89046	6,848623	6,860413	6,804113	FALSK		3	+	CRVO_Control	16	36	16	1	693	0	16	0,000448913	0,001895131	0,411131763	0,20165388	GMPS	GMP synthase [glutamine-hydrolyzing] [OS=Homo sapiens]	P49915
6,670785	6,436291	6,151936	6,430689	6,384156	6,798182	6,870357	6,936984	6,800685	6,746883	FALSK		14			4	11	4	1	717	0	4	0,017209017	0,028739816	0,415846729	0,197457023	PNN	Pinin [OS=Homo sapiens]	Q9H307
6,20472	6,819081	5,98958	6,357734	6,60277	6,858419	7,023464	6,537365	6,687199	7,00165	FALSK		11			6	37	6	1	331	0	6	0,005764585	0,011961434	0,426842308	0,205279441	RCN1	Reticulocalbin-1 [OS=Homo sapiens]	Q15293
6,391458	6,661008	6,286004	6,37932	6,380194	6,858586	6,795065	6,937815	6,846094	6,719721	FALSK	Acetyl [N-Term]	17;CHR_HSCHR17_2_CTG2			20	300	18	1	255	3	20	0,008525668	0,016340146	0,411859608	0,197491428	YWHAE	14-3-3 protein epsilon [OS=Homo sapiens]	P62258-1
6,283551	6,909293	6,078951	6,380245	6,338068	6,738768	6,827819	6,883865	6,842979	6,866661	FALSK		2			3	5	3	1	304	0	3	0,039230448	0,057868726	0,433996677	0,202443599	GULP1	PTB domain-containing engulfment adapter protein 1 [OS=Homo sapiens]	Q9UBP9
6,205549	6,648178	6,74685	6,1918	6,234578	6,595444	6,756223	6,922436	6,82273	7,031219	FALSK		17			2	2	2	1	974	0	2	0,032816253	0,049505139	0,420219326	0,19717426	PITPNM3	Membrane-associated phosphatidylinositol transfer protein 3 [OS=Homo sapiens]	Q9BZ71
6,61879	6,531313	6,147712	6,475725	6,31011	6,800245	6,867272	6,760219	6,862279	6,870978	FALSK		14			21	64	15	1	628	6	21	0,005997307	0,012309578	0,415468597	0,19993045	KLC1	Isoform N of Kinesin light chain 1 [OS=Homo sapiens]	Q07866-6
6,703211	6,687901	6,006747	6,189825	6,414474	6,96116	6,589464	6,96116	6,994353	6,601399	FALSK		12			2	2	2	1	4471	0	2	0,100392582	0,130517242	0,421075916	0,191586225	DNAH10	Dynein heavy chain 10, axonemal [OS=Homo sapiens]	Q8IVF4-1
6,445954	6,38111	6,420153	6,463272	6,4169	6,774116	6,844973	7,019939	6,703099	6,800668	FALSK		13	+	CRVO_Control	8	13	8	1	958	0	8	0,002759817	0,006869643	0,403081131	0,195552022	DIS3	exosome complex exonuclease RRP44 [OS=Homo sapiens]	Q9Y2L1-1
6,511314	6,620835	6,211551	6,346744	6,402485	6,79057	6,854867	6,784249	6,90737	6,81988	FALSK		4	+	CRVO_Control	13	63	5	1	439	7	13	0,004077161	0,00922777	0,412801361	0,199447391	sep-11	Isoform 2 of Septin-11 [OS=Homo sapiens]	Q9NVA2-2
6,645905	6,472488	6,2663	6,300049	6,413497	6,857962	6,81314	6,806046	6,882555	6,80147	FALSK		12	+	CRVO_Control	10	78	8	1	372	0	10	0,00362023	0,008445718	0,412586784	0,199561531	HNRNPA1	Heterogeneous nuclear ribonucleoprotein A1 [OS=Homo sapiens]	P09651-1
6,55612	6,479198	6,229542	6,412688	6,419003	6,854461	6,828239	6,83329	6,819284	6,820563	FALSK		9	+	CRVO_Control	17	43	12	1	672	0	17	0,001361139	0,004079113	0,411857224	0,200723923	STRBP	spermatid perinuclear RNA-binding protein [OS=Homo sapiens]	Q96SI9
6,593181	6,521203	6,227813	6,4085	6,355764	6,808913	6,862317	6,767442	6,867183	6,852314	FALSK		12	+	CRVO_Control	15	53	15	1	406	0	15	0,002217453	0,005870367	0,410341549	0,199311012	DCTN2	Isoform 2 of Dynactin subunit 2 [OS=Homo sapiens]	Q13561-2
6,631773	6,548762	6,224809	6,33984	6,346903	6,87281	6,819539	6,791755	6,866295	6,805061	FALSK		X	+	CRVO_Control	4	7	4	1	350	0	4	0,003427686	0,008086097	0,412674618	0,19969869	RP2	Protein XRP2 [OS=Homo sapiens]	O75695
5,968823	6,688586	6,439201	6,539392	6,395419	6,834533	6,877711	6,805404	6,845469	6,794198	FALSK		7			5	8	5	1	834	0	5	0,021354386	0,034478056	0,425178623	0,200954946	STRIP2	Striatin-interacting protein 2 [OS=Homo sapiens]	Q9ULQ0-1
6,537607	6,489396	6,18634	6,478991	6,415277	6,850161	6,871716	6,815304	6,851085	6,768111	FALSK		7	+	CRVO_Control	2	6	2	1	176	0	2	0,001866714	0,005188205	0,409753227	0,199288029	VKORC1L1	Vitamin K epoxide reductase complex subunit 1-like protein 1 [OS=Homo sapiens]	Q8N0U8
6,57434	6,403061	6,370791	6,370481	6,402485	6,760469	6,836693	6,811781	6,785851	6,953931	FALSK		3	+	CRVO_Control	6	14	3	1	514	3	6	0,002471926	0,006314739	0,405513382	0,196868227	TBL1XR1	F-box-like/WD repeat-containing protein TBL1XR1 [OS=Homo sapiens]	Q9BZK7
6,614025	6,61477	6,228342	6,326965	6,30186	6,822598	6,885334	6,829134	6,883592	6,727924	FALSK		11			8	15	8	1	2087	0	8	0,005817533	0,012038355	0,412523937	0,198628889	ARHGAP32	rho GTPase-activating protein 32 [OS=Homo sapiens]	A7KAX9
6,342549	6,314498	6,644381	6,079731	6,5347	6,953991	6,811325	6,862939	6,656866	6,792641	FALSK		1			4	6	4	1	1759	0	4	0,006104366	0,012448441	0,432380199	0,207710781	CASZ1	Zinc finger protein castor homolog 1 [OS=Homo sapiens]	Q86V15-1
6,440224	6,274023	5,630577	6,622163	6,77986	6,965641	6,956667	6,228683	7,004549	6,585188	FALSK		4			2	3	2	1	1072	0	2	0,063251169	0,086973226	0,398775864	0,184932401	PCDH7	Isoform B of Protocadherin-7 [OS=Homo sapiens]	O60245-2
6,645896	6,45342	6,190398	6,346887	6,468319	6,830312	6,837938	6,856644	6,84911	6,774522	FALSK		19			10	35	8	1	917	2	10	0,007772669	0,015087655	0,408721066	0,196254773	SAFB	Isoform 3 of Scaffold attachment factor B1 [OS=Homo sapiens]	Q15424-3
6,118635	6,696131	6,198024	6,596715	6,435786	6,783935	6,798265	6,885068	6,823265	6,853792	FALSK		6			3	4	3	1	387	0	3	0,022487525	0,036000932	0,41980648	0,198379496	NELFE;RDBP	Isoform 2 of Negative elongation factor E [OS=Homo sapiens]	P18615-3
6,247518	6,451216	6,407447	6,466062	6,511007	6,631757	6,808473	6,954166	6,822207	6,885068	FALSK		4	+	CRVO_Control	4	6	3	1	841	0	4	0,00036588	0,001661139	0,403684425	0,198259122	STIM2	Isoform 2 of Stromal interaction molecule 2 [OS=Homo sapiens]	Q9P246-2
6,646003	6,441276	6,249506	6,35931	6,425426	6,816909	6,828392	6,80853	6,827792	6,867249	FALSK		11	+	CRVO_Control	21	100	21	1	747	0	21	0,003345155	0,007920976	0,405470276	0,196363604	HNRNPUL2	heterogeneous nuclear ribonucleoprotein U-like protein 2 [OS=Homo sapiens]	Q1KMD3
6,366169	6,647185	6,278906	6,473272	6,354318	6,794378	6,835363	6,927734	6,823327	6,762858	FALSK		8			7	12	6	1	1132	1	7	0,005481187	0,011512011	0,404761982	0,195143755	ASAP1	Isoform 1 of Arf-GAP with SH3 domain, ANK repeat and PH domain-containing protein 1 [OS=Homo sapiens]	Q9ULH1-2
6,567068	6,476265	6,243217	6,399813	6,439677	6,718751	6,827596	6,818188	6,883	6,879402	FALSK		12			4	6	4	1	972	0	4	0,0050819	0,01083548	0,400179482	0,193154217	NAA25	N-alpha-acetyltransferase 25, NatB auxiliary subunit [OS=Homo sapiens]	Q14CX7-1
6,102238	6,343408	6,169925	6,483816	6,90689	6,756223	7,067165	6,716991	6,627899	6,9331	FALSK		11			2	2	2	1	237	0	2	0,040576621	0,059576286	0,419020176	0,195765338	REXO2	Oligoribonuclease, mitochondrial [OS=Homo sapiens]	Q9Y3B8-1
6,538633	6,51157	6,369957	6,346381	6,373639	6,818489	6,893604	6,831556	6,796241	6,803063	FALSK		22	+	CRVO_Control	9	66	9	1	369	0	9	0,000267247	0,001338353	0,400554752	0,197017478	ST13	Hsc70-interacting protein [OS=Homo sapiens]	P50502
6,576198	6,420031	6,400391	6,420609	6,308876	6,866466	6,613793	6,946434	6,808852	6,88571	FALSK		12			3	5	3	1	317	0	3	0,005515195	0,011557825	0,399030113	0,192466114	RNF41	E3 ubiquitin-protein ligase NRDP1 [OS=Homo sapiens]	Q9H4P4
6,46596	6,578936	6,24003	6,421829	6,428602	6,629297	6,939536	6,684946	6,902065	6,957068	FALSK		7	+	CRVO_Control	21	93	7	1	421	14	21	0,00352247	0,008263418	0,395511341	0,191605624	IDH2	Isocitrate dehydrogenase [NADP], mitochondrial [OS=Sus scrofa]	P33198
6,653738	6,514781	6,245007	6,38709	6,318541	6,839005	6,80853	6,808389	6,865167	6,821856	FALSK		17			3	5	2	1	723	0	3	0,004673411	0,010223255	0,404758072	0,195443207	GGA3	ADP-ribosylation factor-binding protein GGA3 [OS=Homo sapiens]	Q9NZ52
6,641324	6,480327	6,278863	6,382819	6,34693	6,878952	6,807341	6,847367	6,818865	6,789207	FALSK		7	+	CRVO_Control	14	219	12	1	353	2	14	0,002014329	0,005481924	0,402293873	0,195650177	HNRNPA2B1	heterogeneous nuclear ribonucleoproteins A2/B1 [OS=Homo sapiens]	P22626
6,662582	6,4189	6,192502	6,397979	6,429398	6,868161	6,737293	6,759888	6,906981	6,809818	FALSK		14	+	CRVO_Control	2	3	2	1	736	0	2	0,003679109	0,008551504	0,396155453	0,191836829	ZC3H14	Zinc finger CCCH domain-containing protein 14 [OS=Homo sapiens]	Q6PJT7-1
6,485067	6,461037	6,357734	6,411475	6,442668	6,766117	6,886906	6,827082	6,822586	6,834146	FALSK		5	+	CRVO_Control	14	147	4	1	248	12	14	0,000228417	0,00124594	0,395771122	0,194825642	TPI1	Triosephosphate isomerase [OS=Sus scrofa]	Q29371
6,348086	6,652366	6,194688	6,441189	6,485067	6,753933	6,81396	6,774315	6,900768	6,889194	FALSK		2	+	CRVO_Control	8	128	3	1	1192	6	8	0,004109449	0,009273167	0,402154636	0,194458539	RTN4	Reticulon-4 [OS=Homo sapiens]	Q9NQC3
6,767672	6,503027	6,233845	6,317399	6,269303	6,832834	6,987512	6,829571	6,723808	6,749587	FALSK		8			5	8	5	1	335	0	5	0,010903892	0,019816229	0,406413364	0,19440866	POLB	DNA polymerase beta [OS=Homo sapiens]	P06746
6,564514	6,696271	6,006181	6,383786	6,423676	6,932171	6,688457	6,758075	6,859223	6,886913	FALSK		5			5	66	4	1	542	1	5	0,028668616	0,044197935	0,410082245	0,193202648	SLC1A3	Excitatory amino acid transporter 1 [OS=Homo sapiens]	P43003
6,166737	6,93007	6,357874	5,835333	6,438703	6,891007	6,752239	6,849797	6,789179	6,84641	FALSK		17			5	5	5	1	552	0	5	0,064961952	0,089131654	0,47998333	0,219166417	BAIAP2	Brain-specific angiogenesis inhibitor 1-associated protein 2 [OS=Homo sapiens]	Q9UQB8
6,270161	6,510122	6,485888	6,461822	6,394279	6,894156	6,741003	6,804428	6,962064	6,712807	FALSK		14			3	4	3	1	834	0	3	0,005067345	0,010810525	0,398437023	0,192347478	EML1	Isoform 3 of Echinoderm microtubule-associated protein-like 1 [OS=Homo sapiens]	O00423-3
6,09768	6,622685	6,219163	6,668856	6,472003	6,778034	6,870008	6,896635	6,770674	6,814812	FALSK		X			12	27	11	1	520	0	12	0,024350876	0,038496318	0,409955025	0,193711666	MAOB	Amine oxidase [flavin-containing] B [OS=Sus scrofa]	Q6PLK3
6,799572	6,356079	6,239953	6,340091	6,31731	6,762452	6,931183	6,82603	6,723913	6,84849	FALSK		6			2	2	2	1	822	0	2	0,025186647	0,039635774	0,407812691	0,192642041	KDM1B	Lysine-specific histone demethylase 1B [OS=Homo sapiens]	Q8NB78-1
6,574584	6,472455	6,338583	6,413419	6,359241	6,837542	6,81185	6,779163	6,812944	6,888538	FALSK	Acetyl [N-Term]	6	+	CRVO_Control	23	105	23	1	556	0	23	0,000941748	0,003096415	0,39435091	0,192828327	TCP1	T-complex protein 1 subunit alpha [OS=Homo sapiens]	P17987
6,458584	6,345095	6,338331	6,479516	6,529377	6,845176	6,796803	6,833966	6,764764	6,883407	FALSK		6;CHR_HSCHR6_MHC_COX_CTG1;CHR_HSCHR6_MHC_DBB_CTG1;CHR_HSCHR6_MHC_MANN_CTG1;CHR_HSCHR6_MHC_MCF_CTG1;CHR_HSCHR6_MHC_QBL_CTG1	+	CRVO_Control	4	9	3	1	406	1	4	0,000430125	0,001857181	0,394642544	0,19375277	RING1	E3 ubiquitin-protein ligase RING1 [OS=Homo sapiens]	Q06587
6,214538	6,505378	6,505975	6,413925	6,502988	6,760526	6,90005	6,909957	6,755407	6,793469	FALSK		15	+	CRVO_Control	2	7	2	1	423	0	2	0,000764881	0,002699875	0,395321178	0,193517662	MPI	mannose-6-phosphate isomerase [OS=Homo sapiens]	P34949
6,656757	6,591523	6,25537	6,330907	6,291579	6,875288	6,881407	6,843568	6,830321	6,690477	FALSK		6	+	CRVO_Control	11	36	11	1	335	0	11	0,004037934	0,009160867	0,3989851	0,193006191	SUS2DD;DHDH	Trans-1,2-dihydrobenzene-1,2-diol dehydrogenase [OS=Sus scrofa]	Q9TV69
6,594209	6,633405	5,928246	6,441494	6,468139	6,881985	6,716093	6,828808	6,865898	6,827144	FALSK		2			4	9	4	1	459	0	4	0,038427433	0,056772564	0,410887241	0,19243591	CHN1	N-chimaerin [OS=Homo sapiens]	P15882
6,581925	6,552692	6,226429	6,386272	6,404677	6,848792	6,842663	6,868898	6,802191	6,762203	FALSK		12	+	CRVO_Control	7	17	2	1	189	4	7	0,004221344	0,009430239	0,394550228	0,190854794	KRAS	GTPase KRas [OS=Homo sapiens]	P01116
5,880225	6,220159	6,393497	6,929515	6,534484	5,711726	6,106832	7,254041	7,446647	6,87907	FALSK		22			6	26	6	1	205	0	6	0,211783682	0,251447522	0,288087082	0,131304903	CRYBB2	Beta-crystallin B2 [OS=Homo sapiens]	P43320
6,662405	6,514924	6,212083	6,41921	6,327116	6,779139	6,864414	6,807275	6,788972	6,877124	FALSK		22			9	21	9	1	669	0	9	0,009547718	0,017918515	0,396237087	0,190048825	GTPBP1	GTP-binding protein 1 [OS=Homo sapiens]	O00178
6,510153	6,633885	6,290639	6,391272	6,329069	6,724478	6,917921	6,771446	6,889927	6,810199	FALSK		14	+	CRVO_Control	7	20	7	1	367	0	7	0,002727319	0,006815602	0,391790581	0,190250313	NDRG2	Isoform 6 of Protein NDRG2 [OS=Homo sapiens]	Q9UN36-6
6,039772	6,585385	6,411161	6,552672	6,481839	6,75746	6,869922	6,812192	6,754786	6,91142	FALSK		7			5	10	3	1	766	2	5	0,009753304	0,018214175	0,406989861	0,194940609	BRAF	serine/threonine-protein kinase B-raf [OS=Homo sapiens]	P15056
6,547661	6,480385	6,284261	6,491625	6,366143	6,829691	6,780042	6,777933	6,820644	6,908342	FALSK		22	+	CRVO_Control	4	13	4	1	126	0	4	0,001907484	0,005255286	0,389315701	0,18957767	SNRPD3	small nuclear ribonucleoprotein sm d3 [OS=Homo sapiens]	P62318
6,513564	6,487741	6,307387	6,380245	6,48652	6,839212	6,812352	6,902539	6,760159	6,801348	FALSK		8	+	CRVO_Control	8	31	8	1	301	0	8	0,001855458	0,005175895	0,388030815	0,189004242	TCEA1	Transcription elongation factor A protein 1 [OS=Homo sapiens]	P23193
6,706641	6,499845	6,21223	6,379284	6,339849	6,794387	6,804119	6,875902	6,857876	6,786549	FALSK		X			6	42	6	1	391	0	6	0,014549143	0,025127928	0,396196556	0,189021465	RBMX	RNA-binding motif protein, X chromosome [OS=Homo sapiens]	P38159-1
6,4931	6,607111	6,249244	6,421082	6,386287	6,74103	6,813553	6,745306	6,878952	6,926261	FALSK		2			5	9	5	1	782	0	5	0,004569559	0,010071627	0,389655781	0,188430116	ERCC3	TFIIH basal transcription factor complex helicase XPB subunit [OS=Homo sapiens]	P19447
6,472325	6,437087	6,596713	6,314956	6,298235	6,834091	6,894323	6,773983	6,919075	6,653543	FALSK		10			3	6	3	1	341	0	3	0,004996321	0,010695118	0,391140079	0,188969105	CCNY	cyclin-Y [OS=Homo sapiens]	Q8ND76
6,411826	6,530518	6,309895	6,532455	6,387139	6,814381	6,862324	6,84479	6,811213	6,786567	FALSK		1	+	CRVO_Control	14	31	14	1	844	0	14	0,000824205	0,002853482	0,389488697	0,190644317	CSDE1	Isoform 4 of Cold shock domain-containing protein E1 [OS=Homo sapiens]	O75534-4
6,511747	6,467515	6,351644	6,360128	6,483812	6,858924	6,813441	6,810733	6,813122	6,82145	FALSK		8	+	CRVO_Control	5	11	5	1	221	0	5	0,000147999	0,001020114	0,388564682	0,191636531	VPS28	vacuolar protein sorting-associated protein 28 homolog [OS=Homo sapiens]	Q9UK41-1
6,559472	6,540696	6,177549	6,507057	6,244022	6,820641	6,807543	6,686698	6,917478	6,853387	FALSK		12	+	CRVO_Control	2	2	2	1	520	0	2	0,003746407	0,008676011	0,411390018	0,198940859	CSAD	Isoform 3 of Cysteine sulfinic acid decarboxylase [OS=Homo sapiens]	Q9Y600-3
6,481942	6,478311	6,310158	6,431227	6,483801	6,83541	6,841089	6,825778	6,830989	6,782433	FALSK		19	+	CRVO_Control	16	43	16	1	640	0	16	0,000438307	0,001877537	0,386052036	0,189593533	UBA2	SUMO-activating enzyme subunit 2 [OS=Homo sapiens]	Q9UBT2
6,604306	6,553052	6,240244	6,41922	6,347723	6,799605	6,820034	6,781972	6,852963	6,859087	FALSK		6			26	108	20	1	589	6	26	0,00460583	0,010122146	0,389823246	0,188494961	PPP2R1A	serine/threonine-protein phosphatase 2A 65 kDa regulatory subunit A alpha isoform [OS=Sus scrofa]	P54612
6,351492	6,465581	6,389636	6,474037	6,419989	6,707216	6,958745	6,733658	6,813289	6,838496	FALSK		5	+	CRVO_Control	5	10	5	1	279	0	5	0,000187076	0,001132914	0,390133858	0,192238376	MBLAC2	Metallo-beta-lactamase domain-containing protein 2 [OS=Homo sapiens]	Q68D91-1
6,485103	6,385396	6,368655	6,406289	6,543952	6,974955	6,701045	6,790113	6,844695	6,785558	FALSK		1	+	CRVO_Control	5	12	5	1	272	0	5	0,001061362	0,003384039	0,381394196	0,186501752	TIPRL	TIP41-like protein [OS=Homo sapiens]	O75663
6,536512	6,54837	6,302193	6,400143	6,393053	6,833656	6,784918	6,912209	6,804985	6,770058	FALSK		5	+	CRVO_Control	22	98	22	1	505	0	22	0,003749757	0,008678467	0,385111141	0,186622906	LOC733658;RTCB	tRNA-splicing ligase RtcB homolog [OS=Sus scrofa]	Q19PY3
6,530509	6,513493	6,356942	6,383695	6,403847	6,81396	6,80588	6,800268	6,881287	6,805953	FALSK		17	+	CRVO_Control	7	11	7	1	410	0	7	0,000794908	0,002777417	0,383772469	0,187940964	MAP2K4	Isoform 2 of Dual specificity mitogen-activated protein kinase kinase 4 [OS=Homo sapiens]	P45985-2
6,622206	6,538273	6,293301	6,377206	6,340595	6,803388	6,772784	6,765431	6,911077	6,851903	FALSK		1			6	18	6	1	541	0	6	0,006446529	0,012992445	0,386600685	0,186392373	SNX27	Sorting nexin-27 [OS=Homo sapiens]	Q96L92
6,576664	6,518945	6,296044	6,417654	6,362768	6,878908	6,922431	6,676123	6,814724	6,803758	FALSK		9	+	CRVO_Control	4	6	4	1	626	0	4	7,36E-05	0,000721224	0,38477354	0,190208199	CRAT	Carnitine O-acetyltransferase [OS=Homo sapiens]	P43155
6,599471	6,515421	6,24739	6,445877	6,368751	6,7833	6,787751	6,831588	6,860464	6,842974	FALSK		X			60	116	60	1	4374	0	60	0,00564944	0,011774067	0,385833645	0,18627599	HUWE1	E3 ubiquitin-protein ligase HUWE1 [OS=Homo sapiens]	Q7Z6Z7
6,726951	6,488275	6,385415	6,318951	6,209517	6,841677	6,766318	6,871786	6,826669	6,785042	FALSK		7			2	8	2	1	188	0	2	0,010060743	0,018659627	0,392477036	0,188202797	GGCT	gamma-glutamylcyclotransferase [OS=Homo sapiens]	O75223-1
6,629912	6,575145	6,171877	6,456073	6,320196	6,762831	6,748896	6,827805	6,843898	6,916428	FALSK		6;CHR_HSCHR6_MHC_COX_CTG1;CHR_HSCHR6_MHC_DBB_CTG1;CHR_HSCHR6_MHC_MCF_CTG1;CHR_HSCHR6_MHC_QBL_CTG1;CHR_HSCHR6_MHC_SSTO_CTG1			6	8	6	1	723	0	6	0,021548825	0,034688575	0,389330864	0,184838808	VPS52	Vacuolar protein sorting-associated protein 52 homolog [OS=Homo sapiens]	Q8N1B4
6,399856	6,518988	6,348662	6,255789	6,622369	6,854334	6,80235	6,858906	6,895475	6,679665	FALSK	Acetyl [N-Term]	2			9	36	8	1	387	1	9	0,01813022	0,029935393	0,38901329	0,185178125	PALM	Paralemmin-1 [OS=Sus scrofa]	Q2MJV8
6,574994	6,586211	6,271809	6,360746	6,380827	6,816972	6,892919	6,825576	6,809743	6,759511	FALSK		6	+	CRVO_Control	9	15	9	1	1834	0	9	0,002083565	0,005601983	0,386026573	0,187901896	MLLT4	Isoform 5 of Afadin [OS=Homo sapiens]	P55196-5
6,574763	6,596539	6,222031	6,377287	6,39746	6,889728	6,768791	6,809901	6,859441	6,774103	FALSK		15			4	12	4	1	617	0	4	0,005514987	0,011563782	0,386776447	0,186758435	VPS33B	Vacuolar protein sorting-associated protein 33B [OS=Homo sapiens]	Q9H267
6,681551	6,462647	6,18778	6,428767	6,403055	6,795001	6,809021	6,812352	6,817623	6,872207	FALSK		17			21	40	21	1	1970	0	21	0,009669808	0,018093901	0,388480473	0,186449897	POLR2A	DNA-directed RNA polymerase II subunit RPB1 [OS=Homo sapiens]	P24928
6,856084	6,33714	6,23189	6,404318	6,276392	6,817478	6,830352	6,838542	6,8565	6,75679	FALSK		22			2	3	2	1	300	0	2	0,023887632	0,037890382	0,398767662	0,188769275	ANKRD54	Ankyrin repeat domain-containing protein 54 [OS=Homo sapiens]	Q6NXT1-1
6,363962	6,508551	6,459598	6,237433	6,598667	6,937577	6,729095	6,806802	6,831874	6,787437	FALSK		2			3	6	3	1	476	0	3	0,010834103	0,019708294	0,38491497	0,184561647	AUP1	Ancient ubiquitous protein 1 [OS=Homo sapiens]	Q9Y679-1
6,494984	6,411475	6,42209	6,440222	6,407327	6,907084	6,882883	6,70768	6,755425	6,813718	FALSK		14	+	CRVO_Control	5	6	4	1	2581	1	5	0,000373676	0,001682428	0,378138542	0,185904991	CHD8	Chromodomain-helicase-dna-binding protein 8 [OS=Homo sapiens]	Q9HCK8-1
6,481276	6,114689	6,564835	6,44756	6,43073	6,751708	6,814798	6,766318	6,802042	6,924738	FALSK		11			4	9	4	1	707	0	4	0,010341182	0,019030786	0,404102898	0,19347797	CLPB	Caseinolytic peptidase B protein homolog [OS=Homo sapiens]	Q9H078-1
6,514616	6,5157	6,253404	6,460082	6,450418	6,82843	6,803784	6,806572	6,870331	6,791163	FALSK		2	+	CRVO_Control	30	91	30	1	1278	0	30	0,001315681	0,003961675	0,381212139	0,186177503	DCTN1	Dynactin subunit 1 [OS=Homo sapiens]	Q14203
6,33845	6,232629	6,957418	6,246164	6,053535	6,742601	6,834497	6,838417	6,828856	6,824583	FALSK		11			4	6	4	1	330	0	4	0,04304135	0,062613108	0,448151493	0,208129833	AIP	AH receptor-interacting protein [OS=Homo sapiens]	O00170
6,532269	6,469606	6,134295	6,64299	6,317133	6,895984	6,713971	6,797359	6,978769	6,628387	FALSK		5			2	2	2	1	349	0	2	0,006151186	0,012523709	0,383635139	0,185098874	TAF7	Transcription initiation factor TFIID subunit 7 [OS=Homo sapiens]	Q15545
6,620872	6,550688	6,160288	6,446793	6,394871	6,813088	6,82136	6,806052	6,844862	6,813745	FALSK		8			14	38	14	1	923	0	14	0,007591089	0,014811024	0,385119057	0,185392697	CCAR2;KIAA1967	Cell cycle and apoptosis regulator protein 2 [OS=Homo sapiens]	Q8N163-1
6,653917	6,554576	6,161981	6,431285	6,367964	6,829074	6,842886	6,797012	6,856111	6,772806	FALSK		1			4	17	4	1	174	0	4	0,007368953	0,014451992	0,385633564	0,185688997	RBM8A;LOC101060541	RNA-binding protein 8A [OS=Homo sapiens]	Q9Y5S9
6,651228	6,403432	6,291414	6,440454	6,408452	6,766838	6,847222	6,749518	6,836482	6,88996	FALSK		11			8	27	8	1	504	0	8	0,004895395	0,010568588	0,379008198	0,183333513	PRPF19	Pre-mRNA-processing factor 19 [OS=Homo sapiens]	Q9UMS4
6,504473	6,505925	6,289067	6,438561	6,471664	6,794414	6,776758	6,866013	6,82271	6,831815	FALSK		3	+	CRVO_Control	12	25	11	1	621	1	12	0,002287743	0,005989527	0,376403618	0,183219301	FXR1	Fragile X mental retardation syndrome-related protein 1 [OS=Homo sapiens]	P51114-1
6,512085	6,370656	6,356343	6,449447	6,524789	6,863567	6,78853	6,821328	6,793758	6,825902	FALSK		6	+	CRVO_Control	17	66	9	1	443	8	17	0,000205814	0,001180395	0,375953197	0,185284759	DDX39B	Isoform 2 of Spliceosome RNA helicase DDX39B [OS=Homo sapiens]	Q13838-2
6,628561	6,478881	6,248806	6,450305	6,384994	6,743357	6,880183	6,778686	6,853703	6,830031	FALSK		2			2	19	2	1	111	0	2	0,00564692	0,011775287	0,37888279	0,183034472	PTMA	Prothymosin alpha [OS=Homo sapiens]	P06454-1
6,646422	6,426136	6,302938	6,449255	6,373262	6,85048	6,797628	6,871992	6,788555	6,781331	FALSK		9	+	CRVO_Control	14	41	14	1	790	0	14	0,003003446	0,007317523	0,378394604	0,183791784	NCBP1	Nuclear cap-binding protein subunit 1 [OS=Homo sapiens]	Q09161
6,656527	6,464042	6,263023	6,404289	6,407692	6,8246	6,802815	6,826521	6,802184	6,837196	FALSK		17;CHR_HSCHR17_1_CTG2	+	CRVO_Control	53	116	53	1	2335	0	53	0,004154969	0,009336982	0,37954874	0,183850583	PRPF8	Pre-mRNA-processing-splicing factor 8 [OS=Homo sapiens]	Q6P2Q9
6,718415	6,369205	6,284391	6,476532	6,327709	6,851411	6,83214	6,762635	6,7901	6,85135	FALSK	Acetyl [N-Term]	20			7	17	7	1	563	0	7	0,005932138	0,012202243	0,382276917	0,184531271	CTNNBL1	Beta-catenin-like protein 1 [OS=Homo sapiens]	Q8WYA6
6,350389	6,478359	6,501154	6,420153	6,467619	6,72558	6,929496	6,867172	6,682313	6,870665	FALSK		15	+	CRVO_Control	7	14	7	1	1057	0	7	0,000281144	0,001384178	0,37151041	0,182911531	MAN2C1	Isoform 4 of Alpha-mannosidase 2C1 [OS=Homo sapiens]	Q9NTJ4-4
6,605926	6,597588	6,294679	6,31355	6,376509	6,874408	6,889435	6,710234	6,810255	6,798867	FALSK		14	+	CRVO_Control	4	9	4	1	335	0	4	0,000909674	0,003009227	0,378989506	0,185511633	OSGEP	Probable tRNA N6-adenosine threonylcarbamoyltransferase [OS=Homo sapiens]	Q9NPF4
6,384017	6,300008	6,545788	6,500396	6,468083	6,785782	6,648291	6,931742	6,85028	6,855414	FALSK		6	+	CRVO_Control	14	45	14	1	457	0	14	4,12E-06	0,000578359	0,374643421	0,186315701	FKBP5	Peptidyl-prolyl cis-trans isomerase FKBP5 [OS=Homo sapiens]	Q13451-1
6,397707	6,597495	6,295221	6,460128	6,457788	6,791162	6,852996	6,806534	6,76354	6,872783	FALSK		19	+	CRVO_Control	13	26	13	1	435	0	13	0,00109435	0,003448612	0,375735283	0,183762509	AP1M1	Isoform 2 of AP-1 complex subunit mu-1 [OS=Homo sapiens]	Q9BXS5-2
6,427751	6,531108	6,349426	6,523186	6,374096	6,796453	6,750257	6,798263	6,841496	6,895344	FALSK		15	+	CRVO_Control	7	11	7	1	875	0	7	0,001976076	0,005393306	0,375248814	0,182856822	UBE3A	Ubiquitin-protein ligase E3A [OS=Homo sapiens]	Q05086
6,738089	6,547308	6,224284	6,27216	6,38171	6,813123	6,866573	6,862295	6,774957	6,768155	FALSK		3			2	4	2	1	318	0	2	0,01521839	0,026129038	0,384310341	0,18349278	FYTTD1	UAP56-interacting factor [OS=Homo sapiens]	Q96QD9-1
6,745383	6,501438	6,197679	6,352053	6,372225	7,013347	6,790402	6,800731	6,674796	6,783693	FALSK		3	+	CRVO_Control	4	9	4	1	434	0	4	0,003457303	0,008145827	0,378838253	0,183796994	TRNT1	CCA tRNA nucleotidyltransferase 1, mitochondrial [OS=Homo sapiens]	Q96Q11-1
6,521938	6,618384	6,184409	6,425949	6,442668	6,814935	6,88674	6,846742	6,844803	6,687069	FALSK		1			5	20	5	1	276	0	5	0,008160468	0,015775794	0,377388096	0,181669502	STX12	Syntaxin-12 [OS=Homo sapiens]	Q86Y82
6,777933	6,429426	6,152774	6,432117	6,365549	6,807242	6,811736	6,812798	6,834075	6,821272	FALSK		19;CHR_HG26_PATCH			16	73	16	1	589	0	16	0,019289465	0,031574423	0,385864925	0,183583944	HNRNPL	Heterogeneous nuclear ribonucleoprotein L [OS=Homo sapiens]	P14866
6,555819	6,228254	6,606467	6,282408	6,506923	6,881028	6,668085	6,896883	6,850491	6,763431	FALSK		20	+	CRVO_Control	2	4	2	1	178	0	2	0,00274937	0,006848135	0,376009083	0,182788155	NAA20	N-alpha-acetyltransferase 20 [OS=Homo sapiens]	P61599
6,799981	6,457253	6,224223	6,388842	6,281679	6,802191	6,760756	6,906896	6,840444	6,769289	FALSK		9			10	40	10	1	397	0	10	0,027211777	0,042330672	0,385519314	0,18242518	DNAJA1	DnaJ homolog subfamily A member 1 [OS=Homo sapiens]	P31689-1
6,671301	6,390893	6,32455	6,498664	6,304996	6,796967	6,804386	6,801706	6,807763	6,867592	FALSK		20			4	6	4	1	704	0	4	0,007434764	0,014558465	0,377602196	0,181945274	PCIF1	Phosphorylated CTD-interacting factor 1 [OS=Homo sapiens]	Q9H4Z3
6,512487	6,555351	6,329456	6,482145	6,338959	6,816341	6,817603	6,827763	6,830974	6,794247	FALSK		17	+	CRVO_Control	33	131	19	1	951	15	33	0,001126733	0,003527205	0,373705769	0,182761057	AP2B1	Isoform 2 of AP-2 complex subunit beta [OS=Homo sapiens]	P63010-2
6,517906	6,460511	6,362667	6,32549	6,55226	6,854664	6,76261	6,825268	6,822694	6,818791	FALSK		15	+	CRVO_Control	4	8	4	1	666	0	4	0,001190681	0,003681788	0,373038387	0,182383713	LEO1	RNA polymerase-associated protein LEO1 [OS=Homo sapiens]	Q8WVC0-1
6,785737	6,782739	6,258714	5,181701	6,432986	7,063289	6,662245	6,272431	7,016581	6,731271	FALSK		1			2	3	2	1	306	0	2	0,261283874	0,302820901	0,460787964	0,195867199	AIDA	Axin interactor, dorsalization-associated protein [OS=Homo sapiens]	Q96BJ3-1
6,668396	6,482928	6,243719	6,421223	6,387925	6,755188	6,8306	6,877035	6,828963	6,783445	FALSK		19;CHR_HSCHR19_4_CTG3_1;CHR_HSCHR19LRC_COX1_CTG3_1;CHR_HSCHR19LRC_COX2_CTG3_1;CHR_HSCHR19LRC_LRC_I_CTG3_1;CHR_HSCHR19LRC_LRC_J_CTG3_1;CHR_HSCHR19LRC_LRC_S_CTG3_1;CHR_HSCHR19LRC_LRC_T_CTG3_1;CHR_HSCHR19LRC_PGF1_CTG3_1;CHR_HSCHR19LRC_PGF2_CTG3_1			7	12	7	1	499	0	7	0,012725223	0,022542674	0,374208164	0,179288376	PRPF31	U4/U6 small nuclear ribonucleoprotein Prp31 [OS=Homo sapiens]	Q8WWY3
5,916581	6,536962	5,739587	6,375957	6,967965	6,742499	6,662023	6,910764	6,900822	6,776526	FALSK		7			11	89	4	1	354	0	11	0,112765636	0,144668198	0,491116333	0,219009315	GNAI1	Guanine nucleotide-binding protein G(i) subunit alpha-1 [OS=Homo sapiens]	P63096-1
6,68017	6,638549	6,212713	6,558375	6,042072	6,760133	6,877669	6,783932	6,926538	6,722357	FALSK		4			6	21	6	1	288	0	6	0,023456071	0,037283843	0,387749863	0,183878372	APOA1BP	NAD(P)H-hydrate epimerase [OS=Sus scrofa]	Q0PIT9
6,510941	6,311026	6,537292	6,577008	6,260388	6,846897	6,816268	6,956269	6,899028	6,516281	FALSK		4	+	CRVO_Control	2	4	2	1	346	0	2	0,001036249	0,003337654	0,367617798	0,179931892	C4orf27;HPF1	Histone PARylation factor 1 [OS=Homo sapiens]	Q9NWY4
6,194297	6,568534	6,389413	6,435472	6,616144	7,006673	6,556601	6,856728	6,815006	6,804028	FALSK		6;CHR_HSCHR6_MHC_COX_CTG1;CHR_HSCHR6_MHC_DBB_CTG1;CHR_HSCHR6_MHC_MCF_CTG1;CHR_HSCHR6_MHC_QBL_CTG1			5	9	5	1	129	0	5	0,057102354	0,07990957	0,367035198	0,171623273	PFDN6	Prefoldin subunit 6 [OS=Homo sapiens]	O15212
6,66142	6,453578	6,279841	6,455224	6,367196	6,829571	6,774121	6,766102	6,855448	6,848182	FALSK		16	+	CRVO_Control	32	69	32	1	1102	0	32	0,003286424	0,00781118	0,371232605	0,180286052	USP7	Ubiquitin carboxyl-terminal hydrolase 7 [OS=Homo sapiens]	Q93009
6,713545	6,491034	6,164652	6,4255	6,401721	6,802178	6,831976	6,774085	6,835295	6,828337	FALSK		14			8	19	8	1	536	0	8	0,011234233	0,020251535	0,375083923	0,179960127	SNW1	SNW domain-containing protein 1 [OS=Homo sapiens]	Q13573
6,318497	6,422059	6,466204	6,447901	6,552678	6,798121	6,7924	6,80351	6,777597	6,883528	FALSK		8	+	CRVO_Control	4	5	4	1	562	0	4	0,000203997	0,001177094	0,36956377	0,182185926	PDP1	Isoform 2 of [Pyruvate dehydrogenase [acetyl-transferring]]-phosphatase 1, mitochondrial [OS=Homo sapiens]	Q9P0J1-2
6,579329	6,620036	6,245024	6,366211	6,401928	6,79952	6,869621	6,857246	6,779115	6,762858	FALSK		4			12	22	11	1	771	1	12	0,006025265	0,012333574	0,371166611	0,179322101	TRIM2	Isoform 2 of Tripartite motif-containing protein 2 [OS=Homo sapiens]	Q9C040-2
6,452765	6,54399	6,351969	6,530731	6,341111	6,760078	6,781713	6,861293	6,850701	6,802771	FALSK		1	+	CRVO_Control	7	9	6	1	1110	1	7	0,001949644	0,00534039	0,36719799	0,179047219	TRIM33	Isoform Beta of E3 ubiquitin-protein ligase TRIM33 [OS=Homo sapiens]	Q9UPN9-2
6,758794	6,441988	6,455324	6,301879	6,222016	6,832246	6,775438	6,754862	6,90146	6,785918	FALSK		1			2	4	2	1	575	0	2	0,017629054	0,02927365	0,373984528	0,178424465	FGGY	Isoform 4 of FGGY carbohydrate kinase domain-containing protein [OS=Homo sapiens]	Q96C11-3
6,65647	6,542439	6,299434	6,451169	6,213401	6,679941	6,888052	6,827991	6,786922	6,856704	FALSK		19			9	34	5	1	368	0	9	0,023454471	0,037296938	0,375339508	0,178287562	SH3GL1	Endophilin-A2 [OS=Homo sapiens]	Q99961
6,644556	6,642888	6,186286	6,362714	6,362811	6,857946	6,87281	6,77343	6,804812	6,756883	FALSK		5			13	29	13	1	1096	0	13	0,00584621	0,012077919	0,373325539	0,180381008	LARP1	La-related protein 1 [OS=Homo sapiens]	Q6PKG0-1
6,56375	6,276335	6,551832	6,413622	6,426311	6,827726	6,709356	6,869405	6,867278	6,784719	FALSK		5	+	CRVO_Control	7	10	7	1	1137	0	7	0,000494416	0,002019754	0,365326595	0,179491274	MSH3	DNA mismatch repair protein MSH3 [OS=Homo sapiens]	P20585
6,47871	6,625622	6,296383	6,358471	6,459432	6,802894	6,851065	6,648355	6,795669	6,946255	FALSK		20	+	CRVO_Control	9	18	9	1	941	0	9	0,001306084	0,00394217	0,365123844	0,178502922	PRPF6	Pre-mRNA-processing factor 6 [OS=Homo sapiens]	O94906-1
6,72194	6,366122	6,356493	6,319489	6,420829	6,787811	6,924727	6,820821	6,730585	6,777576	FALSK		6			4	6	4	1	835	0	4	0,011185592	0,020202277	0,371329212	0,178239802	CMTR1;FTSJD2	Cap-specific mRNA (nucleoside-2'-O-)-methyltransferase 1 [OS=Homo sapiens]	Q8N1G2
6,624194	6,502882	6,331345	6,400345	6,378562	6,816952	6,805264	6,79952	6,866557	6,776411	FALSK		12	+	CRVO_Control	12	24	6	1	799	6	12	0,002270787	0,005961602	0,365475368	0,178045776	STAT5A	Signal transducer and activator of transcription 5A [OS=Sus scrofa]	Q9TUZ1
6,604876	6,466439	6,327318	6,523554	6,312111	6,685771	6,904434	6,805244	6,863537	6,798818	FALSK		4			3	6	3	1	217	0	3	0,008488159	0,016276485	0,364701176	0,175710846	GAR1	H/ACA ribonucleoprotein complex subunit 1 [OS=Homo sapiens]	Q9NY12-1
6,646681	6,570054	6,269587	6,289477	6,440126	6,7858	6,837864	6,785241	6,766171	6,887522	FALSK		2			4	12	4	1	733	0	4	0,006683122	0,013341609	0,369334602	0,178290583	EPB41L5	Band 4.1-like protein 5 [OS=Homo sapiens]	Q9HCM4
6,578179	6,551906	6,307234	6,424507	6,381079	6,819537	6,795715	6,821399	6,813776	6,814419	FALSK		7	+	CRVO_Control	17	76	17	1	531	0	17	0,002447339	0,006281558	0,364388084	0,177437752	CCT6A	T-complex protein 1 subunit zeta [OS=Homo sapiens]	P40227-1
6,490249	6,603365	6,357203	6,383102	6,378174	6,802408	6,895269	6,66863	6,828349	6,841059	FALSK		3	+	CRVO_Control	6	11	6	1	621	0	6	0,00057935	0,002245722	0,36472435	0,179070852	ACAD9	Acyl-CoA dehydrogenase family member 9, mitochondrial [OS=Homo sapiens]	Q9H845
6,345872	6,486562	6,387937	6,567891	6,454211	6,877872	6,711948	6,6629	6,862095	6,925468	FALSK		16	+	CRVO_Control	14	30	14	1	520	0	14	0,003864475	0,008878925	0,359562206	0,174557399	OXCT1	Succinyl-CoA:3-ketoacid coenzyme A transferase 1, mitochondrial [OS=Sus scrofa]	Q29551
6,459319	6,705848	5,918224	6,466569	6,595071	6,680182	6,877128	6,685676	6,789767	7,001558	FALSK		2			5	15	5	1	340	0	5	0,023186283	0,036901426	0,377856064	0,179455229	SFXN5	Sideroflexin-5 [OS=Homo sapiens]	Q8TD22
6,657403	6,363652	6,421375	6,434628	6,366872	6,840444	6,819386	6,847997	6,752692	6,80022	FALSK		2	+	CRVO_Control	5	16	5	1	424	0	5	0,002050125	0,005539576	0,363361835	0,177164082	SCRN3	secernin-3 [OS=Homo sapiens]	Q0VDG4-1
6,441417	6,720626	6,166907	6,405461	6,47478	6,69209	6,998872	6,762215	6,66653	6,911632	FALSK		17			3	6	3	1	476	0	3	0,005525965	0,011567605	0,364429092	0,17631391	GAS7	Growth arrest-specific protein 7 [OS=Homo sapiens]	O60861-3
5,942785	6,586112	6,368639	6,689035	6,535626	6,818285	6,611084	6,863348	6,780858	6,951223	FALSK		11			2	5	2	1	166	0	2	0,067861938	0,092641198	0,380519772	0,176727867	MRPL49	39S ribosomal protein L49, mitochondrial [OS=Homo sapiens]	Q13405
6,618509	6,552987	6,184873	6,47928	6,387139	6,831588	6,838027	6,688159	6,922266	6,763795	FALSK		14	+	CRVO_Control	6	34	5	1	272	0	6	0,002243134	0,005909466	0,36420927	0,177459601	SRSF5	Serine/arginine-rich splicing factor 5 [OS=Homo sapiens]	Q13243-1
6,722414	6,55994	6,172925	6,405988	6,346918	6,81698	6,806678	6,836027	6,821435	6,777405	FALSK		1			15	75	15	1	390	0	15	0,01796245	0,029710143	0,370068169	0,176595074	ILF2	Interleukin enhancer-binding factor 2 [OS=Homo sapiens]	Q12905
7,195921	6,277984	6,133362	6,193286	6,144641	6,78326	6,829711	6,680753	6,836336	6,91587	FALSK		5			10	52	9	1	332	0	10	0,118723512	0,151491362	0,420147324	0,189928509	HNRNPAB	Isoform 2 of Heterogeneous nuclear ribonucleoprotein A/B [OS=Homo sapiens]	Q99729-2
6,334726	6,836047	6,130349	6,594697	6,259193	6,727843	6,628667	6,912649	7,045321	6,697646	FALSK		17			6	34	6	1	427	0	6	0,081630981	0,109235103	0,371422672	0,171916832	NGFR	Tumor necrosis factor receptor superfamily member 16 [OS=Homo sapiens]	P08138
6,645298	6,65948	6,186456	6,402294	6,316425	6,77309	6,72519	6,753521	6,919838	6,874719	FALSK		22			6	9	5	1	1893	1	6	0,029846876	0,045790979	0,367281055	0,173968475	SBF1	Isoform 4 of Myotubularin-related protein 5 [OS=Homo sapiens]	O95248-4
6,671992	6,474884	6,336514	6,436294	6,32191	6,83214	6,767601	6,850408	6,780047	6,822708	FALSK		6			3	7	3	1	86	0	3	0,005489473	0,011523029	0,362261963	0,175309564	SF3B5	Splicing factor 3B subunit 5 [OS=Homo sapiens]	Q9BWJ5
6,128234	6,643022	6,351741	6,590954	6,499814	6,818902	6,796322	6,776074	6,827817	6,836	FALSK	Acetyl [N-Term]	2			11	69	4	1	201	0	11	0,016457731	0,027717129	0,368270206	0,175984701	RAB1B	ras-related protein Rab-1B [OS=Sus scrofa]	Q06AU7
6,418303	6,384885	6,271395	6,575784	6,559238	6,821167	6,953614	6,70194	6,863292	6,681228	FALSK		16			2	3	2	1	597	0	2	0,008423182	0,016201056	0,362327194	0,174622283	GAN	Gigaxonin [OS=Homo sapiens]	Q9H2C0
6,860621	6,441535	6,206232	6,186738	6,370905	7,053857	6,836213	6,66266	6,709552	6,733004	FALSK			+	CRVO_Control	4	13	2	1	289	0	4	0,002240696	0,005907149	0,38585062	0,187721219	CBR1	Carbonyl reductase [NADPH] 1 [OS=Sus scrofa]	Q28960
6,453588	6,756119	6,265476	6,357499	6,386106	6,803661	6,952642	6,790379	6,804119	6,689266	FALSK		8	+	CRVO_Control	8	33	8	1	243	0	8	0,003049846	0,007397292	0,364256001	0,177093311	QDPR	dihydropteridine reductase [OS=Sus scrofa]	Q8MJ30
6,450571	6,555529	6,355684	6,481297	6,41953	6,824624	6,786587	6,814302	6,768565	6,858602	FALSK		5	+	CRVO_Control	14	38	14	1	1176	0	14	0,001201906	0,003710444	0,358013821	0,175185247	LARS	Leucine--tRNA ligase, cytoplasmic [OS=Homo sapiens]	Q9P2J5
6,153637	6,734607	6,605561	6,352678	6,338583	6,696047	6,885931	6,963751	6,712483	6,76789	FALSK		13	+	CRVO_Control	10	21	10	1	539	0	10	0,004462905	0,009894078	0,368207264	0,178416332	PCCB	propionyl-CoA carboxylase beta chain, mitochondrial [OS=Sus scrofa]	P79384
6,407016	6,416642	6,478762	6,455207	6,477427	6,823367	6,779181	6,82291	6,772259	6,846498	FALSK		1	+	CRVO_Control	7	10	7	1	927	0	7	2,46E-05	0,000519116	0,361832428	0,179449655	WDR47	Isoform 4 of WD repeat-containing protein 47 [OS=Homo sapiens]	O94967-4
6,706193	6,597291	6,164907	6,411594	6,330806	6,771489	6,757228	6,730724	6,88261	6,900862	FALSK	Acetyl [N-Term]	16			2	7	2	1	182	0	2	0,026030262	0,040794015	0,366424561	0,173976007	DCTN5	Dynactin subunit 5 [OS=Homo sapiens]	Q9BTE1
6,659963	6,545898	6,234455	6,439378	6,352254	6,789736	6,798954	6,727676	6,830119	6,895631	FALSK		3			2	3	2	1	102	0	2	0,00904636	0,017113149	0,362033653	0,174356364	LSM3	U6 snRNA-associated Sm-like protein LSm3 [OS=Homo sapiens]	P62310
6,777155	6,377287	6,258168	6,435456	6,371521	6,800786	6,824637	6,787225	6,85237	6,78479	FALSK		15;7			8	37	6	1	183	1	8	0,014206569	0,024659846	0,366044235	0,175299759	CBX3;C15orf57	chromobox protein homolog 3 [OS=Homo sapiens]	Q13185
6,477026	6,499419	6,404579	6,463356	6,427814	6,827523	6,791475	6,809676	6,800054	6,820776	FALSK		12	+	CRVO_Control	24	140	24	1	535	0	24	6,28E-05	0,000688455	0,355462456	0,175942683	CCT2	T-complex protein 1 subunit beta [OS=Homo sapiens]	P78371-1
6,231412	6,399981	6,312462	6,637585	6,565584	6,955121	6,951541	6,704465	6,723091	6,663857	FALSK		2			3	3	3	1	222	0	3	0,041647179	0,060912213	0,370210266	0,174202989	CHMP3	Charged multivesicular body protein 3 [OS=Homo sapiens]	Q9Y3E7
6,59094	6,525562	6,293301	6,400843	6,44571	6,815304	6,784385	6,794182	6,793147	6,861705	FALSK			+	CRVO_Control	3	4	3	1	1917	0	3	0,002207672	0,005852646	0,358473778	0,174753826		Isoform 4 of E3 ubiquitin-protein ligase UBR3 [OS=Homo sapiens]	Q6ZT12-4
6,426015	6,510948	6,412701	6,497403	6,429581	6,81185	6,808637	6,756192	6,78065	6,88964	FALSK		3	+	CRVO_Control	8	49	5	1	215	3	8	0,000381936	0,00170745	0,354064083	0,174239501	RAB5A	Ras-related protein Rab-5A [OS=Homo sapiens]	P20339
6,596188	6,513331	6,313479	6,43523	6,405069	6,825872	6,832888	6,814421	6,788413	6,789108	FALSK		X	+	CRVO_Control	31	161	31	1	1058	0	31	0,001270161	0,003855227	0,357480812	0,174875553	UBA1	Ubiquitin-like modifier-activating enzyme 1 [OS=Homo sapiens]	P22314
6,620226	6,617109	6,20032	6,416178	6,360188	6,810307	6,750775	6,825858	6,723402	6,92276	FALSK		1			3	9	2	1	140	1	3	0,021007857	0,033976445	0,363816166	0,17336307	ENSA	Isoform 4 of Alpha-endosulfine [OS=Homo sapiens]	O43768-4
6,773252	6,613856	6,128944	6,472752	6,185425	6,860942	6,801984	6,757285	6,819367	6,804885	FALSK	Acetyl [N-Term]	8			11	116	11	1	223	0	11	0,027303878	0,042439116	0,374046898	0,177269381	UCHL1	Ubiquitin carboxyl-terminal hydrolase isozyme L1 [OS=Sus scrofa]	Q6SEG5
6,489396	6,514906	6,400764	6,45658	6,41364	6,813635	6,797312	6,8377	6,81649	6,779115	FALSK		12	+	CRVO_Control	51	234	49	1	1230	2	51	0,000157681	0,001034201	0,35379324	0,174665254	CAND1	cullin-associated nedd8-dissociated protein 1 [OS=Homo sapiens]	Q86VP6-1
6,623513	6,617443	6,159159	6,332704	6,475688	6,878928	6,805465	6,741003	6,866611	6,741166	FALSK		7			4	4	4	1	921	0	4	0,010435586	0,01913948	0,364933586	0,175428159	FAM115A;TCAF1	TRPM8 channel-associated factor 1 [OS=Homo sapiens]	Q9Y4C2-1
6,665301	6,412682	6,333499	6,415079	6,415769	6,781961	6,782012	6,823464	6,83541	6,819891	FALSK		4			6	11	6	1	1133	0	6	0,004892884	0,010569188	0,360081577	0,174462792	TRAPPC11	trafficking protein particle complex subunit 11 [OS=Homo sapiens]	Q7Z392
6,124942	7,00078	6,021031	6,190804	6,69209	6,592345	7,112158	6,52642	6,605412	7,089299	FALSK		8			3	7	3	1	335	0	3	0,005525892	0,011573844	0,379197407	0,183218531	DECR1	2,4-dienoyl-CoA reductase, mitochondrial [OS=Homo sapiens]	Q16698
6,597678	6,682117	6,031912	6,369442	6,507203	6,792422	6,756319	6,777364	6,712182	6,98294	FALSK		11			4	9	4	1	142	0	4	0,034550179	0,051709329	0,366574669	0,173205628	FKBP2	Peptidyl-prolyl cis-trans isomerase FKBP2 [OS=Homo sapiens]	P26885
6,641962	6,532339	6,212639	6,435096	6,424562	6,887523	6,697511	6,704116	6,828239	6,901964	FALSK		14			10	19	10	1	2146	0	10	0,005323734	0,011224847	0,35455122	0,171741321	YLPM1	Isoform 4 of YLP motif-containing protein 1 [OS=Homo sapiens]	P49750-4
6,679459	6,56747	6,155795	6,382361	6,448412	6,855511	6,807823	6,855465	6,810565	6,706946	FALSK		12			3	10	3	1	210	0	3	0,018828524	0,030899971	0,360562515	0,172150165	SARNP	SAP domain-containing ribonucleoprotein [OS=Homo sapiens]	P82979
6,499198	6,411725	6,442299	6,517082	6,409393	6,765485	6,862402	6,67304	6,771422	6,952739	FALSK		10			8	28	8	1	385	0	8	0,005013235	0,010713177	0,349078274	0,169257619	CAMK1D	calcium/calmodulin-dependent protein kinase type 1D [OS=Homo sapiens]	Q8IU85-1
6,514101	6,561406	6,307339	6,427103	6,467273	6,814421	6,792341	6,774245	6,792946	6,863567	FALSK		1	+	CRVO_Control	21	68	2	1	644	19	21	0,000957353	0,003126034	0,35205965	0,172542259	FUBP1	Far upstream element-binding protein 1 [OS=Homo sapiens]	Q96AE4
6,601227	6,455126	6,32994	6,443704	6,436805	6,853183	6,766027	6,807544	6,882303	6,715566	FALSK		1	+	CRVO_Control	5	12	5	1	859	0	5	0,001437632	0,004257861	0,351564407	0,171921764	PHC2	Isoform 5 of Polyhomeotic-like protein 2 [OS=Homo sapiens]	Q8IXK0-5
6,550622	6,482445	6,288167	6,434506	6,518365	6,835197	6,684725	6,793614	6,864167	6,848291	FALSK		8	+	CRVO_Control	4	6	4	1	1812	0	4	0,002789281	0,006929334	0,350378036	0,170633798	KIAA1429	protein virilizer homolog [OS=Homo sapiens]	Q69YN4
6,726495	6,522573	6,131705	6,424198	6,42382	6,818943	6,781096	6,809928	6,816198	6,809537	FALSK		1			7	29	6	1	443	1	7	0,019787283	0,032263909	0,361382484	0,172404544	KHDRBS1	KH domain-containing, RNA-binding, signal transduction-associated protein 1 [OS=Homo sapiens]	Q07666
6,690697	6,553053	6,312883	6,247928	6,446256	6,826549	6,89724	6,841722	6,590961	6,860466	FALSK		1			2	3	2	1	81	0	2	0,005270578	0,011156205	0,353224182	0,171133288	CTNNBIP1	beta-catenin-interacting protein 1 [OS=Homo sapiens]	Q9NSA3
5,821195	6,401258	6,186073	6,689859	6,804513	6,708333	6,886096	6,680293	6,854005	6,855084	FALSK		13			2	3	2	1	812	0	2	0,04691454	0,0672921	0,416182327	0,193880313	CHAMP1	Chromosome alignment-maintaining phosphoprotein 1 [OS=Homo sapiens]	Q96JM3
6,559503	6,55658	6,320844	6,424336	6,420397	6,703831	6,850187	6,826187	6,833751	6,815702	FALSK		3			15	33	15	1	709	0	15	0,004677093	0,010219515	0,349599838	0,169600268	APPL1	DCC-interacting protein 13-alpha [OS=Homo sapiens]	Q9UKG1
6,404076	6,49081	6,461604	6,386122	6,53581	6,963458	6,56683	6,71538	6,569468	7,121159	FALSK		1			2	3	2	1	359	0	2	0,031713354	0,048128633	0,331574249	0,157713817	AKR7A2	aflatoxin B1 aldehyde reductase member 2 [OS=Homo sapiens]	O43488
6,688752	6,520463	6,352464	6,264996	6,425297	6,809606	6,878841	6,933526	6,585773	6,796885	FALSK		14			2	6	2	1	81	0	2	0,00873727	0,016628008	0,350531578	0,169074168	NEDD8	NEDD8 [OS=Homo sapiens]	Q15843
6,647263	6,521685	6,229688	6,433498	6,43545	6,795062	6,751518	6,778734	6,805997	6,898962	FALSK		3			6	13	6	1	313	0	6	0,008707115	0,016603961	0,352537918	0,170013483	WDR82	WD repeat-containing protein 82 [OS=Homo sapiens]	Q6UXN9
6,423455	6,581143	6,309722	6,44471	6,52431	6,86519	6,74685	6,801219	6,847256	6,76882	FALSK		19			9	38	9	1	475	0	9	0,004821178	0,010461984	0,349198818	0,169369265	U2AF2	Splicing factor U2AF 65 kDa subunit [OS=Homo sapiens]	P26368
6,82718	6,435462	6,185865	6,368002	6,405983	6,804568	6,799932	6,807947	6,807353	6,813781	FALSK		11			15	52	15	1	504	0	15	0,02665104	0,041577815	0,362217522	0,172013652	API5	Isoform 2 of Apoptosis inhibitor 5 [OS=Homo sapiens]	Q9BZZ5-2
6,550916	6,427083	6,236491	6,543665	6,501473	6,887156	6,819748	6,598397	6,777733	6,912824	FALSK		4	+	CRVO_Control	2	3	2	1	396	0	2	0,000365262	0,001662317	0,347246075	0,170966339	MAEA	Macrophage erythroblast attacher [OS=Homo sapiens]	Q7L5Y9-1
6,576092	6,2794	6,552344	6,479277	6,318867	6,761293	6,919737	6,77154	6,745386	6,793804	FALSK		4			2	5	2	1	217	0	2	0,014719839	0,025364959	0,357156181	0,171143803	GRPEL1	GrpE protein homolog 1, mitochondrial [OS=Homo sapiens]	Q9HAV7
6,760842	6,362458	6,389548	6,154454	6,525197	6,740819	6,686606	6,849626	6,986285	6,709381	FALSK		13			2	4	2	1	1668	0	2	0,067540892	0,092269377	0,35604353	0,166139915	ZC3H13	Zinc finger CCCH domain-containing protein 13 [OS=Homo sapiens]	Q5T200-1
6,644482	6,409878	6,278863	6,452675	6,493134	6,837923	6,737401	6,790838	6,796992	6,859478	FALSK		1	+	CRVO_Control	8	16	8	1	531	0	8	0,00235249	0,006104237	0,348719788	0,170043704	CDC73	Parafibromin [OS=Homo sapiens]	Q6P1J9
6,634963	6,570469	6,261359	6,444524	6,367918	6,775839	6,755054	6,833656	6,844862	6,812452	FALSK		9			4	11	4	1	92	0	4	0,012740843	0,022559802	0,348525906	0,167461382	SNRPE	small nuclear ribonucleoprotein E [OS=Sus scrofa]	A1XQR9
6,715619	6,649615	6,175924	6,485427	6,199672	6,904484	7,005625	6,381976	6,84549	6,812498	FALSK		3			3	3	2	1	912	0	3	0,010564512	0,019301237	0,344763184	0,166064506	ALDH1L1	Isoform 3 of Cytosolic 10-formyltetrahydrofolate dehydrogenase [OS=Homo sapiens]	O75891-3
6,729429	6,577915	6,258958	6,413497	6,21287	6,734395	6,714991	6,864944	6,751003	6,933113	FALSK		5			2	2	2	1	429	0	2	0,055933322	0,078621885	0,361155319	0,16912968	HDAC3	Isoform 2 of Histone deacetylase 3 [OS=Homo sapiens]	O15379-2
6,865931	6,768165	5,73773	6,451662	6,198947	6,881874	6,835978	6,54895	7,005604	6,696158	FALSK					2	5	2	1	1248	0	2	0,06212145	0,085761988	0,389225864	0,180902513		Isoform 4 of Tubulin-specific chaperone D [OS=Homo sapiens]	Q9BTW9-4
6,691532	6,380537	6,236625	6,49478	6,463207	6,791814	6,881715	6,841228	6,720113	6,779832	FALSK		10			3	5	3	1	709	0	3	0,01862714	0,030635786	0,349604225	0,167171247	NOLC1	Isoform Beta of Nucleolar and coiled-body phosphoprotein 1 [OS=Homo sapiens]	Q14978-2
6,66094	6,460106	6,309092	6,449402	6,408332	6,777444	6,821157	6,888113	6,771446	6,761541	FALSK		20			4	8	3	1	225	0	4	0,009189222	0,017340139	0,346365929	0,167050295	SNRPB2	U2 small nuclear ribonucleoprotein B'' [OS=Homo sapiens]	P08579
6,316452	6,701105	6,317024	6,485136	6,458508	6,784918	6,873375	6,751307	6,763526	6,846735	FALSK		22	+	CRVO_Control	7	36	7	1	661	0	7	0,003066418	0,00741377	0,34832716	0,169547449	EWSR1	Isoform 5 of RNA-binding protein EWS [OS=Homo sapiens]	Q01844-5
6,471993	6,543363	6,276243	6,340799	6,615061	6,835005	6,665493	6,851734	6,807991	6,831089	FALSK		12			4	6	3	1	502	1	4	0,013145754	0,023104104	0,348770523	0,167513764	TFCP2	Alpha-globin transcription factor CP2 [OS=Homo sapiens]	Q12800-1
6,546709	6,627895	6,266572	6,402251	6,433678	6,923416	6,806026	6,664937	6,804379	6,805919	FALSK		17	+	CRVO_Control	11	26	8	1	385	0	11	0,001217692	0,003743934	0,345514107	0,169182974	PRPSAP1	Isoform 2 of Phosphoribosyl pyrophosphate synthase-associated protein 1 [OS=Homo sapiens]	Q14558-2
6,521512	6,429814	6,413556	6,457379	6,489691	6,809148	6,725087	6,781789	6,808603	6,888093	FALSK		1	+	CRVO_Control	21	55	10	1	857	11	21	8,99E-05	0,000798469	0,340153408	0,168284236	AGO1;EIF2C1	protein argonaute-1 [OS=Homo sapiens]	Q9UL18
6,410855	6,635564	6,240773	6,361617	6,611431	6,636414	6,670891	6,881904	6,81564	6,97235	FALSK		7			4	5	4	1	1516	0	4	0,028534497	0,044026976	0,343391991	0,163328243	CUX1	Isoform 3 of Homeobox protein cut-like 1 [OS=Homo sapiens]	P39880-3
6,232783	6,636772	6,273218	6,505902	6,610907	6,787538	6,802301	6,840275	6,766667	6,810527	FALSK		7			3	4	3	1	522	0	3	0,016291358	0,027534793	0,349545193	0,167434919	NRF1	Isoform 4 of Nuclear respiratory factor 1 [OS=Homo sapiens]	Q16656-4
6,644401	6,564416	6,182814	6,497426	6,383778	6,76287	6,973903	6,542985	6,879405	6,819229	FALSK		12	+	CRVO_Control	5	7	4	1	923	1	5	0,003941617	0,009007035	0,341111469	0,165822599	ALDH1L2	Mitochondrial 10-formyltetrahydrofolate dehydrogenase [OS=Homo sapiens]	Q3SY69-1
6,490681	6,752639	6,201045	6,366918	6,441965	6,740716	6,895333	6,776822	6,782387	6,808413	FALSK					4	8	3	1	489	0	4	0,008950832	0,01697479	0,350084591	0,168824913		Isoform 2 of Cyclin-dependent kinase 9 [OS=Homo sapiens]	P50750-2
6,480585	6,466203	6,383606	6,502721	6,483772	6,793068	6,683255	6,875722	6,81436	6,840221	FALSK		4	+	CRVO_Control	12	21	9	1	2863	3	12	0,001648563	0,004734623	0,33794775	0,165275133	LRBA	Lipopolysaccharide-responsive and beige-like anchor protein [OS=Homo sapiens]	P50851-1
6,669572	6,170704	6,377845	6,601981	6,363998	6,912204	6,721599	6,73365	6,931488	6,642682	FALSK		19	+	CRVO_Control	5	6	5	1	855	0	5	0,00279237	0,006927928	0,351504421	0,171166709	XAB2	Pre-mRNA-splicing factor SYF1 [OS=Homo sapiens]	Q9HCS7
6,451159	6,626365	6,289995	6,519929	6,414077	6,77071	6,839329	6,796322	6,896029	6,701085	FALSK		12	+	CRVO_Control	5	8	2	1	3996	3	5	0,002283223	0,005985959	0,340390015	0,166112082	HECTD4	Probable E3 ubiquitin-protein ligase HECTD4 [OS=Homo sapiens]	Q9Y4D8-1
5,99301	6,75104	6,41995	6,57891	6,475602	6,77634	6,807857	6,805179	6,828171	6,793113	FALSK		17			10	26	10	1	217	0	10	0,040009915	0,058858203	0,358429718	0,169106896	GRB2	Growth factor receptor-bound protein 2 [OS=Homo sapiens]	P29354-1
6,587653	6,647418	6,191535	6,419525	6,434141	6,795644	6,779473	6,786587	6,806693	6,844215	FALSK		3			2	7	2	1	236	0	2	0,013112515	0,023077783	0,346468067	0,166456062	RABL3	Rab-like protein 3 [OS=Homo sapiens]	Q5HYI8
6,30134	6,49005	6,283503	6,540284	6,653582	6,922412	6,807125	6,754902	6,765474	6,753194	FALSK		16			5	8	5	1	210	0	5	0,019268424	0,031553604	0,346869755	0,16584564	EMC8	ER membrane protein complex subunit 8 [OS=Homo sapiens]	O43402
6,577112	6,599434	6,208293	6,446033	6,452835	6,805858	6,816029	6,703723	6,812643	6,866184	FALSK	Acetyl [N-Term]	1	+	CRVO_Control	6	10	3	1	167	3	6	0,003054752	0,007399722	0,344145775	0,16757	PTP4A2	Protein tyrosine phosphatase type IVA 2 [OS=Homo sapiens]	Q12974
6,316508	6,590961	6,462707	6,457791	6,485427	6,803485	6,761551	6,870365	6,787902	6,787902	FALSK		10	+	CRVO_Control	2	2	2	1	217	0	2	0,003069469	0,007416416	0,339562416	0,165390384	VTI1A	Vesicle transport through interaction with t-SNAREs homolog 1A [OS=Homo sapiens]	Q96AJ9-2
6,611382	6,395988	6,456134	6,530004	6,294105	6,86458	6,782478	6,696947	6,72181	6,930534	FALSK		1			8	14	8	1	993	0	8	0,013163498	0,023113858	0,341747189	0,164268294	EMC1	ER membrane protein complex subunit 1 [OS=Homo sapiens]	Q8N766-1
6,449765	6,668691	6,340569	6,447724	6,39354	6,838542	6,619289	6,84754	6,838741	6,852633	FALSK		22			8	16	8	1	367	0	8	0,027171975	0,042286107	0,339291096	0,161592711	DRG1	developmentally-regulated GTP-binding protein 1 [OS=Homo sapiens]	Q9Y295
6,75714	6,478359	6,272055	6,338952	6,429102	6,797008	6,88258	6,817419	6,716203	6,793115	FALSK		6			10	45	10	1	375	0	10	0,014090828	0,024515066	0,346143436	0,16616646	DEK	Protein DEK [OS=Homo sapiens]	P35659-1
6,568029	6,493007	6,387139	6,491821	6,379303	6,721076	6,882824	6,818048	6,774738	6,807975	FALSK		13	+	CRVO_Control	2	5	2	1	390	0	2	0,003194782	0,007641274	0,337072277	0,16416281	CARKD;NAXD	Isoform 2 of ATP-dependent (S)-NAD(P)H-hydrate dehydratase [OS=Homo sapiens]	Q8IW45-2
6,421886	6,322492	6,568151	6,475422	6,514337	6,884218	6,765535	6,827543	6,765276	6,752701	FALSK		14	+	CRVO_Control	7	23	7	1	338	0	7	0,002029819	0,005512208	0,338597298	0,165380012	AHSA1	activator of 90 kDa heat shock protein ATPase homolog 1 [OS=Homo sapiens]	O95433
6,683696	6,501313	6,256407	6,490996	6,362548	6,802146	6,789908	6,8341	6,814248	6,76688	FALSK		22			3	10	3	1	110	0	3	0,010308298	0,018979485	0,342464542	0,165040157	PHF5A	PHD finger-like domain-containing protein 5A [OS=Homo sapiens]	Q7RTV0
6,404033	6,848584	6,280613	6,405069	6,319096	6,878928	6,809743	6,867151	6,790506	6,649972	FALSK		11			2	4	2	1	418	0	2	0,030394562	0,046499509	0,347781372	0,165145323	CHID1	Isoform 2 of Chitinase domain-containing protein 1 [OS=Homo sapiens]	Q9BWS9-2
6,673839	6,477243	6,250473	6,424195	6,474756	6,843399	6,805969	6,82145	6,770088	6,765431	FALSK		14			10	27	10	1	1341	0	10	0,006367936	0,012868255	0,34116621	0,165198664	ACIN1	Apoptotic chromatin condensation inducer in the nucleus [OS=Homo sapiens]	Q9UKV3-1
6,702315	6,52182	6,353717	6,361233	6,355684	6,844191	6,802314	6,735835	6,832515	6,78759	FALSK		1	+	CRVO_Control	6	11	6	1	1461	0	6	0,004497722	0,009942194	0,341534901	0,165853114	RPRD2	Regulation of nuclear pre-mRNA domain-containing protein 2 [OS=Homo sapiens]	Q5VT52
6,76195	6,40835	6,268629	6,473586	6,369511	6,752198	6,745596	6,784918	6,867894	6,850939	FALSK		15			2	3	2	1	477	0	2	0,021522435	0,034675542	0,343904209	0,16424219	MEIS2	Homeobox protein Meis2 [OS=Homo sapiens]	O14770-1
6,640382	6,609002	6,205525	6,391986	6,437226	6,78101	6,845249	6,761693	6,74669	6,855465	FALSK		12			4	7	4	1	464	0	4	0,009028558	0,017105079	0,341197205	0,16467342	STK38L	serine/threonine-protein kinase 38-like [OS=Homo sapiens]	Q9Y2H1
6,031862	6,4009	6,391063	6,652583	6,703375	6,611292	6,820764	6,780954	6,63057	7,07478	FALSK		X			2	3	2	1	189	0	2	0,025003851	0,039364452	0,347715569	0,165619639	FUNDC2	FUN14 domain-containing protein 2 [OS=Sus scrofa]	Q864V5
6,259725	6,625357	6,350692	6,358541	6,638484	6,797832	6,866123	6,72142	6,756666	6,804009	FALSK		2			4	11	4	1	459	0	4	0,006116934	0,012467363	0,342650604	0,165953459	KIAA1715	Isoform 4 of Protein lunapark [OS=Homo sapiens]	Q9C0E8-4
6,506434	6,515846	6,370228	6,500102	6,404192	6,786113	6,803221	6,753062	6,798505	6,838913	FALSK		7	+	CRVO_Control	9	54	4	1	180	0	9	0,00039465	0,001747804	0,336602306	0,165754288	ARF5	ADP-ribosylation factor 5 [OS=Homo sapiens]	P84085
6,247928	6,553053	6,32373	6,60733	6,571373	6,909293	6,797013	6,912889	6,749534	6,613237	FALSK		9			2	2	2	1	747	0	2	0,052457673	0,074259536	0,335710239	0,158131381	POMT1	Protein O-mannosyl-transferase 1 [OS=Homo sapiens]	Q9Y6A1
6,632262	6,465675	6,374105	6,411893	6,432037	6,844731	6,683696	6,74155	6,87619	6,843577	FALSK		X	+	CRVO_Control	16	28	16	1	913	0	16	0,002817623	0,00697233	0,334754467	0,163203308	WDR44	WD repeat-containing protein 44 [OS=Homo sapiens]	Q5JSH3
6,431784	6,495222	6,286231	6,334454	6,420617	6,719327	6,694486	6,790967	6,715746	6,866415	FALSK		18	+	CRVO_Control	4	5	4	1	559	0	4	0,00265071	0,006663688	0,363726616	0,177024204	GALNT1	Polypeptide N-acetylgalactosaminyltransferase 1 [OS=Homo sapiens]	Q10472
6,703209	6,694078	6,113338	6,247208	6,48691	6,875821	6,741465	6,736739	6,821736	6,815725	FALSK		19			3	18	3	1	105	0	3	0,035078708	0,052335058	0,34934864	0,165450382	RPL36	60S ribosomal protein L36 [OS=Homo sapiens]	Q9Y3U8
6,36264	6,517152	6,417589	6,368053	6,656623	6,922712	6,809651	6,810169	6,795504	6,644733	FALSK		6;CHR_HSCHR6_MHC_COX_CTG1;CHR_HSCHR6_MHC_DBB_CTG1;CHR_HSCHR6_MHC_MANN_CTG1;CHR_HSCHR6_MHC_MCF_CTG1;CHR_HSCHR6_MHC_QBL_CTG1;CHR_HSCHR6_MHC_SSTO_CTG1			7	45	6	1	285	1	7	0,025887834	0,040604376	0,332142544	0,158459097	DDAH2	N(G),N(G)-dimethylarginine dimethylaminohydrolase 2 [OS=Homo sapiens]	O95865
6,622369	6,561285	6,337909	6,430301	6,366942	6,783809	6,784334	6,78452	6,818231	6,824538	FALSK		22			29	93	15	1	949	0	29	0,005148505	0,010940573	0,335325336	0,16274831	AP1B1	AP-1 complex subunit beta-1 [OS=Homo sapiens]	Q10567
6,62195	6,410183	6,289809	6,471916	6,526335	6,743206	6,79765	6,745863	6,797083	6,904875	FALSK		10	+	CRVO_Control	9	20	9	1	328	0	9	0,004259363	0,009492795	0,333696651	0,16222155	BUB3	Mitotic checkpoint protein BUB3 [OS=Homo sapiens]	O43684
6,554546	6,837311	6,125978	6,187403	6,520401	6,841291	6,806008	6,769498	6,743469	6,833436	FALSK		6			4	13	4	1	222	0	4	0,040248447	0,059186137	0,353612709	0,166942077	GSTA4	Glutathione S-transferase A4 [OS=Homo sapiens]	O15217
6,185183	6,509439	6,342505	6,603055	6,579873	6,623578	6,701859	6,654184	7,088716	6,837908	FALSK		22	+	CRVO_Control	6	8	5	1	639	1	6	0,003548364	0,00829337	0,337238026	0,164118424	GGA1	ADP-ribosylation factor-binding protein GGA1 [OS=Homo sapiens]	Q9UJY5-1
6,600647	6,52038	6,339365	6,441541	6,433753	6,78461	6,749534	6,856693	6,783828	6,818576	FALSK		2			18	59	18	1	579	0	18	0,004946412	0,010642366	0,331511021	0,161002071	LOC100520121;DAK;TKFC	Triokinase/FMN cyclase [OS=Sus scrofa]	F1RKQ4
6,471301	6,512875	6,350341	6,483664	6,522419	6,809278	6,774777	6,819367	6,817894	6,772147	FALSK		19	+	CRVO_Control	25	141	25	1	730	0	25	0,001066495	0,003389004	0,330572987	0,162121543	HNRNPM	Heterogeneous nuclear ribonucleoprotein M [OS=Homo sapiens]	P52272
6,627622	6,379365	6,207222	6,640455	6,432113	6,910957	6,666102	6,870611	6,837651	6,679677	FALSK		17			2	3	2	1	306	0	2	0,015873403	0,026984785	0,335644245	0,161095749	C17H20orf43;RTFDC1	protein RTF2 homolog [OS=Sus scrofa]	A5GFW7
6,593668	6,640236	6,283864	6,430342	6,366115	6,785479	6,755551	6,831253	6,824802	6,786735	FALSK		1			6	13	6	1	409	0	6	0,013388482	0,023432934	0,333919144	0,160617369	SNRNP40	Isoform 2 of U5 small nuclear ribonucleoprotein 40 kDa protein [OS=Homo sapiens]	Q96DI7-2
6,594682	6,751616	6,21139	6,390266	6,340738	6,574353	6,891089	6,741108	6,8622	6,894732	FALSK		1			3	9	3	1	411	0	3	0,044670411	0,064611038	0,334957886	0,158297778	BROX	BRO1 domain-containing protein BROX [OS=Homo sapiens]	Q5VW32
6,65351	6,552609	6,315329	6,431861	6,374075	6,732701	6,775438	6,82199	6,815441	6,841614	FALSK		17			7	24	7	1	423	0	7	0,014147708	0,024580184	0,331960011	0,159611328	COPS3	COP9 signalosome complex subunit 3 [OS=Homo sapiens]	Q9UNS2
6,809052	6,37235	6,198462	6,433446	6,453072	6,775626	6,755668	6,789198	6,743763	6,907832	FALSK		1			3	5	3	1	316	0	3	0,030912204	0,047120292	0,341141129	0,162103901	GTF2B	Transcription initiation factor IIB [OS=Homo sapiens]	Q00403
7,555662	6,08515	5,99162	5,940756	5,964063	6,746122	7,002641	6,620626	6,774034	6,818048	FALSK		1			5	19	3	1	144	2	5	0,212511305	0,252153476	0,484844112	0,208338855	SOD2	Superoxide dismutase [Mn], mitochondrial [OS=Sus scrofa]	P28768
6,583459	6,904484	6,040016	6,309249	6,3733	6,480588	6,629356	7,103288	6,922436	6,770829	FALSK		5;CHR_HSCHR5_1_CTG1_1;CHR_HSCHR5_2_CTG1_1			2	3	2	1	395	0	2	0,234355196	0,275314703	0,339197922	0,151262643	GTF2H2;GTF2H2C	General transcription factor IIH subunit 2 [OS=Homo sapiens]	Q13888-1
6,71053	6,433792	6,264928	6,451984	6,455982	6,79775	6,785601	6,780018	6,821782	6,801122	FALSK		5			14	26	14	1	1098	0	14	0,008443821	0,01622429	0,333810997	0,16133373	TCERG1	Transcription elongation regulator 1 [OS=Homo sapiens]	O14776-1
6,087457	6,710107	6,363665	6,562084	6,554943	6,813136	6,769711	6,750107	6,80538	6,848242	FALSK		10			6	16	6	1	392	0	6	0,035796505	0,053322024	0,341664028	0,161942728	SEPHS1	Selenide, water dikinase 1 [OS=Homo sapiens]	P49903-1
6,537607	6,839204	6,569856	6,257388	6,020146	6,462707	6,818902	6,616181	7,020146	6,993221	FALSK					6	12	2	1	758	0	6	0,19984774	0,238471131	0,337391376	0,151980593		Isoform 2 of Ribosomal protein S6 kinase alpha-2 [OS=Homo sapiens]	Q15349-2
6,638473	6,487152	6,322309	6,465158	6,421798	6,769641	6,787844	6,792706	6,791639	6,837545	FALSK		19			7	16	7	1	567	0	7	0,004794011	0,01040899	0,328897285	0,159807891	RANBP3	Ran-binding protein 3 [OS=Homo sapiens]	Q9H6Z4
6,556843	6,561455	6,365491	6,407785	6,454512	6,732434	6,82303	6,820644	6,8359	6,771259	FALSK		10;12	+	CRVO_Control	14	211	10	1	254	5	14	0,003236848	0,007717542	0,327436161	0,159573885	PGAM1;LOC643576	Phosphoglycerate mutase 1 [OS=Homo sapiens]	P18669
6,677025	6,454411	6,259212	6,515545	6,416163	6,728402	6,805224	6,777419	6,781331	6,886058	FALSK		17			4	12	4	1	342	0	4	0,016138419	0,027373937	0,331215477	0,159022863	DCAF7	DDB1- and CUL4-associated factor 7 [OS=Homo sapiens]	P61962
6,551377	6,548791	6,387959	6,446256	6,4169	6,795012	6,778662	6,797661	6,82515	6,789612	FALSK		17	+	CRVO_Control	60	195	44	1	2007	6	60	0,000945357	0,003105586	0,326962852	0,160478822	MYH10	Isoform 4 of Myosin-10 [OS=Homo sapiens]	P35580-4
6,840177	6,549848	6,111611	6,348202	6,397642	6,854794	6,827028	6,749394	6,842781	6,703791	FALSK		X			3	8	3	1	265	0	3	0,030652714	0,046856629	0,346061611	0,164346975	PQBP1	Polyglutamine-binding protein 1 [OS=Homo sapiens]	O60828
6,578736	6,620584	6,300124	6,419538	6,417837	6,872956	6,759459	6,739416	6,853582	6,755321	FALSK		20	+	CRVO_Control	8	29	8	1	372	0	8	0,003950632	0,009022196	0,328783321	0,159987377	NSFL1C	Isoform 3 of NSFL1 cofactor p47 [OS=Homo sapiens]	Q9UNZ2-5
6,789661	6,432037	6,246023	6,533687	6,289067	6,998844	6,666739	6,793766	6,8488	6,648534	FALSK		1			2	4	2	1	237	0	2	0,005159786	0,010958402	0,333241558	0,161763571	LYPLAL1	Lysophospholipase-like protein 1 [OS=Homo sapiens]	Q5VWZ2
6,556586	6,338897	6,560279	6,380901	6,504704	6,770654	6,710802	6,822702	6,720415	6,94508	FALSK		11	+	CRVO_Control	3	5	3	1	745	0	3	0,001234182	0,003770172	0,325657082	0,159638669	GRAMD1B	Isoform 4 of GRAM domain-containing protein 1B [OS=Homo sapiens]	Q3KR37-4
6,550939	6,730663	6,170053	6,430635	6,374125	6,842098	6,68908	6,605561	7,049181	6,735566	FALSK		12			2	2	2	1	126	0	2	0,037194811	0,05512335	0,333014107	0,157947997	C12orf57	Protein C10 [OS=Homo sapiens]	Q99622
6,500505	6,562917	6,365761	6,455072	6,46535	6,84269	6,721783	6,775352	6,79894	6,842913	FALSK		1	+	CRVO_Control	5	8	5	1	650	0	5	0,001714308	0,004886422	0,326414204	0,159718781	FAF1	fas-associated factor 1 [OS=Homo sapiens]	Q9UNN5-1
6,057894	6,423873	6,587759	6,662377	6,416552	6,689147	6,988412	6,890754	6,750381	6,604708	FALSK		17			2	3	2	1	620	0	2	0,028069072	0,043414872	0,354989243	0,168611449	C17orf85;NCBP3	Nuclear cap-binding protein subunit 3 [OS=Homo sapiens]	Q53F19
6,599913	5,84549	6,778734	6,65392	6,307428	6,880196	6,834155	6,789207	6,61471	6,849249	FALSK		8			2	3	2	1	293	0	2	0,132739211	0,166903599	0,356406403	0,162800417	MSMO1	Methylsterol monooxygenase 1 [OS=Sus scrofa]	Q6UGB2
6,576973	6,596147	6,27951	6,462439	6,423873	6,79532	6,793495	6,797483	6,799932	6,793282	FALSK		16			24	81	24	1	796	0	24	0,004774012	0,010377455	0,328114128	0,159443245	VPS35	Vacuolar protein sorting-associated protein 35 [OS=Homo sapiens]	Q96QK1
6,740095	6,419476	6,399	6,384567	6,389524	6,755551	6,778069	6,725873	6,834146	6,881401	FALSK		5			17	626	11	1	333	10	17	0,017212262	0,028732578	0,328475857	0,157637432	GAPDH	glyceraldehyde-3-phosphate dehydrogenase [OS=Sus scrofa]	P00355
6,500564	6,402973	6,324884	6,520414	6,603626	6,862775	6,717663	6,799212	6,80856	6,787248	FALSK		X	+	CRVO_Control	12	21	12	1	2492	0	12	0,002399544	0,006196643	0,324599552	0,158534165	ATRX	transcriptional regulator ATRX [OS=Homo sapiens]	P46100
6,141272	6,630048	6,425793	6,64656	6,462216	6,741426	6,738036	6,938186	6,983409	6,5289	FALSK		1			5	9	5	1	226	0	5	0,037518356	0,055537715	0,324813843	0,154231426	RAB32	Ras-related protein Rab-32 [OS=Sus scrofa]	Q06AU5
6,7575	6,232629	6,243455	6,328943	6,457949	6,671165	6,772202	6,682146	6,649273	7,043688	FALSK		19			2	3	2	1	312	0	2	0,04052318	0,059543945	0,359599972	0,169586298	GIPC3	PDZ domain-containing protein GIPC3 [OS=Homo sapiens]	Q8TF64
6,830814	6,382871	6,282204	6,399021	6,36862	6,843756	6,762152	6,770832	6,749266	6,82867	FALSK		10			5	9	5	1	576	0	5	0,01652605	0,027782819	0,338229275	0,162206531	MPP7	MAGUK p55 subfamily member 7 [OS=Homo sapiens]	Q5T2T1
6,764475	6,487991	6,187078	6,392563	6,47648	6,732293	6,828196	6,839096	6,783718	6,788282	FALSK		1			7	24	6	1	494	1	7	0,038309384	0,056642306	0,33259964	0,157681061	SRSF4	Serine/arginine-rich splicing factor 4 [OS=Homo sapiens]	Q08170
5,824884	7,269062	6,116162	6,079423	6,403879	6,642328	6,961366	6,412642	7,069339	6,74125	FALSK		11			2	6	2	1	335	0	2	0,133823556	0,168044088	0,426703167	0,19157052	B3GAT3	Galactosylgalactosylxylosylprotein 3-beta-glucuronosyltransferase 3 [OS=Homo sapiens]	O94766
6,588881	6,559989	6,181643	6,52976	6,420453	7,031762	6,67232	6,630107	6,755184	6,810156	FALSK		7			2	2	2	1	246	0	2	0,00823076	0,015871215	0,323760509	0,156670487	TMUB1	transmembrane and ubiquitin-like domain-containing protein 1 [OS=Homo sapiens]	Q9BVT8
6,724058	6,428096	6,295384	6,4733	6,416116	6,833449	6,698175	6,821399	6,801539	6,816069	FALSK		19			5	9	5	1	464	0	5	0,009119103	0,017242154	0,326735497	0,157911138	SF3A2	splicing factor 3a subunit 2 [OS=Homo sapiens]	Q15428
6,533204	6,461011	6,409135	6,476542	6,476112	6,91703	6,891777	6,798025	6,73621	6,601521	FALSK		5			3	4	3	1	202	0	3	0,004740972	0,010335264	0,31771183	0,154534195	COMMD10	COMM domain-containing protein 10 [OS=Homo sapiens]	Q9Y6G5
6,480357	6,683694	6,362803	6,405591	6,419342	6,787689	6,711446	6,812944	6,855438	6,8016	FALSK		19			25	69	19	1	2036	0	25	0,014592899	0,0251691	0,32346611	0,155626286	MYH14	Isoform 2 of Myosin-14 [OS=Homo sapiens]	Q7Z406-2
6,646915	6,446935	6,203485	6,51686	6,525129	6,757989	6,738661	6,811805	6,862945	6,798663	FALSK		9			4	5	3	1	1096	1	4	0,015580632	0,026606385	0,326147556	0,156749459	PHF2	lysine-specific demethylase phf2 [OS=Homo sapiens]	O75151
6,590387	6,594299	6,263323	6,440261	6,441517	6,753701	6,824916	6,758856	6,769594	6,851836	FALSK		13			4	8	4	1	249	0	4	0,005498749	0,011536113	0,325823021	0,15818489	GTF2F2	General transcription factor IIF subunit 2 [OS=Homo sapiens]	P13984
6,545298	6,559951	6,342519	6,456867	6,464318	6,816233	6,758127	6,794406	6,807327	6,792904	FALSK		X	+	CRVO_Control	39	81	39	1	1233	0	39	0,001624205	0,004675295	0,32000885	0,15669685	SMC1A	structural maintenance of chromosomes protein 1a [OS=Homo sapiens]	Q14683
5,993348	6,177125	6,792651	6,611147	6,585348	6,955821	6,719017	6,852653	6,767589	6,634642	FALSK		7			6	9	6	1	373	0	6	0,11552388	0,147856526	0,354020596	0,16264736	CEP41	centrosomal protein of 41 kDa [OS=Homo sapiens]	Q9BYV8
6,624833	6,59952	6,289658	6,442897	6,397411	6,771908	6,79563	6,788555	6,800879	6,811567	FALSK		2			21	51	21	1	1134	0	21	0,008158916	0,015780842	0,322844219	0,156253804	NCKAP1	Isoform 2 of Nck-associated protein 1 [OS=Homo sapiens]	Q9Y2A7-2
6,563749	6,372307	6,546506	6,346717	6,511087	6,828012	6,588455	6,919405	6,921352	6,661281	FALSK		20			8	11	8	1	1102	0	8	0,01315018	0,023101174	0,31562767	0,152164559	ADNP	Activity-dependent neuroprotector homeobox protein [OS=Homo sapiens]	Q9H2P0
6,712122	6,470043	6,235469	6,439731	6,48282	6,834049	6,819143	6,788589	6,836503	6,675881	FALSK		16			9	17	9	1	1097	0	9	0,013355572	0,023396938	0,322796249	0,155468049	ATXN2L	Isoform 3 of Ataxin-2-like protein [OS=Homo sapiens]	Q8WWM7-3
6,760842	6,542922	6,240188	6,389578	6,399841	6,772791	6,82781	6,778034	6,747667	6,835325	FALSK		19			6	23	5	1	353	0	6	0,021553706	0,034681707	0,325651169	0,155892894	ELAVL1	Isoform 2 of ELAV-like protein 1 [OS=Homo sapiens]	Q15717-2
6,31278	6,504599	6,451188	6,537335	6,558925	6,78452	6,789981	6,825696	6,742774	6,815907	FALSK		3	+	CRVO_Control	4	8	4	1	178	0	4	0,00247659	0,006322393	0,318810368	0,155741011	PCNP	PEST proteolytic signal-containing nuclear protein [OS=Homo sapiens]	Q8WW12
5,760022	6,826321	6,73791	6,139805	6,554419	6,650044	6,867132	6,725832	6,67616	6,881269	FALSK		1			3	4	3	1	773	0	3	0,098804679	0,128717711	0,356392002	0,164513398	KIRREL	Isoform 2 of Kin of IRRE-like protein 1 [OS=Homo sapiens]	Q96J84-2
6,761702	6,520414	6,612152	6,252479	6,103507	6,77942	6,601477	7,006282	6,746284	6,782542	FALSK		10			2	3	2	1	898	0	2	0,056013287	0,078675943	0,333150196	0,156780842	C10orf118;CCDC186	Coiled-coil domain-containing protein 186 [OS=Homo sapiens]	Q7Z3E2
6,557983	6,254322	6,042698	6,575161	6,547649	6,899541	6,66106	6,77084	6,749072	6,747782	FALSK		22			3	4	3	1	1833	0	3	0,020436272	0,033179403	0,370096111	0,176284018	TNRC6B	Trinucleotide repeat-containing gene 6B protein [OS=Homo sapiens]	Q9UPQ9
6,892982	6,518836	6,14957	6,373927	6,341274	6,958658	6,807341	6,623837	6,801739	6,746902	FALSK		11			10	26	10	1	400	0	10	0,010575701	0,019312371	0,332377529	0,160307931	PPME1	Isoform 4 of Protein phosphatase methylesterase 1 [OS=Homo sapiens]	Q9Y570-4
6,455938	6,61477	6,368691	6,517857	6,417008	6,869006	6,785461	6,740508	6,751674	6,804735	FALSK			+	CRVO_Control	4	5	4	1	1309	0	4	0,002716084	0,006809971	0,315424061	0,154036506		Isoform 2 of DENN domain-containing protein 5B [OS=Homo sapiens]	Q6ZUT9-2
6,786391	6,491049	6,277865	6,381103	6,389695	6,744503	6,786652	6,814364	6,84401	6,764089	FALSK		19			9	15	6	1	1362	3	9	0,031625902	0,048034372	0,325503063	0,154970893	BRD4	Bromodomain-containing protein 4 [OS=Homo sapiens]	O60885-1
6,620262	6,509357	6,273568	6,479054	6,474257	6,689933	6,360432	6,983752	6,741041	7,009161	FALSK		11			2	2	2	1	2214	0	2	0,138574206	0,173092196	0,285564137	0,132533023	SORL1	Sortilin-related receptor [OS=Homo sapiens]	Q92673
6,153879	6,832784	6,284927	6,40699	6,488005	6,910029	6,774508	6,692508	6,696428	6,812626	FALSK		6			2	3	2	1	87	0	2	0,057510863	0,080332971	0,343902779	0,161440845	SEPW1	selenoprotein w [OS=Sus scrofa]	Q95KL4
6,920031	6,388704	6,277229	6,356595	6,345386	6,752559	6,831388	6,746624	6,766858	6,857037	FALSK					6	10	6	1	1269	0	6	0,057630965	0,080411847	0,333304119	0,156753711		Isoform 4 of Double-stranded RNA-specific adenosine deaminase [OS=Homo sapiens]	P55265-4
6,784334	6,494664	6,270105	6,375345	6,410561	6,798579	6,787472	6,833995	6,703902	6,830894	FALSK		3			7	18	7	1	271	0	7	0,023164903	0,036882884	0,323966599	0,154971604	SRPRB	signal recognition particle receptor subunit beta [OS=Homo sapiens]	Q9Y5M8
6,73955	6,349281	6,334686	6,417817	6,509934	6,709033	6,834236	6,719715	6,884382	6,795656	FALSK		10			3	6	3	1	326	0	3	0,027668342	0,042882536	0,318350792	0,152025672	BMI1;COMMD3-BMI1	Polycomb complex protein BMI-1 [OS=Homo sapiens]	P35226
6,690569	6,574471	6,344125	6,382361	6,354154	6,814052	6,925257	6,689057	6,769834	6,744452	FALSK		X	+	CRVO_Control	3	4	3	1	260	0	3	0,00304619	0,007393154	0,319394684	0,155814422	PCSK1N	ProSAAS [OS=Homo sapiens]	Q9UHG2
6,738717	6,518053	6,240212	6,416155	6,437116	6,752874	6,783966	6,81954	6,771488	6,828711	FALSK		20			18	46	18	1	765	0	18	0,025265295	0,039743043	0,321265411	0,153552571	TOP1	DNA topoisomerase 1 [OS=Homo sapiens]	P11387
6,599665	6,494984	6,40666	6,423658	6,461805	6,807353	6,765989	6,794158	6,781357	6,807992	FALSK		20	+	CRVO_Control	11	38	10	1	391	1	11	0,000664008	0,002480055	0,314015388	0,154475389	CSNK2A1	Casein kinase II subunit alpha [OS=Homo sapiens]	P68400
6,64535	6,573279	6,329958	6,460232	6,361014	6,722587	6,840977	6,768135	6,822702	6,798946	FALSK		5			8	16	8	1	467	0	8	0,00939455	0,017666042	0,316702747	0,153176908	DCTN4	Isoform 3 of Dynactin subunit 4 [OS=Homo sapiens]	Q9UJW0-3
6,483376	6,662389	6,319797	6,500431	6,403758	6,785427	6,783979	6,793116	6,814857	6,777444	FALSK		19			5	22	5	1	313	0	5	0,005273053	0,011148994	0,317014694	0,154079611	SGTA	Small glutamine-rich tetratricopeptide repeat-containing protein alpha [OS=Homo sapiens]	O43765
6,571859	6,682792	6,311728	6,449673	6,341655	6,671718	6,8697	6,752186	6,799242	6,851701	FALSK		21			4	6	4	1	763	0	4	0,014399349	0,024948781	0,317367935	0,152823559	DYRK1A	dual specificity tyrosine-phosphorylation-regulated kinase 1A [OS=Homo sapiens]	Q13627-1
6,81564	6,48011	6,165507	6,432796	6,428779	6,795669	6,790379	6,915814	6,865424	6,562276	FALSK		2			2	3	2	1	754	0	2	0,071587816	0,097341969	0,321345997	0,15072757	PPIG	peptidyl-prolyl cis-trans isomerase g [OS=Homo sapiens]	Q13427
6,604926	6,481016	6,354814	6,501088	6,443513	6,837955	6,742799	6,794152	6,807995	6,769371	FALSK	Acetyl [N-Term]	17	+	CRVO_Control	16	38	14	1	1321	2	16	0,00090724	0,003009052	0,313383198	0,153960071	SPAG9	C-jun-amino-terminal kinase-interacting protein 4 [OS=Homo sapiens]	O60271
6,624967	6,675052	6,211401	6,502526	6,330164	6,825881	6,842608	6,76079	6,820948	6,699686	FALSK		6			17	27	17	1	8797	0	17	0,009152943	0,017280283	0,321160698	0,155299929	SYNE1	Nesprin-1 [OS=Homo sapiens]	Q8NF91
5,760221	7,019035	6,171927	6,068241	6,946029	6,311067	7,16088	6,998872	6,487036	6,827819	FALSK		1			2	2	2	1	1877	0	2	0,08984188	0,11838393	0,364044285	0,168272714	NAV1	neuron navigator 1 [OS=Homo sapiens]	Q8NEY1
6,782656	6,520775	6,158141	6,4379	6,427901	6,758535	6,803986	6,819648	6,804771	6,764266	FALSK		2			5	38	4	1	238	1	5	0,041044506	0,060170039	0,324766731	0,153971961	SRSF7	serine/arginine-rich splicing factor 7 [OS=Homo sapiens]	Q16629
6,717402	6,57546	6,233905	6,413751	6,414272	6,782618	6,832129	6,77718	6,8002	6,754367	FALSK		1			6	9	6	1	1410	0	6	0,015479056	0,026492597	0,318340683	0,15315092	POGZ	Pogo transposable element with ZNF domain [OS=Homo sapiens]	Q7Z3K3-1
6,480966	6,530576	6,314473	6,464435	6,594082	6,912102	6,786549	6,788116	6,725031	6,728184	FALSK		19			3	5	3	1	73	0	3	0,007546185	0,014730992	0,311089897	0,15084254	UBL5	ubiquitin-like protein 5 [OS=Homo sapiens]	Q9BZL1
6,556547	6,487004	6,380901	6,497212	6,475209	6,797119	6,810199	6,792946	6,783283	6,765525	FALSK		3	+	CRVO_Control	12	37	11	1	523	1	12	0,000409169	0,001797404	0,310439777	0,153031053	DYNC1LI1	Cytoplasmic dynein 1 light intermediate chain 1 [OS=Homo sapiens]	Q9Y6G9
6,32798	6,637838	6,320095	6,575156	6,515421	6,75595	6,727843	6,911092	6,807225	6,740095	FALSK		1			4	23	4	1	158	0	4	0,023545724	0,03737933	0,313143063	0,14997888	BTF3L4	transcription factor BTF3 homolog 4 [OS=Homo sapiens]	Q96K17-1
6,545972	6,591089	6,33805	6,508648	6,399821	6,812112	6,779962	6,799568	6,78174	6,772702	FALSK		3	+	CRVO_Control	7	23	7	1	368	0	7	0,002730735	0,006819641	0,312500668	0,152636743	SEC13	Isoform 3 of Protein SEC13 homolog [OS=Homo sapiens]	P55735-3
6,665266	6,476525	6,352477	6,491714	6,397132	6,767482	6,789414	6,795656	6,766417	6,828352	FALSK		16			21	73	21	1	1217	0	21	0,007242157	0,014262347	0,312841129	0,151719132	SF3B3	Splicing factor 3B subunit 3 [OS=Homo sapiens]	Q15393-1
6,461805	6,70389	6,351988	6,42624	6,437925	6,766179	6,94716	6,613931	6,851065	6,749484	FALSK		7	+	CRVO_Control	7	36	7	1	493	0	7	0,000611791	0,002345098	0,309194183	0,152192054	FSCN1	Fascin [OS=Homo sapiens]	Q16658
6,710402	6,331488	6,32378	6,722524	6,196366	6,962132	6,842872	6,543059	6,741585	6,820755	FALSK		15			3	5	3	1	1433	0	3	0,039829054	0,058614885	0,325168514	0,154233598	PPIP5K1	Inositol hexakisphosphate and diphosphoinositol-pentakisphosphate kinase 1 [OS=Homo sapiens]	Q6PFW1-1
6,758372	6,476493	6,227505	6,507572	6,382772	6,749767	6,776166	6,728304	6,799117	6,886869	FALSK		22			5	16	5	1	128	0	5	0,027607263	0,042822887	0,317502022	0,151643309	NHP2L1;SNU13	NHP2-like protein 1 [OS=Homo sapiens]	P55769
6,655306	6,512397	6,287013	6,469625	6,459319	6,75676	6,760886	6,835934	6,773568	6,815648	FALSK		12			7	25	7	1	588	0	7	0,012922211	0,022817002	0,311827278	0,150424567	CPSF6	Isoform 2 of Cleavage and polyadenylation specificity factor subunit 6 [OS=Homo sapiens]	Q16630-2
6,765485	6,505147	6,274411	6,388032	6,423455	6,779389	6,800817	6,800885	6,787865	6,776916	FALSK		3			5	11	5	1	167	0	5	0,020102348	0,03272134	0,317868042	0,1524571	CGGBP1	CGG triplet repeat-binding protein 1 [OS=Homo sapiens]	Q9UFW8
6,561075	6,570123	6,325593	6,470627	6,462614	6,810339	6,777746	6,718988	6,851871	6,780434	FALSK		2	+	CRVO_Control	3	6	3	1	418	0	3	0,001026638	0,003315148	0,309869003	0,152177339	SMYD5	SET and MYND domain-containing protein 5 [OS=Homo sapiens]	Q6GMV2
6,529434	6,363288	6,33919	6,514575	6,535292	6,91193	6,637047	6,643164	6,81335	6,865836	FALSK		11	+	CRVO_Control	3	5	3	1	487	0	3	6,72E-05	0,000707591	0,317909527	0,157498371	PTDSS2	phosphatidylserine synthase 2 [OS=Homo sapiens]	Q9BVG9
6,538457	6,559105	6,32351	6,526246	6,453663	6,783975	6,830904	6,758712	6,768179	6,800113	FALSK		19	+	CRVO_Control	9	22	9	1	346	0	9	0,001124098	0,003524777	0,308180237	0,151298368	SAE1	SUMO-activating enzyme subunit 1 [OS=Homo sapiens]	Q9UBE0-1
6,670302	6,504337	6,373979	6,486167	6,361931	6,768097	6,810565	6,799558	6,774121	6,786587	FALSK		1			8	30	8	1	228	0	8	0,006791967	0,013452638	0,308442211	0,149728508	CACYBP	Calcyclin-binding protein [OS=Homo sapiens]	Q9HB71
6,536045	6,66165	6,453682	6,393173	6,356665	6,729948	6,660755	6,983514	6,813684	6,72587	FALSK		6			7	19	7	1	329	0	7	0,031547872	0,047935063	0,30251112	0,144517687	LOC733653;CRYZ	Quinone oxidoreductase [OS=Sus scrofa]	Q0MVN8
6,471148	6,250799	6,696004	6,560702	6,399641	6,932439	6,687748	6,791052	6,810509	6,697532	FALSK		21			7	17	2	1	277	5	7	0,009873477	0,018384259	0,308197021	0,149125584	CBR1;SETD4	Carbonyl reductase [NADPH] 1 [OS=Homo sapiens]	P16152
6,639475	6,544159	6,285776	6,445423	6,483838	6,827817	6,841049	6,720113	6,74608	6,794357	FALSK		7	+	CRVO_Control	16	28	16	1	1483	0	16	0,001424917	0,004233432	0,306149197	0,150145527	BAZ1B	Tyrosine-protein kinase BAZ1B [OS=Homo sapiens]	Q9UIG0
6,662332	6,619597	6,222617	6,510282	6,362803	6,733439	6,848593	6,713486	6,789847	6,843223	FALSK		15			6	14	6	1	633	0	6	0,017494265	0,029100815	0,310191345	0,149168369	CLPX	ATP-dependent Clp protease ATP-binding subunit clpX-like, mitochondrial [OS=Homo sapiens]	O76031
6,764443	6,497426	6,260189	6,436294	6,417837	6,789198	6,809268	6,742095	6,78526	6,805969	FALSK		X			19	46	19	1	2079	0	19	0,015587794	0,026594657	0,311120319	0,149794134	HCFC1	Isoform 4 of Host cell factor 1 [OS=Homo sapiens]	P51610-4
6,625138	6,734005	6,255489	6,450005	6,269099	6,913554	6,791755	6,692231	6,90802	6,576818	FALSK		1			5	7	5	1	802	0	5	0,012296174	0,021905449	0,309728241	0,149523176	RSBN1	Round spermatid basic protein 1 [OS=Homo sapiens]	Q5VWQ0
5,789555	6,934004	6,419838	6,415016	6,590778	6,956134	6,601605	6,586045	6,892244	6,803148	FALSK		11			4	5	4	1	1263	0	4	0,239845683	0,281068001	0,337997246	0,150554487	SIK3	Serine/threonine-protein kinase SIK3 [OS=Homo sapiens]	Q9Y2K2
6,778658	6,568777	6,229964	6,378229	6,398182	6,705501	6,782858	6,820506	6,866618	6,73869	FALSK		1			3	11	3	1	312	0	3	0,054167857	0,076452102	0,312072563	0,147507502	PRPF38A	Pre-mRNA-splicing factor 38A [OS=Homo sapiens]	Q8NAV1-1
6,275157	6,430168	6,402882	6,638015	6,646531	6,900932	6,714924	6,772319	6,840243	6,686005	FALSK		1			3	9	3	1	348	0	3	0,035029083	0,052281595	0,304334068	0,145122204	GALE	UDP-glucose 4-epimerase [OS=Homo sapiens]	Q14376
6,485427	6,534497	6,431289	6,504621	6,475733	6,835419	6,686501	6,815063	6,76686	6,820179	FALSK		1	+	CRVO_Control	3	3	3	1	1548	0	3	0,002019464	0,005488021	0,298490906	0,146195849	ZMYM4	Zinc finger MYM-type protein 4 [OS=Homo sapiens]	Q5VZL5
6,617352	6,532798	6,394009	6,503342	6,367118	6,760315	6,791162	6,792324	6,779732	6,803694	FALSK		22	+	CRVO_Control	16	49	16	1	793	0	16	0,004517107	0,009979226	0,302521706	0,147387939	SF3A1	splicing factor 3A subunit 1 [OS=Homo sapiens]	Q15459
6,909878	6,539039	6,125035	6,361062	6,375906	6,846622	6,801961	6,82972	6,772802	6,669509	FALSK		22			3	6	3	1	421	0	3	0,060203137	0,083570154	0,321938801	0,151576267	POLDIP3	Polymerase delta-interacting protein 3 [OS=Homo sapiens]	Q9BY77
6,388236	6,500495	6,455743	6,53615	6,539118	6,832704	6,805812	6,694681	6,727812	6,856116	FALSK		12	+	CRVO_Control	7	17	7	1	225	0	7	0,002197269	0,005833227	0,299476528	0,146600349	RAB21	Ras-related protein Rab-21 [OS=Homo sapiens]	Q9UL25
6,678137	6,546895	6,313479	6,437822	6,429367	6,781044	6,803372	6,759548	6,771304	6,810482	FALSK		12			7	25	7	1	186	0	7	0,006744937	0,013394476	0,304010105	0,147647081	VPS29	Isoform 2 of Vacuolar protein sorting-associated protein 29 [OS=Homo sapiens]	Q9UBQ0-2
6,572301	6,451649	6,244964	6,403637	6,652876	6,822976	6,79049	6,855954	6,71507	6,692577	FALSK		7			3	4	3	1	634	0	3	0,02763529	0,042848828	0,310328102	0,148364931	ABCF2	Isoform 2 of ATP-binding cassette sub-family F member 2 [OS=Homo sapiens]	Q9UG63-2
6,562993	6,659233	6,203925	6,534053	6,420152	6,845576	6,705787	6,73943	6,838573	6,792464	FALSK		22;CHR_HSCHR22_1_CTG7			7	16	7	1	385	0	7	0,017524948	0,029139069	0,308294868	0,148288026	SMARCB1	SWI/SNF-related matrix-associated actin-dependent regulator of chromatin subfamily B member 1 [OS=Homo sapiens]	Q12824-1
6,606886	6,549026	6,457788	6,369317	6,424886	6,847331	6,829278	6,73808	6,646948	6,847685	FALSK		7	+	CRVO_Control	3	4	3	1	3859	0	3	0,000680109	0,002517864	0,300283527	0,147810252	TRRAP	Transformation/transcription domain-associated protein [OS=Homo sapiens]	Q9Y4A5
6,567847	6,48735	6,416192	6,547254	6,40135	6,758547	6,810205	6,753277	6,78511	6,812055	FALSK		9	+	CRVO_Control	13	36	11	1	1146	2	13	0,00149586	0,004395973	0,299839973	0,147073747	FAM120A	Isoform F of Constitutive coactivator of PPAR-gamma-like protein 1 [OS=Homo sapiens]	Q9NZB2-6
6,037218	6,77675	6,60313	6,617409	6,282618	6,664937	6,703676	6,891102	6,931145	6,710234	FALSK		14			3	6	3	1	210	0	3	0,050385735	0,071728247	0,316793919	0,149826164	STXBP6	Syntaxin-binding protein 6 [OS=Homo sapiens]	Q8NFX7-1
6,732523	6,518819	6,243061	6,463852	6,43455	6,796224	6,71889	6,734312	6,825221	6,844633	FALSK		14			13	21	9	1	833	4	13	0,016508682	0,027765933	0,305294991	0,146998459	SMEK1;PPP4R3A	Serine/threonine-protein phosphatase 4 regulatory subunit 3A [OS=Homo sapiens]	Q6IN85
6,636613	6,508404	6,368867	6,516393	6,390583	6,793101	6,731998	6,850465	6,809274	6,735921	FALSK		1			8	38	8	1	331	0	8	0,005658685	0,011786854	0,299979782	0,145942848	NUDC	nuclear migration protein nudC [OS=Homo sapiens]	Q9Y266
6,537971	6,508314	6,495991	6,439159	6,439347	6,713695	6,809722	6,794826	6,821602	6,777052	FALSK		12	+	CRVO_Control	6	31	3	1	215	0	6	0,0009615	0,003134177	0,29922266	0,147081719	RAB5B	Ras-related protein Rab-5B [OS=Homo sapiens]	P61020
6,564683	6,068488	5,781687	6,787562	6,764704	6,935343	6,466625	6,825205	6,951282	6,573268	FALSK		7			2	4	2	1	248	0	2	0,151069333	0,186305739	0,35691967	0,162132252	CNPY4	Protein canopy homolog 4 [OS=Homo sapiens]	Q8N129
6,570395	6,60948	6,281068	6,37716	6,567297	6,793282	6,668776	6,816864	6,794226	6,842978	FALSK		1			6	12	6	1	351	0	6	0,020933571	0,033885212	0,3021451	0,1451379	PPP1R8	Nuclear inhibitor of protein phosphatase 1 [OS=Homo sapiens]	Q12972-1
6,559702	6,521053	6,447737	6,516313	6,373811	6,820566	6,713132	6,82975	6,833486	6,713545	FALSK		7	+	CRVO_Control	6	10	6	1	567	0	6	0,000827927	0,00286114	0,298372555	0,146765471	RABGGTA	geranylgeranyl transferase type-2 subunit alpha [OS=Sus scrofa]	A5A779
6,716311	6,489527	6,403879	6,316179	6,391465	6,881516	6,704895	6,72259	6,686851	6,857085	FALSK		5			3	4	3	1	814	0	3	0,004651436	0,010198724	0,307115269	0,149536329	ARHGAP26	Rho GTPase-activating protein 26 [OS=Homo sapiens]	Q9UNA1-1
6,536416	6,633364	6,396177	6,431125	6,428329	6,763695	6,80542	6,844823	6,756834	6,747408	FALSK		17	+	CRVO_Control	8	15	8	1	527	0	8	0,0032249	0,00770359	0,298553753	0,145827202	GPS1	Isoform 2 of COP9 signalosome complex subunit 1 [OS=Homo sapiens]	Q13098-7
6,694725	6,51746	6,262043	6,485854	6,447083	6,761255	6,74694	6,704595	6,758407	6,935805	FALSK		20			6	13	6	1	579	0	6	0,017019034	0,02848528	0,299967384	0,144478059	NCOA5	Nuclear receptor coactivator 5 [OS=Homo sapiens]	Q9HCD5
6,646175	6,454391	6,48399	6,448653	6,395256	6,788282	6,752211	6,800062	6,751354	6,822302	FALSK		1	+	CRVO_Control	15	47	9	1	660	1	15	0,002826541	0,006989834	0,297148895	0,145273643	PABPC4	Isoform 3 of Polyadenylate-binding protein 4 [OS=Homo sapiens]	Q13310-3
6,584088	6,476175	6,447782	6,503148	6,420725	6,834507	6,738825	6,58515	6,820326	6,91346	FALSK		12			2	3	2	1	193	0	2	0,007332958	0,014411219	0,292069912	0,141914856	ZNF740	Zinc finger protein 740 [OS=Homo sapiens]	Q8NDX6
6,678903	6,451558	6,324404	6,436763	6,520885	6,832845	6,804566	6,776402	6,731024	6,769375	FALSK		1	+	CRVO_Control	10	21	10	1	683	0	10	0,003856795	0,008866652	0,30033989	0,146509701	PRPF3	U4/U6 small nuclear ribonucleoprotein Prp3 [OS=Homo sapiens]	O43395
6,456073	6,605197	6,396484	6,531374	6,442394	6,768802	6,857328	6,715383	6,763082	6,808642	FALSK		11	+	CRVO_Control	5	14	4	1	512	0	5	0,000258941	0,001312362	0,296342945	0,146393808	CELF1	Isoform 4 of CUGBP Elav-like family member 1 [OS=Homo sapiens]	Q92879-4
6,624878	6,419539	6,454471	6,522684	6,411475	6,762087	6,79462	6,787436	6,798251	6,766318	FALSK		5	+	CRVO_Control	5	9	5	1	420	0	5	0,002327751	0,006056625	0,295133209	0,144471776	RBM22	Pre-mRNA-splicing factor RBM22 [OS=Homo sapiens]	Q9NW64-1
7,540895	6,328405	3,907275	6,248806	6,501291	7,026246	7,124247	3,723831	6,959935	7,130004	FALSK		10			2	4	2	1	323	0	2	0,341223982	0,383169466	0,287518072	0,126860333	AKR1C4	Aldo-keto reductase family 1 member C4 [OS=Homo sapiens]	P17516
6,599665	6,659963	6,283407	6,355007	6,509514	6,789506	6,708591	6,945298	6,819478	6,618549	FALSK		17			3	6	3	1	389	0	3	0,064079073	0,088047759	0,294773197	0,139299008	CBX8	chromobox protein homolog 8 [OS=Homo sapiens]	Q9HC52
6,711768	6,475804	6,226995	6,54344	6,431285	6,82464	6,642435	6,789092	6,783313	6,854202	FALSK		4			3	9	3	1	336	0	3	0,022892918	0,03655731	0,300877953	0,144393828	AIMP1	Isoform 2 of Aminoacyl tRNA synthase complex-interacting multifunctional protein 1 [OS=Homo sapiens]	Q12904-2
6,506142	6,632929	6,244502	6,471256	6,467383	6,777768	6,883096	6,745613	6,713402	6,7304	FALSK		12	+	CRVO_Control	8	14	2	1	787	0	8	0,003402249	0,008041102	0,305613422	0,149142414	STAT5B	Signal transducer and activator of transcription 5B [OS=Sus scrofa]	Q9TUZ0
6,710822	6,529699	6,289498	6,46107	6,409185	6,71487	6,705894	6,767521	6,798265	6,909208	FALSK		9			5	9	5	1	334	0	5	0,033266463	0,050025054	0,29909668	0,14284824	WDR5	WD repeat-containing protein 5 [OS=Homo sapiens]	P61964
6,630625	6,461861	6,423541	6,467602	6,459386	6,785284	6,766855	6,782668	6,767521	6,808622	FALSK		2	+	CRVO_Control	56	131	56	1	2136	0	56	0,001317193	0,00396308	0,293587112	0,144152011	SNRNP200	U5 small nuclear ribonucleoprotein 200 kDa helicase [OS=Homo sapiens]	O75643-1
6,47522	6,550466	6,220203	6,623222	6,529537	6,677585	6,809274	6,703211	6,941841	6,75833	FALSK		13	+	CRVO_Control	3	4	3	1	333	0	3	0,00398132	0,0090541	0,298318672	0,145516905	EFNB2	Ephrin-B2 [OS=Homo sapiens]	P52799
6,65104	6,519634	6,33539	6,532933	6,392117	6,807125	6,794368	6,676297	6,807354	6,819523	FALSK		7	+	CRVO_Control	2	4	2	1	454	0	2	0,002716929	0,006807587	0,294710732	0,144141541	WIPI2	WD repeat domain phosphoinositide-interacting protein 2 [OS=Homo sapiens]	Q9Y4P8-1
6,213769	6,868556	6,583998	6,278782	6,407572	6,647379	6,858474	6,963563	6,749113	6,666722	FALSK					12	258	12	1	207	0	12	0,024232735	0,038357536	0,306514931	0,14688037		Glutathione S-transferase P [OS=Sus scrofa]	P80031
6,666757	6,523562	6,32553	6,557655	6,354029	6,826549	6,776104	6,733355	6,856737	6,711495	FALSK		9	+	CRVO_Control	2	2	2	1	361	0	2	0,002324022	0,006055234	0,29534111	0,144572711	CAAP1	Caspase activity and apoptosis inhibitor 1 [OS=Homo sapiens]	Q9H8G2-1
6,12472	6,520463	6,604494	6,449389	6,686086	6,778069	6,918737	6,822092	6,694135	6,682313	FALSK		1;12			4	9	4	1	223	0	4	0,049977587	0,071254243	0,302038956	0,143229983	AK4;LOC100507855	Adenylate kinase 4, mitochondrial [OS=Homo sapiens]	P27144
6,667357	6,648037	6,242789	6,454009	6,397132	6,792946	6,870362	6,720116	6,805155	6,715302	FALSK		1			10	137	10	1	189	0	10	0,007372009	0,014450509	0,298911285	0,14513683	PARK7	Protein deglycase DJ-1 [OS=Homo sapiens]	Q99497
6,737189	6,472282	6,432803	6,457059	6,314559	6,774688	6,807354	6,779387	6,71552	6,826503	FALSK		1			4	7	4	1	424	0	4	0,018096696	0,029893061	0,297912216	0,143426039	SF3B4	Splicing factor 3b subunit 4 [OS=Homo sapiens]	Q15427
6,632519	6,509254	6,347796	6,476478	6,475293	6,753716	6,795686	6,794401	6,801522	6,76276	FALSK		21			6	13	6	1	454	0	6	0,004882148	0,010552008	0,293349361	0,142953412	GABPA	GA-binding protein alpha chain [OS=Homo sapiens]	Q06546
6,601398	6,600601	6,303221	6,481297	6,448478	6,744777	6,743053	6,753251	6,840977	6,820817	FALSK		1			14	20	14	1	2549	0	14	0,009815529	0,01830333	0,29357605	0,142276244	MTOR	Serine/threonine-protein kinase mTOR [OS=Homo sapiens]	P42345
6,532781	6,598564	6,374356	6,386849	6,500416	6,753634	6,738557	6,887249	6,747416	6,733742	FALSK					6	7	6	1	732	0	6	0,010822458	0,019696562	0,293526554	0,14212792		Isoform 4 of Phosphatidylinositol 3-kinase regulatory subunit alpha [OS=Homo sapiens]	P27986-4
6,718633	6,530807	6,220043	6,42079	6,503422	6,799206	6,789661	6,825391	6,827491	6,653125	FALSK		6			10	21	10	1	1007	0	10	0,0331846	0,049921754	0,300236225	0,143373226	PRPF4B	Serine/threonine-protein kinase PRP4 homolog [OS=Homo sapiens]	Q13523
6,664096	6,4426	6,438066	6,498116	6,383407	6,712319	6,705898	6,894746	6,82525	6,757517	FALSK		3			6	11	6	1	193	0	6	0,013086603	0,023042875	0,29388876	0,142041166	ARL6	Isoform 2 of ADP-ribosylation factor-like protein 6 [OS=Homo sapiens]	Q9H0F7-2
6,727915	6,578736	6,207686	6,457299	6,437452	6,727105	6,75622	6,751065	6,834887	6,829552	FALSK		17			7	20	7	1	777	0	7	0,034595397	0,05175657	0,297947979	0,142241673	HGS	Hepatocyte growth factor-regulated tyrosine kinase substrate [OS=Homo sapiens]	O14964
6,599169	6,581337	6,291579	6,485337	6,480411	6,709098	6,813779	6,784431	6,833312	6,758142	FALSK		10			5	10	5	1	329	0	5	0,009962657	0,018532106	0,292185688	0,14160443	LOC100511033;UCHL5	Ubiquitin carboxyl-terminal hydrolase isozyme L5 [OS=Sus scrofa]	Q06AT3
6,619289	6,75885	6,215184	6,344868	6,456959	6,83605	6,646693	6,752211	6,947197	6,702491	FALSK		1			3	65	3	1	94	0	3	0,080378025	0,107863042	0,297898293	0,139994277	S100A1	Protein S100-A1 [OS=Homo sapiens]	P23297
6,402183	6,399989	6,493167	6,601307	6,547308	6,674545	6,800857	6,829336	6,633458	6,93993	FALSK		4			6	10	6	1	739	0	6	0,013305861	0,023320628	0,28683424	0,138720514	LETM1	LETM1 and EF-hand domain-containing protein 1, mitochondrial [OS=Homo sapiens]	O95202-1
6,337441	6,768146	6,309282	6,365368	6,61311	6,911015	6,817864	6,562009	6,655294	6,922341	FALSK		1			5	13	5	1	563	0	5	0,024250077	0,038368966	0,295035362	0,14159881	ALDH4A1	Delta-1-pyrroline-5-carboxylate dehydrogenase, mitochondrial [OS=Homo sapiens]	P30038
6,534494	6,460149	6,494229	6,479534	6,494245	6,792373	6,713499	6,760719	6,780038	6,851294	FALSK		12	+	CRVO_Control	18	50	16	1	411	0	18	0,000120277	0,000930549	0,287054634	0,142151831	EIF4A3	Eukaryotic initiation factor 4A-III [OS=Sus scrofa]	A6M931
6,363333	6,629662	6,423059	6,558002	6,461886	6,834407	6,886467	6,608128	6,732458	6,80195	FALSK		8			2	3	2	1	817	0	2	0,006587503	0,013192406	0,28549366	0,138921587	TACC1	Isoform 2 of Transforming acidic coiled-coil-containing protein 1 [OS=Homo sapiens]	O75410-2
6,575204	6,536654	6,30689	6,552238	6,476538	6,793495	6,808941	6,775141	6,783314	6,739373	FALSK		12	+	CRVO_Control	5	13	5	1	611	0	5	0,003090981	0,007444669	0,290547848	0,142041207	EIF4B	eukaryotic translation initiation factor 4B [OS=Homo sapiens]	P23588
6,864186	6,569856	6,083213	6,559186	6,264912	6,818902	6,824004	6,707359	6,813781	6,731998	FALSK		1			2	3	2	1	575	0	2	0,051398905	0,072978745	0,310938263	0,147148786	KCNA3	Potassium voltage-gated channel subfamily A member 3 [OS=Homo sapiens]	P22001
6,57725	6,255377	6,667645	6,512875	6,412446	6,774085	6,810575	6,862415	6,717987	6,727203	FALSK	Acetyl [N-Term]	1			2	9	2	1	666	0	2	0,013290988	0,023305336	0,293334484	0,141760564	TMEM201	Transmembrane protein 201 [OS=Homo sapiens]	Q5SNT2-1
6,036937	6,903575	6,059292	6,545233	6,384919	6,717247	6,830909	6,660161	6,845158	6,676449	FALSK		18			2	2	2	1	655	0	2	0,054215924	0,076491465	0,359993267	0,168738569	MBD1	Isoform 12 of Methyl-CpG-binding domain protein 1 [OS=Homo sapiens]	Q9UIS9-12
6,641611	6,610091	6,333539	6,389552	6,460511	6,797012	6,827709	6,782424	6,665523	6,8129	FALSK		9			3	5	3	1	372	0	3	0,004830586	0,010464429	0,290052891	0,141397678	RABEPK	Rab9 effector protein with Kelch motifs [OS=Homo sapiens]	Q7Z6M1-1
6,535047	6,542118	6,306871	6,47604	6,587887	6,789207	6,743322	6,76509	6,79075	6,807285	FALSK		7	+	CRVO_Control	4	6	4	1	563	0	4	0,0033613	0,007954237	0,289538193	0,141486542	ZKSCAN1	Zinc finger protein with KRAB and SCAN domains 1 [OS=Homo sapiens]	P17029
6,561673	6,500075	6,367056	6,445423	6,571392	6,739957	6,709178	6,798579	6,910365	6,72928	FALSK		6;CHR_HSCHR6_MHC_APD_CTG1;CHR_HSCHR6_MHC_COX_CTG1;CHR_HSCHR6_MHC_DBB_CTG1;CHR_HSCHR6_MHC_MCF_CTG1;CHR_HSCHR6_MHC_QBL_CTG1			3	12	3	1	95	0	3	0,011973125	0,02143065	0,288348198	0,139568904	LSM2	U6 snRNA-associated Sm-like protein LSm2 [OS=Homo sapiens]	Q9Y333
6,640678	6,562989	6,2536	6,403164	6,574889	6,801706	6,780315	6,775084	6,834764	6,702491	FALSK		13			25	50	23	1	1447	2	25	0,020162521	0,032777066	0,291807938	0,140422376	PDS5B	Sister chromatid cohesion protein PDS5 homolog B [OS=Homo sapiens]	Q9NTI5
6,671007	6,561501	6,376616	6,372085	6,44949	6,88909	6,726185	6,739517	6,741619	6,787004	FALSK		19	+	CRVO_Control	4	12	4	1	231	0	4	0,002230084	0,005891462	0,29054327	0,142304808	PAFAH1B3	Platelet-activating factor acetylhydrolase IB subunit gamma [OS=Homo sapiens]	Q15102
6,724161	6,555077	6,210988	6,447475	6,481119	6,827497	6,667905	6,72906	6,838728	6,819489	FALSK		8			4	7	4	1	1288	0	4	0,022352918	0,035845987	0,292771816	0,140696739	OPLAH	5-oxoprolinase [OS=Homo sapiens]	O14841
6,816847	6,513068	6,289735	6,393396	6,395995	6,800412	6,771379	6,842058	6,776761	6,700553	FALSK		9			10	20	5	1	1590	0	10	0,033142816	0,049878688	0,296424294	0,141636291	SMARCA2	Probable global transcription activator SNF2L2 [OS=Homo sapiens]	P51531
6,78745	6,639434	6,212751	6,341989	6,372872	6,88451	6,835709	6,563416	6,744061	6,833863	FALSK					16	30	15	1	1152	0	16	0,011054002	0,020040995	0,301412773	0,145793613		Isoform 5 of Voltage-dependent calcium channel subunit alpha-2/delta-2 [OS=Homo sapiens]	Q9NY47-5
6,724293	6,556873	6,269711	6,458358	6,422765	6,791804	6,798179	6,76524	6,730433	6,80602	FALSK		16			8	18	8	1	1267	0	8	0,015275923	0,026204083	0,291935158	0,140908739	NOMO2	NODAL modulator 2 [OS=Homo sapiens]	Q5JPE7
6,870624	6,613678	6,207976	6,296931	6,381017	6,720113	6,71673	6,732458	6,885086	6,826875	FALSK		18			18	219	6	1	446	0	18	0,098362437	0,128273822	0,302207088	0,141166298	TUBB6	Tubulin beta-6 chain [OS=Homo sapiens]	Q9BUF5
6,561172	6,566776	6,37671	6,493882	6,469235	6,753065	6,729876	6,820743	6,801303	6,78526	FALSK		4			18	58	18	1	973	0	18	0,004760704	0,010366358	0,2844944	0,138768163	USO1	Isoform 2 of General vesicular transport factor p115 [OS=Homo sapiens]	O60763-2
6,370542	6,613236	6,395602	6,578825	6,496611	6,784556	6,799047	6,744151	6,725864	6,834398	FALSK		3			5	10	5	1	417	0	5	0,00497982	0,010671847	0,286640167	0,139746022	PPP4R2	Serine/threonine-protein phosphatase 4 regulatory subunit 2 [OS=Homo sapiens]	Q9NY27
6,628243	6,69032	6,338228	6,443021	6,272766	6,705709	6,760341	6,730525	6,802444	6,847884	FALSK		19			4	15	4	1	528	0	4	0,038967796	0,057503664	0,294864941	0,140581041	PRKCSH	Glucosidase 2 subunit beta [OS=Homo sapiens]	P14314
6,47944	6,596794	6,404267	6,372916	6,576272	6,851554	6,665325	6,743475	6,773188	6,846243	FALSK					8	9	8	1	3929	0	8	0,008187968	0,015796737	0,290019417	0,140821208		Isoform 6 of A-kinase anchor protein 9 [OS=Homo sapiens]	Q99996-6
6,40677	6,513044	6,471023	6,493455	6,586452	6,711973	6,850497	6,815017	6,758887	6,749332	FALSK		8	+	CRVO_Control	2	4	2	1	251	0	2	0,001027761	0,003315952	0,282992554	0,139192454	DERL1	Derlin-1 [OS=Homo sapiens]	Q9BUN8
6,649432	6,513582	6,349648	6,481396	6,469137	6,840735	6,827709	6,770828	6,727756	6,716583	FALSK		X	+	CRVO_Control	8	34	7	1	194	1	8	0,001964545	0,005369566	0,284083462	0,139296504	PGRMC1	Membrane-associated progesterone receptor component 1 [OS=Sus scrofa]	Q95250
6,503031	6,598425	6,392317	6,43296	6,543805	6,803485	6,649615	6,846744	6,91767	6,65392	FALSK		19			3	5	2	1	609	0	3	0,033111402	0,049851202	0,280179405	0,134202284	NUMBL	Numb-like protein [OS=Homo sapiens]	Q9Y6R0
6,185947	6,827042	6,125734	6,342532	6,628374	6,80219	6,650162	6,562007	6,844649	6,845762	FALSK		11			2	4	2	1	325	0	2	0,084863349	0,112803982	0,319028187	0,149080332	MACROD1	O-acetyl-ADP-ribose deacetylase MACROD1 [OS=Homo sapiens]	Q9BQ69
6,634518	6,708715	6,276004	6,402585	6,413854	6,884622	6,875312	6,802301	6,597865	6,704147	FALSK		X			4	12	4	1	144	0	4	0,011034198	0,020014662	0,285713863	0,138437314	EIF1AX;LOC101060318	Eukaryotic translation initiation factor 1A, X-chromosomal [OS=Homo sapiens]	P47813
6,665478	6,549131	6,640611	6,254613	6,302853	6,525397	6,949615	6,746555	6,468466	7,0687	FALSK		2			2	4	2	1	387	0	2	0,150917964	0,186240235	0,269209576	0,125106573	TSSC1	Protein TSSC1 [OS=Homo sapiens]	Q53HC9
6,93913	6,561477	6,133281	6,299397	6,410392	6,706495	6,711384	6,769371	6,820493	6,867617	FALSK		7			5	12	5	1	283	0	5	0,122679838	0,155857663	0,306336498	0,142023831	CNPY3	Protein canopy homolog 3 [OS=Sus scrofa]	A5GFQ5
6,541989	6,532697	6,431828	6,4757	6,498163	6,811193	6,731145	6,83099	6,775786	6,734025	FALSK		17	+	CRVO_Control	4	19	4	1	113	0	4	0,001195843	0,003694737	0,280552483	0,137921596	EIF1	eukaryotic translation initiation factor 1 [OS=Homo sapiens]	P41567
6,619113	6,655058	6,325082	6,683434	6,07455	6,858314	6,692086	6,749259	6,930057	6,617003	FALSK		19			2	3	2	1	297	0	2	0,026265578	0,041111812	0,297896576	0,142768663	ERCC1	DNA excision repair protein ERCC-1 [OS=Homo sapiens]	P07992-1
6,688599	6,592619	6,392313	6,416155	6,369814	6,82718	6,74543	6,814206	6,76509	6,728555	FALSK		19			8	23	2	1	400	0	8	0,008022414	0,01554061	0,284192371	0,138094603	MAP2K2	Dual specificity mitogen-activated protein kinase kinase 2 [OS=Homo sapiens]	P36507
6,423764	6,675356	6,430902	6,503023	6,413577	6,801724	6,73641	6,602881	6,854209	6,845041	FALSK		17			8	15	7	1	815	1	8	0,016155124	0,027365539	0,278728771	0,134670142	PPP1R9B	Neurabin-2 [OS=Homo sapiens]	Q96SB3
6,369829	6,62621	5,986104	6,643022	6,706912	7,073442	6,703896	6,580931	6,724494	6,717636	FALSK		3			2	3	2	1	166	0	2	0,115898304	0,148185657	0,293664265	0,136797281	CCDC12	Coiled-coil domain-containing protein 12 [OS=Homo sapiens]	Q8WUD4
6,609606	6,525796	6,421911	6,386157	6,534923	6,747291	6,784218	6,80735	6,755184	6,780802	FALSK		8	+	CRVO_Control	8	13	8	1	1443	0	8	0,003495029	0,008209203	0,279290199	0,136556534	CPSF1	Cleavage and polyadenylation specificity factor subunit 1 [OS=Homo sapiens]	Q10570
6,706621	6,56142	6,26619	6,420756	6,496735	6,784473	6,845411	6,726822	6,760603	6,757854	FALSK		20			8	25	8	1	224	0	8	0,010197367	0,018839288	0,284688091	0,138051775	CHMP4B	Charged multivesicular body protein 4b [OS=Homo sapiens]	Q9H444
6,467591	6,573372	6,346952	6,283532	6,740314	6,625978	6,651328	6,707549	6,902726	6,935052	FALSK		1			2	3	2	1	356	0	2	0,042446912	0,061938508	0,282174301	0,13462371	HS2ST1	Heparan sulfate 2-O-sulfotransferase 1 [OS=Homo sapiens]	Q7LGA3-1
6,708448	6,602224	6,253116	6,399135	6,480897	6,727637	6,769492	6,877543	6,7608	6,73393	FALSK		11			9	22	9	1	800	0	9	0,048559962	0,069415843	0,285116673	0,135663686	SART1	U4/U6.U5 tri-snRNP-associated protein 1 [OS=Homo sapiens]	O43290
6,388878	6,588495	6,437617	6,508804	6,523221	6,718723	6,838323	6,740203	6,754083	6,801219	FALSK		10	+	CRVO_Control	3	4	3	1	576	0	3	6,14E-05	0,000682146	0,281106758	0,139439129	PTEN	Isoform alpha of Phosphatidylinositol 3,4,5-trisphosphate 3-phosphatase and dual-specificity protein phosphatase PTEN [OS=Homo sapiens]	P60484-2
6,701826	6,581954	6,017922	6,785289	6,272397	6,92837	7,182891	6,584962	6,565292	6,491853	FALSK		10			2	3	2	1	726	0	2	0,133962456	0,168162805	0,278796387	0,129754532	NHLRC2	NHL repeat-containing protein 2 [OS=Homo sapiens]	Q8NBF2-1
6,665833	6,641595	6,31205	6,297504	6,535647	6,810911	6,805646	6,748425	6,7528	6,754729	FALSK		6			20	147	16	1	1005	0	20	0,013451101	0,02350997	0,283976555	0,137368977	EPB41L2	band 4.1-like protein 2 [OS=Homo sapiens]	O43491-1
6,707172	6,510579	6,266102	6,442599	6,526881	6,789826	6,718283	6,802095	6,762029	6,800842	FALSK		20			13	55	13	1	530	0	13	0,018977036	0,031103304	0,283948135	0,136870746	RBM39	RNA-binding protein 39 [OS=Homo sapiens]	Q14498-1
6,40211	6,244693	6,405386	6,519204	6,327969	6,622364	6,694468	6,828125	6,755422	6,598063	FALSK		7	+	CRVO_Control	2	5	2	1	615	0	2	0,002719265	0,006804445	0,319815731	0,156129345	NUB1	NEDD8 ultimate buster 1 [OS=Homo sapiens]	Q9Y5A7
6,638778	6,605008	6,262858	6,461786	6,495701	6,806241	6,733885	6,778361	6,821292	6,728942	FALSK		X			3	12	3	1	178	0	3	0,01635469	0,027580351	0,280917835	0,135674875	PRAF2	PRA1 family protein 2 [OS=Homo sapiens]	O60831
6,694874	6,41378	6,417716	6,40566	6,52911	6,63501	6,759167	6,809278	6,783408	6,866534	FALSK		12			7	9	7	1	1054	0	7	0,030804848	0,047032291	0,278451252	0,133539042	C2CD5;KIAA0528	Isoform 5 of C2 domain-containing protein 5 [OS=Homo sapiens]	Q86YS7-5
6,86773	6,349769	6,38539	6,477994	6,260856	6,864791	6,590949	6,882593	6,741109	6,714222	FALSK		16			4	7	4	1	254	0	4	0,031036349	0,04723356	0,290385246	0,139004572	FAM192A	Protein FAM192A [OS=Homo sapiens]	Q9GZU8
6,581593	6,67205	6,296196	6,46437	6,438293	6,798941	6,658525	6,768978	6,808044	6,815796	FALSK		5			5	13	5	1	479	0	5	0,02905827	0,04474407	0,279556656	0,134150261	PAIP1	Polyadenylate-binding protein-interacting protein 1 [OS=Homo sapiens]	Q9H074
6,560782	6,354142	6,344598	6,624828	6,543914	6,806435	6,743418	6,738461	6,790676	6,775032	FALSK		21	+	CRVO_Control	4	5	3	1	1147	1	4	0,00330322	0,007831462	0,285151386	0,139405437	SCAF4	Splicing factor, arginine/serine-rich 15 [OS=Homo sapiens]	O95104
7,004756	6,783788	5,992013	6,403408	6,037365	6,796331	6,783025	6,762703	6,852022	6,67101	FALSK		5			5	10	5	1	520	0	5	0,153657709	0,189005962	0,328752327	0,150317513	HMGCS1	hydroxymethylglutaryl-CoA synthase, cytoplasmic [OS=Homo sapiens]	Q01581
6,584023	6,616076	6,327256	6,504564	6,451165	6,847779	6,771932	6,734687	6,699657	6,812292	FALSK		2	+	CRVO_Control	13	27	11	1	341	2	13	0,004420282	0,009805319	0,276652718	0,135099183	CAB39	Calcium-binding protein 39 [OS=Homo sapiens]	Q9Y376
6,655125	6,533255	6,297915	6,516439	6,472157	6,763463	6,776696	6,712868	6,82843	6,787248	FALSK		19			19	99	17	1	711	0	19	0,0053068	0,011201602	0,278763103	0,135940364	KHSRP	Far upstream element-binding protein 2 [OS=Homo sapiens]	Q92945
6,755438	6,427062	6,368201	6,513998	6,394663	6,692449	6,752878	6,845576	6,787666	6,785241	FALSK		2			3	8	3	1	341	0	3	0,038473828	0,056818964	0,280889702	0,134239255	CREB1	Cyclic AMP-responsive element-binding protein 1 [OS=Homo sapiens]	P16220-1
6,335477	6,73812	6,38171	6,483058	6,528612	6,752596	6,841092	6,757108	6,763489	6,749881	FALSK		7			5	11	5	1	1308	0	5	0,00753731	0,014721248	0,279437637	0,13591416	NRCAM	Isoform 5 of Neuronal cell adhesion molecule [OS=Homo sapiens]	Q92823-5
6,729441	6,448733	6,306968	6,429367	6,552201	6,76216	6,709249	6,705564	6,82845	6,856718	FALSK		19			15	34	15	1	856	0	15	0,014238924	0,024704695	0,279086304	0,135005628	HNRNPUL1	Heterogeneous nuclear ribonucleoprotein U-like protein 1 [OS=Homo sapiens]	Q9BUJ2-1
6,931962	6,521996	6,26474	6,173955	6,439975	6,733691	6,683844	6,870675	6,712201	6,852299	FALSK		1			5	8	5	1	538	0	5	0,106894681	0,138117838	0,304016399	0,141622207	RBBP5	Retinoblastoma-binding protein 5 [OS=Homo sapiens]	Q15291-1
6,699657	6,57356	6,319157	6,443572	6,4404	6,780047	6,740792	6,857876	6,73189	6,754882	FALSK		17			6	19	6	1	307	0	6	0,023253347	0,036992631	0,277828121	0,13371938	LRRC59	Leucine-rich repeat-containing protein 59 [OS=Homo sapiens]	Q96AG4
6,549034	6,427938	6,393805	6,44571	6,670576	7,008428	6,714245	6,742784	6,804113	6,562106	FALSK		16			4	16	4	1	305	0	4	0,052196533	0,073917466	0,268922806	0,128159671	RNPS1	RNA-binding protein with serine-rich domain 1 [OS=Homo sapiens]	Q15287-1
6,73064	6,546895	6,629356	6,35931	6,175924	6,740118	6,70044	6,626439	7	6,768184	FALSK		22			2	3	2	1	683	0	2	0,119075937	0,151787786	0,278611279	0,130140121	THOC5	THO complex subunit 5 homolog [OS=Homo sapiens]	Q13769
6,556741	6,55534	6,30717	6,483418	6,588168	6,760805	6,773252	6,7454	6,80022	6,78217	FALSK		18	+	CRVO_Control	11	19	11	1	1250	0	11	0,004136122	0,00931672	0,274202251	0,133986131	KIAA1468	Isoform 2 of LisH domain and HEAT repeat-containing protein KIAA1468 [OS=Homo sapiens]	Q9P260-2
6,678611	6,374935	6,612803	6,52792	6,281012	6,823317	6,69439	6,857826	6,803439	6,671759	FALSK		4	+	CRVO_Control	9	29	9	1	277	0	9	0,002515827	0,006388146	0,275090027	0,134796959	IMPA1	Inositol monophosphatase 1 [OS=Sus scrofa]	O77591
6,654218	6,468184	6,345064	6,507389	6,50455	6,811415	6,728581	6,748991	6,807327	6,749777	FALSK		21	+	CRVO_Control	5	9	5	1	240	0	5	0,002427965	0,00625725	0,27333746	0,133980451	U2AF1;LOC102724594;U2AF1L5	Splicing factor U2AF 35 kDa subunit [OS=Homo sapiens]	Q01081
6,666899	6,554979	6,271461	6,521191	6,470597	6,800305	6,720379	6,760181	6,757556	6,820097	FALSK		1			7	22	7	1	414	0	7	0,01349018	0,023567406	0,274678421	0,133009251	TARDBP	TAR DNA-binding protein 43 [OS=Homo sapiens]	Q13148-1
6,569718	6,504438	6,52529	6,424585	6,467273	6,758769	6,634927	6,73463	6,867433	6,836461	FALSK		17			5	9	5	1	950	0	5	0,010394849	0,019101731	0,268183136	0,130255285	BCAS3	Isoform 4 of Breast carcinoma-amplified sequence 3 [OS=Homo sapiens]	Q9H6U6-8
6,999972	6,46842	6,254219	6,363675	6,289952	6,748162	6,776066	6,760885	6,740736	6,831556	FALSK		11			37	414	25	1	646	13	37	0,107814756	0,139211765	0,296233463	0,138204663	HSPA8	Heat shock cognate 71 kDa protein [OS=Homo sapiens]	P11142-1
6,480661	6,54294	6,422212	6,483988	6,563892	6,814577	6,837879	6,793777	6,691664	6,708992	FALSK		14	+	CRVO_Control	8	18	7	1	467	1	8	0,002864179	0,00703245	0,270639229	0,13256646	PPP2R5E	Serine/threonine-protein phosphatase 2A 56 kDa regulatory subunit epsilon isoform [OS=Homo sapiens]	Q16537
6,659822	6,617459	6,336256	6,495172	6,372623	6,776653	6,825052	6,723519	6,751518	6,779032	FALSK		8			4	6	4	1	190	0	4	0,007343983	0,014417939	0,274888515	0,133787063	DCTN6	Dynactin subunit 6 [OS=Homo sapiens]	O00399
6,812484	6,846521	6,001116	6,466281	6,200626	7,00449	7,125392	6,290205	6,667081	6,619674	FALSK		14	+	CRVO_Control	4	8	4	1	483	0	4	0,002500651	0,006370947	0,275962639	0,135220371	ACOT2	Acyl-coenzyme A thioesterase 2, mitochondrial [OS=Homo sapiens]	P49753-1
5,623893	6,708707	6,549476	6,735667	6,626658	6,883742	6,700293	6,757529	6,786027	6,718075	FALSK		17			5	12	5	1	185	0	5	0,248904623	0,290427031	0,320253277	0,143126351	DUSP3	dual specificity protein phosphatase 3 [OS=Homo sapiens]	P51452
6,589018	6,538626	6,465708	6,502411	6,40257	6,878937	6,756758	6,756066	6,793385	6,653302	FALSK		6	+	CRVO_Control	4	16	4	1	307	0	4	5,25E-05	0,000640233	0,268023109	0,133036984	ECHDC1	Ethylmalonyl-CoA decarboxylase [OS=Homo sapiens]	Q9NTX5
6,575387	6,560378	6,447259	6,496776	6,376729	6,717955	6,72214	6,771279	6,746496	6,875346	FALSK		8			3	6	3	1	547	0	3	0,013016106	0,022950724	0,275337505	0,133362579	ELP3	elongator complex protein 3 [OS=Homo sapiens]	Q9H9T3
6,522026	6,613951	6,362548	6,394384	6,592968	6,783689	6,692514	6,774219	6,849206	6,741819	FALSK		5			4	9	4	1	505	0	4	0,020283252	0,032945076	0,271114159	0,130804322	FAM114A2	Protein FAM114A2 [OS=Homo sapiens]	Q9NRY5
6,529449	6,504157	6,440454	6,5258	6,516488	6,783314	6,734618	6,776696	6,697887	6,859222	FALSK		7	+	CRVO_Control	18	42	16	1	419	2	18	0,001186674	0,003675393	0,267078114	0,131407674	BZW2	Basic leucine zipper and W2 domain-containing protein 2 [OS=Homo sapiens]	Q9Y6E2
6,122421	6,501258	6,539573	6,646472	6,537761	6,752658	6,585709	6,819698	6,918669	6,724703	FALSK		12			3	3	2	1	430	0	3	0,0340866	0,051076008	0,290790558	0,139005491	KRT18	Keratin, type I cytoskeletal 18 [OS=Homo sapiens]	P05783
6,614541	6,642366	6,281288	6,547649	6,404209	6,758094	6,802572	6,72697	6,816977	6,746133	FALSK		9			4	20	4	1	186	0	4	0,008594229	0,016438306	0,272138309	0,132324737	DCTN3	Dynactin subunit 3 [OS=Homo sapiens]	O75935
6,703828	6,570177	6,38353	6,473176	6,359994	6,803898	6,770851	6,770088	6,773396	6,732987	FALSK		20			6	87	2	1	221	4	6	0,007386693	0,01447181	0,272103024	0,132461374	TMEM189-UBE2V1	Isoform 1 of Ubiquitin-conjugating enzyme E2 variant 1 [OS=Homo sapiens]	Q13404-1
6,491853	6,590399	6,377207	6,533347	6,510931	6,748851	6,75595	6,690615	6,752056	6,880315	FALSK		5	+	CRVO_Control	3	3	3	1	418	0	3	0,001742848	0,004945462	0,264810085	0,130089947	C5orf44;TRAPPC13	Isoform 4 of Trafficking protein particle complex subunit 13 [OS=Homo sapiens]	A5PLN9-5
[truncated: 2,183 more rows]
