# Supplementary material for: IL-18 and S100A12 Are Upregulated in Experimental Central Retinal Vein Occlusion
Source: Int J Mol Sci. 2018 Oct 25;19(11):3328. doi: 10.3390/ijms19113328 (PMC6274751; doi:10.3390/ijms19113328)
Supplement: Supplementary file 1 [file ijms-19-03328-s001.zip › Supplementary file 2.txt]

Checked	Protein FDR Confidence	Master	Accession	Description	Contaminant	Exp. q-value	Sum PEP Score	Coverage	# Peptides	# PSMs	# Unique Peptides	# Protein Groups	# AAs	MW [kDa]	calc. pI	Found in Sample: [S1] F1: 126, Sample, n/a, n/a	Found in Sample: [S2] F1: 127N, Sample, n/a, n/a	Found in Sample: [S3] F1: 127C, Sample, n/a, n/a	Found in Sample: [S4] F1: 128N, Sample, n/a, n/a	Found in Sample: [S5] F1: 128C, Sample, n/a, n/a	Found in Sample: [S11] F2: 126, Sample, n/a, n/a	Found in Sample: [S12] F2: 127N, Sample, n/a, n/a	Found in Sample: [S13] F2: 127C, Sample, n/a, n/a	Found in Sample: [S14] F2: 128N, Sample, n/a, n/a	Found in Sample: [S15] F2: 128C, Sample, n/a, n/a	Found in Sample: [S6] F1: 129N, Control, n/a, n/a	Found in Sample: [S7] F1: 129C, Control, n/a, n/a	Found in Sample: [S8] F1: 130N, Control, n/a, n/a	Found in Sample: [S9] F1: 130C, Control, n/a, n/a	Found in Sample: [S10] F1: 131, Control, n/a, n/a	Found in Sample: [S16] F2: 129N, Control, n/a, n/a	Found in Sample: [S17] F2: 129C, Control, n/a, n/a	Found in Sample: [S18] F2: 130N, Control, n/a, n/a	Found in Sample: [S19] F2: 130C, Control, n/a, n/a	Found in Sample: [S20] F2: 131, Control, n/a, n/a	Modifications	Entrez Gene ID	Ensembl Gene ID	Gene ID	Chromosome	Biological Process	Cellular Component	Molecular Function	Pfam IDs	Abundance Ratio: (Sample) / (Control)	Abundance Ratio (log2): (Sample) / (Control)	Abundances (Grouped): Sample	Abundances (Grouped): Control	Abundances (Grouped) Standard Error [%]: Sample
FALSK	High	Master Protein	Q92953	Potassium voltage-gated channel subfamily B member 2 [OS=Homo sapiens]	FALSK	0,000112082	7,138575521	3,293084523	2	3	2	1	911	102,498	6,14	High	High	Not Found	High	High	Not Found	Not Found	Not Found	Not Found	High	High	High	High	High	High	Not Found	Not Found	Not Found	High	Not Found		9312	ENSG00000182674.5	KCNB2	8	cell organization and biogenesis;regulation of biological process;transport	membrane	protein binding;transporter activity	Pf00520, Pf02214, Pf03521, Pf07885, Pf08016
FALSK	High	Master Protein	P11532-6	Isoform 6 of Dystrophin [OS=Homo sapiens]	FALSK	0	19,76628006	12,75590551	6	11	1	1	635	72,145	6,15	Not Found	Not Found	Not Found	Not Found	Not Found	Not Found	Not Found	Not Found	Not Found	Not Found	Not Found	Not Found	Not Found	Not Found	Not Found	Not Found	Not Found	Not Found	Not Found	High		1756	ENSG00000198947.15	DMD	X	cell organization and biogenesis;cellular component movement;cellular homeostasis;metabolic process;regulation of biological process;response to stimulus	cell surface;cytoskeleton;cytosol;membrane;nucleus	metal ion binding;protein binding;structural molecule activity	Pf00569, Pf09068, Pf09069
FALSK	High	Master Protein	Q9ULB1-3	Isoform 3a of Neurexin-1 [OS=Homo sapiens]	FALSK	0	13,96375982	3,167420814	4	5	1	1	1547	169,805	6,13	Not Found	Not Found	Not Found	Not Found	Not Found	High	High	High	Not Found	High	Not Found	Not Found	Not Found	Not Found	Not Found	High	High	High	High	High		9378	ENSG00000179915.22	NRXN1	2	cell communication;cell differentiation;cell organization and biogenesis;cellular component movement;regulation of biological process;response to stimulus;transport	cell surface;endoplasmic reticulum;membrane	metal ion binding;protein binding;receptor activity;signal transducer activity	Pf00008, Pf00054, Pf02210, Pf13385
FALSK	High	Master Protein	P29508	Serpin B3 [OS=Homo sapiens]	FALSK	0	21,65393553	24,1025641	7	12	2	1	390	44,537	6,81	High	High	High	High	High	High	High	High	High	High	High	High	High	Not Found	High	High	High	High	Not Found	High		6317	ENSG00000057149.15	SERPINB3	18	cell communication;regulation of biological process	cytoplasm;nucleus	enzyme regulator activity;protein binding;receptor activity	Pf00079
FALSK	High	Master Protein	O75334-1	Liprin-alpha-2 [OS=Homo sapiens]	FALSK	0	11,18299655	3,261734288	3	6	1	1	1257	143,202	6,11	High	High	Not Found	High	High	High	High	Not Found	High	High	High	High	High	High	High	High	High	High	High	High		8499	ENSG00000139220.16	PPFIA2	12	cell organization and biogenesis;cellular component movement;metabolic process;regulation of biological process;transport	cell surface;cytoplasm;cytoskeleton;cytosol;Golgi	catalytic activity;motor activity;protein binding	Pf00536, Pf00769, Pf01576, Pf02463, Pf04111, Pf04156, Pf05557, Pf05622, Pf06008, Pf06160, Pf06785, Pf07647, Pf07888, Pf09726, Pf09728, Pf09731, Pf09787, Pf10146, Pf10168, Pf10174, Pf12072, Pf12128, Pf12718, Pf13851, Pf13868, Pf15070, Pf15619
FALSK	High	Master Protein	Q9BYT8	Neurolysin, mitochondrial [OS=Homo sapiens]	FALSK	0	24,14825092	12,35795455	7	13	1	1	704	80,6	6,64	Not Found	Not Found	Not Found	Not Found	Not Found	Not Found	High	High	Not Found	Not Found	Not Found	Not Found	Not Found	Not Found	Not Found	High	High	Not Found	High	High		57486	ENSG00000123213.22	NLN	5	metabolic process;regulation of biological process	cytoplasm;cytosol;membrane;mitochondrion	catalytic activity;metal ion binding	Pf01432
FALSK	High	Master Protein	Q16566	calcium/calmodulin-dependent protein kinase type IV [OS=Homo sapiens]	FALSK	0,000112082	7,608023624	7,188160677	2	3	2	1	473	51,893	5,82	High	High	Not Found	High	High	Not Found	Not Found	Not Found	Not Found	Not Found	High	High	High	High	High	High	Not Found	High	High	High		814	ENSG00000152495.10	CAMK4	5	cell differentiation;defense response;metabolic process;regulation of biological process;response to stimulus	cytoplasm;cytosol;nucleus	catalytic activity;nucleotide binding;protein binding	Pf00069, Pf07714, Pf14531
FALSK	High	Master Protein	Q16181	Septin-7 [OS=Homo sapiens]	FALSK	0	88,40996252	40,27459954	15	96	1	1	437	50,648	8,63	Not Found	High	Not Found	Not Found	High	High	Not Found	High	Not Found	Not Found	High	High	High	High	High	High	High	High	Not Found	High		989		sep-07	7	cell division;cell organization and biogenesis;regulation of biological process	chromosome;cytoplasm;cytoskeleton;cytosol;membrane;nucleus	nucleotide binding;protein binding;structural molecule activity	Pf00735, Pf01926, Pf10211
FALSK	High	Master Protein	O43639	Cytoplasmic protein NCK2 [OS=Homo sapiens]	FALSK	0,000482114	4,799025357	5,789473684	2	5	1	1	380	42,889	6,95	Not Found	Not Found	Not Found	Not Found	Not Found	High	High	Not Found	High	Not Found	Not Found	Not Found	Not Found	Not Found	Not Found	High	High	High	High	High		8440	ENSG00000071051.13	NCK2	2	cell organization and biogenesis;cellular component movement;regulation of biological process;response to stimulus;transport	cytoplasm;cytosol;endoplasmic reticulum;membrane	protein binding;structural molecule activity	Pf00017, Pf00018, Pf07653, Pf08239, Pf14604
FALSK	High	Master Protein	P13646	Keratin, type I cytoskeletal 13 [OS=Homo sapiens]	FALSK	0	20,14721977	9,825327511	4	18	1	1	458	49,557	4,96	Not Found	Not Found	Not Found	Not Found	Not Found	High	High	High	High	High	Not Found	Not Found	Not Found	Not Found	Not Found	High	Not Found	High	High	High		3860	ENSG00000171401.14	KRT13	17	cell organization and biogenesis;response to stimulus	cytoskeleton;nucleus	structural molecule activity	Pf00038
FALSK	High	Master Protein	Q8N138	ORM1-like protein 3 [OS=Homo sapiens]	FALSK	0,000396275	6,544535775	16,99346405	2	3	1	1	153	17,483	9,64	High	High	High	High	High	Not Found	Not Found	Not Found	Not Found	Not Found	High	High	High	High	High	Not Found	Not Found	Not Found	Not Found	Not Found	Acetyl [N-Term]	94103	ENSG00000172057.9	ORMDL3	17	cellular homeostasis;metabolic process;regulation of biological process	endoplasmic reticulum;membrane	protein binding	Pf04061
FALSK	High	Master Protein	P24821	Tenascin [OS=Homo sapiens]	FALSK	0	40,86575583	6,951385734	10	23	2	1	2201	240,7	4,89	High	High	High	High	High	Not Found	Not Found	Not Found	Not Found	Not Found	High	High	Not Found	Not Found	Not Found	Not Found	Not Found	Not Found	Not Found	Not Found		3371	ENSG00000041982.15	TNC	9	cell communication;cell differentiation;cell organization and biogenesis;regulation of biological process;response to stimulus	extracellular;membrane	protein binding	Pf00041, Pf00147, Pf07974
FALSK	High	Master Protein	P12682	High mobility group protein B1 [OS=Sus scrofa]	FALSK	0	52,36345284	46,04651163	7	45	1	1	215	24,901	5,88	Not Found	Not Found	Not Found	Not Found	Not Found	Not Found	Not Found	Not Found	Not Found	Not Found	Not Found	Not Found	Not Found	High	Not Found	Not Found	Not Found	Not Found	Not Found	Not Found		445521		HMGB1	11	cell organization and biogenesis;defense response;metabolic process;regulation of biological process;response to stimulus;transport	chromosome;cytoplasm;endosome;extracellular;membrane;nucleus	DNA binding;protein binding	Pf00505, Pf09011
FALSK	High	Master Protein	O43295-2	Isoform 2 of SLIT-ROBO Rho GTPase-activating protein 3 [OS=Homo sapiens]	FALSK	0	59,03585004	20,8372093	17	29	1	1	1075	121,704	6,58	Not Found	Not Found	Not Found	Not Found	Not Found	Not Found	Not Found	Not Found	Not Found	Not Found	Not Found	Not Found	Not Found	Not Found	Not Found	Not Found	Not Found	Not Found	Not Found	Not Found		9901	ENSG00000196220.15	SRGAP3	3	regulation of biological process;response to stimulus	cytoplasm;cytosol	enzyme regulator activity;protein binding	Pf00018, Pf00611, Pf00620, Pf07653, Pf14604
FALSK	High	Master Protein	A2ICN5-1	Myocyte-specific enhancer factor 2A [OS=Sus scrofa]	FALSK	0,000396275	6,07288459	5,719921105	2	3	1	1	507	54,448	6,96	Not Found	Not Found	Not Found	Not Found	Not Found	Not Found	Not Found	Not Found	Not Found	Not Found	Not Found	High	Not Found	Not Found	Not Found	Not Found	Not Found	Not Found	Not Found	Not Found		100037273		MEF2A	1	cell death;cell differentiation;cell organization and biogenesis;development;metabolic process;regulation of biological process;response to stimulus	nucleus	DNA binding;protein binding	Pf00319, Pf12347
FALSK	High	Master Protein	P47929	galectin-7 [OS=Homo sapiens]	FALSK	0	8,92019382	19,85294118	2	3	2	1	136	15,066	7,62	High	High	High	Not Found	Not Found	High	Not Found	High	Not Found	Not Found	High	Not Found	High	Not Found	Not Found	Not Found	Not Found	High	Not Found	Not Found		3963; 653499	ENSG00000282902.1; ENSG00000283082.1; ENSG00000205076.4; ENSG00000178934.4	LGALS7; LGALS7B	19; CHR_HG26_PATCH	cell death	cytoplasm;extracellular;nucleus		Pf00337
FALSK	High	Master Protein	P62633-4	Isoform 4 of Cellular nucleic acid-binding protein [OS=Homo sapiens]	FALSK	0	17,91464026	32,02247191	4	7	1	1	178	19,579	7,58	High	High	High	High	Not Found	Not Found	Not Found	Not Found	Not Found	Not Found	High	High	High	High	High	Not Found	Not Found	Not Found	Not Found	Not Found		7555	ENSG00000169714.16	CNBP	3	metabolic process;regulation of biological process	cytosol;endoplasmic reticulum;nucleus	DNA binding;metal ion binding;protein binding;RNA binding	Pf00098
FALSK	High	Master Protein	Q9H9S4	Calcium-binding protein 39-like [OS=Homo sapiens]	FALSK	0,000112082	7,401370887	8,308605341	3	6	1	1	337	39,063	8,4	High	High	High	High	High	High	High	High	High	High	High	High	High	High	High	High	High	High	High	High		81617	ENSG00000102547.18	CAB39L	13	regulation of biological process	cytosol	protein binding	Pf08569
FALSK	High	Master Protein	Q9GZX9	Twisted gastrulation protein homolog 1 [OS=Homo sapiens]	FALSK	0,000112082	7,217192682	13,0044843	2	2	2	1	223	24,999	5,34	High	High	High	High	High	Not Found	Not Found	Not Found	Not Found	Not Found	High	High	High	Not Found	High	Not Found	Not Found	Not Found	Not Found	Not Found		57045	ENSG00000128791.11	TWSG1	18	cell differentiation;development;regulation of biological process;response to stimulus	extracellular	protein binding	Pf04668
FALSK	High	Master Protein	P06396	Gelsolin [OS=Homo sapiens]	FALSK	0	87,6843639	27,62148338	16	79	1	1	782	85,644	6,28	High	High	High	High	High	High	High	High	High	High	High	High	High	High	High	High	High	High	High	High		2934	ENSG00000148180.18	GSN	9	cell death;cell organization and biogenesis;metabolic process;regulation of biological process;response to stimulus	cytoplasm;cytoskeleton;cytosol;extracellular;membrane;nucleus	metal ion binding;protein binding	Pf00626
FALSK	High	Master Protein	P52790	Hexokinase-3 [OS=Homo sapiens]	FALSK	0	13,17676807	2,92524377	2	11	1	1	923	98,962	5,4	High	Not Found	Not Found	Not Found	Not Found	Not Found	Not Found	Not Found	Not Found	Not Found	Not Found	Not Found	Not Found	Not Found	Not Found	Not Found	Not Found	Not Found	Not Found	Not Found		3101	ENSG00000160883.10	HK3	5	cellular homeostasis;metabolic process;transport	cytosol;mitochondrion	catalytic activity;nucleotide binding	Pf00349, Pf03727
FALSK	High	Master Protein	P08670	Vimentin [OS=Homo sapiens]	FALSK	0	234,7409888	62,23175966	34	1648	1	1	466	53,619	5,12	High	High	High	High	High	Not Found	Not Found	Not Found	Not Found	Not Found	High	Not Found	Not Found	High	High	Not Found	Not Found	Not Found	Not Found	Not Found		7431	ENSG00000026025.14	VIM	10	cell differentiation;cell organization and biogenesis;cellular component movement;metabolic process;regulation of biological process;response to stimulus	cytoplasm;cytoskeleton;cytosol;membrane	protein binding;RNA binding;structural molecule activity	Pf00038, Pf04111, Pf04156, Pf04732, Pf05622, Pf10186
FALSK	High	Master Protein	Q13362-5	Isoform 5 of Serine/threonine-protein phosphatase 2A 56 kDa regulatory subunit gamma isoform [OS=Homo sapiens]	FALSK	0	19,62915314	12,25225225	6	10	1	1	555	64,251	6,74	High	Not Found	High	Not Found	Not Found	Not Found	Not Found	Not Found	Not Found	Not Found	Not Found	High	High	High	High	Not Found	Not Found	Not Found	Not Found	Not Found		5527	ENSG00000078304.19	PPP2R5C	14	metabolic process;regulation of biological process;response to stimulus	cytosol;nucleus	enzyme regulator activity;protein binding	Pf01603
FALSK	High	Master Protein	Q12873-3	Isoform 3 of Chromodomain-helicase-DNA-binding protein 3 [OS=Homo sapiens]	FALSK	0	20,47443699	4,273919378	6	10	1	1	2059	232,891	6,23	Not Found	Not Found	Not Found	Not Found	Not Found	Not Found	Not Found	Not Found	Not Found	Not Found	Not Found	Not Found	Not Found	Not Found	High	Not Found	Not Found	Not Found	Not Found	Not Found		1107	ENSG00000170004.16	CHD3	17	cell organization and biogenesis;metabolic process;regulation of biological process	cytoplasm;cytoskeleton;nucleus	catalytic activity;DNA binding;metal ion binding;nucleotide binding;protein binding;RNA binding	Pf00176, Pf00271, Pf00385, Pf00628, Pf06461, Pf06465, Pf08073, Pf08074, Pf13831
FALSK	High	Master Protein	P27448-5	MAP/microtubule affinity-regulating kinase 3 [OS=Homo sapiens]	FALSK	0	30,66655813	12,08499336	7	13	1	1	753	84,436	9,57	Not Found	Not Found	Not Found	Not Found	Not Found	Not Found	Not Found	Not Found	Not Found	Not Found	Not Found	Not Found	Not Found	Not Found	Not Found	Not Found	Not Found	Not Found	Not Found	Not Found		4140		MARK3	14	cell organization and biogenesis;metabolic process;regulation of biological process;response to stimulus	cytosol;membrane	catalytic activity;nucleotide binding;protein binding	Pf00069, Pf00627, Pf02149, Pf07714, Pf14531
FALSK	High	Master Protein	P79376	Metallothionein-1C [OS=Sus scrofa]	FALSK	0,000396275	6,391913297	49,18032787	2	3	1	1	61	5,954	7,96	High	High	High	Not Found	High	Not Found	Not Found	Not Found	Not Found	Not Found	High	High	High	High	High	Not Found	Not Found	Not Found	Not Found	Not Found	Acetyl [N-Term]	397417		MT1A	6	regulation of biological process;response to stimulus	cytoplasm;nucleus	metal ion binding
FALSK	High	Master Protein	Q7Z6B7-1	SLIT-ROBO Rho GTPase-activating protein 1 [OS=Homo sapiens]	FALSK	0	9,787864461	3,31797235	3	5	1	1	1085	124,186	6,83	Not Found	Not Found	Not Found	Not Found	Not Found	Not Found	High	Not Found	High	High	Not Found	Not Found	Not Found	Not Found	Not Found	High	High	High	High	High		57522	ENSG00000196935.8	SRGAP1	12	regulation of biological process;response to stimulus	cytoplasm;cytosol	enzyme regulator activity;protein binding	Pf00018, Pf00611, Pf00620, Pf07653, Pf14604
FALSK	High	Master Protein	Q9NQH7-1	Probable Xaa-Pro aminopeptidase 3 [OS=Homo sapiens]	FALSK	0,001553197	3,389871747	4,536489152	2	10	1	1	507	56,997	6,83	Not Found	Not Found	Not Found	Not Found	Not Found	Not Found	Not Found	Not Found	Not Found	Not Found	Not Found	Not Found	Not Found	Not Found	Not Found	High	High	High	High	High		63929	ENSG00000196236.12	XPNPEP3	22	metabolic process	mitochondrion	catalytic activity;metal ion binding	Pf00557, Pf05195
FALSK	High	Master Protein	Q8WUD1	Ras-related protein Rab-2B [OS=Homo sapiens]	FALSK	0	25,33152125	28,24074074	5	24	1	1	216	24,199	7,83	High	High	High	High	High	Not Found	High	High	High	High	High	High	High	High	High	High	High	High	High	High		84932	ENSG00000129472.12	RAB2B	14	regulation of biological process;response to stimulus;transport	endoplasmic reticulum;Golgi;membrane	nucleotide binding;protein binding	Pf00025, Pf00071, Pf01926, Pf08477
FALSK	High	Master Protein	Q9NP58	ATP-binding cassette sub-family B member 6, mitochondrial [OS=Homo sapiens]	FALSK	0,000564493	4,240235488	2,375296912	2	5	2	1	842	93,826	8,48	High	High	High	High	High	High	High	High	High	High	High	High	High	High	High	High	High	High	High	High		10058	ENSG00000115657.12	ABCB6	2	cellular homeostasis;metabolic process;transport	endoplasmic reticulum;endosome;Golgi;membrane;mitochondrion	catalytic activity;nucleotide binding;transporter activity	Pf00005, Pf00664, Pf02463, Pf03193, Pf13304, Pf13558
FALSK	High	Master Protein	Q9Y2D5-4	Isoform 2 of A-kinase anchor protein 2 [OS=Homo sapiens]	FALSK	0,002350176	3,057665976	2,175883953	2	4	1	1	1103	121,997	5,06	Not Found	Not Found	Not Found	Not Found	Not Found	Not Found	Not Found	Not Found	Not Found	Not Found	Not Found	Not Found	Not Found	Not Found	Not Found	Not Found	Not Found	Not Found	Not Found	Not Found		445815	ENSG00000157654.17	PALM2-AKAP2	9
FALSK	High	Master Protein	P04792	Heat shock protein beta-1 [OS=Homo sapiens]	FALSK	0	16,37749395	15,12195122	4	24	1	1	205	22,768	6,4	High	High	High	Not Found	High	Not Found	Not Found	Not Found	Not Found	Not Found	Not Found	High	High	High	High	Not Found	Not Found	Not Found	Not Found	Not Found		3315	ENSG00000106211.8	HSPB1	7	cellular component movement;metabolic process;regulation of biological process;response to stimulus	cytoplasm;cytoskeleton;cytosol;membrane;nucleus;proteasome	enzyme regulator activity;protein binding;RNA binding	Pf00011
FALSK	High	Master Protein	O43602	Neuronal migration protein doublecortin [OS=Homo sapiens]	FALSK	0	11,72326779	10,95890411	3	7	1	1	365	40,548	9,28	Not Found	Not Found	Not Found	Not Found	Not Found	Not Found	Not Found	High	Not Found	Not Found	Not Found	Not Found	Not Found	Not Found	Not Found	High	High	High	High	High		1641	ENSG00000077279.17	DCX	X	cell differentiation;cell growth;cell organization and biogenesis;cellular component movement;development;metabolic process;regulation of biological process;response to stimulus	cytoplasm;cytoskeleton;cytosol;nucleus	catalytic activity;protein binding	Pf03607
FALSK	High	Master Protein	O95340-2	Isoform B of Bifunctional 3'-phosphoadenosine 5'-phosphosulfate synthase 2 [OS=Homo sapiens]	FALSK	0	14,78394554	4,36187399	2	3	1	1	619	69,926	8,03	Not Found	Not Found	Not Found	Not Found	Not Found	High	High	High	High	High	Not Found	Not Found	Not Found	Not Found	Not Found	High	Not Found	Not Found	High	High		9060	ENSG00000198682.12	PAPSS2	10	coagulation;metabolic process	cytosol	catalytic activity;nucleotide binding	Pf01583, Pf01747, Pf13207, Pf13238, Pf13671, Pf14306
FALSK	High	Master Protein	Q9NX95	Syntabulin [OS=Homo sapiens]	FALSK	0,000396275	6,329332455	3,770739065	2	3	1	1	663	72,343	6,25	Not Found	Not Found	Not Found	Not Found	Not Found	High	High	High	Not Found	High	Not Found	Not Found	Not Found	Not Found	Not Found	High	High	High	High	High		55638	ENSG00000147642.16	SYBU	8	regulation of biological process	cytoplasm;cytoskeleton;Golgi;membrane;mitochondrion	protein binding	Pf15290
FALSK	High	Master Protein	Q9Y5B8	Nucleoside diphosphate kinase 7 [OS=Homo sapiens]	FALSK	0,000112082	6,992207984	6,64893617	2	2	2	1	376	42,464	6,47	High	High	High	High	High	Not Found	Not Found	Not Found	Not Found	Not Found	High	Not Found	Not Found	High	Not Found	Not Found	Not Found	Not Found	Not Found	Not Found		29922	ENSG00000143156.13	NME7	1	metabolic process		catalytic activity;metal ion binding;nucleotide binding;protein binding	Pf00334
FALSK	High	Master Protein	P08552	Neurofilament medium polypeptide [OS=Sus scrofa]	FALSK	0	90,9212413	58,02197802	22	161	4	1	455	51,954	5,24	High	High	High	High	High	High	High	High	High	High	High	High	High	High	High	High	High	High	High	High		100625407		LOC100625407; NEFM	14	cell organization and biogenesis;regulation of biological process		structural molecule activity	Pf00038, Pf07888, Pf07902, Pf10186, Pf10498, Pf12128	0,112	-3,16	20,2	179,8	16,26
FALSK	High	Master Protein	Q6PUV4	complexin-2 [OS=Homo sapiens]	FALSK	0	8,206905043	21,64179104	2	7	2	1	134	15,385	5,08	High	High	High	High	High	High	High	High	High	High	High	High	High	High	High	High	High	High	High	High		10814	ENSG00000145920.14	CPLX2	5	cell differentiation;regulation of biological process;transport	cytoplasm;cytosol;vacuole	protein binding	Pf05835	0,13	-2,94	23	177	19,58
FALSK	High	Master Protein	P46410	Glutamine synthetase [OS=Sus scrofa]	FALSK	0	123,881502	50,13404826	14	225	14	1	373	42,003	6,74	High	High	High	High	High	High	High	High	High	High	High	High	High	High	High	High	High	High	High	High		396944		GLUL	9	metabolic process	cytoplasm;mitochondrion	catalytic activity;nucleotide binding	Pf00120, Pf03951	0,13	-2,94	23	177	17,8
FALSK	High	Master Protein	Q9P2W3	Guanine nucleotide-binding protein G(I)/G(S)/G(O) subunit gamma-13 [OS=Homo sapiens]	FALSK	0	11,06570507	40,29850746	3	13	3	1	67	7,944	5,11	High	High	High	High	High	High	High	High	High	High	High	High	High	High	High	High	High	High	High	High	Acetyl [N-Term]	51764	ENSG00000127588.4	GNG13	16	regulation of biological process;response to stimulus	membrane	protein binding;signal transducer activity	Pf00631	0,133	-2,91	23,5	176,5	27,56
FALSK	High	Master Protein	O18766	Rhodopsin [OS=Sus scrofa]	FALSK	0	96,24758017	28,44827586	8	126	8	1	348	39,001	6,65	High	High	High	High	High	High	High	High	High	High	High	High	High	High	High	High	High	High	High	High		397437	ENSSSCG00000011590.1	RHO	13	metabolic process;regulation of biological process;response to stimulus	Golgi;membrane	metal ion binding;receptor activity;signal transducer activity	Pf00001, Pf10323, Pf10413	0,143	-2,8	25,1	174,9	32,29
FALSK	High	Master Protein	O14810	Complexin-1 [OS=Homo sapiens]	FALSK	0	12,55940542	25,37313433	2	9	2	1	134	15,02	4,97	High	High	High	High	High	High	High	High	High	High	High	High	High	High	High	High	High	High	High	High		10815	ENSG00000168993.14	CPLX1	4	cell communication;regulation of biological process;transport	cytoplasm;cytosol	protein binding;transporter activity	Pf05835	0,148	-2,76	25,8	174,2	23,94
FALSK	High	Master Protein	P29973-2	Isoform 2 of cGMP-gated cation channel alpha-1 [OS=Homo sapiens]	FALSK	0	37,25399899	10,54018445	6	19	4	1	759	86,845	6,61	High	High	High	High	High	High	High	High	High	High	High	High	High	High	High	High	High	High	High	High		1259	ENSG00000198515.13	CNGA1	4	regulation of biological process;response to stimulus;transport	membrane	nucleotide binding;protein binding;transporter activity	Pf00027, Pf00520	0,15	-2,73	26,2	173,8	22,08
FALSK	High	Master Protein	Q7YS78	Arrestin-C [OS=Sus scrofa]	FALSK	0	136,3508243	75,19181586	20	100	19	1	391	43,211	5,64	High	High	High	High	High	High	High	High	High	High	High	High	High	High	High	High	High	High	High	High		397622		ARR3	X	regulation of biological process;response to stimulus			Pf00339, Pf02752	0,152	-2,72	26,4	173,6	24,69
FALSK	High	Master Protein	P10745	Retinol-binding protein 3 [OS=Homo sapiens]	FALSK	0	34,40088484	5,212510024	7	42	7	1	1247	135,278	5,11	High	High	High	High	High	High	High	High	High	High	High	High	High	High	High	High	High	High	High	High		5949	ENSG00000265203.1	RBP3	10	metabolic process;transport	extracellular	catalytic activity	Pf03572, Pf11918	0,153	-2,71	26,5	173,5	13,21
FALSK	High	Master Protein	P02547	Neurofilament light polypeptide [OS=Sus scrofa]	FALSK	0	129,9883347	46,44808743	23	212	4	1	549	62,034	4,65	High	High	High	High	High	High	High	High	High	High	High	High	High	High	High	High	High	High	High	High		100521224		NEFL	14	cell organization and biogenesis;cellular component movement;transport		catalytic activity;motor activity;protein binding;structural molecule activity	Pf00038, Pf01576	0,155	-2,69	26,9	173,1	9,82
FALSK	High	Master Protein	P57771-2	Isoform 2 of Regulator of G-protein signaling 8 [OS=Homo sapiens]	FALSK	0,000396275	6,50628995	11,61616162	2	3	2	1	198	22,956	9,23	Not Found	Not Found	Not Found	Not Found	High	High	High	High	High	High	High	High	High	High	High	High	High	High	High	High		85397	ENSG00000135824.12	RGS8	1	regulation of biological process;response to stimulus	cytoplasm;membrane;nucleus	enzyme regulator activity;protein binding	Pf00615	0,158	-2,66	27,3	172,7	13,36
FALSK	High	Master Protein	P07197	Neurofilament medium polypeptide [OS=Homo sapiens]	FALSK	0	96,85194704	26,9650655	23	161	5	1	916	102,411	4,91	High	High	High	High	High	High	High	High	High	High	High	High	High	High	High	High	High	High	High	High		4741	ENSG00000104722.13	NEFM	8	cell organization and biogenesis;metabolic process;regulation of biological process		protein binding;structural molecule activity	Pf00038, Pf02463, Pf04111, Pf07888, Pf07902, Pf10186, Pf10498, Pf12128, Pf13166, Pf13863	0,16	-2,65	27,6	172,4	9,87
FALSK	High	Master Protein	P07196	Neurofilament light polypeptide [OS=Homo sapiens]	FALSK	0	111,765914	44,19889503	21	212	2	1	543	61,479	4,65	High	High	High	High	High	High	High	High	High	High	High	High	High	High	High	High	High	High	High	High		4747	ENSG00000277586.1	NEFL	8	cell organization and biogenesis;cellular component movement;metabolic process;regulation of biological process;response to stimulus;transport	cytoplasm;cytosol	catalytic activity;motor activity;protein binding;structural molecule activity	Pf00038, Pf01576, Pf07889	0,161	-2,63	27,7	172,3	6,29
FALSK	High	Master Protein	P43080	Guanylyl cyclase-activating protein 1 [OS=Homo sapiens]	FALSK	0	11,75260127	15,42288557	2	6	2	1	201	22,905	4,45	High	High	High	High	High	High	High	High	High	High	High	High	High	High	High	High	High	High	High	High		2978	ENSG00000048545.13	GUCA1A	6	metabolic process;regulation of biological process;response to stimulus	membrane	enzyme regulator activity;metal ion binding	Pf00036, Pf13405, Pf13499, Pf13833	0,17	-2,56	29	171	19,32
FALSK	High	Master Protein	P48321	Glutamate decarboxylase 2 [OS=Sus scrofa]	FALSK	0	63,42654659	35,55555556	13	38	13	1	585	65,346	7,02	High	High	High	High	High	High	High	High	High	High	High	High	High	High	High	High	High	High	High	High		396929	ENSSSCG00000011060.2	GAD2	10	metabolic process	cytoplasm;cytosol;Golgi;membrane	catalytic activity	Pf00266, Pf00282, Pf01212	0,175	-2,52	29,7	170,3	17,08
FALSK	High	Master Protein	Q9UK22	F-box only protein 2 [OS=Homo sapiens]	FALSK	0	9,064363918	7,432432432	2	4	2	1	296	33,307	4,37	High	High	High	High	High	High	High	High	High	High	High	High	High	High	High	High	High	High	High	High		26232	ENSG00000116661.9	FBXO2	1	metabolic process;regulation of biological process	cytoplasm;cytosol;endoplasmic reticulum;membrane	catalytic activity;protein binding	Pf04300	0,177	-2,5	30,1	169,9	25,31
FALSK	High	Master Protein	P30531	Sodium- and chloride-dependent GABA transporter 1 [OS=Homo sapiens]	FALSK	0	11,55742626	7,34557596	4	15	4	1	599	67,029	8,09	High	High	High	High	High	High	High	High	High	High	High	High	High	High	High	High	High	High	High	High		6529	ENSG00000157103.10	SLC6A1	3	cell communication;cell organization and biogenesis;regulation of biological process;response to stimulus;transport	cell surface;membrane	metal ion binding;transporter activity	Pf00209	0,177	-2,5	30,1	169,9	21,02
FALSK	High	Master Protein	O14610	Guanine nucleotide-binding protein G(I)/G(S)/G(O) subunit gamma-T2 [OS=Homo sapiens]	FALSK	0,001377158	3,953796297	24,63768116	2	9	1	1	69	7,742	6,68	High	High	High	High	High	High	High	High	High	High	High	High	High	High	High	High	High	High	High	High		2793	ENSG00000167083.6	GNGT2	17	regulation of biological process;response to stimulus	membrane	catalytic activity;signal transducer activity	Pf00631	0,179	-2,49	30,3	169,7	13,7
FALSK	High	Master Protein	Q9Y2J0-1	Rabphilin-3A [OS=Homo sapiens]	FALSK	0	24,48868574	11,3832853	6	14	6	1	694	76,824	8,34	High	High	High	High	High	High	High	High	High	High	High	High	High	High	High	High	High	High	High	High		22895	ENSG00000089169.14	RPH3A	12	cell organization and biogenesis;regulation of biological process;response to stimulus;transport	cytosol;Golgi;membrane	metal ion binding;protein binding	Pf00130, Pf00168, Pf02318	0,184	-2,44	31,1	168,9	40,9
FALSK	High	Master Protein	Q14576	ELAV-like protein 3 [OS=Homo sapiens]	FALSK	0	45,76971562	32,69754768	10	23	4	1	367	39,522	9,28	High	High	High	High	High	High	High	High	High	High	High	High	High	High	High	High	High	High	High	High		1995	ENSG00000196361.9	ELAVL3	19	cell differentiation;development		nucleotide binding;RNA binding	Pf00076, Pf13893, Pf14259	0,185	-2,43	31,2	168,8	23,57
FALSK	High	Master Protein	Q9Y277-2	Isoform 2 of Voltage-dependent anion-selective channel protein 3 [OS=Homo sapiens]	FALSK	0	46,34567724	38,73239437	8	49	1	1	284	30,77	8,66	High	High	High	High	High	Not Found	Not Found	Not Found	Not Found	Not Found	High	High	High	High	High	Not Found	Not Found	Not Found	Not Found	Not Found		7419	ENSG00000078668.13	VDAC3	8	regulation of biological process;transport	membrane;mitochondrion;nucleus	nucleotide binding;transporter activity	Pf01459	0,185	-2,43	31,3	168,7	22,28
FALSK	High	Master Protein	Q96JB8-1	MAGUK p55 subfamily member 4 [OS=Homo sapiens]	FALSK	0	13,41746225	7,064364207	4	10	4	1	637	72,732	5,62	High	High	High	High	High	High	High	High	High	High	High	High	High	High	High	High	High	High	High	High		58538	ENSG00000082126.17	MPP4	2		cytoplasm	protein binding	Pf00018, Pf00595, Pf00625, Pf02828, Pf07653	0,19	-2,4	31,9	168,1	15,34
FALSK	High	Master Protein	P51160	Cone cGMP-specific 3',5'-cyclic phosphodiesterase subunit alpha' [OS=Homo sapiens]	FALSK	0	53,85212898	20,27972028	16	35	14	1	858	99,083	5,72	High	High	High	High	High	High	High	High	High	High	High	High	High	High	High	High	High	High	High	High		5146	ENSG00000095464.9	PDE6C	10	regulation of biological process;response to stimulus	membrane	catalytic activity;metal ion binding;nucleotide binding;protein binding	Pf00233, Pf01590, Pf13185	0,19	-2,4	31,9	168,1	22,38
FALSK	High	Master Protein	Q05193-2	Isoform 2 of Dynamin-1 [OS=Homo sapiens]	FALSK	0	165,3324351	51,38888889	33	181	2	1	864	97,202	6,87	High	High	High	High	High	High	High	High	High	High	High	High	High	High	High	High	High	High	High	High		1759	ENSG00000106976.20	DNM1	9	cell communication;cell organization and biogenesis;metabolic process;regulation of biological process;response to stimulus;transport	Golgi;membrane	catalytic activity;nucleotide binding;protein binding;RNA binding	Pf00169, Pf00350, Pf01031, Pf02212	0,193	-2,37	32,4	167,6	28,34
FALSK	High	Master Protein	Q16143	Beta-synuclein [OS=Homo sapiens]	FALSK	0	50,03830742	51,49253731	7	57	3	1	134	14,279	4,41	High	High	High	High	High	High	High	High	High	High	High	High	High	High	High	High	High	High	High	High		6620	ENSG00000074317.10	SNCB	5	cell communication;cell organization and biogenesis;metabolic process;regulation of biological process	cytoplasm;Golgi;mitochondrion	enzyme regulator activity;metal ion binding;protein binding	Pf01387	0,193	-2,37	32,4	167,6	13,97
FALSK	High	Master Protein	P12036	Neurofilament heavy polypeptide [OS=Homo sapiens]	FALSK	0	60,20810289	15,00974659	14	130	11	1	1026	112,411	6,18	High	High	High	High	High	High	High	High	High	High	High	High	High	High	High	High	High	High	High	High		4744		NEFH	22	cell organization and biogenesis;regulation of biological process;response to stimulus	cytoplasm;mitochondrion;nucleus	protein binding;structural molecule activity	Pf00038, Pf07142	0,198	-2,34	33	167	13,1
FALSK	High	Master Protein	P23942	Peripherin-2 [OS=Homo sapiens]	FALSK	0	24,14593087	15,02890173	6	32	6	1	346	39,161	8,18	High	High	High	High	High	High	High	High	High	High	High	High	High	High	High	High	High	High	High	High		5961		PRPH2	6	regulation of biological process;response to stimulus	membrane		Pf00335	0,198	-2,34	33	167	30,28
FALSK	High	Master Protein	P63211	Guanine nucleotide-binding protein G(T) subunit gamma-T1 [OS=Homo sapiens]	FALSK	0	10,09133976	35,13513514	4	31	3	1	74	8,49	4,82	High	High	High	High	High	High	High	High	High	High	High	High	High	High	High	High	High	High	High	High		2792	ENSG00000127928.12	GNGT1	7	cell death;regulation of biological process;response to stimulus	membrane	catalytic activity;protein binding;signal transducer activity	Pf00631	0,198	-2,34	33,1	166,9	9,21
FALSK	High	Master Protein	P04000	Long-wave-sensitive opsin 1 [OS=Homo sapiens]	FALSK	0	8,593046148	4,395604396	2	14	2	1	364	40,546	8,6	High	High	High	High	High	High	High	High	High	High	High	High	High	High	High	High	High	High	High	High		5956		OPN1LW	X	metabolic process;regulation of biological process;response to stimulus	membrane	receptor activity;signal transducer activity	Pf00001	0,2	-2,32	33,3	166,7	12,51
FALSK	High	Master Protein	O14910	Protein lin-7 homolog A [OS=Homo sapiens]	FALSK	0	22,60310935	22,31759657	5	21	3	1	233	25,981	8,72	High	High	High	High	High	High	High	High	High	High	High	High	High	High	High	High	High	High	High	High		8825	ENSG00000111052.7	LIN7A	12	cell organization and biogenesis;transport	cytosol;membrane	protein binding	Pf00595, Pf02828	0,202	-2,31	33,7	166,3	22,37
FALSK	High	Master Protein	P00506	Aspartate aminotransferase, mitochondrial [OS=Sus scrofa]	FALSK	0	165,9286094	59,30232558	20	332	12	1	430	47,406	9,01	High	High	High	High	High	High	High	High	High	High	High	High	High	High	High	High	High	High	High	High		396968		GOT2	6	metabolic process;transport	membrane;mitochondrion;organelle lumen	catalytic activity	Pf00155	0,203	-2,3	33,7	166,3	13,91
FALSK	High	Master Protein	P17540	Creatine kinase S-type, mitochondrial [OS=Homo sapiens]	FALSK	0	32,31446922	14,79713604	4	82	1	1	419	47,474	8,19	High	High	High	High	High	High	High	High	High	High	High	High	High	High	High	High	High	High	High	High		1160	ENSG00000131730.15	CKMT2	5	metabolic process	membrane;mitochondrion	catalytic activity;nucleotide binding	Pf00217, Pf02807	0,203	-2,3	33,7	166,3	21,23
FALSK	High	Master Protein	Q8IVF2-1	Protein AHNAK2 [OS=Homo sapiens]	FALSK	0	9,934624778	3,244176014	3	9	3	1	5795	616,242	5,36	High	High	High	High	High	High	High	High	High	High	High	High	High	High	High	High	High	High	High	High		113146	ENSG00000185567.6	AHNAK2	14	cell organization and biogenesis	cytoplasm;membrane;nucleus	protein binding		0,211	-2,25	34,8	165,2	19,62
FALSK	High	Master Protein	Q9P2R7	Succinate--CoA ligase [ADP-forming] subunit beta, mitochondrial [OS=Homo sapiens]	FALSK	0	67,20108339	28,50971922	13	64	1	1	463	50,285	7,42	High	High	High	High	High	High	High	High	High	High	High	High	High	High	High	High	High	High	High	High		8803	ENSG00000136143.14	SUCLA2	13	metabolic process	mitochondrion;organelle lumen	catalytic activity;metal ion binding;nucleotide binding;protein binding	Pf00549, Pf01071, Pf02222, Pf08442, Pf13535, Pf13549	0,214	-2,23	35,2	164,8	18,68
FALSK	High	Master Protein	B1AK53-1	espin [OS=Homo sapiens]	FALSK	0	9,002853671	3,512880562	3	6	3	1	854	91,675	6,93	High	High	High	High	High	High	High	High	High	High	High	High	High	High	High	High	High	High	High	High		83715	ENSG00000187017.15	ESPN	1	cell organization and biogenesis;regulation of biological process;response to stimulus	cytoplasm;cytoskeleton	protein binding	Pf00023, Pf02205, Pf12796, Pf13606, Pf13637, Pf13857	0,218	-2,2	35,7	164,3	16,25
FALSK	High	Master Protein	Q3I5G7	Alpha-synuclein [OS=Sus scrofa]	FALSK	0	51,1593148	84,28571429	9	32	6	1	140	14,511	4,65	High	High	High	High	High	High	High	High	High	High	High	High	High	High	High	High	High	High	High	High		641350	ENSSSCG00000009203.2	SNCA	8	cell communication;cell death;cell organization and biogenesis;metabolic process;regulation of biological process;response to stimulus;transport	cytoplasm;cytoskeleton;cytosol;extracellular;membrane;mitochondrion;nucleus	catalytic activity;enzyme regulator activity;metal ion binding;protein binding	Pf01387	0,22	-2,18	36,1	163,9	31,4
FALSK	High	Master Protein	Q8WVH0	Complexin-3 [OS=Homo sapiens]	FALSK	0	35,66982753	32,91139241	5	45	4	1	158	17,546	4,96	High	High	High	High	High	High	High	High	High	High	High	High	High	High	High	High	High	High	High	High		594855	ENSG00000213578.5	CPLX3	15	regulation of biological process;transport	cytosol;membrane	protein binding;transporter activity	Pf05835	0,224	-2,16	36,6	163,4	22,58
FALSK	High	Master Protein	Q7Z7G2	Complexin-4 [OS=Homo sapiens]	FALSK	0	37,95871703	48,75	6	52	5	1	160	18,325	4,61	High	High	High	High	High	High	High	High	High	High	High	High	High	High	High	High	High	High	High	High		339302	ENSG00000166569.8	CPLX4	18	regulation of biological process;transport	membrane	protein binding	Pf05835	0,226	-2,15	36,8	163,2	14,93
FALSK	High	Master Protein	O94925-1	Glutaminase kidney isoform, mitochondrial [OS=Homo sapiens]	FALSK	0	105,8070404	36,77130045	18	66	18	1	669	73,414	7,77	High	High	High	High	High	High	High	High	High	High	High	High	High	High	High	High	High	High	High	High		2744	ENSG00000115419.12	GLS	2	cell communication;cell organization and biogenesis;metabolic process;regulation of biological process;response to stimulus;transport	cytoplasm;cytosol;mitochondrion;organelle lumen	catalytic activity;protein binding	Pf04960, Pf12796	0,226	-2,15	36,9	163,1	12,58
FALSK	High	Master Protein	P11488	Guanine nucleotide-binding protein G(t) subunit alpha-1 [OS=Homo sapiens]	FALSK	0	98,66006897	53,42857143	15	214	11	1	350	40,015	5,62	High	High	High	High	High	High	High	High	High	High	High	High	High	High	High	High	High	High	High	High		2779	ENSG00000114349.9	GNAT1	3	cell proliferation;metabolic process;regulation of biological process;response to stimulus	cytoplasm;cytosol;membrane	catalytic activity;metal ion binding;nucleotide binding;protein binding;signal transducer activity	Pf00025, Pf00503	0,229	-2,13	37,2	162,8	17,22
FALSK	High	Master Protein	P48319	Glutamate decarboxylase 1 [OS=Sus scrofa]	FALSK	0	49,13277589	24,74747475	11	22	11	1	594	66,852	7,17	High	High	High	High	High	High	High	High	High	High	High	High	High	High	High	High	High	High	High	High		396928	ENSSSCG00000022233.1	GAD1	15	metabolic process		catalytic activity	Pf00266, Pf00282, Pf01212	0,23	-2,12	37,5	162,5	26,87
FALSK	High	Master Protein	O94811	Tubulin polymerization-promoting protein [OS=Homo sapiens]	FALSK	0	10,66149681	10,0456621	2	8	2	1	219	23,679	9,44	High	High	High	High	High	High	High	High	High	High	High	High	High	High	High	High	High	High	High	High		11076	ENSG00000171368.11	TPPP	5	cell organization and biogenesis;regulation of biological process	cytoplasm;cytoskeleton;nucleus	protein binding	Pf05517	0,233	-2,1	37,9	162,1	21,03
FALSK	High	Master Protein	O75061-1	putative tyrosine-protein phosphatase auxilin [OS=Homo sapiens]	FALSK	0	48,59545322	14,23877327	10	29	1	1	913	99,933	7,25	High	High	Not Found	Not Found	High	High	High	High	High	High	High	High	High	High	High	High	High	High	High	High		9829	ENSG00000116675.15	DNAJC6	1	cell organization and biogenesis;metabolic process;regulation of biological process;transport	cytosol	catalytic activity;protein binding	Pf00226, Pf10409	0,234	-2,1	37,9	162,1	20,8
FALSK	High	Master Protein	Q9TSV6	V-type proton ATPase subunit G 2 [OS=Sus scrofa]	FALSK	0	23,97643693	50	4	16	4	1	118	13,571	10,26	High	High	High	High	High	High	High	High	High	High	High	High	High	High	High	High	High	High	High	High		100152358	ENSSSCG00000001401.3	ATP6V1G2	7	transport		catalytic activity;transporter activity	Pf03179	0,236	-2,08	38,2	161,8	16,67
FALSK	High	Master Protein	Q14533	Keratin, type II cuticular Hb1 [OS=Homo sapiens]	SAND	0,000396275	4,987265976	4,95049505	3	19	2	1	505	54,893	5,47	High	High	High	High	High	High	High	High	High	High	High	High	High	High	High	High	High	High	High	High		3887	ENSG00000205426.10	KRT81	12	transport		protein binding;structural molecule activity	Pf00038, Pf07888, Pf07926, Pf11559	0,237	-2,08	38,3	161,7	17,82
FALSK	High	Master Protein	Q8IUA7-1	ATP-binding cassette sub-family A member 9 [OS=Homo sapiens]	FALSK	0	7,848179539	1,477832512	2	5	2	1	1624	184,242	6,93	High	High	High	High	High	High	High	High	High	High	High	High	High	High	High	High	High	High	High	High		10350	ENSG00000154258.16	ABCA9	17	transport	membrane;mitochondrion	catalytic activity;nucleotide binding;transporter activity	Pf00005, Pf02653, Pf03193, Pf12698, Pf13304	0,244	-2,03	39,3	160,7	27,26
FALSK	High	Master Protein	Q96E17	ras-related protein Rab-3C [OS=Homo sapiens]	FALSK	0	39,60179589	43,17180617	8	70	4	1	227	25,936	5,24	High	High	High	High	High	High	High	High	High	High	High	High	High	High	High	High	High	High	High	High		115827	ENSG00000152932.7	RAB3C	5	regulation of biological process;response to stimulus;transport	cytosol;membrane	catalytic activity;nucleotide binding;protein binding	Pf00025, Pf00071, Pf08477	0,245	-2,03	39,4	160,6	18,62
FALSK	High	Master Protein	Q5R3F8	Protein phosphatase 1 regulatory subunit 29 [OS=Homo sapiens]	FALSK	0	9,528133525	4,634146341	3	3	3	1	820	89,63	7,62	High	High	High	High	High	Not Found	Not Found	Not Found	Not Found	Not Found	High	High	High	High	High	Not Found	Not Found	Not Found	Not Found	Not Found		114794	ENSG00000166897.14	ELFN2	22	regulation of biological process	membrane	enzyme regulator activity;protein binding	Pf13855	0,248	-2,01	39,8	160,2	6,11
FALSK	High	Master Protein	P23515	Oligodendrocyte-myelin glycoprotein [OS=Homo sapiens]	FALSK	0,000112082	7,078808538	4,772727273	2	5	2	1	440	49,576	7,94	High	High	High	High	High	High	High	High	High	High	High	High	High	High	High	High	High	High	High	High		4974	ENSG00000126861.4	OMG	17	cell organization and biogenesis;regulation of biological process	membrane	protein binding	Pf01462, Pf12799, Pf13855	0,251	-1,99	40,1	159,9	19,71
FALSK	High	Master Protein	Q7Z5L3	Complement C1q-like protein 2 [OS=Homo sapiens]	FALSK	0	12,12407536	13,58885017	3	5	2	1	287	29,449	5,81	High	High	High	High	High	High	High	High	High	High	High	High	High	High	High	High	High	High	High	High		165257	ENSG00000144119.3	C1QL2	2	cell organization and biogenesis	extracellular	protein binding	Pf00386	0,251	-1,99	40,2	159,8	14,19
FALSK	High	Master Protein	Q15835	Rhodopsin kinase [OS=Homo sapiens]	FALSK	0	15,04097164	7,104795737	3	6	3	1	563	63,485	5,87	High	High	High	High	High	High	High	High	High	High	High	High	High	High	High	High	High	High	High	High	Acetyl [N-Term]	6011	ENSG00000185974.6	GRK1	13	metabolic process;regulation of biological process;response to stimulus	membrane	catalytic activity;nucleotide binding	Pf00069, Pf00615, Pf07714, Pf14531	0,253	-1,98	40,4	159,6	16,01
FALSK	High	Master Protein	Q6U841	Sodium-driven chloride bicarbonate exchanger [OS=Homo sapiens]	FALSK	0	60,33477221	14,04293381	13	27	7	1	1118	125,866	6,49	High	High	High	High	High	High	High	High	High	High	High	High	High	High	High	High	High	High	High	High		57282	ENSG00000144290.16	SLC4A10	2	cellular homeostasis;response to stimulus;transport	membrane	transporter activity	Pf00955, Pf07565	0,254	-1,97	40,6	159,4	13,87
FALSK	High	Master Protein	O95057	GTP-binding protein Di-Ras1 [OS=Homo sapiens]	FALSK	0	26,82959118	33,83838384	5	11	4	1	198	22,314	8,72	High	High	High	High	High	High	High	High	High	High	High	High	High	High	High	High	High	High	High	High		148252	ENSG00000176490.4	DIRAS1	19	regulation of biological process;response to stimulus	membrane	catalytic activity;nucleotide binding;protein binding	Pf00071, Pf08477	0,256	-1,96	40,8	159,2	23,5
FALSK	High	Master Protein	P04350	Tubulin beta-4A chain [OS=Homo sapiens]	FALSK	0	262,7472564	73,64864865	24	475	3	1	444	49,554	4,88	High	High	High	High	High	High	High	High	High	High	High	High	High	High	High	High	High	High	High	High		10382	ENSG00000104833.11	TUBB4A	19	cell organization and biogenesis	cytoplasm;cytoskeleton;cytosol;nucleus	catalytic activity;nucleotide binding;protein binding;structural molecule activity	Pf00091, Pf03953, Pf10644	0,257	-1,96	40,9	159,1	20,46
FALSK	High	Master Protein	Q96JE9-1	Microtubule-associated protein 6 [OS=Homo sapiens]	FALSK	0	16,18356456	5,043050431	4	8	4	1	813	86,452	9,16	High	High	High	High	High	High	High	High	High	High	High	High	High	High	High	High	High	High	High	High		4135	ENSG00000171533.11	MAP6	11	cell organization and biogenesis;transport	cytoplasm;cytoskeleton;Golgi	protein binding	Pf05217, Pf05297	0,258	-1,96	41	159	20,96
FALSK	High	Master Protein	Q96HU8	GTP-binding protein Di-Ras2 [OS=Homo sapiens]	FALSK	0	32,23421443	43,71859296	7	17	6	1	199	22,471	8,76	High	High	High	High	High	High	High	High	High	High	High	High	High	High	High	High	High	High	High	High		54769	ENSG00000165023.6	DIRAS2	9	regulation of biological process;response to stimulus	membrane	nucleotide binding	Pf00071, Pf08477	0,258	-1,96	41	159	16,55
FALSK	High	Master Protein	P50150	Guanine nucleotide-binding protein G(I)/G(S)/G(O) subunit gamma-4 [OS=Homo sapiens]	FALSK	0	10,9729466	44	2	7	2	1	75	8,383	7,08	High	High	High	High	High	High	High	High	High	High	High	High	High	High	High	High	High	High	High	High		2786	ENSG00000282972.1; ENSG00000168243.10	GNG4	1; CHR_HSCHR1_5_CTG32_1	regulation of biological process;response to stimulus	membrane	protein binding;signal transducer activity	Pf00631	0,259	-1,95	41,1	158,9	12,1
FALSK	High	Master Protein	Q8NCB2-1	caM kinase-like vesicle-associated protein [OS=Homo sapiens]	FALSK	0	30,56547858	20,75848303	9	18	9	1	501	54,32	5,55	High	High	High	High	High	High	High	High	High	High	High	High	High	High	High	High	High	High	High	High		79012	ENSG00000164076.16	CAMKV	3	metabolic process;regulation of biological process;response to stimulus	membrane	catalytic activity;nucleotide binding;protein binding	Pf00069, Pf05109, Pf07714	0,262	-1,93	41,5	158,5	18,68
FALSK	High	Master Protein	Q29577	Creatine kinase U-type, mitochondrial [OS=Sus scrofa]	FALSK	0	129,6785632	52,64423077	14	233	4	1	416	46,92	8,34	High	High	High	High	High	High	High	High	High	High	High	High	High	High	High	High	High	High	High	High		100519994		LOC100519994; CKMT1B	1	metabolic process	membrane;mitochondrion	catalytic activity;nucleotide binding	Pf00217, Pf02807	0,263	-1,93	41,6	158,4	11,44
FALSK	High	Master Protein	Q17R60	Interphotoreceptor matrix proteoglycan 1 [OS=Homo sapiens]	FALSK	0,000396275	5,965202831	2,383939774	2	12	2	1	797	89,331	4,89	High	High	High	High	High	High	High	High	High	High	High	High	High	High	High	High	High	High	High	High		3617	ENSG00000112706.11	IMPG1	6		extracellular	protein binding;structural molecule activity	Pf01390	0,265	-1,91	41,9	158,1	24,49
FALSK	High	Master Protein	Q16352	alpha-internexin [OS=Homo sapiens]	FALSK	0	50,68565299	27,25450902	13	116	10	1	499	55,357	5,4	High	High	High	High	High	High	High	High	High	High	High	High	High	High	High	High	High	High	High	High		9118	ENSG00000148798.10	INA	10	cell differentiation;cell organization and biogenesis;development	cytoskeleton;membrane	structural molecule activity	Pf00038, Pf04732	0,266	-1,91	42	158	21,08
FALSK	High	Master Protein	P19087	Guanine nucleotide-binding protein G(T) subunit alpha-2 [OS=Homo sapiens]	FALSK	0	40,78519728	22,59887006	7	83	3	1	354	40,15	5,24	High	High	High	High	High	High	High	High	High	High	High	High	High	High	High	High	High	High	High	High		2780	ENSG00000134183.11	GNAT2	1	cellular homeostasis;metabolic process;regulation of biological process;response to stimulus	cytosol;membrane	catalytic activity;metal ion binding;nucleotide binding;protein binding;receptor activity;signal transducer activity	Pf00025, Pf00503	0,267	-1,9	42,2	157,8	17,17
FALSK	High	Master Protein	Q12955	Ankyrin-3 [OS=Homo sapiens]	FALSK	0	41,22579951	3,678318483	12	23	7	1	4377	480,113	6,49	High	High	High	High	High	High	High	High	High	High	High	High	High	High	High	High	High	High	High	High		288	ENSG00000151150.21	ANK3	10	cell organization and biogenesis;cellular component movement;regulation of biological process;response to stimulus;transport	cell surface;cytoplasm;cytoskeleton;cytosol;endoplasmic reticulum;Golgi;membrane;vacuole	protein binding;structural molecule activity	Pf00023, Pf00531, Pf00791, Pf12796, Pf13606, Pf13637, Pf13857	0,269	-1,89	42,4	157,6	21,02
FALSK	High	Master Protein	P62895	cytochrome c [OS=Sus scrofa]	SAND	0	50,34862152	40,95238095	5	33	5	1	105	11,696	9,5	High	High	High	High	High	High	High	High	High	High	High	High	High	High	High	High	High	High	High	High		100170131	ENSSSCG00000016714.2	CYCS	18	cell death;metabolic process;regulation of biological process;transport	mitochondrion	metal ion binding	Pf00034, Pf13442, Pf14495	0,269	-1,89	42,5	157,5	9,91
FALSK	High	Master Protein	O15079-2	Isoform 2 of Syntaphilin [OS=Homo sapiens]	FALSK	0,000396275	5,690018282	3,345724907	2	3	1	1	538	57,954	5,94	High	High	High	High	High	Not Found	Not Found	Not Found	Not Found	Not Found	High	High	High	High	High	Not Found	Not Found	Not Found	Not Found	Not Found		9751	ENSG00000101298.13	SNPH	20	cell differentiation;transport	cytoplasm;membrane	protein binding	Pf03114, Pf03962, Pf04156, Pf12128, Pf13747, Pf15290, Pf15619	0,271	-1,89	42,6	157,4	23,52
FALSK	High	Master Protein	Q9Y6M9	NADH dehydrogenase [ubiquinone] 1 beta subcomplex subunit 9 [OS=Homo sapiens]	FALSK	0,000112082	6,95506348	12,84916201	2	8	2	1	179	21,817	8,38	High	High	High	High	High	High	High	High	High	High	High	High	High	High	High	High	High	High	High	High		4715	ENSG00000147684.7	NDUFB9	8	cell organization and biogenesis;metabolic process;transport	membrane;mitochondrion	catalytic activity;protein binding	Pf05347, Pf13232	0,271	-1,89	42,6	157,4	21,87
FALSK	High	Master Protein	P41566	isocitrate dehydrogenase [NAD] subunit gamma, mitochondrial [OS=Sus scrofa]	FALSK	0	27,74092767	51,88679245	4	21	2	1	106	11,32	4,49	High	High	High	High	High	High	High	High	High	High	High	High	High	High	High	High	High	High	High	High		100525850		LOC100525850; IDH3G	X	metabolic process	mitochondrion	catalytic activity;metal ion binding;nucleotide binding	Pf00180	0,271	-1,88	42,7	157,3	14,59
FALSK	High	Master Protein	O43181	NADH dehydrogenase [ubiquinone] iron-sulfur protein 4, mitochondrial [OS=Homo sapiens]	FALSK	0	10,05384216	14,28571429	2	11	2	1	175	20,095	10,3	High	High	High	High	High	High	High	High	High	High	High	High	High	High	High	High	High	High	High	High		4724	ENSG00000164258.11	NDUFS4	5	cell organization and biogenesis;metabolic process;regulation of biological process;response to stimulus;transport	membrane;mitochondrion	catalytic activity	Pf04800	0,271	-1,88	42,7	157,3	14,53
FALSK	High	Master Protein	Q9BR01	Sulfotransferase 4A1 [OS=Homo sapiens]	FALSK	0	8,725358696	9,507042254	3	5	3	1	284	33,063	5,66	High	High	High	High	High	High	High	High	High	High	High	High	High	High	High	High	High	High	High	High		25830	ENSG00000130540.13	SULT4A1	22	metabolic process	cytoplasm;cytosol	catalytic activity;protein binding	Pf00685	0,273	-1,87	42,9	157,1	11,88
FALSK	High	Master Protein	P61764	Syntaxin-binding protein 1 [OS=Homo sapiens]	FALSK	0	182,7422937	56,22895623	28	206	28	1	594	67,526	6,96	High	High	High	High	High	High	High	High	High	High	High	High	High	High	High	High	High	High	High	High		6812	ENSG00000136854.18	STXBP1	9	cell communication;cell organization and biogenesis;regulation of biological process;transport	cytoplasm;cytosol;membrane;mitochondrion	protein binding;RNA binding	Pf00995	0,273	-1,87	42,9	157,1	12,27
FALSK	High	Master Protein	P17600	Synapsin-1 [OS=Homo sapiens]	FALSK	0	80,31829689	33,33333333	14	39	13	1	705	74,066	9,83	High	High	High	High	High	High	High	High	High	High	High	High	High	High	High	High	High	High	High	High		6853	ENSG00000008056.12	SYN1	X	cell communication;regulation of biological process;transport	cytosol;Golgi;membrane	catalytic activity;nucleotide binding;protein binding;transporter activity	Pf02078, Pf02750, Pf08443, Pf10581	0,273	-1,87	42,9	157,1	13,78
FALSK	High	Master Protein	O00483	Cytochrome c oxidase subunit NDUFA4 [OS=Homo sapiens]	FALSK	0	10,5579694	34,56790123	3	14	3	1	81	9,364	9,38	High	High	High	High	High	High	High	High	High	High	High	High	High	High	High	High	High	High	High	High		4697	ENSG00000189043.9	NDUFA4	7	metabolic process;transport	membrane;mitochondrion	catalytic activity;protein binding;transporter activity	Pf06522	0,275	-1,86	43,1	156,9	8,93
FALSK	High	Master Protein	Q9ULU8-4	Isoform 4 of Calcium-dependent secretion activator 1 [OS=Homo sapiens]	FALSK	0	215,8662703	37,70250368	39	146	39	1	1358	153,353	5,74	High	High	High	High	High	High	High	High	High	High	High	High	High	High	High	High	High	High	High	High	Acetyl [N-Term]								Pf00169, Pf06292	0,276	-1,85	43,3	156,7	8,98
FALSK	High	Master Protein	P62760	Visinin-like protein 1 [OS=Homo sapiens]	FALSK	0	61,85301505	66,4921466	12	54	11	1	191	22,128	5,15	High	High	High	High	High	High	High	High	High	High	High	High	High	High	High	High	High	High	High	High		7447	ENSG00000163032.11	VSNL1	2	regulation of biological process	cytosol;membrane	metal ion binding;protein binding	Pf00036, Pf13202, Pf13405, Pf13499, Pf13833	0,278	-1,85	43,5	156,5	19,76
FALSK	High	Master Protein	Q16795	NADH dehydrogenase [ubiquinone] 1 alpha subcomplex subunit 9, mitochondrial [OS=Homo sapiens]	FALSK	0	9,77257083	7,692307692	2	6	2	1	377	42,483	9,8	High	High	High	High	High	High	High	High	High	High	High	High	High	High	High	High	High	High	High	High		4704	ENSG00000139180.10	NDUFA9	12	cell organization and biogenesis;metabolic process;transport	membrane;mitochondrion;nucleus;organelle lumen	catalytic activity;protein binding	Pf01073, Pf01370, Pf05368	0,279	-1,84	43,6	156,4	11,93
FALSK	High	Master Protein	O15537	Retinoschisin [OS=Homo sapiens]	FALSK	0	41,82988222	34,82142857	7	29	7	1	224	25,576	5,68	High	High	High	High	High	High	High	High	High	High	High	High	High	High	High	High	High	High	High	High		6247	ENSG00000102104.8	RS1	X	development;regulation of biological process;response to stimulus	extracellular		Pf00754	0,279	-1,84	43,7	156,3	16,81
FALSK	High	Master Protein	Q8WP15	Rhodopsin kinase [OS=Sus scrofa]	FALSK	0	45,34590104	25,85895118	11	30	11	1	553	62,259	5,77	High	High	High	High	High	High	High	High	High	High	High	High	High	High	High	High	High	High	High	High		397114	ENSSSCG00000011675.2	GRK7	13	metabolic process;regulation of biological process;response to stimulus	membrane	catalytic activity;nucleotide binding	Pf00069, Pf00615, Pf07714, Pf14531	0,28	-1,84	43,7	156,3	9,71
FALSK	High	Master Protein	P49418	amphiphysin [OS=Homo sapiens]	FALSK	0	65,28801437	27,76978417	16	54	15	1	695	76,21	4,64	High	High	High	High	High	High	High	High	High	High	High	High	High	High	High	High	High	High	High	High		273	ENSG00000078053.16	AMPH	7	cell communication;regulation of biological process;transport	cytoplasm;cytoskeleton;membrane	protein binding	Pf00018, Pf03114, Pf14604	0,282	-1,83	43,9	156,1	11,59
FALSK	High	Master Protein	Q13554-1	Calcium/calmodulin-dependent protein kinase type II subunit beta [OS=Homo sapiens]	FALSK	0	55,77686405	23,57357357	10	45	6	1	666	72,632	7,27	High	High	High	High	High	High	High	High	High	High	High	High	High	High	High	High	High	High	High	High		816	ENSG00000058404.19	CAMK2B	7	cell differentiation;cell organization and biogenesis;development;metabolic process;regulation of biological process;response to stimulus	cytoplasm;cytoskeleton;cytosol;endoplasmic reticulum;membrane	catalytic activity;nucleotide binding;protein binding	Pf00069, Pf07714, Pf08332, Pf12680, Pf13474, Pf14534	0,282	-1,83	44	156	17,5
FALSK	High	Master Protein	O60641-1	Clathrin coat assembly protein AP180 [OS=Homo sapiens]	FALSK	0	69,68222851	18,63285557	14	46	12	1	907	92,444	4,86	High	High	High	High	High	High	High	High	High	High	High	High	High	High	High	High	High	High	High	High		9892	ENSG00000065609.14	SNAP91	6	cell communication;cell organization and biogenesis;regulation of biological process;transport	membrane	protein binding	Pf01417, Pf07651	0,283	-1,82	44,1	155,9	11,29
FALSK	High	Master Protein	O18868	Potassium voltage-gated channel subfamily B member 1 [OS=Sus scrofa]	FALSK	0	29,95655205	10,25641026	6	14	6	1	858	96,057	7,99	High	High	High	High	High	High	High	High	High	High	High	High	High	High	High	High	High	High	High	High		397433		DRK1; KCNB1	17	cell communication;cell organization and biogenesis;cellular homeostasis;regulation of biological process;response to stimulus;transport	membrane	protein binding;transporter activity	Pf00520, Pf02214, Pf03521, Pf07885, Pf08016	0,284	-1,82	44,2	155,8	7,66
FALSK	High	Master Protein	P00346	Malate dehydrogenase, mitochondrial [OS=Sus scrofa]	FALSK	0	133,7453133	63,60946746	17	268	17	1	338	35,572	8,68	High	High	High	High	High	High	High	High	High	High	High	High	High	High	High	High	High	High	High	High		397039		MDH2	3	metabolic process	mitochondrion;organelle lumen	catalytic activity;nucleotide binding	Pf00056, Pf01073, Pf01118, Pf02866, Pf13460	0,286	-1,81	44,5	155,5	11,4
FALSK	High	Master Protein	Q96NR8	Retinol dehydrogenase 12 [OS=Homo sapiens]	FALSK	0	15,81524737	15,50632911	4	8	3	1	316	35,072	9,69	High	High	High	High	High	High	High	High	High	High	High	High	High	High	High	High	High	High	High	High		145226	ENSG00000139988.9	RDH12	14	metabolic process;response to stimulus	membrane	catalytic activity;protein binding	Pf00106, Pf08659, Pf13460	0,286	-1,8	44,5	155,5	16,68
FALSK	High	Master Protein	Q14194-2	Isoform LCRMP-1 of Dihydropyrimidinase-related protein 1 [OS=Homo sapiens]	FALSK	0	102,5874403	32,94460641	16	105	14	1	686	74,216	6,86	High	High	High	High	High	High	High	High	High	High	High	High	High	High	High	High	High	High	High	High		1400	ENSG00000072832.14	CRMP1	4	cell organization and biogenesis;cellular component movement;metabolic process;regulation of biological process	cytoplasm;cytosol	catalytic activity;protein binding	Pf01979, Pf07969, Pf13147, Pf13594	0,288	-1,8	44,7	155,3	17
FALSK	High	Master Protein	Q05639	Elongation factor 1-alpha 2 [OS=Homo sapiens]	FALSK	0	87,10395996	49,67602592	17	248	8	1	463	50,438	9,03	High	High	High	High	High	High	High	High	High	High	High	High	High	High	High	High	High	High	High	High		1917	ENSG00000101210.10	EEF1A2	20	metabolic process;regulation of biological process;response to stimulus	cytoplasm;nucleus	catalytic activity;nucleotide binding;protein binding;RNA binding	Pf00009, Pf03143, Pf03144	0,289	-1,79	44,9	155,1	14,32
FALSK	High	Master Protein	P00505	Aspartate aminotransferase, mitochondrial [OS=Homo sapiens]	FALSK	0	58,15413547	26,51162791	10	169	2	1	430	47,487	9,01	Not Found	Not Found	Not Found	Not Found	Not Found	High	High	High	High	High	Not Found	Not Found	Not Found	Not Found	Not Found	High	High	High	High	High		2806	ENSG00000125166.12	GOT2	16	metabolic process;response to stimulus;transport	cell surface;membrane;mitochondrion;organelle lumen	catalytic activity;protein binding;RNA binding	Pf00155	0,291	-1,78	45	155	29,97
FALSK	High	Master Protein	Q02846	Retinal guanylyl cyclase 1 [OS=Homo sapiens]	FALSK	0	35,53843188	10,15412511	9	24	8	1	1103	119,982	7,44	High	High	High	High	High	High	High	High	High	High	High	High	High	High	High	High	High	High	High	High		3000	ENSG00000132518.6	GUCY2D	17	metabolic process;regulation of biological process;response to stimulus	membrane	catalytic activity;nucleotide binding;protein binding;receptor activity	Pf00069, Pf00211, Pf01094, Pf07701, Pf07714, Pf14531	0,291	-1,78	45	155	14,51
FALSK	High	Master Protein	P36542-1	ATP synthase subunit gamma, mitochondrial [OS=Homo sapiens]	FALSK	0	9,949251959	9,060402685	3	9	3	1	298	32,975	9,22	High	High	High	High	High	High	High	High	High	High	High	High	High	High	High	High	High	High	High	High		509	ENSG00000165629.19	ATP5C1	10	metabolic process;transport	membrane;mitochondrion;organelle lumen	catalytic activity;RNA binding;transporter activity	Pf00231	0,291	-1,78	45,1	154,9	10,11
FALSK	High	Master Protein	Q15124-1	phosphoglucomutase-like protein 5 [OS=Homo sapiens]	FALSK	0	22,22789087	10,93474427	4	8	4	1	567	62,186	7,21	High	High	High	High	High	High	High	High	High	High	High	High	High	High	High	High	High	High	High	High		5239	ENSG00000154330.12	PGM5	9	metabolic process	cytoplasm;cytoskeleton;cytosol;membrane	catalytic activity;metal ion binding;structural molecule activity	Pf02878, Pf02879, Pf02880	0,292	-1,78	45,2	154,8	28,97
FALSK	High	Master Protein	Q7L0J3	Synaptic vesicle glycoprotein 2A [OS=Homo sapiens]	FALSK	0	28,38437542	15,63342318	8	16	8	1	742	82,642	5,57	High	High	High	High	High	High	High	High	High	High	High	High	High	High	High	High	High	High	High	High		9900	ENSG00000159164.9	SV2A	1	cellular homeostasis;transport	cytoplasm;endoplasmic reticulum;membrane	protein binding;receptor activity;transporter activity	Pf00083, Pf07690, Pf13599	0,292	-1,78	45,2	154,8	26,32
FALSK	High	Master Protein	Q9H2X9-2	Isoform 2 of Solute carrier family 12 member 5 [OS=Homo sapiens]	FALSK	0	121,9007946	27,77777778	23	93	19	1	1116	123,431	6,29	High	High	High	High	High	High	High	High	High	High	High	High	High	High	High	High	High	High	High	High	Acetyl [N-Term]	57468	ENSG00000124140.13	SLC12A5	20	cell communication;cellular homeostasis;response to stimulus;transport	membrane	protein binding;transporter activity	Pf00324, Pf13520	0,292	-1,78	45,2	154,8	10,96
FALSK	High	Master Protein	Q06A97	secretagogin [OS=Sus scrofa]	FALSK	0	51,11560803	48,55072464	12	29	12	1	276	31,945	5,24	High	High	High	High	High	High	High	High	High	High	High	High	High	High	High	High	High	High	High	High		768111	ENSSSCG00000001101.2	SCGN	7	cellular homeostasis	cytoplasm;cytosol;extracellular;membrane;nucleus	metal ion binding	Pf13499	0,293	-1,77	45,4	154,6	17,9
FALSK	High	Master Protein	P56471	Isocitrate dehydrogenase [NAD] subunit alpha, mitochondrial [OS=Sus scrofa]	FALSK	0	18,40861778	33,33333333	2	14	1	1	90	9,685	4,77	High	High	High	High	High	High	High	High	High	High	High	High	High	High	High	High	High	High	High	High		100157242		IDH3A	7	metabolic process	mitochondrion	catalytic activity;metal ion binding;nucleotide binding	Pf00180	0,294	-1,77	45,4	154,6	14,43
FALSK	High	Master Protein	Q9UHC6-1	Contactin-associated protein-like 2 [OS=Homo sapiens]	FALSK	0	11,10553282	2,404207363	3	5	3	1	1331	148,073	6,58	High	High	High	High	High	High	High	High	High	High	High	High	High	High	High	High	High	High	High	High		26047	ENSG00000174469.18	CNTNAP2	7	cell organization and biogenesis;response to stimulus	cell surface;endosome;Golgi;membrane	protein binding;structural molecule activity	Pf00008, Pf00054, Pf00754, Pf01410, Pf02210, Pf13385	0,295	-1,76	45,6	154,4	22,6
FALSK	High	Master Protein	O14775	Guanine nucleotide-binding protein subunit beta-5 [OS=Homo sapiens]	FALSK	0	33,75566339	21,51898734	7	23	7	1	395	43,538	6,46	High	High	High	High	High	High	High	High	High	High	High	High	High	High	High	High	High	High	High	High		10681	ENSG00000069966.18	GNB5	15	metabolic process;regulation of biological process;response to stimulus	cytosol;membrane;nucleus	catalytic activity;enzyme regulator activity;protein binding;signal transducer activity	Pf00400	0,296	-1,76	45,6	154,4	13,2
FALSK	High	Master Protein	P35913	Rod cGMP-specific 3',5'-cyclic phosphodiesterase subunit beta [OS=Homo sapiens]	FALSK	0	82,96955819	22,36533958	18	50	11	1	854	98,272	5,24	High	High	High	High	High	High	High	High	High	High	High	High	High	High	High	High	High	High	High	High		5158	ENSG00000133256.12	PDE6B	4	cellular homeostasis;metabolic process;regulation of biological process;response to stimulus	membrane	catalytic activity;metal ion binding;protein binding	Pf00233, Pf01590, Pf13185, Pf13492	0,296	-1,75	45,7	154,3	17,76
FALSK	High	Master Protein	P47736-4	Isoform 4 of Rap1 GTPase-activating protein 1 [OS=Homo sapiens]	FALSK	0	46,4156811	21,45804677	12	19	11	1	727	80,595	6,18	High	High	High	High	High	High	High	High	High	High	High	High	High	High	High	High	High	High	High	High		5909	ENSG00000076864.19	RAP1GAP	1	regulation of biological process;response to stimulus	cytosol;endosome;membrane	catalytic activity;enzyme regulator activity;protein binding	Pf02145, Pf02188	0,298	-1,75	45,9	154,1	11,64
FALSK	High	Master Protein	O75953-5	Isoform 3 of DnaJ homolog subfamily B member 5 [OS=Homo sapiens]	FALSK	0,001553197	3,682337319	3,246753247	2	2	2	1	462	51,657	9,76	Not Found	Not Found	Not Found	Not Found	Not Found	High	High	High	High	High	Not Found	Not Found	Not Found	Not Found	Not Found	High	High	High	High	High		25822	ENSG00000137094.14	DNAJB5	9	metabolic process;regulation of biological process;response to stimulus	cytosol;nucleus	protein binding	Pf00226, Pf01556	0,3	-1,74	46,1	153,9	10,64
FALSK	High	Master Protein	Q4U116-1	Electrogenic sodium bicarbonate cotransporter 1 [OS=Sus scrofa]	FALSK	0	18,15409639	7,136237257	4	9	2	1	1079	121,332	6,87	Not Found	Not Found	Not Found	High	High	High	High	High	High	High	High	High	High	High	High	High	High	High	High	High		503546		SLC4A4	8	cellular homeostasis;transport	membrane	transporter activity	Pf00359, Pf00955, Pf07565	0,3	-1,74	46,1	153,9	7,83
FALSK	High	Master Protein	P50213-1	Isocitrate dehydrogenase [NAD] subunit alpha, mitochondrial [OS=Homo sapiens]	FALSK	0	50,68446231	34,42622951	10	57	9	1	366	39,566	6,92	High	High	High	High	High	High	High	High	High	High	High	High	High	High	High	High	High	High	High	High		3419	ENSG00000166411.13	IDH3A	15	metabolic process	mitochondrion;nucleus;organelle lumen	catalytic activity;metal ion binding;nucleotide binding	Pf00180	0,3	-1,74	46,2	153,8	13,97
FALSK	High	Master Protein	Q7L1I2	Synaptic vesicle glycoprotein 2B [OS=Homo sapiens]	FALSK	0	18,7901526	10,83455344	6	17	5	1	683	77,393	5,44	High	High	High	High	High	High	High	High	High	High	High	High	High	High	High	High	High	High	High	High		9899	ENSG00000185518.11	SV2B	15	transport	membrane	protein binding;transporter activity	Pf00083, Pf07690, Pf13347, Pf13599	0,301	-1,73	46,2	153,8	13,31
FALSK	High	Master Protein	O97580	Succinate--CoA ligase [ADP-forming] subunit beta, mitochondrial [OS=Sus scrofa]	FALSK	0	110,1239467	54,35294118	19	104	6	1	425	46,229	6,46	High	High	High	High	High	High	High	High	High	High	High	High	High	High	High	High	High	High	High	High		399540		SUCLA2	11	metabolic process	mitochondrion	catalytic activity;metal ion binding;nucleotide binding	Pf00549, Pf01071, Pf08442, Pf13549	0,302	-1,73	46,4	153,6	11,36
FALSK	High	Master Protein	P16520	Guanine nucleotide-binding protein G(I)/G(S)/G(T) subunit beta-3 [OS=Homo sapiens]	FALSK	0	46,20832239	28,82352941	6	82	4	1	340	37,197	5,67	High	High	High	High	High	High	High	High	High	High	High	High	High	High	High	High	High	High	High	High		2784	ENSG00000111664.10	GNB3	12	metabolic process;regulation of biological process;response to stimulus	cytosol;membrane	catalytic activity;protein binding;signal transducer activity	Pf00400	0,303	-1,72	46,5	153,5	11,24
FALSK	High	Master Protein	Q96BR5	Cytochrome c oxidase assembly factor 7 [OS=Homo sapiens]	FALSK	0,000396275	5,413243511	8,658008658	2	2	2	1	231	25,692	6,02	High	High	High	High	High	High	High	High	High	High	High	High	High	High	High	High	High	High	High	High		65260	ENSG00000162377.5	SELRC1; COA7	1		mitochondrion	protein binding		0,304	-1,72	46,6	153,4	25,47
FALSK	High	Master Protein	P49802-1	regulator of G-protein signaling 7 [OS=Homo sapiens]	FALSK	0	26,34108599	17,57575758	7	18	5	1	495	57,632	8,21	High	High	High	High	High	High	High	High	High	High	High	High	High	High	High	High	High	High	High	High		6000		RGS7	1	metabolic process;regulation of biological process;response to stimulus	cytoplasm;cytosol;membrane	enzyme regulator activity;protein binding;signal transducer activity	Pf00610, Pf00615, Pf00631	0,308	-1,7	47,1	152,9	9,26
FALSK	High	Master Protein	Q29026	Cell cycle exit and neuronal differentiation protein 1 [OS=Sus scrofa]	FALSK	0	23,18589912	42,85714286	3	8	3	1	140	13,959	9,04	High	High	High	High	High	High	High	High	High	High	High	High	High	High	High	High	High	High	High	High		396876	ENSSSCG00000012845.1	CEND1	2	cell differentiation;cellular component movement;regulation of biological process;response to stimulus	membrane			0,308	-1,7	47,1	152,9	15,48
FALSK	High	Master Protein	Q15700-3	Isoform 3 of Disks large homolog 2 [OS=Homo sapiens]	FALSK	0	57,99388757	21,7623498	11	35	8	1	749	83,353	6,07	High	High	High	High	High	High	High	High	High	High	High	High	High	High	High	High	High	High	High	High		1740	ENSG00000150672.16	DLG2	11	cell communication;cell organization and biogenesis;metabolic process;regulation of biological process	membrane	catalytic activity;protein binding	Pf00018, Pf00595, Pf00625, Pf07653, Pf10600, Pf13180	0,309	-1,69	47,2	152,8	24,2
FALSK	High	Master Protein	Q9Y2I2-3	Netrin-G1 [OS=Homo sapiens]	FALSK	0	12,94412693	7,421150278	3	4	3	1	539	60,501	6,27	High	High	High	High	High	High	High	High	High	High	High	High	High	High	High	High	High	High	High	High		22854	ENSG00000162631.18	NTNG1	1	cell differentiation;cell organization and biogenesis;development	membrane	protein binding	Pf00053, Pf00055	0,312	-1,68	47,5	152,5	27,78
FALSK	High	Master Protein	P05027	Sodium/potassium-transporting ATPase subunit beta-1 [OS=Sus scrofa]	FALSK	0	79,51481065	40,92409241	10	73	10	1	303	35,136	8,53	High	High	High	High	High	High	High	High	High	High	High	High	High	High	High	High	High	High	High	High		396898; 106510095		ATP1B1; LOC106510095	4	cellular homeostasis;transport	membrane	catalytic activity;protein binding;transporter activity	Pf00287	0,312	-1,68	47,6	152,4	13,58
FALSK	High	Master Protein	Q14061	cytochrome C oxidase copper chaperone [OS=Homo sapiens]	FALSK	0,000396275	5,752130682	31,74603175	2	3	2	1	63	6,91	7,24	High	High	High	High	High	High	High	High	High	High	High	High	High	High	High	High	High	High	High	High		10063	ENSG00000138495.6	COX17	3	cell organization and biogenesis;metabolic process;transport	cytoplasm;mitochondrion	metal ion binding;protein binding	Pf05051	0,312	-1,68	47,6	152,4	21,02
FALSK	High	Master Protein	Q02156	Protein kinase C epsilon type [OS=Homo sapiens]	FALSK	0	38,2200406	15,33242877	9	20	8	1	737	83,62	7,12	High	High	High	High	High	High	High	High	High	High	High	High	High	High	High	High	High	High	High	High		5581	ENSG00000171132.13	PRKCE	2	cell death;cell division;cell organization and biogenesis;cellular homeostasis;metabolic process;regulation of biological process;response to stimulus;transport	cytoplasm;cytoskeleton;cytosol;endoplasmic reticulum;Golgi;membrane;mitochondrion;nucleus	catalytic activity;enzyme regulator activity;metal ion binding;nucleotide binding;protein binding;signal transducer activity	Pf00069, Pf00130, Pf00168, Pf00433, Pf07714	0,313	-1,67	47,7	152,3	19,82
FALSK	High	Master Protein	P13637-3	Isoform 3 of Sodium/potassium-transporting ATPase subunit alpha-3 [OS=Homo sapiens]	FALSK	0	360,2271927	58,86939571	49	630	29	1	1026	112,987	5,38	High	High	High	High	High	High	High	High	High	High	High	High	High	High	High	High	High	High	High	High		478	ENSG00000105409.16	ATP1A3	19	cell communication;cellular homeostasis;regulation of biological process;response to stimulus;transport	endoplasmic reticulum;Golgi;membrane;nucleus	catalytic activity;metal ion binding;nucleotide binding;protein binding;transporter activity	Pf00122, Pf00689, Pf00690, Pf00702, Pf08282, Pf12710, Pf13246	0,314	-1,67	47,8	152,2	8,14
FALSK	High	Master Protein	Q9H115	Beta-soluble NSF attachment protein [OS=Homo sapiens]	FALSK	0	71,01603097	44,96644295	11	45	8	1	298	33,535	5,47	High	High	High	High	High	High	High	High	High	High	High	High	High	High	High	High	High	High	High	High		63908	ENSG00000125814.17	NAPB	20	cell organization and biogenesis;transport	membrane	protein binding	Pf14938	0,314	-1,67	47,8	152,2	12,6
FALSK	High	Master Protein	O60268-1	Uncharacterized protein KIAA0513 [OS=Homo sapiens]	FALSK	0	16,45940477	8,759124088	3	5	3	1	411	46,609	5,06	High	High	High	High	High	High	High	High	High	High	High	High	High	High	High	High	High	High	High	High		9764	ENSG00000135709.12	KIAA0513	16		cytoplasm		Pf12335	0,314	-1,67	47,8	152,2	11,21
FALSK	High	Master Protein	O14531	dihydropyrimidinase-related protein 4 [OS=Homo sapiens]	FALSK	0	27,37203884	10,13986014	5	39	5	1	572	61,838	7,09	High	High	High	High	High	High	High	High	High	High	High	High	High	High	High	High	High	High	High	High		10570	ENSG00000151640.12	DPYSL4	10	cell death;cellular component movement	cytoplasm;cytosol	catalytic activity;protein binding	Pf01979, Pf07969, Pf13147, Pf13594	0,315	-1,67	47,9	152,1	19,48
FALSK	High	Master Protein	O43837-1	isocitrate dehydrogenase [NAD] subunit beta, mitochondrial [OS=Homo sapiens]	FALSK	0	46,41162065	30,90909091	10	38	10	1	385	42,157	8,46	High	High	High	High	High	High	High	High	High	High	High	High	High	High	High	High	High	High	High	High		3420	ENSG00000101365.20	IDH3B	20	metabolic process	mitochondrion;nucleus;organelle lumen	catalytic activity;metal ion binding;nucleotide binding	Pf00180	0,316	-1,66	48	152	8,73
FALSK	High	Master Protein	P29762	Cellular retinoic acid-binding protein 1 [OS=Homo sapiens]	FALSK	0	45,32797913	77,37226277	9	61	9	1	137	15,556	5,38	High	High	High	High	High	High	High	High	High	High	High	High	High	High	High	High	High	High	High	High		1381	ENSG00000166426.7	CRABP1	15	development;metabolic process;regulation of biological process;response to stimulus;transport	cytoplasm;cytosol	protein binding;transporter activity	Pf00061, Pf14651	0,316	-1,66	48	152	3,82
FALSK	High	Master Protein	O14880	Microsomal glutathione S-transferase 3 [OS=Homo sapiens]	FALSK	0	20,68847426	9,868421053	2	9	2	1	152	16,506	9,38	High	High	High	High	High	High	High	High	High	High	High	High	High	High	High	High	High	High	High	High		4259	ENSG00000143198.12	MGST3	1	metabolic process;regulation of biological process;response to stimulus	endoplasmic reticulum;membrane	antioxidant activity;catalytic activity;protein binding	Pf01124	0,316	-1,66	48	152	18,17
FALSK	High	Master Protein	P56381	ATP synthase subunit epsilon, mitochondrial [OS=Homo sapiens]	FALSK	0,001439626	3,900464723	29,41176471	2	7	2	1	51	5,776	9,92	High	High	High	High	High	High	High	High	High	High	High	High	High	High	High	High	High	High	High	High		514	ENSG00000124172.9	ATP5E	20	metabolic process;transport	membrane;mitochondrion;organelle lumen	catalytic activity;transporter activity	Pf04627	0,316	-1,66	48,1	151,9	11,24
FALSK	High	Master Protein	O00217	NADH dehydrogenase [ubiquinone] iron-sulfur protein 8, mitochondrial [OS=Homo sapiens]	FALSK	0	8,546461071	13,80952381	3	9	3	1	210	23,69	6,34	High	High	High	High	High	High	High	High	High	High	High	High	High	High	High	High	High	High	High	High		4728	ENSG00000110717.11	NDUFS8	11	cell organization and biogenesis;metabolic process;response to stimulus;transport	membrane;mitochondrion;organelle lumen	catalytic activity;metal ion binding	Pf00037, Pf12837, Pf12838, Pf13183, Pf13187, Pf13237, Pf13459, Pf13484, Pf13534, Pf14697	0,316	-1,66	48,1	151,9	14,81
FALSK	High	Master Protein	P61266	Syntaxin-1B [OS=Homo sapiens]	FALSK	0	67,56081658	41,31944444	12	89	12	1	288	33,224	5,38	High	High	High	High	High	High	High	High	High	High	High	High	High	High	High	High	High	High	High	High		112755	ENSG00000099365.9	STX1B	16	cell organization and biogenesis;regulation of biological process;transport	cytoplasm;cytoskeleton;cytosol;membrane;nucleus	protein binding	Pf00804, Pf05739, Pf13166, Pf14523	0,317	-1,66	48,1	151,9	14,56
FALSK	High	Master Protein	Q16568	Cocaine- and amphetamine-regulated transcript protein [OS=Homo sapiens]	FALSK	0	12,26977993	31,89655172	3	7	3	1	116	12,821	8,25	High	High	High	High	High	High	High	High	High	High	High	High	High	High	High	High	High	High	High	High		9607	ENSG00000164326.4	CARTPT	5	cell communication;cellular homeostasis;regulation of biological process;response to stimulus;transport	extracellular	protein binding	Pf06373	0,317	-1,66	48,1	151,9	27,12
FALSK	High	Master Protein	Q9ULD0	2-oxoglutarate dehydrogenase-like, mitochondrial [OS=Homo sapiens]	FALSK	0	56,13019159	17,02970297	14	36	8	1	1010	114,409	6,65	High	High	High	High	High	High	High	High	High	High	High	High	High	High	High	High	High	High	High	High		55753	ENSG00000197444.9	OGDHL	10	metabolic process	cytosol;mitochondrion;organelle lumen	catalytic activity;metal ion binding;protein binding	Pf00676, Pf02779	0,32	-1,64	48,5	151,5	12,63
FALSK	High	Master Protein	P26378-3	Isoform 3 of ELAV-like protein 4 [OS=Homo sapiens]	FALSK	0	52,80779571	36,5535248	12	25	2	1	383	42,411	9,39	High	High	High	High	High	High	High	High	High	High	High	High	High	High	High	High	High	High	High	High		1996		ELAVL4	1	metabolic process		nucleotide binding;RNA binding	Pf00076, Pf13893, Pf14259	0,321	-1,64	48,6	151,4	21,72
FALSK	High	Master Protein	O95299-2	Isoform 2 of NADH dehydrogenase [ubiquinone] 1 alpha subcomplex subunit 10, mitochondrial [OS=Homo sapiens]	FALSK	0,000396275	6,291136023	4,195804196	2	16	2	1	429	48,532	7,21	High	High	High	High	High	High	High	High	High	High	High	High	High	High	High	High	High	High	High	High		4705	ENSG00000281434.2; ENSG00000130414.11	NDUFA10	2; CHR_HG2233_PATCH	cell organization and biogenesis;metabolic process;response to stimulus	membrane;organelle lumen	catalytic activity	Pf13207	0,322	-1,64	48,7	151,3	12,28
FALSK	High	Master Protein	P00889	citrate synthase, mitochondrial [OS=Sus scrofa]	FALSK	0	108,2583776	49,78448276	18	123	18	1	464	51,596	8,06	High	High	High	High	High	High	High	High	High	High	High	High	High	High	High	High	High	High	High	High		397519		CS	5	metabolic process	mitochondrion;organelle lumen	catalytic activity	Pf00285	0,323	-1,63	48,9	151,1	9,96
FALSK	High	Master Protein	Q9TDR1	NADH-ubiquinone oxidoreductase chain 5 [OS=Sus scrofa]	FALSK	0	24,31891552	13,03630363	8	20	8	1	606	68,603	9	High	High	High	High	High	High	High	High	High	High	High	High	High	High	High	High	High	High	High	High		808511	ENSSSCG00000018091.3	ND5	MT	metabolic process;transport	membrane;mitochondrion	catalytic activity	Pf00361, Pf00662, Pf06455	0,323	-1,63	48,9	151,1	22,58
FALSK	High	Master Protein	Q8TBG9-2	Isoform 2 of Synaptoporin [OS=Homo sapiens]	FALSK	0	21,8765752	16,14035088	4	20	4	1	285	31,309	6,54	High	High	High	High	High	High	High	High	High	High	High	High	High	High	High	High	High	High	High	High	Acetyl [N-Term]	132204	ENSG00000163630.10	SYNPR	3	transport	membrane	protein binding;transporter activity	Pf01284	0,324	-1,63	48,9	151,1	20,27
FALSK	High	Master Protein	Q6QRN9	ADP/ATP translocase 3 [OS=Sus scrofa]	FALSK	0	71,55944991	53,02013423	15	184	2	1	298	32,889	9,8	High	High	High	High	High	High	High	High	High	High	High	High	High	High	High	High	High	High	High	High		403155		SLC25A6		cell death;metabolic process;transport	membrane;mitochondrion	structural molecule activity;transporter activity	Pf00153	0,324	-1,63	48,9	151,1	9,79
FALSK	High	Master Protein	P62873	Guanine nucleotide-binding protein G(I)/G(S)/G(T) subunit beta-1 [OS=Homo sapiens]	FALSK	0	123,7082873	53,52941176	12	238	6	1	340	37,353	6	High	High	High	High	High	High	High	High	High	High	High	High	High	High	High	High	High	High	High	High		2782	ENSG00000078369.17	GNB1	1	cell death;cell organization and biogenesis;cell proliferation;cellular homeostasis;metabolic process;regulation of biological process;response to stimulus	cytosol;membrane	catalytic activity;protein binding;signal transducer activity	Pf00400	0,325	-1,62	49	151	7,31
FALSK	High	Master Protein	P21579	Synaptotagmin-1 [OS=Homo sapiens]	FALSK	0	102,3265485	53,55450237	19	99	14	1	422	47,543	8,12	High	High	High	High	High	High	High	High	High	High	High	High	High	High	High	High	High	High	High	High		6857	ENSG00000067715.13	SYT1	12	cell communication;cell differentiation;cell organization and biogenesis;regulation of biological process;response to stimulus;transport	cytoplasm;cytosol;Golgi;membrane	metal ion binding;protein binding	Pf00168	0,327	-1,61	49,3	150,7	13,98
FALSK	High	Master Protein	O43759-1	Synaptogyrin-1 [OS=Homo sapiens]	FALSK	0	11,72308116	14,59227468	3	15	3	1	233	25,439	4,68	High	High	High	High	High	High	High	High	High	High	High	High	High	High	High	High	High	High	High	High	Acetyl [N-Term]	9145	ENSG00000100321.14	SYNGR1	22	regulation of biological process;transport	membrane	protein binding	Pf01284	0,327	-1,61	49,3	150,7	12,54
FALSK	High	Master Protein	Q9NSB8	Homer protein homolog 2 [OS=Homo sapiens]	FALSK	0	8,967061075	6,214689266	2	3	1	1	354	40,603	6,38	High	High	High	High	High	Not Found	Not Found	Not Found	Not Found	Not Found	High	High	High	High	High	Not Found	Not Found	Not Found	Not Found	Not Found		9455	ENSG00000103942.12	HOMER2	15	regulation of biological process;response to stimulus	cytoplasm;membrane;nucleus	protein binding;structural molecule activity	Pf00568, Pf10234	0,328	-1,61	49,3	150,7	15,62
FALSK	High	Master Protein	P42658	Dipeptidyl aminopeptidase-like protein 6 [OS=Homo sapiens]	FALSK	0,001553197	3,666371549	2,543352601	2	2	1	1	865	97,527	6,37	Not Found	Not Found	Not Found	Not Found	Not Found	High	High	High	High	High	Not Found	Not Found	Not Found	Not Found	Not Found	High	High	High	High	High		1804	ENSG00000282974.1; ENSG00000130226.16	DPP6	7; CHR_HG2239_PATCH	cell organization and biogenesis;metabolic process;regulation of biological process	cell surface;membrane	catalytic activity	Pf00326, Pf00930	0,328	-1,61	49,4	150,6	17,11
FALSK	High	Master Protein	Q13277-1	Syntaxin-3 [OS=Homo sapiens]	FALSK	0	31,32932976	33,9100346	9	40	9	1	289	33,134	5,44	High	High	High	High	High	High	High	High	High	High	High	High	High	High	High	High	High	High	High	High		6809	ENSG00000166900.15	STX3	11	cell organization and biogenesis;regulation of biological process;transport	membrane;vacuole	catalytic activity;protein binding	Pf00804, Pf02485, Pf05739	0,329	-1,61	49,5	150,5	7,33
FALSK	High	Master Protein	Q9UQ90	Paraplegin [OS=Homo sapiens]	FALSK	0	8,973929467	4,779874214	2	4	2	1	795	88,179	8,69	High	High	High	High	High	High	High	High	High	High	High	High	High	High	High	High	High	High	High	High		6687	ENSG00000197912.13	SPG7	16	cell organization and biogenesis;cellular component movement;metabolic process;response to stimulus;transport	membrane;mitochondrion	catalytic activity;metal ion binding;nucleotide binding;protein binding	Pf00004, Pf01078, Pf01434, Pf05496, Pf06068, Pf07724, Pf07728	0,329	-1,61	49,5	150,5	19,23
FALSK	High	Master Protein	A1XQT2	Cytochrome c oxidase subunit 6C [OS=Sus scrofa]	FALSK	0,000396275	5,790117551	28,94736842	3	15	3	1	76	8,795	10,23	High	High	High	High	High	High	High	High	High	High	High	High	High	High	High	High	High	High	High	High		100037989		COX6C	4	transport	membrane;mitochondrion	catalytic activity;transporter activity	Pf02937	0,329	-1,6	49,6	150,4	16,08
FALSK	High	Master Protein	Q14982-4	Isoform 4 of Opioid-binding protein/cell adhesion molecule [OS=Homo sapiens]	FALSK	0	16,41412035	13,84180791	4	8	2	1	354	38,825	6,55	High	High	High	High	High	High	High	High	High	High	High	High	High	High	High	High	High	High	High	High		4978	ENSG00000183715.13	OPCML	11		membrane	protein binding	Pf00047, Pf07679, Pf13895, Pf13927	0,33	-1,6	49,6	150,4	21,7
FALSK	High	Master Protein	Q9H7Z7	Prostaglandin E synthase 2 [OS=Homo sapiens]	FALSK	0	12,34083096	13,26259947	3	5	3	1	377	41,917	9,16	High	High	High	High	High	High	High	High	High	High	High	High	High	High	High	High	High	High	High	High		80142	ENSG00000148334.14	PTGES2	9	cellular homeostasis;metabolic process;regulation of biological process;transport	cytoplasm;cytosol;Golgi;membrane;mitochondrion;nucleus	catalytic activity;DNA binding;protein binding	Pf00043, Pf00462, Pf13409, Pf13410, Pf13417, Pf14497	0,33	-1,6	49,6	150,4	19,53
FALSK	High	Master Protein	P78363	Retinal-specific ATP-binding cassette transporter [OS=Homo sapiens]	FALSK	0	50,15105743	4,795424549	9	23	9	1	2273	255,78	6,29	High	High	High	High	High	High	High	High	High	High	High	High	High	High	High	High	High	High	High	High		24	ENSG00000198691.11	ABCA4	1	cell organization and biogenesis;metabolic process;regulation of biological process;response to stimulus;transport	membrane	catalytic activity;nucleotide binding;transporter activity	Pf00005, Pf12698, Pf13304, Pf13558	0,331	-1,6	49,7	150,3	15,18
FALSK	High	Master Protein	O15354	Prosaposin receptor GPR37 [OS=Homo sapiens]	FALSK	0	13,00095775	9,135399674	3	8	3	1	613	67,07	8,27	High	High	High	High	High	High	High	High	High	High	High	High	High	High	High	High	High	High	High	High		2861	ENSG00000170775.2	GPR37	7	metabolic process;regulation of biological process;response to stimulus	endoplasmic reticulum;membrane	protein binding;receptor activity;signal transducer activity	Pf00001	0,331	-1,59	49,7	150,3	20,25
FALSK	High	Master Protein	P20674	Cytochrome c oxidase subunit 5A, mitochondrial [OS=Homo sapiens]	FALSK	0	9,90277142	35,33333333	3	11	3	1	150	16,752	6,79	High	High	High	High	High	High	High	High	High	High	High	High	High	High	High	High	High	High	High	High		9377	ENSG00000178741.11	COX5A	15	metabolic process;transport	membrane;mitochondrion	catalytic activity;metal ion binding;protein binding;transporter activity	Pf02284	0,332	-1,59	49,9	150,1	23,42
FALSK	High	Master Protein	O79876	Cytochrome c oxidase subunit 1 [OS=Sus scrofa]	FALSK	0	13,21333997	9,338521401	2	3	2	1	514	56,92	6,7	High	High	High	High	High	High	High	High	High	High	High	High	High	High	High	High	High	High	High	High		808503	ENSSSCG00000018075.1	COX1	MT	metabolic process;regulation of biological process;transport	membrane;mitochondrion	catalytic activity;metal ion binding;transporter activity	Pf00115	0,333	-1,59	49,9	150,1	19,66
FALSK	High	Master Protein	Q35915	ATP synthase subunit A [OS=Sus scrofa]	FALSK	0	15,59910365	10,17699115	2	6	2	1	226	25,023	9,99	High	High	High	High	High	High	High	High	High	High	High	High	High	High	High	High	High	High	High	High		808506	ENSSSCG00000018081.1	ATP6	MT	metabolic process;transport	membrane;mitochondrion	catalytic activity;transporter activity	Pf00119	0,333	-1,59	50	150	27,42
FALSK	High	Master Protein	Q13491-4	Isoform 4 of Neuronal membrane glycoprotein M6-b [OS=Homo sapiens]	FALSK	0	43,37744115	25,6097561	8	26	8	1	328	36,196	6,09	High	High	High	High	High	High	High	High	High	High	High	High	High	High	High	High	High	High	High	High	Acetyl [N-Term]	2824	ENSG00000046653.14	GPM6B	X	cell differentiation;cell organization and biogenesis;regulation of biological process;transport	membrane		Pf01275	0,333	-1,58	50	150	14,08
FALSK	High	Master Protein	P20336	Ras-related protein Rab-3A [OS=Homo sapiens]	FALSK	0	72,53562389	52,72727273	9	99	5	1	220	24,968	5,03	High	High	High	High	High	High	High	High	High	High	High	High	High	High	High	High	High	High	High	High		5864	ENSG00000105649.9	RAB3A	19	cell communication;cell organization and biogenesis;regulation of biological process;response to stimulus;transport	cytosol;endosome;membrane	catalytic activity;enzyme regulator activity;nucleotide binding;protein binding	Pf00025, Pf00071, Pf08477, Pf09439	0,334	-1,58	50,1	149,9	14,79
FALSK	High	Master Protein	O14994	Synapsin-3 [OS=Homo sapiens]	FALSK	0,000396275	5,804565587	3,448275862	2	5	2	1	580	63,263	9,39	High	High	High	High	High	High	High	High	High	High	High	High	High	High	High	High	High	High	High	High		8224	ENSG00000185666.14	SYN3	22	regulation of biological process;transport	membrane	catalytic activity;nucleotide binding	Pf02078, Pf02750, Pf08443, Pf10581	0,334	-1,58	50,1	149,9	16,46
FALSK	High	Master Protein	O19069-2	Succinate--CoA ligase [ADP/GDP-forming] subunit alpha, mitochondrial [OS=Sus scrofa]	FALSK	0	60,65741029	37,57225434	9	37	9	1	346	36,094	9,23	High	High	High	High	High	High	High	High	High	High	High	High	High	High	High	High	High	High	High	High		399539		SUCLG1	3	metabolic process	cytosol;mitochondrion;organelle lumen	catalytic activity;nucleotide binding	Pf00549, Pf02629, Pf13607	0,335	-1,58	50,1	149,9	11,68
FALSK	High	Master Protein	P52429	Diacylglycerol kinase epsilon [OS=Homo sapiens]	FALSK	0	28,02007865	16,75485009	6	15	6	1	567	63,885	7,74	High	High	High	High	High	High	High	High	High	High	High	High	High	High	High	High	High	High	High	High		8526	ENSG00000153933.9	DGKE	17	metabolic process;regulation of biological process;response to stimulus	cytoplasm;membrane	catalytic activity;metal ion binding;nucleotide binding	Pf00130, Pf00609, Pf00781	0,335	-1,58	50,1	149,9	13,56
FALSK	High	Master Protein	Q9Y6V0-5	Isoform 5 of Protein piccolo [OS=Homo sapiens]	FALSK	0	15,59428835	1,419681058	5	8	5	1	5142	560,355	6,47	High	High	High	High	High	High	High	High	High	High	High	High	High	High	High	High	High	High	High	High		27445	ENSG00000186472.19	PCLO	7	cell organization and biogenesis;regulation of biological process;response to stimulus;transport	cytoskeleton;cytosol;membrane	metal ion binding;protein binding	Pf00168, Pf00595, Pf05715, Pf09770	0,335	-1,58	50,2	149,8	24,82
FALSK	High	Master Protein	P55944	Metallothionein-3 [OS=Sus scrofa]	FALSK	0	9,693373421	48,52941176	2	6	2	1	68	6,921	4,84	High	High	High	High	High	High	High	High	High	High	High	High	High	High	High	High	High	High	High	High	Acetyl [N-Term]	397123		MT-III	6	cell death;cell organization and biogenesis;cellular homeostasis;metabolic process;regulation of biological process;response to stimulus;transport	nucleus	enzyme regulator activity;metal ion binding		0,336	-1,58	50,2	149,8	23,92
FALSK	High	Master Protein	P10636-9	Isoform Tau-G of Microtubule-associated protein tau [OS=Homo sapiens]	FALSK	0	21,89527819	7,989690722	5	16	2	1	776	80,892	7,08	High	High	High	High	High	High	High	High	High	High	High	High	High	High	High	High	High	High	High	High		4137	ENSG00000186868.15	MAPT	17	cell differentiation;cell growth;cell organization and biogenesis;cellular component movement;regulation of biological process;response to stimulus;transport	cytosol;membrane	protein binding;structural molecule activity	Pf00418	0,336	-1,58	50,3	149,7	19,41
FALSK	High	Master Protein	P48067-1	Sodium- and chloride-dependent glycine transporter 1 [OS=Homo sapiens]	FALSK	0	11,4513931	5,66572238	4	14	4	1	706	78,209	7,93	High	High	High	High	High	High	High	High	High	High	High	High	High	High	High	High	High	High	High	High		6536	ENSG00000196517.11	SLC6A9	1	cell communication;transport	membrane	transporter activity	Pf00209	0,336	-1,57	50,3	149,7	9
FALSK	High	Master Protein	Q92736-2	Isoform 2 of Ryanodine receptor 2 [OS=Homo sapiens]	FALSK	0	13,08485799	1,346733668	5	8	5	1	4975	565,05	6,1	High	High	High	High	High	High	High	High	High	High	High	High	High	High	High	High	High	High	High	High		6262		RYR2	1	cell communication;cell death;cellular homeostasis;regulation of biological process;response to stimulus;transport	endoplasmic reticulum;membrane	metal ion binding;protein binding;transporter activity	Pf00520, Pf00622, Pf01365, Pf02026, Pf02815, Pf06459, Pf08454, Pf08709, Pf13499, Pf14070	0,337	-1,57	50,4	149,6	16,25
FALSK	High	Master Protein	Q96FC7	Phytanoyl-CoA hydroxylase-interacting protein-like [OS=Homo sapiens]	FALSK	0	45,62529593	31,91489362	9	28	9	1	376	42,459	6,42	High	High	High	High	High	High	High	High	High	High	High	High	High	High	High	High	High	High	High	High		84457	ENSG00000165443.11	PHYHIPL	10		cytoplasm;mitochondrion	protein binding	Pf00041	0,338	-1,57	50,5	149,5	18,03
FALSK	High	Master Protein	P28331-2	Isoform 2 of NADH-ubiquinone oxidoreductase 75 kDa subunit, mitochondrial [OS=Homo sapiens]	FALSK	0	85,88708379	26,31578947	16	75	16	1	741	80,945	6,64	High	High	High	High	High	High	High	High	High	High	High	High	High	High	High	High	High	High	High	High		4719	ENSG00000283447.1; ENSG00000023228.13	NDUFS1	2; CHR_HSCHR2_6_CTG7_2	cell organization and biogenesis;metabolic process	mitochondrion;organelle lumen	catalytic activity;metal ion binding;protein binding	Pf00111, Pf00384, Pf09326, Pf10588, Pf13510	0,338	-1,56	50,5	149,5	8,36
FALSK	High	Master Protein	P16276	Aconitate hydratase, mitochondrial [OS=Sus scrofa]	FALSK	0	182,0326144	47,24711908	31	223	31	1	781	85,707	8,05	High	High	High	High	High	High	High	High	High	High	High	High	High	High	High	High	High	High	High	High		396999		ACO2	5	metabolic process	mitochondrion	catalytic activity;metal ion binding	Pf00330, Pf00694	0,339	-1,56	50,6	149,4	7,93
FALSK	High	Master Protein	P24539	ATP synthase F(0) complex subunit B1, mitochondrial [OS=Homo sapiens]	FALSK	0	14,5680802	10,9375	3	28	3	1	256	28,89	9,36	High	High	High	High	High	High	High	High	High	High	High	High	High	High	High	High	High	High	High	High		515	ENSG00000116459.10	ATP5F1	1	metabolic process;transport	membrane;mitochondrion;nucleus;organelle lumen	catalytic activity;protein binding;transporter activity	Pf05405	0,341	-1,55	50,9	149,1	11,43
FALSK	High	Master Protein	P48539	Purkinje cell protein 4 [OS=Homo sapiens]	FALSK	0	17,23927588	41,93548387	2	12	2	1	62	6,787	6,71	High	High	High	High	High	High	High	High	High	High	High	High	High	High	High	High	High	High	High	High		5121	ENSG00000183036.10	PCP4	21	cell differentiation;regulation of biological process;response to stimulus	cytosol;nucleus	protein binding;RNA binding		0,341	-1,55	50,9	149,1	13,24
FALSK	High	Master Protein	Q29259	NADH dehydrogenase [ubiquinone] 1 beta subcomplex subunit 6 [OS=Sus scrofa]	FALSK	0	10,55492962	15,625	3	6	3	1	128	15,378	9,82	High	High	High	High	High	High	High	High	High	High	High	High	High	High	High	High	High	High	High	High		733605		LOC733605; NDUFB6	10	metabolic process;transport	membrane;mitochondrion		Pf09782	0,342	-1,55	51	149	19,59
FALSK	High	Master Protein	Q13432	protein unc-119 homolog A [OS=Homo sapiens]	FALSK	0	42,1144261	31,66666667	5	22	5	1	240	26,945	6,42	High	High	High	High	High	High	High	High	High	High	High	High	High	High	High	High	High	High	High	High		9094	ENSG00000109103.11	UNC119	17	cell communication;regulation of biological process;response to stimulus;transport	cytoplasm;cytoskeleton;cytosol	protein binding	Pf05351	0,343	-1,54	51,1	148,9	11,66
FALSK	High	Master Protein	Q8N573-1	Oxidation resistance protein 1 [OS=Homo sapiens]	FALSK	0	56,64335774	17,96338673	13	31	13	1	874	97,909	5,47	High	High	High	High	High	High	High	High	High	High	High	High	High	High	High	High	High	High	High	High		55074	ENSG00000164830.18	OXR1	8	cell death;metabolic process;regulation of biological process;response to stimulus	mitochondrion	catalytic activity;protein binding	Pf01476, Pf07534	0,344	-1,54	51,1	148,9	13,31
FALSK	High	Master Protein	Q2HWD6	Mast/stem cell growth factor receptor Kit [OS=Sus scrofa]	FALSK	0,000396275	5,079904236	1,851851852	2	7	1	1	972	109,064	6,54	Not Found	Not Found	Not Found	Not Found	Not Found	High	High	High	High	High	Not Found	Not Found	Not Found	Not Found	Not Found	High	High	High	High	High		396810		KIT	8	cell differentiation;cell organization and biogenesis;cellular component movement;defense response;metabolic process;regulation of biological process;response to stimulus;transport	membrane;vacuole	catalytic activity;metal ion binding;nucleotide binding;protein binding;receptor activity;signal transducer activity	Pf00047, Pf00069, Pf07679, Pf07714, Pf13895	0,344	-1,54	51,2	148,8	21,29
FALSK	High	Master Protein	Q99719-1	Septin-5 [OS=Homo sapiens]	FALSK	0	58,78813616	39,83739837	11	40	9	1	369	42,75	6,67	High	High	High	High	High	High	High	High	High	High	High	High	High	High	High	High	High	High	High	High		5413	ENSG00000184702.17	sep-05	22	cell division;regulation of biological process	cytoplasm;cytoskeleton;membrane	catalytic activity;nucleotide binding;protein binding;structural molecule activity	Pf00735, Pf03193	0,345	-1,54	51,3	148,7	14,84
FALSK	High	Master Protein	Q92777-1	Synapsin-2 [OS=Homo sapiens]	FALSK	0	14,00084424	10,48109966	4	9	3	1	582	62,808	8,41	High	High	High	High	High	High	High	High	High	High	High	High	High	High	High	High	High	High	High	High		6854		SYN2	3	cell communication;transport	membrane	catalytic activity;nucleotide binding	Pf02078, Pf02750, Pf10581	0,345	-1,53	51,3	148,7	21,77
FALSK	High	Master Protein	O95182	NADH dehydrogenase [ubiquinone] 1 alpha subcomplex subunit 7 [OS=Homo sapiens]	FALSK	0	9,110308168	23,00884956	3	15	3	1	113	12,544	10,18	High	High	High	High	High	High	High	High	High	High	High	High	High	High	High	High	High	High	High	High		4701	ENSG00000267855.5; ENSG00000167774.2	NDUFA7	19	cell organization and biogenesis;metabolic process;transport	membrane;mitochondrion;ribosome	catalytic activity;structural molecule activity	Pf07347	0,345	-1,53	51,3	148,7	15,92
FALSK	High	Master Protein	Q9UH03-1	Neuronal-specific septin-3 [OS=Homo sapiens]	FALSK	0	21,80017894	19,27374302	6	12	6	1	358	40,678	7,2	High	High	High	High	High	High	High	High	High	High	High	High	High	High	High	High	High	High	High	High		55964	ENSG00000100167.19	sep-03	22	cell division	cytoplasm;cytoskeleton	catalytic activity;nucleotide binding;protein binding	Pf00735, Pf01926, Pf03193	0,346	-1,53	51,4	148,6	12,47
FALSK	High	Master Protein	P43897-2	Isoform 2 of Elongation factor Ts, mitochondrial [OS=Homo sapiens]	FALSK	0,000112082	7,574235814	11,2716763	2	4	2	1	346	37,632	7,72	High	High	High	High	High	High	High	High	High	High	High	High	High	High	High	High	High	High	High	High		10102	ENSG00000123297.17	TSFM	12	metabolic process;regulation of biological process	mitochondrion;nucleus;organelle lumen	RNA binding	Pf00627, Pf00889	0,347	-1,53	51,5	148,5	33,18
FALSK	High	Master Protein	O43236-4	Isoform 4 of Septin-4 [OS=Homo sapiens]	FALSK	0	38,09374244	25,55780933	10	35	7	1	493	56,578	6,55	High	High	High	High	High	High	High	High	High	High	High	High	High	High	High	High	High	High	High	High		5414	ENSG00000108387.14	sep-04	17	cell death;cell division;cell organization and biogenesis;regulation of biological process	cytoskeleton;mitochondrion;nucleus	catalytic activity;nucleotide binding;protein binding;structural molecule activity	Pf00735, Pf03193	0,348	-1,52	51,6	148,4	17,79
FALSK	High	Master Protein	Q8TAC9-2	Isoform 2 of Secretory carrier-associated membrane protein 5 [OS=Homo sapiens]	FALSK	0	14,6120602	8,230452675	2	21	2	1	243	26,833	8,44	High	High	High	High	High	High	High	High	High	High	High	High	High	High	High	High	High	High	High	High		192683	ENSG00000198794.11	SCAMP5	15	regulation of biological process;response to stimulus;transport	membrane	protein binding	Pf04144	0,349	-1,52	51,7	148,3	9,83
FALSK	High	Master Protein	P78559-2	Isoform 2 of Microtubule-associated protein 1A [OS=Homo sapiens]	FALSK	0	122,9416522	12,79857398	28	78	26	1	2805	305,484	4,92	High	High	High	High	High	High	High	High	High	High	High	High	High	High	High	High	High	High	High	High									Pf12072, Pf12128	0,349	-1,52	51,8	148,2	17,99
FALSK	High	Master Protein	P78508	ATP-sensitive inward rectifier potassium channel 10 [OS=Homo sapiens]	FALSK	0	8,881945983	11,60949868	3	4	3	1	379	42,481	8,06	High	High	High	High	High	High	High	High	High	High	High	High	High	High	High	High	High	High	High	High		3766	ENSG00000177807.7	KCNJ10	1	regulation of biological process;response to stimulus;transport	membrane	nucleotide binding;protein binding;transporter activity	Pf01007	0,351	-1,51	51,9	148,1	31,24
FALSK	High	Master Protein	Q9UBS5-1	gamma-aminobutyric acid type B receptor subunit 1 [OS=Homo sapiens]	FALSK	0	9,107546398	3,642039542	3	3	3	1	961	108,252	8,21	High	High	High	High	High	High	High	High	High	High	High	High	High	High	High	High	High	High	High	High		2550	ENSG00000237112.8; ENSG00000204681.10; ENSG00000232632.8; ENSG00000206511.10; ENSG00000206466.10; ENSG00000232569.8	GABBR1	6; CHR_HSCHR6_MHC_DBB_CTG1; CHR_HSCHR6_MHC_COX_CTG1; CHR_HSCHR6_MHC_QBL_CTG1; CHR_HSCHR6_MHC_MCF_CTG1; CHR_HSCHR6_MHC_APD_CTG1	cell differentiation;regulation of biological process;response to stimulus	cytoplasm;extracellular;membrane	protein binding;receptor activity;signal transducer activity	Pf00003, Pf00084, Pf01094, Pf13458	0,351	-1,51	52	148	29,37
FALSK	High	Master Protein	P46459	Vesicle-fusing ATPase [OS=Homo sapiens]	FALSK	0	139,8216387	42,87634409	29	177	28	1	744	82,542	6,95	High	High	High	High	High	High	High	High	High	High	High	High	High	High	High	High	High	High	High	High		4905	ENSG00000073969.18; ENSG00000278174.3; ENSG00000276262.2	NSF	17; CHR_HSCHR17_1_CTG5; CHR_HSCHR17_2_CTG5	cell organization and biogenesis;metabolic process;regulation of biological process;response to stimulus;transport	cytoplasm;cytosol;membrane	catalytic activity;metal ion binding;nucleotide binding;protein binding;RNA binding	Pf00004, Pf00910, Pf01078, Pf02359, Pf02933, Pf05272, Pf05496, Pf06068, Pf07724, Pf07728, Pf13173, Pf13191, Pf13207, Pf13401	0,352	-1,51	52	148	7,72
FALSK	High	Master Protein	Q13825	methylglutaconyl-CoA hydratase, mitochondrial [OS=Homo sapiens]	FALSK	0	19,44770579	18,5840708	5	11	5	1	339	35,586	9,48	High	High	High	High	High	High	High	High	High	High	High	High	High	High	High	High	High	High	High	High		549	ENSG00000148090.11	AUH	9	metabolic process	mitochondrion;organelle lumen	catalytic activity;RNA binding	Pf00378	0,353	-1,5	52,2	147,8	17,87
FALSK	High	Master Protein	P63215	Guanine nucleotide-binding protein G(I)/G(S)/G(O) subunit gamma-3 [OS=Homo sapiens]	FALSK	0	14,5503238	62,66666667	3	9	3	1	75	8,299	7,78	High	High	High	High	High	High	High	High	High	High	High	High	High	High	High	High	High	High	High	High		2785	ENSG00000162188.5	GNG3	11	cellular homeostasis;regulation of biological process;response to stimulus	cytosol;membrane	catalytic activity;protein binding;signal transducer activity	Pf00631	0,353	-1,5	52,2	147,8	39,9
FALSK	High	Master Protein	O14548	Cytochrome c oxidase subunit 7A-related protein, mitochondrial [OS=Homo sapiens]	FALSK	0,000482114	4,850720783	21,05263158	3	10	3	1	114	12,607	9,42	High	High	High	High	High	High	High	High	High	High	High	High	High	High	High	High	High	High	High	High		9167	ENSG00000115944.14	COX7A2L	2	metabolic process;transport	membrane;mitochondrion	catalytic activity;transporter activity	Pf02238	0,354	-1,5	52,3	147,7	12
FALSK	High	Master Protein	P14854	Cytochrome c oxidase subunit 6B1 [OS=Homo sapiens]	FALSK	0	11,5544291	22,09302326	2	15	2	1	86	10,186	7,05	High	High	High	High	High	High	High	High	High	High	High	High	High	High	High	High	High	High	High	High		1340	ENSG00000126267.8	COX6B1	19	metabolic process;transport	membrane;mitochondrion	catalytic activity;transporter activity	Pf02297	0,354	-1,5	52,3	147,7	18,4
FALSK	High	Master Protein	O00154	cytosolic acyl coenzyme A thioester hydrolase [OS=Homo sapiens]	FALSK	0	34,99064506	23,94736842	7	29	7	1	380	41,769	8,54	High	High	High	High	High	High	High	High	High	High	High	High	High	High	High	High	High	High	High	High		11332	ENSG00000097021.19	ACOT7	1	metabolic process	cytoplasm;cytosol;mitochondrion	catalytic activity;protein binding	Pf03061	0,354	-1,5	52,3	147,7	10,14
FALSK	High	Master Protein	P03999	Short-wave-sensitive opsin 1 [OS=Homo sapiens]	FALSK	0,000396275	5,653943503	10,05747126	2	2	2	1	348	39,109	8,57	High	High	High	High	High	High	High	High	High	High	High	High	High	High	High	High	High	High	High	High		611	ENSG00000128617.2	OPN1SW	7	metabolic process;regulation of biological process;response to stimulus	membrane	receptor activity;signal transducer activity	Pf00001, Pf10328	0,355	-1,49	52,4	147,6	24,59
FALSK	High	Master Protein	P80021	ATP synthase subunit alpha, mitochondrial [OS=Sus scrofa]	FALSK	0	198,3680085	64,91862568	32	448	32	1	553	59,651	9,19	High	High	High	High	High	High	High	High	High	High	High	High	High	High	High	High	High	High	High	High		100157880		ATP5A1	1	metabolic process;transport	membrane;mitochondrion	catalytic activity;nucleotide binding;transporter activity	Pf00006, Pf00306, Pf02663, Pf02874, Pf05943	0,356	-1,49	52,5	147,5	6,3
FALSK	High	Master Protein	P12235	ADP/ATP translocase 1 [OS=Homo sapiens]	FALSK	0	69,04563566	52,01342282	14	139	2	1	298	33,043	9,76	High	High	High	High	High	High	High	High	High	High	High	High	High	High	High	High	High	High	High	High		291	ENSG00000151729.10	SLC25A4	4	cell organization and biogenesis;metabolic process;regulation of biological process;transport	membrane;mitochondrion;nucleus	protein binding;structural molecule activity;transporter activity	Pf00153	0,356	-1,49	52,6	147,4	32,14
FALSK	High	Master Protein	P11177	Pyruvate dehydrogenase E1 component subunit beta, mitochondrial [OS=Homo sapiens]	FALSK	0	31,87565167	20,8913649	7	32	7	1	359	39,208	6,65	High	High	High	High	High	High	High	High	High	High	High	High	High	High	High	High	High	High	High	High		5162	ENSG00000168291.12	PDHB	3	metabolic process;regulation of biological process	mitochondrion;nucleus;organelle lumen	catalytic activity;protein binding	Pf02779, Pf02780	0,356	-1,49	52,6	147,4	11,05
FALSK	High	Master Protein	Q9BUE6-2	Isoform 2 of Iron-sulfur cluster assembly 1 homolog, mitochondrial [OS=Homo sapiens]	FALSK	0	8,355476628	14,20454545	2	5	2	1	176	19,276	10,08	High	High	High	High	High	High	High	High	High	High	High	High	High	High	High	High	High	High	High	High		81689		ISCA1	9	cell organization and biogenesis;metabolic process	organelle lumen	metal ion binding;structural molecule activity	Pf01521	0,357	-1,49	52,6	147,4	13,78
FALSK	High	Master Protein	P60953-1	Isoform 1 of Cell division control protein 42 homolog [OS=Homo sapiens]	FALSK	0	43,07596414	63,87434555	9	35	2	1	191	21,297	6,04	High	High	High	High	High	High	High	High	High	High	High	High	High	High	High	High	High	High	High	High		998	ENSG00000070831.15	CDC42	1	cell communication;cell differentiation;cell division;cell organization and biogenesis;cellular component movement;coagulation;metabolic process;regulation of biological process;response to stimulus;transport	cytoplasm;cytosol;membrane;vacuole	catalytic activity;nucleotide binding;protein binding	Pf00025, Pf00071, Pf08477	0,357	-1,49	52,6	147,4	25,58
FALSK	High	Master Protein	Q08209-1	Serine/threonine-protein phosphatase 2B catalytic subunit alpha isoform [OS=Homo sapiens]	FALSK	0	51,80920841	30,51823417	12	41	1	1	521	58,65	5,86	High	High	High	High	High	High	Not Found	Not Found	High	High	High	High	High	High	High	High	High	High	High	High		5530	ENSG00000138814.16	PPP3CA	4	cellular homeostasis;metabolic process;regulation of biological process;response to stimulus;transport	cytoplasm;cytosol;membrane;mitochondrion;nucleus	catalytic activity;metal ion binding;protein binding	Pf00149	0,357	-1,49	52,6	147,4	26,09
FALSK	High	Master Protein	P19367-1	Hexokinase-1 [OS=Homo sapiens]	FALSK	0	145,1043379	29,2257361	22	290	18	1	917	102,42	6,8	High	High	High	High	High	High	High	High	High	High	High	High	High	High	High	High	High	High	High	High	Acetyl [N-Term]	3098	ENSG00000156515.21	HK1	10	cellular homeostasis;metabolic process;transport	cytosol;membrane;mitochondrion	catalytic activity;nucleotide binding;protein binding	Pf00349, Pf03727	0,357	-1,48	52,7	147,3	10,09
FALSK	High	Master Protein	P05141	ADP/ATP translocase 2 [OS=Homo sapiens]	FALSK	0	79,27989026	50,33557047	16	155	4	1	298	32,831	9,69	High	High	High	High	High	High	High	High	High	High	High	High	High	High	High	High	High	High	High	High		292	ENSG00000005022.5	SLC25A5	X	metabolic process;regulation of biological process;transport	membrane;mitochondrion;nucleus	protein binding;RNA binding;structural molecule activity;transporter activity	Pf00153	0,357	-1,48	52,7	147,3	10,28
FALSK	High	Master Protein	P12532	Creatine kinase U-type, mitochondrial [OS=Homo sapiens]	FALSK	0	92,68082541	41,72661871	11	186	1	1	417	47,007	8,34	High	High	High	High	High	High	High	High	High	High	High	High	High	High	High	High	High	High	High	High		1159; 548596	ENSG00000223572.9; ENSG00000237289.9	CKMT1B; CKMT1A	15	metabolic process	membrane;mitochondrion	catalytic activity;nucleotide binding	Pf00217, Pf02807	0,358	-1,48	52,8	147,2	12,77
FALSK	High	Master Protein	P49821	NADH dehydrogenase [ubiquinone] flavoprotein 1, mitochondrial [OS=Homo sapiens]	FALSK	0	70,16350115	38,14655172	11	41	11	1	464	50,785	8,21	High	High	High	High	High	High	High	High	High	High	High	High	High	High	High	High	High	High	High	High		4723	ENSG00000167792.11	NDUFV1	11	cell organization and biogenesis;metabolic process;transport	membrane;mitochondrion	catalytic activity;metal ion binding;nucleotide binding	Pf01512, Pf10531, Pf10589	0,359	-1,48	52,8	147,2	9,75
FALSK	High	Master Protein	P09972	Fructose-bisphosphate aldolase C [OS=Homo sapiens]	FALSK	0	105,3084718	49,72527473	18	194	13	1	364	39,431	6,87	High	High	High	High	High	High	High	High	High	High	High	High	High	High	High	High	High	High	High	High		230	ENSG00000109107.13	ALDOC	17	cell differentiation;metabolic process	cytoskeleton;cytosol;mitochondrion	catalytic activity;protein binding	Pf00274	0,36	-1,48	52,9	147,1	7,78
FALSK	High	Master Protein	Q05193-1	Dynamin-1 [OS=Homo sapiens]	FALSK	0	165,6737312	51,38888889	33	184	2	1	864	97,347	7,17	High	High	High	High	High	High	High	High	High	High	High	High	High	High	High	High	High	High	High	High		1759	ENSG00000106976.20	DNM1	9	cell communication;cell organization and biogenesis;metabolic process;regulation of biological process;response to stimulus;transport	cytoplasm;cytoskeleton;Golgi;membrane	catalytic activity;nucleotide binding;protein binding;RNA binding	Pf00169, Pf00350, Pf01031, Pf02212	0,36	-1,47	52,9	147,1	9,38
FALSK	High	Master Protein	Q9MZ16	voltage-dependent anion-selective channel protein 1 [OS=Sus scrofa]	FALSK	0	146,0735123	77,38515901	17	280	16	1	283	30,708	8,54	High	High	High	High	High	High	High	High	High	High	High	High	High	High	High	High	High	High	High	High		397010	ENSSSCG00000014296.2	VDAC1	2	cell communication;cell death;cell differentiation;defense response;regulation of biological process;response to stimulus;transport	membrane;mitochondrion;nucleus	nucleotide binding;protein binding;transporter activity	Pf01459	0,36	-1,47	52,9	147,1	17,23
FALSK	High	Master Protein	P09471-1	Guanine nucleotide-binding protein G(O) subunit alpha [OS=Homo sapiens]	FALSK	0	93,373261	57,34463277	16	109	14	1	354	40,025	5,53	High	High	High	High	High	High	High	High	High	High	High	High	High	High	High	High	High	High	High	High		2775	ENSG00000087258.13	GNAO1	16	cell organization and biogenesis;metabolic process;regulation of biological process;response to stimulus	membrane	catalytic activity;metal ion binding;nucleotide binding;protein binding;signal transducer activity	Pf00025, Pf00503	0,36	-1,47	52,9	147,1	5,42
FALSK	High	Master Protein	P51970	NADH dehydrogenase [ubiquinone] 1 alpha subcomplex subunit 8 [OS=Homo sapiens]	FALSK	0	8,140314224	12,20930233	2	17	2	1	172	20,092	7,65	High	High	High	High	High	High	High	High	High	High	High	High	High	High	High	High	High	High	High	High		4702	ENSG00000119421.6	NDUFA8	9	cell organization and biogenesis;metabolic process;transport	membrane;mitochondrion	catalytic activity;protein binding	Pf06747	0,361	-1,47	53	147	21,38
FALSK	High	Master Protein	O95563	Mitochondrial pyruvate carrier 2 [OS=Homo sapiens]	FALSK	0,000396275	5,644021019	22,04724409	2	3	2	1	127	14,27	10,43	High	High	High	High	High	High	High	High	High	High	High	High	High	High	High	High	High	High	High	High		25874	ENSG00000143158.10	MPC2	1	regulation of biological process;transport	membrane;mitochondrion;nucleus	transporter activity	Pf03650	0,361	-1,47	53	147	8,51
FALSK	High	Master Protein	Q9BZC1-1	CUGBP Elav-like family member 4 [OS=Homo sapiens]	FALSK	0	12,66386568	7,613168724	4	7	4	1	486	51,932	8	High	High	High	High	High	High	High	High	High	High	High	High	High	High	High	High	High	High	High	High		56853	ENSG00000101489.19	CELF4	18	cell organization and biogenesis;metabolic process;regulation of biological process	cytoplasm;nucleus	nucleotide binding;RNA binding;translation regulator activity	Pf00076, Pf13893, Pf14259	0,361	-1,47	53,1	146,9	20,71
FALSK	High	Master Protein	P19404	NADH dehydrogenase [ubiquinone] flavoprotein 2, mitochondrial [OS=Homo sapiens]	FALSK	0	64,20050546	46,58634538	10	47	10	1	249	27,374	8,06	High	High	High	High	High	High	High	High	High	High	High	High	High	High	High	High	High	High	High	High		4729	ENSG00000178127.12	NDUFV2	18	cell organization and biogenesis;metabolic process;transport	membrane;mitochondrion	catalytic activity;metal ion binding	Pf01257	0,361	-1,47	53,1	146,9	8,19
FALSK	High	Master Protein	Q9P0J0-2	Isoform 2 of NADH dehydrogenase [ubiquinone] 1 alpha subcomplex subunit 13 [OS=Homo sapiens]	FALSK	0	26,9664948	16,66666667	4	26	4	1	222	24,866	9,7	High	High	High	High	High	High	High	High	High	High	High	High	High	High	High	High	High	High	High	High									Pf06212	0,361	-1,47	53,1	146,9	19,64
FALSK	High	Master Protein	Q9BPW8	Protein NipSnap homolog 1 [OS=Homo sapiens]	FALSK	0	29,27164746	17,95774648	5	19	4	1	284	33,289	9,31	High	High	High	High	High	High	High	High	High	High	High	High	High	High	High	High	High	High	High	High		8508	ENSG00000184117.11	NIPSNAP1	22		membrane;mitochondrion	protein binding	Pf07978	0,361	-1,47	53,1	146,9	27,19
FALSK	High	Master Protein	Q7L099-3	Isoform 3 of Protein RUFY3 [OS=Homo sapiens]	FALSK	0	50,77304297	26,29032258	13	30	13	1	620	70,565	5,72	High	High	High	High	High	High	High	High	High	High	High	High	High	High	High	High	High	High	High	High		22902	ENSG00000018189.12	RUFY3	4	cell organization and biogenesis;regulation of biological process	cytoplasm;cytoskeleton;membrane	catalytic activity;metal ion binding;motor activity;protein binding	Pf01363, Pf01576, Pf02463, Pf02759, Pf06160, Pf09726, Pf09731, Pf13514	0,362	-1,47	53,1	146,9	17,08
FALSK	High	Master Protein	O43426	Synaptojanin-1 [OS=Homo sapiens]	FALSK	0	81,86577941	13,47743166	19	47	19	1	1573	172,995	7,42	High	High	High	High	High	High	High	High	High	High	High	High	High	High	High	High	High	High	High	High		8867		SYNJ1	21	cell organization and biogenesis;metabolic process;response to stimulus;transport	cytoplasm;cytosol;membrane	catalytic activity;nucleotide binding;RNA binding	Pf02383, Pf03372, Pf08952	0,362	-1,47	53,2	146,8	5,68
FALSK	High	Master Protein	P00503	Aspartate aminotransferase, cytoplasmic [OS=Sus scrofa]	FALSK	0	106,5222673	68,52300242	22	141	22	1	413	46,446	7,2	High	High	High	High	High	High	High	High	High	High	High	High	High	High	High	High	High	High	High	High	Acetyl [N-Term]	396967	ENSSSCG00000010537.2	GOT1	14	metabolic process;regulation of biological process;response to stimulus	cytoplasm;cytosol;mitochondrion;nucleus	catalytic activity;protein binding	Pf00155	0,362	-1,46	53,2	146,8	4,24
FALSK	High	Master Protein	P31937	3-hydroxyisobutyrate dehydrogenase, mitochondrial [OS=Homo sapiens]	FALSK	0	34,33971092	16,96428571	4	15	4	1	336	35,306	8,13	High	High	High	High	High	High	High	High	High	High	High	High	High	High	High	High	High	High	High	High		11112	ENSG00000106049.8	HIBADH	7	metabolic process;transport	mitochondrion;organelle lumen	catalytic activity;nucleotide binding	Pf02254, Pf02826, Pf03446, Pf03807, Pf14833	0,363	-1,46	53,2	146,8	27,47
FALSK	High	Master Protein	Q9UI15	Transgelin-3 [OS=Homo sapiens]	FALSK	0	70,53114187	62,81407035	10	54	9	1	199	22,458	7,33	High	High	High	High	High	High	High	High	High	High	High	High	High	High	High	High	High	High	High	High		29114	ENSG00000144834.13	TAGLN3	3	regulation of biological process	nucleus	protein binding	Pf00307, Pf00402	0,364	-1,46	53,3	146,7	20,65
FALSK	High	Master Protein	Q9BY11	Protein kinase C and casein kinase substrate in neurons protein 1 [OS=Homo sapiens]	FALSK	0	65,87436299	34,23423423	12	58	11	1	444	50,934	5,24	High	High	High	High	High	High	High	High	High	High	High	High	High	High	High	High	High	High	High	High		29993	ENSG00000124507.10	PACSIN1	6	cell organization and biogenesis;metabolic process;regulation of biological process;transport	cytoplasm;cytosol;endosome;membrane	catalytic activity;protein binding	Pf00018, Pf00611, Pf07653, Pf14604	0,364	-1,46	53,4	146,6	14,64
FALSK	High	Master Protein	P13618	ATP synthase-coupling factor 6, mitochondrial [OS=Sus scrofa]	FALSK	0	46,00694421	75	8	39	8	1	76	8,924	5,52	High	High	High	High	High	High	High	High	High	High	High	High	High	High	High	High	High	High	High	High		100622245		LOC100622245; ATP5J	13	metabolic process;transport	membrane;mitochondrion	transporter activity	Pf05511	0,364	-1,46	53,4	146,6	7,41
FALSK	High	Master Protein	O75306-1	NADH dehydrogenase [ubiquinone] iron-sulfur protein 2, mitochondrial [OS=Homo sapiens]	FALSK	0	27,60511586	20,30237581	7	34	7	1	463	52,512	7,55	High	High	High	High	High	High	High	High	High	High	High	High	High	High	High	High	High	High	High	High		4720	ENSG00000158864.12	NDUFS2	1	cell organization and biogenesis;metabolic process;response to stimulus;transport	membrane;mitochondrion;organelle lumen	catalytic activity;metal ion binding;nucleotide binding;protein binding	Pf00346	0,366	-1,45	53,6	146,4	9,73
FALSK	High	Master Protein	O95831-1	Apoptosis-inducing factor 1, mitochondrial [OS=Homo sapiens]	FALSK	0	74,74725091	23,00163132	10	44	10	1	613	66,859	8,95	High	High	High	High	High	High	High	High	High	High	High	High	High	High	High	High	High	High	High	High		9131	ENSG00000156709.13	AIFM1	X	cell death;cell differentiation;cell organization and biogenesis;cellular homeostasis;metabolic process;regulation of biological process;response to stimulus	cytoplasm;cytosol;membrane;mitochondrion;nucleus	catalytic activity;DNA binding;nucleotide binding;protein binding	Pf00070, Pf07992, Pf14721, Pf14962	0,366	-1,45	53,6	146,4	15,67
FALSK	High	Master Protein	Q765P7	MTSS1-like protein [OS=Homo sapiens]	FALSK	0	9,010717525	3,212851406	2	3	2	1	747	79,88	7,47	High	High	High	High	High	High	High	High	High	High	High	High	High	High	High	High	High	High	High	High		92154	ENSG00000132613.14	MTSS1L	16	cell organization and biogenesis	cytoplasm;cytoskeleton;membrane	protein binding	Pf08397	0,366	-1,45	53,6	146,4	15,4
FALSK	High	Master Protein	P06576	ATP synthase subunit beta, mitochondrial [OS=Homo sapiens]	FALSK	0	254,2694096	67,48582231	23	335	23	1	529	56,525	5,4	High	High	High	High	High	High	High	High	High	High	High	High	High	High	High	High	High	High	High	High		506	ENSG00000110955.8	ATP5B	12	cell differentiation;cell organization and biogenesis;cellular homeostasis;metabolic process;regulation of biological process;transport	cell surface;membrane;mitochondrion;nucleus;organelle lumen	catalytic activity;nucleotide binding;protein binding;transporter activity	Pf00006, Pf00306, Pf02874	0,366	-1,45	53,6	146,4	9,59
FALSK	High	Master Protein	P28472-1	Gamma-aminobutyric acid receptor subunit beta-3 [OS=Homo sapiens]	FALSK	0	14,4237015	9,936575053	4	7	2	1	473	54,081	9,11	High	High	High	High	High	High	High	High	High	High	High	High	High	High	High	High	High	High	High	High		2562	ENSG00000166206.14	GABRB3	15	regulation of biological process;response to stimulus;transport	membrane	receptor activity;signal transducer activity;transporter activity	Pf02931, Pf02932	0,368	-1,44	53,8	146,2	27,08
FALSK	High	Master Protein	O75489	NADH dehydrogenase [ubiquinone] iron-sulfur protein 3, mitochondrial [OS=Homo sapiens]	FALSK	0	28,36181411	24,62121212	5	24	5	1	264	30,223	7,5	High	High	High	High	High	High	High	High	High	High	High	High	High	High	High	High	High	High	High	High		4722	ENSG00000213619.9	NDUFS3	11	cell organization and biogenesis;metabolic process;regulation of biological process;transport	membrane;mitochondrion;nucleus;organelle lumen	catalytic activity;protein binding	Pf00329	0,368	-1,44	53,8	146,2	10,47
FALSK	High	Master Protein	Q12860	Contactin-1 [OS=Homo sapiens]	FALSK	0	58,92775057	18,36935167	14	33	14	1	1018	113,249	5,9	High	High	High	High	High	High	High	High	High	High	High	High	High	High	High	High	High	High	High	High		1272	ENSG00000018236.14	CNTN1	12	cell organization and biogenesis;regulation of biological process;response to stimulus	membrane	protein binding	Pf00041, Pf00047, Pf07679, Pf07686, Pf13895, Pf13927	0,37	-1,43	54,1	145,9	8,82
FALSK	High	Master Protein	O79874	NADH-ubiquinone oxidoreductase chain 1 [OS=Sus scrofa]	FALSK	0,000112082	7,208932813	11,63522013	3	4	3	1	318	35,624	7,55	High	High	High	High	High	High	High	High	High	High	High	High	High	High	High	High	High	High	High	High						metabolic process;transport	membrane;mitochondrion	catalytic activity	Pf00146	0,371	-1,43	54,1	145,9	11,77
FALSK	High	Master Protein	P35749	Myosin-11 [OS=Homo sapiens]	FALSK	0	117,9210374	12,88032454	23	76	8	1	1972	227,199	5,5	High	High	High	High	High	High	High	High	High	High	High	High	High	High	High	High	High	High	High	High		4629	ENSG00000133392.17; ENSG00000276480.5	MYH11	16; CHR_HSCHR16_1_CTG1	cell organization and biogenesis;metabolic process;transport	cytoskeleton;cytosol;extracellular	catalytic activity;motor activity;nucleotide binding;protein binding;structural molecule activity	Pf00038, Pf00063, Pf01442, Pf01576, Pf02463, Pf02736, Pf04111, Pf04156, Pf05622, Pf06160, Pf07888, Pf09311, Pf09726, Pf09731, Pf10079, Pf12128, Pf12252, Pf12325, Pf13166	0,371	-1,43	54,1	145,9	15,52
FALSK	High	Master Protein	O43301	Heat shock 70 kDa protein 12A [OS=Homo sapiens]	FALSK	0	130,7687492	40,88888889	23	69	23	1	675	74,931	6,77	High	High	High	High	High	High	High	High	High	High	High	High	High	High	High	High	High	High	High	High		259217	ENSG00000165868.13	HSPA12A	10			nucleotide binding	Pf00012	0,371	-1,43	54,2	145,8	13,6
FALSK	High	Master Protein	Q9H936	Mitochondrial glutamate carrier 1 [OS=Homo sapiens]	FALSK	0	37,91841947	32,19814241	8	31	8	1	323	34,448	9,29	High	High	High	High	High	High	High	High	High	High	High	High	High	High	High	High	High	High	High	High		79751	ENSG00000177542.10	SLC25A22	11	metabolic process;transport	membrane;mitochondrion	structural molecule activity;transporter activity	Pf00153	0,371	-1,43	54,2	145,8	9,72
FALSK	High	Master Protein	P13222	Choline O-acetyltransferase [OS=Sus scrofa]	FALSK	0	11,95691056	7,332293292	4	5	4	1	641	71,684	7,52	High	High	High	High	High	High	High	High	High	High	High	High	High	High	High	High	High	High	High	High		396896	ENSSSCG00000010392.1	CHAT	14	metabolic process		catalytic activity	Pf00755	0,372	-1,43	54,2	145,8	8,7
FALSK	High	Master Protein	Q5S3G4	Cytochrome c oxidase subunit 5B, mitochondrial [OS=Sus scrofa]	FALSK	0	22,82153911	33,33333333	3	50	3	1	129	13,774	8,51	High	High	High	High	High	High	High	High	High	High	High	High	High	High	High	High	High	High	High	High		492822	ENSSSCG00000008195.2	COX5B	3	metabolic process;transport	membrane;mitochondrion	catalytic activity;metal ion binding;transporter activity	Pf01215	0,373	-1,42	54,3	145,7	14,57
FALSK	High	Master Protein	P22695	Cytochrome b-c1 complex subunit 2, mitochondrial [OS=Homo sapiens]	FALSK	0	28,95576849	14,12803532	5	20	5	1	453	48,413	8,63	High	High	High	High	High	High	High	High	High	High	High	High	High	High	High	High	High	High	High	High		7385	ENSG00000140740.10	UQCRC2	16	metabolic process;transport	membrane;mitochondrion	catalytic activity;metal ion binding;protein binding	Pf00675, Pf05193	0,373	-1,42	54,3	145,7	8,75
FALSK	High	Master Protein	D2WKD8	Sodium/potassium-transporting ATPase subunit alpha-2 [OS=Sus scrofa]	FALSK	0	235,4156335	39,11764706	36	370	17	1	1020	112,137	5,66	High	High	High	High	High	High	High	High	High	High	High	High	High	High	High	High	High	High	High	High		396828	ENSSSCG00000006391.2	ATP1A2	4	cellular homeostasis;metabolic process;regulation of biological process;response to stimulus;transport	cytoplasm;cytosol;membrane	catalytic activity;metal ion binding;nucleotide binding;protein binding;transporter activity	Pf00122, Pf00689, Pf00690, Pf00702, Pf08282, Pf12710, Pf13246	0,373	-1,42	54,3	145,7	12,72
FALSK	High	Master Protein	P51649-2	Isoform 2 of Succinate-semialdehyde dehydrogenase, mitochondrial [OS=Homo sapiens]	FALSK	0	17,55257422	10,58394161	4	12	4	1	548	58,616	8,09	High	High	High	High	High	High	High	High	High	High	High	High	High	High	High	High	High	High	High	High		7915	ENSG00000112294.12	ALDH5A1	6	cell organization and biogenesis;metabolic process	mitochondrion;organelle lumen	catalytic activity;nucleotide binding;protein binding	Pf00171	0,374	-1,42	54,4	145,6	17,8
FALSK	High	Master Protein	Q8NI60-1	Atypical kinase COQ8A, mitochondrial [OS=Homo sapiens]	FALSK	0,000482114	4,719322582	3,091190108	2	2	2	1	647	71,904	6,99	High	High	High	High	High	Not Found	Not Found	Not Found	Not Found	Not Found	High	High	High	High	High	Not Found	Not Found	Not Found	Not Found	Not Found		56997	ENSG00000163050.16	ADCK3	1	metabolic process	membrane;mitochondrion	catalytic activity;nucleotide binding;protein binding	Pf03109	0,374	-1,42	54,4	145,6	10,45
FALSK	High	Master Protein	Q8N336	ELMO domain-containing protein 1 [OS=Homo sapiens]	FALSK	0	8,988688751	8,383233533	3	6	3	1	334	39,026	8,51	High	High	High	High	High	High	High	High	High	High	High	High	High	High	High	High	High	High	High	High		55531	ENSG00000110675.12	ELMOD1	11	regulation of biological process	cytoplasm	enzyme regulator activity	Pf04727	0,374	-1,42	54,5	145,5	17,1
FALSK	High	Master Protein	P31006	guanylate kinase [OS=Sus scrofa]	FALSK	0	52,95493186	52,52525253	9	44	9	1	198	21,907	6,95	High	High	High	High	High	High	High	High	High	High	High	High	High	High	High	High	High	High	High	High		100513720		LOC100513720; GUK1	2	metabolic process	cytosol	catalytic activity;nucleotide binding	Pf00005, Pf00625, Pf01926, Pf03193, Pf05729, Pf06414, Pf13173, Pf13191, Pf13207, Pf13238, Pf13401, Pf13555, Pf13671	0,375	-1,41	54,6	145,4	11,22
FALSK	High	Master Protein	P47869-2	Isoform 2 of Gamma-aminobutyric acid receptor subunit alpha-2 [OS=Homo sapiens]	FALSK	0,000112082	7,602852154	4,605263158	2	3	1	1	456	52,031	9,22	High	High	High	High	High	Not Found	Not Found	Not Found	Not Found	Not Found	High	High	High	High	High	Not Found	Not Found	Not Found	Not Found	Not Found		2555		GABRA2	4	regulation of biological process;response to stimulus;transport	membrane	receptor activity;signal transducer activity;transporter activity	Pf02931, Pf02932	0,376	-1,41	54,6	145,4	18,49
FALSK	High	Master Protein	Q8N4C8-3	Isoform 2 of Misshapen-like kinase 1 [OS=Homo sapiens]	FALSK	0	13,17988925	3,760552571	4	7	1	1	1303	146,62	7,46	Not Found	Not Found	Not Found	Not Found	Not Found	High	High	High	High	High	Not Found	Not Found	Not Found	Not Found	Not Found	High	High	High	High	High		50488	ENSG00000141503.15	MINK1	17	cell communication;cell organization and biogenesis;development;metabolic process;regulation of biological process;response to stimulus	cytoplasm;cytosol;Golgi	catalytic activity;nucleotide binding;protein binding;signal transducer activity	Pf00069, Pf00780, Pf07714, Pf14531	0,376	-1,41	54,6	145,4	29,08
FALSK	High	Master Protein	Q9Y4C0	Neurexin-3 [OS=Homo sapiens]	FALSK	0	60,394993	10,95556908	14	23	11	1	1643	180,484	5,54	High	High	High	High	High	High	High	High	High	High	High	High	High	High	High	High	High	High	High	High		9369		NRXN3	14	cell communication;cell organization and biogenesis;cellular component movement;regulation of biological process;response to stimulus;transport	membrane	metal ion binding;protein binding;receptor activity;signal transducer activity	Pf00008, Pf00054, Pf02210, Pf13385	0,376	-1,41	54,7	145,3	11,58
FALSK	High	Master Protein	O75947-1	ATP synthase subunit d, mitochondrial [OS=Homo sapiens]	FALSK	0,000396275	6,156480757	6,211180124	2	17	2	1	161	18,479	5,3	High	High	High	High	High	High	High	High	High	High	High	High	High	High	High	High	High	High	High	High		10476	ENSG00000167863.11	ATP5H	17	metabolic process;transport	cytoplasm;membrane;mitochondrion	catalytic activity;transporter activity	Pf05873	0,376	-1,41	54,7	145,3	30,9
FALSK	High	Master Protein	O75746	Calcium-binding mitochondrial carrier protein Aralar1 [OS=Homo sapiens]	FALSK	0	120,780982	45,72271386	24	97	18	1	678	74,715	8,38	High	High	High	High	High	High	High	High	High	High	High	High	High	High	High	High	High	High	High	High		8604	ENSG00000115840.13	SLC25A12	2	metabolic process;response to stimulus;transport	membrane;mitochondrion	metal ion binding;structural molecule activity;transporter activity	Pf00153, Pf13499	0,377	-1,41	54,7	145,3	7,66
FALSK	High	Master Protein	Q9H2H9	Sodium-coupled neutral amino acid transporter 1 [OS=Homo sapiens]	FALSK	0	9,932395485	5,544147844	3	6	3	1	487	54,012	7,02	High	High	High	High	High	High	High	High	High	High	High	High	High	High	High	High	High	High	High	High		81539	ENSG00000111371.15	SLC38A1	12	transport	membrane	protein binding;transporter activity	Pf01490	0,377	-1,41	54,8	145,2	12,17
FALSK	High	Master Protein	P10515	Dihydrolipoyllysine-residue acetyltransferase component of pyruvate dehydrogenase complex, mitochondrial [OS=Homo sapiens]	FALSK	0	48,54124347	15,91962906	8	26	8	1	647	68,953	7,84	High	High	High	High	High	High	High	High	High	High	High	High	High	High	High	High	High	High	High	High		1737	ENSG00000150768.15	DLAT	11	metabolic process;regulation of biological process	mitochondrion;organelle lumen	catalytic activity;protein binding	Pf00198, Pf00364, Pf02817	0,379	-1,4	54,9	145,1	11,04
FALSK	High	Master Protein	Q9UKU0-1	Isoform 1 of Long-chain-fatty-acid--CoA ligase 6 [OS=Homo sapiens]	FALSK	0	59,72119198	22,8531856	13	29	1	1	722	80,559	7,28	High	High	High	High	High	High	High	High	High	High	High	High	High	High	High	High	High	High	High	High		23305	ENSG00000164398.12	ACSL6	5	metabolic process	membrane	catalytic activity;nucleotide binding;protein binding	Pf00501	0,379	-1,4	55	145	20,68
FALSK	High	Master Protein	A5A761	Sideroflexin-1 [OS=Sus scrofa]	FALSK	0	46,14707864	45,0310559	9	24	8	1	322	35,601	9,23	High	High	High	High	High	High	High	High	High	High	High	High	High	High	High	High	High	High	High	High		100049699	ENSSSCG00000014063.2	SFXN1	2	cell differentiation;transport	membrane;mitochondrion	transporter activity	Pf03820	0,38	-1,4	55	145	10,12
FALSK	High	Master Protein	O14807-1	Ras-related protein M-Ras [OS=Homo sapiens]	FALSK	0	13,00010285	17,78846154	3	3	3	1	208	23,831	8,79	High	High	High	High	High	High	High	High	High	High	High	High	High	High	High	High	High	High	High	High		22808	ENSG00000158186.12	MRAS	3	cell organization and biogenesis;development;regulation of biological process;response to stimulus	membrane	catalytic activity;nucleotide binding;protein binding	Pf00009, Pf00071, Pf08477	0,38	-1,4	55,1	144,9	15,88
FALSK	High	Master Protein	Q96GY0	Zinc finger C2HC domain-containing protein 1A [OS=Homo sapiens]	FALSK	0,000396275	5,150360362	8,615384615	2	3	2	1	325	35,07	9,82	High	High	High	High	High	High	High	High	High	High	High	High	High	High	High	High	High	High	High	High		51101	ENSG00000104427.11	ZC2HC1A	8			metal ion binding;protein binding	Pf13913	0,38	-1,39	55,1	144,9	13,2
FALSK	High	Master Protein	P48066	Sodium- and chloride-dependent GABA transporter 3 [OS=Homo sapiens]	FALSK	0,000396275	6,574148766	4,588607595	3	9	3	1	632	70,558	6,89	High	High	High	High	High	High	High	High	High	High	High	High	High	High	High	High	High	High	High	High		6538	ENSG00000132164.9	SLC6A11	3	cell communication;response to stimulus;transport	cytoplasm;membrane	transporter activity	Pf00209	0,381	-1,39	55,1	144,9	19,4
FALSK	High	Master Protein	Q9TUI8	Fatty-acid amide hydrolase 1 [OS=Sus scrofa]	FALSK	0	47,35674042	33,50604491	11	29	11	1	579	62,816	7,62	High	High	High	High	High	High	High	High	High	High	High	High	High	High	High	High	High	High	High	High		396949		FAAH	6	metabolic process	endoplasmic reticulum;Golgi;membrane	catalytic activity	Pf01425	0,381	-1,39	55,2	144,8	33,68
FALSK	High	Master Protein	Q8SPR7	1-phosphatidylinositol 4,5-bisphosphate phosphodiesterase delta-4 [OS=Sus scrofa]	FALSK	0	38,78705831	15,15544041	10	26	10	1	772	88,02	5,16	High	High	High	High	High	High	High	High	High	High	High	High	High	High	High	High	High	High	High	High		397119	ENSSSCG00000016192.2	PLCD4	15	metabolic process;regulation of biological process;response to stimulus;transport	cytoplasm;endoplasmic reticulum;membrane;nucleus	catalytic activity;metal ion binding;protein binding;signal transducer activity	Pf00168, Pf00169, Pf00387, Pf00388, Pf09279, Pf13499, Pf14788	0,382	-1,39	55,3	144,7	13,89
FALSK	High	Master Protein	O75251	NADH dehydrogenase [ubiquinone] iron-sulfur protein 7, mitochondrial [OS=Homo sapiens]	FALSK	0	17,46086654	18,30985915	4	18	4	1	213	23,548	9,99	High	High	High	High	High	High	High	High	High	High	High	High	High	High	High	High	High	High	High	High		374291	ENSG00000115286.19	NDUFS7	19	cell organization and biogenesis;metabolic process;transport	membrane;mitochondrion;organelle lumen	catalytic activity;metal ion binding;protein binding	Pf01058	0,382	-1,39	55,3	144,7	16,77
FALSK	High	Master Protein	P05937	Calbindin [OS=Homo sapiens]	FALSK	0	52,41226846	46,36015326	11	40	10	1	261	30,006	4,83	High	High	High	High	High	High	High	High	High	High	High	High	High	High	High	High	High	High	High	High		793	ENSG00000104327.7	CALB1	8	cellular homeostasis;regulation of biological process;response to stimulus	cytoplasm;cytosol;nucleus	metal ion binding;protein binding	Pf00036, Pf13405, Pf13499	0,383	-1,39	55,4	144,6	21,38
FALSK	High	Master Protein	P59768	Guanine nucleotide-binding protein G(I)/G(S)/G(O) subunit gamma-2 [OS=Homo sapiens]	FALSK	0	13,39252971	42,25352113	2	21	2	1	71	7,845	7,99	High	High	High	High	High	High	High	High	High	High	High	High	High	High	High	High	High	High	High	High		54331	ENSG00000186469.8	GNG2	14	cell proliferation;metabolic process;regulation of biological process;response to stimulus	membrane	protein binding;signal transducer activity	Pf00631	0,383	-1,38	55,4	144,6	14,35
FALSK	High	Master Protein	P62508-5	Isoform 5 of Estrogen-related receptor gamma [OS=Homo sapiens]	FALSK	0	14,76213602	12,9787234	4	5	2	1	470	52,428	7,06	Not Found	Not Found	Not Found	Not Found	Not Found	High	High	High	High	High	Not Found	Not Found	Not Found	Not Found	Not Found	High	High	High	High	High		2104	ENSG00000196482.16	ESRRG	1	metabolic process;regulation of biological process;response to stimulus	nucleus	DNA binding;metal ion binding;protein binding;receptor activity;signal transducer activity	Pf00104, Pf00105	0,384	-1,38	55,5	144,5	39,34
FALSK	High	Master Protein	P12236	ADP/ATP translocase 3 [OS=Homo sapiens]	FALSK	0	89,86694686	63,08724832	16	193	1	1	298	32,845	9,74	High	High	High	High	High	Not Found	Not Found	Not Found	Not Found	Not Found	High	High	High	High	High	Not Found	Not Found	Not Found	Not Found	Not Found		293	ENSG00000169100.13	SLC25A6	X|Y; X	cell death;metabolic process;regulation of biological process;response to stimulus;transport	membrane;mitochondrion;nucleus	protein binding;structural molecule activity;transporter activity	Pf00153	0,384	-1,38	55,5	144,5	13,53
FALSK	High	Master Protein	P16499	Rod cGMP-specific 3',5'-cyclic phosphodiesterase subunit alpha [OS=Homo sapiens]	FALSK	0	72,19689469	20,58139535	17	47	10	1	860	99,483	5,72	High	High	High	High	High	High	High	High	High	High	High	High	High	High	High	High	High	High	High	High		5145	ENSG00000132915.10	PDE6A	5	cellular homeostasis;metabolic process;regulation of biological process;response to stimulus	membrane	catalytic activity;metal ion binding;protein binding	Pf00233, Pf01590, Pf13185	0,384	-1,38	55,5	144,5	17,87
FALSK	High	Master Protein	Q16572	Vesicular acetylcholine transporter [OS=Homo sapiens]	FALSK	0,000396275	5,719509954	5,07518797	2	3	2	1	532	56,867	6,19	High	High	High	High	High	Not Found	Not Found	Not Found	Not Found	Not Found	High	High	High	High	High	High	High	High	High	Not Found		6572	ENSG00000187714.6	SLC18A3	10	cell communication;transport	membrane	transporter activity	Pf01306, Pf07690, Pf13347	0,385	-1,38	55,5	144,5	16,56
FALSK	High	Master Protein	Q14168-4	Isoform 4 of MAGUK p55 subfamily member 2 [OS=Homo sapiens]	FALSK	0	51,09724711	25,79564489	12	29	11	1	597	66,76	6,65	High	High	High	High	High	High	High	High	High	High	High	High	High	High	High	High	High	High	High	High								protein binding	Pf00018, Pf00595, Pf00625, Pf02828, Pf07653, Pf13180, Pf14685	0,385	-1,38	55,6	144,4	13,42
FALSK	High	Master Protein	O75916-3	Isoform 3 of Regulator of G-protein signaling 9 [OS=Homo sapiens]	FALSK	0	18,92720992	14,46280992	7	12	7	1	484	56,74	9,39	High	High	High	High	High	High	High	High	High	High	High	High	High	High	High	High	High	High	High	High						regulation of biological process;response to stimulus		signal transducer activity	Pf00610, Pf00615, Pf00631	0,386	-1,37	55,7	144,3	34,55
FALSK	High	Master Protein	P27816-3	Isoform 3 of Microtubule-associated protein 4 [OS=Homo sapiens]	FALSK	0	7,990299509	4,452690167	3	14	2	1	539	58,52	6,04	High	High	High	High	High	High	High	High	High	High	High	High	High	High	High	High	High	High	High	High		4134		MAP4	3	cell division;cell organization and biogenesis;cellular component movement;regulation of biological process	cytoplasm;cytoskeleton;membrane	protein binding;RNA binding;structural molecule activity		0,387	-1,37	55,8	144,2	18,07
FALSK	High	Master Protein	Q15118-2	Isoform 2 of [Pyruvate dehydrogenase (acetyl-transferring)] kinase isozyme 1, mitochondrial [OS=Homo sapiens]	FALSK	0	32,14235392	23,02631579	7	11	7	1	456	51,59	8,98	High	High	High	High	High	High	High	High	High	High	High	High	High	High	High	High	High	High	High	High		5163	ENSG00000152256.13	PDK1	2	cell proliferation;metabolic process;regulation of biological process;response to stimulus	mitochondrion;organelle lumen	catalytic activity;nucleotide binding;protein binding	Pf02518, Pf10436	0,387	-1,37	55,8	144,2	17,01
FALSK	High	Master Protein	Q2EN81	ATP synthase subunit O, mitochondrial [OS=Sus scrofa]	FALSK	0	48,32812198	52,11267606	9	70	9	1	213	23,355	9,96	High	High	High	High	High	High	High	High	High	High	High	High	High	High	High	High	High	High	High	High		733678	ENSSSCG00000012042.2	LOC733678; ATP5O	13	metabolic process;transport	membrane;mitochondrion	catalytic activity;transporter activity	Pf00213	0,387	-1,37	55,9	144,1	12,97
FALSK	High	Master Protein	Q9UKU0-8	Isoform 8 of Long-chain-fatty-acid--CoA ligase 6 [OS=Homo sapiens]	FALSK	0	56,01283765	22,16066482	13	28	1	1	722	80,477	7,18	High	High	High	High	High	Not Found	Not Found	Not Found	Not Found	Not Found	High	High	High	High	High	Not Found	Not Found	Not Found	Not Found	Not Found		23305	ENSG00000164398.12	ACSL6	5	metabolic process	membrane	catalytic activity;nucleotide binding;protein binding	Pf00501	0,388	-1,36	55,9	144,1	6,78
FALSK	High	Master Protein	Q9P2U7	Vesicular glutamate transporter 1 [OS=Homo sapiens]	FALSK	0	43,40115192	16,07142857	7	23	7	1	560	61,573	7,47	High	High	High	High	High	High	High	High	High	High	High	High	High	High	High	High	High	High	High	High		57030	ENSG00000104888.9	SLC17A7	19	cell communication;cellular homeostasis;response to stimulus;transport	membrane	transporter activity	Pf07690	0,389	-1,36	56	144	12,59
FALSK	High	Master Protein	Q92752	Tenascin-R [OS=Homo sapiens]	FALSK	0	32,19652471	8,026509573	7	12	7	1	1358	149,467	4,82	High	High	High	High	High	High	High	High	High	High	High	High	High	High	High	High	High	High	High	High		7143	ENSG00000116147.16	TNR	1	cell organization and biogenesis;cellular component movement;regulation of biological process;response to stimulus	cell surface;cytoplasm;extracellular;membrane;nucleus	protein binding	Pf00041, Pf00147, Pf07974	0,39	-1,36	56,1	143,9	30,18
FALSK	High	Master Protein	P09104	Gamma-enolase [OS=Homo sapiens]	FALSK	0	155,0395758	59,44700461	16	637	12	1	434	47,239	5,03	High	High	High	High	High	High	High	High	High	High	High	High	High	High	High	High	High	High	High	High		2026	ENSG00000111674.8	ENO2	12	metabolic process	cytoplasm;cytosol;membrane	catalytic activity;metal ion binding;protein binding	Pf00113, Pf03952, Pf13378	0,39	-1,36	56,1	143,9	5,14
FALSK	High	Master Protein	O75380	NADH dehydrogenase [ubiquinone] iron-sulfur protein 6, mitochondrial [OS=Homo sapiens]	FALSK	0,000396275	6,640342824	15,32258065	2	8	2	1	124	13,703	8,28	High	High	High	High	High	High	High	High	High	High	High	High	High	High	High	High	High	High	High	High		4726	ENSG00000145494.11	NDUFS6	5	cell organization and biogenesis;metabolic process;transport	membrane;mitochondrion	catalytic activity	Pf10276	0,39	-1,36	56,1	143,9	12,75
FALSK	High	Master Protein	P35243	Recoverin [OS=Homo sapiens]	FALSK	0	26,49912065	19,5	4	30	4	1	200	23,116	5,16	High	High	High	High	High	High	High	High	High	High	High	High	High	High	High	High	High	High	High	High		5957	ENSG00000109047.7	RCVRN	17	regulation of biological process;response to stimulus		enzyme regulator activity;metal ion binding	Pf00036, Pf13499, Pf13833	0,39	-1,36	56,1	143,9	13,98
FALSK	High	Master Protein	P78563-5	Isoform 5 of Double-stranded RNA-specific editase 1 [OS=Homo sapiens]	FALSK	0,000112082	6,995412111	2,53164557	2	4	2	1	790	86,638	9,54	High	High	High	High	High	High	High	High	High	High	High	High	High	High	High	High	High	High	High	High						metabolic process		catalytic activity;RNA binding	Pf00035, Pf02137, Pf13900	0,39	-1,36	56,1	143,9	11,88
FALSK	High	Master Protein	P49758-3	Isoform 3 of Regulator of G-protein signaling 6 [OS=Homo sapiens]	FALSK	0	18,69826184	15,71428571	6	13	4	1	490	56,477	7,71	High	High	High	High	High	High	High	High	High	High	High	High	High	High	High	High	High	High	High	High		9628	ENSG00000182732.16	RGS6	14	regulation of biological process;response to stimulus	cytosol;membrane;nucleus	enzyme regulator activity;protein binding;signal transducer activity	Pf00610, Pf00615, Pf00631	0,392	-1,35	56,3	143,7	10,78
FALSK	High	Master Protein	P33402-2	Isoform 2 of Guanylate cyclase soluble subunit alpha-2 [OS=Homo sapiens]	FALSK	0	37,96274607	17,82437746	9	16	9	1	763	85,204	7,36	High	High	High	High	High	High	High	High	High	High	High	High	High	High	High	High	High	High	High	High		2977	ENSG00000152402.10	GUCY1A2	11	metabolic process;regulation of biological process;response to stimulus	membrane	catalytic activity;nucleotide binding	Pf00211, Pf07700, Pf07701	0,392	-1,35	56,3	143,7	14,6
FALSK	High	Master Protein	Q96GD0	Pyridoxal phosphate phosphatase [OS=Homo sapiens]	FALSK	0	12,92462703	13,51351351	3	14	3	1	296	31,678	6,55	High	High	High	High	High	High	High	High	High	High	High	High	High	High	High	High	High	High	High	High		57026	ENSG00000241360.1	PDXP	22	cell organization and biogenesis;metabolic process;regulation of biological process;response to stimulus	cytoplasm;cytoskeleton;cytosol;membrane	catalytic activity;metal ion binding;protein binding	Pf00702, Pf09419, Pf13242, Pf13344, Pf13419	0,392	-1,35	56,3	143,7	11,49
FALSK	High	Master Protein	Q7Z3B1	Neuronal growth regulator 1 [OS=Homo sapiens]	FALSK	0	17,86844212	16,66666667	4	11	4	1	354	38,694	6,21	High	High	High	High	High	High	High	High	High	High	High	High	High	High	High	High	High	High	High	High		257194	ENSG00000172260.14	NEGR1	1	regulation of biological process;response to stimulus	membrane	protein binding	Pf00047, Pf07679, Pf13895, Pf13927	0,392	-1,35	56,3	143,7	10,55
FALSK	High	Master Protein	O75061-4	Isoform 4 of Putative tyrosine-protein phosphatase auxilin [OS=Homo sapiens]	FALSK	0	48,24405355	13,77777778	10	29	1	1	900	98,587	7,36	High	High	High	High	High	High	High	High	High	High	High	High	High	High	High	High	High	High	High	High	Acetyl [N-Term]	9829	ENSG00000116675.15	DNAJC6	1	cell organization and biogenesis;metabolic process;regulation of biological process	cytosol	catalytic activity;protein binding	Pf00226, Pf10409	0,392	-1,35	56,4	143,6	13,4
FALSK	High	Master Protein	Q96P47-4	Isoform 4 of Arf-GAP with GTPase, ANK repeat and PH domain-containing protein 3 [OS=Homo sapiens]	FALSK	0	9,465855305	2,96377607	2	4	1	1	911	97,891	7,96	High	High	High	High	High	High	High	High	High	High	High	High	High	High	High	High	High	High	High	High		116988	ENSG00000133612.18	AGAP3	7	regulation of biological process;response to stimulus	cytoplasm;membrane	enzyme regulator activity;metal ion binding;nucleotide binding;protein binding	Pf00023, Pf00071, Pf00169, Pf01412, Pf08477, Pf12796, Pf13637, Pf13857	0,394	-1,34	56,5	143,5	31,26
FALSK	High	Master Protein	P48167	Glycine receptor subunit beta [OS=Homo sapiens]	FALSK	0	8,646789942	5,23138833	2	4	2	1	497	56,086	8,85	High	High	High	High	High	High	High	High	High	High	High	High	High	High	High	High	High	High	High	High		2743	ENSG00000109738.10	GLRB	4	cell communication;cell organization and biogenesis;regulation of biological process;response to stimulus;transport	cytoplasm;membrane	protein binding;transporter activity	Pf02931, Pf02932	0,394	-1,34	56,5	143,5	16,53
FALSK	High	Master Protein	P19086	guanine nucleotide-binding protein G(z) subunit alpha [OS=Homo sapiens]	FALSK	0	34,45560551	19,71830986	6	22	6	1	355	40,898	7,61	High	High	High	High	High	High	High	High	High	High	High	High	High	High	High	High	High	High	High	High		2781	ENSG00000128266.8	GNAZ	22	metabolic process;regulation of biological process;response to stimulus	cytosol;endoplasmic reticulum;membrane	catalytic activity;metal ion binding;nucleotide binding;protein binding;signal transducer activity	Pf00025, Pf00503, Pf13481	0,394	-1,34	56,6	143,4	19,56
FALSK	High	Master Protein	P09623	Dihydrolipoyl dehydrogenase, mitochondrial [OS=Sus scrofa]	FALSK	0	88,44924824	44,2043222	13	60	13	1	509	54,151	7,68	High	High	High	High	High	High	High	High	High	High	High	High	High	High	High	High	High	High	High	High		397129		DLD	9	cellular homeostasis;metabolic process;regulation of biological process	mitochondrion;organelle lumen	catalytic activity;nucleotide binding	Pf00070, Pf00890, Pf01134, Pf02852, Pf03486, Pf07992, Pf12831, Pf13450, Pf13738	0,394	-1,34	56,6	143,4	12,93
FALSK	High	Master Protein	Q93050-3	Isoform 3 of V-type proton ATPase 116 kDa subunit a isoform 1 [OS=Homo sapiens]	FALSK	0	116,3283578	32,10023866	22	88	22	1	838	96,537	6,64	High	High	High	High	High	High	High	High	High	High	High	High	High	High	High	High	High	High	High	High		535	ENSG00000033627.15	ATP6V0A1	17	cell organization and biogenesis;cellular homeostasis;metabolic process;regulation of biological process;response to stimulus;transport	cytoplasm;Golgi;membrane	catalytic activity;protein binding;transporter activity	Pf01496	0,395	-1,34	56,6	143,4	12,8
FALSK	High	Master Protein	O79875	NADH-ubiquinone oxidoreductase chain 2 [OS=Sus scrofa]	FALSK	0	8,679455841	7,492795389	2	4	2	1	347	39,028	9,76	High	High	High	High	High	High	High	High	High	High	High	High	High	High	High	High	High	High	High	High		808502		ND2	MT	metabolic process;transport	membrane;mitochondrion	catalytic activity	Pf00361, Pf06444	0,395	-1,34	56,6	143,4	19,03
FALSK	High	Master Protein	Q02153	guanylate cyclase soluble subunit beta-1 [OS=Homo sapiens]	FALSK	0	62,79864044	27,62520194	15	36	15	1	619	70,47	5,35	High	High	High	High	High	High	High	High	High	High	High	High	High	High	High	High	High	High	High	High		2983	ENSG00000061918.12	GUCY1B3	4	metabolic process;regulation of biological process;response to stimulus	cytoplasm;membrane	catalytic activity;metal ion binding;nucleotide binding;protein binding;receptor activity	Pf00211, Pf07700, Pf07701	0,396	-1,34	56,7	143,3	10,22
FALSK	High	Master Protein	Q9Y3E1	Hepatoma-derived growth factor-related protein 3 [OS=Homo sapiens]	FALSK	0	27,53056909	46,30541872	6	41	5	1	203	22,606	7,99	High	High	High	High	High	High	High	High	High	High	High	High	High	High	High	High	High	High	High	High		50810	ENSG00000166503.8	HDGFRP3	15	cell organization and biogenesis;cell proliferation;regulation of biological process	cytoplasm;cytosol;nucleus	protein binding	Pf00855	0,397	-1,33	56,8	143,2	22,2
FALSK	High	Master Protein	P0C267	Coiled-coil domain-containing protein 127 [OS=Sus scrofa]	FALSK	0,000396275	5,212750432	13,56589147	3	5	3	1	258	30,27	9,36	High	High	High	High	High	High	High	High	High	High	High	High	High	High	High	High	High	High	High	High		100622581		LOC100622581; CCDC127						0,397	-1,33	56,8	143,2	16,85
FALSK	High	Master Protein	P22676	Calretinin [OS=Homo sapiens]	FALSK	0	66,57018987	46,12546125	11	73	10	1	271	31,52	5,15	High	High	High	High	High	High	High	High	High	High	High	High	High	High	High	High	High	High	High	High		794	ENSG00000282830.1; ENSG00000172137.18	CALB2	16; CHR_HSCHR16_4_CTG3_1	cellular homeostasis	cytoplasm;cytosol;nucleus	metal ion binding	Pf00036, Pf13405, Pf13499	0,397	-1,33	56,9	143,1	23,7
FALSK	High	Master Protein	Q9MYT8	ATP synthase subunit e, mitochondrial [OS=Sus scrofa]	FALSK	0	18,7308525	43,66197183	3	42	3	1	71	8,226	9,31	High	High	High	High	High	High	High	High	High	High	High	High	High	High	High	High	High	High	High	High		396950	ENSSSCG00000023903.1	ATP5I	8	metabolic process;transport	membrane;mitochondrion	catalytic activity;transporter activity	Pf05680	0,398	-1,33	56,9	143,1	5,71
FALSK	High	Master Protein	A1XQR7	MICOS complex subunit MIC13 [OS=Sus scrofa]	FALSK	0	20,768611	50	5	18	5	1	118	13,314	9,17	High	High	High	High	High	High	High	High	High	High	High	High	High	High	High	High	High	High	High	High		100037978		QIL1; C2H19orf70	2	cell organization and biogenesis	membrane;mitochondrion			0,399	-1,33	57	143	11,91
FALSK	High	Master Protein	P07954	fumarate hydratase, mitochondrial [OS=Homo sapiens]	FALSK	0	110,2801835	42,94117647	14	76	2	1	510	54,602	8,76	High	High	High	High	High	High	High	High	High	High	High	High	High	High	High	High	High	High	High	High		2271	ENSG00000091483.6	FH	1	cell organization and biogenesis;metabolic process	cytoplasm;cytosol;mitochondrion;organelle lumen	catalytic activity;protein binding	Pf00206, Pf10415	0,399	-1,33	57	143	6,5
FALSK	High	Master Protein	P78357	Contactin-associated protein 1 [OS=Homo sapiens]	FALSK	0	37,25042866	7,514450867	8	17	8	1	1384	156,167	7,05	High	High	High	High	High	High	High	High	High	High	High	High	High	High	High	High	High	High	High	High		8506	ENSG00000108797.11	CNTNAP1	17	cell organization and biogenesis;regulation of biological process;response to stimulus	membrane	protein binding;receptor activity	Pf00054, Pf00147, Pf00754, Pf02210	0,4	-1,32	57,1	142,9	25,19
FALSK	High	Master Protein	Q00325-1	Phosphate carrier protein, mitochondrial [OS=Homo sapiens]	FALSK	0	28,6052757	37,01657459	9	49	9	1	362	40,069	9,38	High	High	High	High	High	High	High	High	High	High	High	High	High	High	High	High	High	High	High	High		5250	ENSG00000075415.12	SLC25A3	12	metabolic process;transport	membrane;mitochondrion;nucleus	protein binding;structural molecule activity;transporter activity	Pf00153	0,401	-1,32	57,2	142,8	11,79
FALSK	High	Master Protein	Q9UPA5	Protein bassoon [OS=Homo sapiens]	FALSK	0	41,64444385	3,718797759	9	15	9	1	3926	416,214	7,55	High	High	High	High	High	High	High	High	High	High	High	High	High	High	High	High	High	High	High	High		8927	ENSG00000164061.4	BSN	3	cell communication;cell organization and biogenesis	cell surface;cytoplasm;cytoskeleton;nucleus	metal ion binding	Pf05715	0,403	-1,31	57,5	142,5	12,17
FALSK	High	Master Protein	O94910	Adhesion G protein-coupled receptor L1 [OS=Homo sapiens]	FALSK	0	9,071494283	4,138398915	4	5	4	1	1474	162,614	6,6	High	High	High	High	High	High	High	High	High	High	High	High	High	High	High	High	High	High	High	High		22859	ENSG00000072071.16	LPHN1; ADGRL1	19	regulation of biological process;response to stimulus;transport	cytosol;membrane	protein binding;receptor activity;signal transducer activity	Pf00002, Pf01825, Pf02140, Pf02191, Pf02354, Pf02793, Pf12003	0,403	-1,31	57,5	142,5	17,56
FALSK	High	Master Protein	P48454-3	Isoform 3 of Serine/threonine-protein phosphatase 2B catalytic subunit gamma isoform [OS=Homo sapiens]	FALSK	0	9,176695724	5,182341651	3	6	1	1	521	59,224	6,99	Not Found	Not Found	Not Found	Not Found	Not Found	High	High	High	High	High	Not Found	Not Found	Not Found	Not Found	Not Found	High	High	High	High	High		5533	ENSG00000120910.14	PPP3CC	8	metabolic process;regulation of biological process	cytosol;mitochondrion	catalytic activity;metal ion binding;protein binding	Pf00149	0,404	-1,31	57,5	142,5	19,15
FALSK	High	Master Protein	Q7Z4S6-4	Isoform 4 of Kinesin-like protein KIF21A [OS=Homo sapiens]	FALSK	0	78,53729257	14,32835821	17	31	17	1	1675	187,15	6,42	High	High	High	High	High	High	High	High	High	High	High	High	High	High	High	High	High	High	High	High		55605		KIF21A	12	cell organization and biogenesis;cellular component movement;metabolic process;regulation of biological process;transport	cytoplasm	catalytic activity;motor activity;nucleotide binding;protein binding;structural molecule activity	Pf00038, Pf00225, Pf00400, Pf00769, Pf01576, Pf02050, Pf02463, Pf02841, Pf02996, Pf03938, Pf03962, Pf04111, Pf05010, Pf05483, Pf05557, Pf05622, Pf07926, Pf09731, Pf10174, Pf10211, Pf11600, Pf12037, Pf12128, Pf12718, Pf13166, Pf13514, Pf13863, Pf13868, Pf14943, Pf14988, Pf15558, Pf15619	0,404	-1,31	57,6	142,4	20,9
FALSK	High	Master Protein	P29804	Pyruvate dehydrogenase E1 component subunit alpha, somatic form, mitochondrial [OS=Sus scrofa]	FALSK	0	54,07723653	45,50128535	13	70	3	1	389	43,094	7,9	High	High	High	High	High	High	High	High	High	High	High	High	High	High	High	High	High	High	High	High		100294678		PDHA1	X	metabolic process	mitochondrion;organelle lumen	catalytic activity	Pf00676	0,405	-1,3	57,6	142,4	7,11
FALSK	High	Master Protein	P06753-4	Isoform 4 of Tropomyosin alpha-3 chain [OS=Homo sapiens]	FALSK	0	45,31762508	41,29554656	12	57	1	1	247	28,776	4,77	Not Found	Not Found	Not Found	Not Found	Not Found	High	High	High	High	High	Not Found	Not Found	Not Found	Not Found	Not Found	High	High	High	High	High		7170	ENSG00000143549.19	TPM3	1	cellular component movement	cytoskeleton;cytosol	protein binding	Pf00261, Pf12718	0,406	-1,3	57,7	142,3	23,38
FALSK	High	Master Protein	P14927-2	Isoform 2 of Cytochrome b-c1 complex subunit 7 [OS=Homo sapiens]	FALSK	0	10,62294303	14,28571429	2	8	2	1	140	16,256	8,97	High	High	High	High	High	High	High	High	High	High	High	High	High	High	High	High	High	High	High	High		7381	ENSG00000156467.9	UQCRB	8	cell organization and biogenesis;metabolic process;transport	membrane	catalytic activity;protein binding;transporter activity	Pf02271	0,407	-1,3	57,8	142,2	12,65
FALSK	High	Master Protein	P54819	Adenylate kinase 2, mitochondrial [OS=Homo sapiens]	FALSK	0	32,9324345	42,67782427	7	29	7	1	239	26,461	7,81	High	High	High	High	High	High	High	High	High	High	High	High	High	High	High	High	High	High	High	High		204	ENSG00000004455.16	AK2	1	metabolic process;response to stimulus	cytosol;membrane;mitochondrion	catalytic activity;nucleotide binding	Pf00406, Pf05191, Pf13207, Pf13671	0,408	-1,29	57,9	142,1	9,54
FALSK	High	Master Protein	Q8WY54	Protein phosphatase 1E [OS=Homo sapiens]	FALSK	0	37,62341562	17,80104712	8	19	8	1	764	84,948	5,03	High	High	High	High	High	High	High	High	High	High	High	High	High	High	High	High	High	High	High	High		22843		PPM1E	17	metabolic process;regulation of biological process;response to stimulus	cytoplasm;mitochondrion;nucleus	catalytic activity;metal ion binding;protein binding	Pf00481	0,408	-1,29	58	142	12,17
FALSK	High	Master Protein	Q9NZ94	Neuroligin-3 [OS=Homo sapiens]	FALSK	0	22,1802628	8,372641509	6	13	2	1	848	93,836	6,39	High	High	High	High	High	High	High	High	High	High	High	High	High	High	High	High	High	High	High	High		54413	ENSG00000196338.12	NLGN3	X	cell differentiation;cell growth;cell organization and biogenesis;metabolic process;regulation of biological process;response to stimulus;transport	cell surface;membrane	catalytic activity;protein binding;receptor activity	Pf00135, Pf07859	0,408	-1,29	58	142	30,81
FALSK	High	Master Protein	O00330-1	Pyruvate dehydrogenase protein X component, mitochondrial [OS=Homo sapiens]	FALSK	0	26,45955744	16,36726547	8	22	8	1	501	54,089	8,66	High	High	High	High	High	High	High	High	High	High	High	High	High	High	High	High	High	High	High	High		8050	ENSG00000110435.11	PDHX	11	metabolic process;regulation of biological process	mitochondrion;organelle lumen	catalytic activity;protein binding	Pf00198, Pf00364, Pf02817	0,409	-1,29	58	142	11,67
FALSK	High	Master Protein	Q9NQC3-3	Isoform 3 of Reticulon-4 [OS=Homo sapiens]	FALSK	0	44,99226222	36,18090452	6	119	1	1	199	22,381	9,31	High	High	High	High	High	High	High	High	High	High	High	High	High	High	High	High	High	High	High	High		57142	ENSG00000115310.17	RTN4	2	cell death;cell organization and biogenesis;cellular component movement;regulation of biological process	endoplasmic reticulum;membrane	protein binding;RNA binding	Pf02453	0,409	-1,29	58	142	28,67
FALSK	High	Master Protein	P63027	Vesicle-associated membrane protein 2 [OS=Homo sapiens]	FALSK	0	46,19911478	35,34482759	4	39	2	1	116	12,655	8,13	High	High	High	High	High	High	High	High	High	High	High	High	High	High	High	High	High	High	High	High		6844	ENSG00000220205.8	VAMP2	17	cell organization and biogenesis;regulation of biological process;response to stimulus;transport	cytosol;membrane;vacuole	protein binding	Pf00957	0,409	-1,29	58	142	15,47
FALSK	High	Master Protein	Q16555-1	Dihydropyrimidinase-related protein 2 [OS=Homo sapiens]	FALSK	0	172,4530067	48,25174825	16	251	13	1	572	62,255	6,38	High	High	High	High	High	High	High	High	High	High	High	High	High	High	High	High	High	High	High	High		1808	ENSG00000092964.17	DPYSL2	8	cell differentiation;cell organization and biogenesis;cellular component movement;development;metabolic process;regulation of biological process;response to stimulus;transport	cytoplasm;cytoskeleton;cytosol;membrane;mitochondrion	catalytic activity;protein binding	Pf01979, Pf07969, Pf13147, Pf13594	0,409	-1,29	58	142	15,6
FALSK	High	Master Protein	P50667	Cytochrome c oxidase subunit 2 [OS=Sus scrofa]	FALSK	0	23,83413411	20,1754386	3	16	3	1	228	26,167	4,89	High	High	High	High	High	High	High	High	High	High	High	High	High	High	High	High	High	High	High	High						metabolic process;transport	membrane;mitochondrion	catalytic activity;metal ion binding;transporter activity	Pf00116, Pf02790	0,41	-1,29	58,1	141,9	17,54
FALSK	High	Master Protein	Q29380	Voltage-dependent anion-selective channel protein 3 [OS=Sus scrofa]	FALSK	0	50,32408144	36,74911661	8	53	1	1	283	30,558	8,66	High	High	High	High	High	High	High	High	High	High	High	High	High	High	High	High	High	High	High	High		397651		VDAC1P5	17	regulation of biological process;transport	membrane;mitochondrion	nucleotide binding;transporter activity	Pf01459	0,411	-1,28	58,2	141,8	17,59
FALSK	High	Master Protein	Q9H3Z4	DnaJ homolog subfamily C member 5 [OS=Homo sapiens]	FALSK	0	17,47955417	20,2020202	5	11	5	1	198	22,134	5,07	High	High	High	High	High	High	High	High	High	High	High	High	High	High	High	High	High	High	High	High		80331	ENSG00000101152.10	DNAJC5	20	regulation of biological process;transport	cytosol;membrane;mitochondrion	protein binding	Pf00226	0,411	-1,28	58,3	141,7	13,78
FALSK	High	Master Protein	Q95283	Cytochrome c oxidase subunit 4 isoform 1, mitochondrial [OS=Sus scrofa]	FALSK	0	30,41399257	46,39175258	5	73	5	1	97	11,039	9,33	High	High	High	High	High	High	High	High	High	High	High	High	High	High	High	High	High	High	High	High						metabolic process;transport	membrane;mitochondrion	catalytic activity;transporter activity	Pf02936	0,412	-1,28	58,3	141,7	14,08
FALSK	High	Master Protein	Q00577	Transcriptional activator protein Pur-alpha [OS=Homo sapiens]	FALSK	0	64,89272107	45,0310559	9	57	9	1	322	34,889	6,44	High	High	High	High	High	High	High	High	High	High	High	High	High	High	High	High	High	High	High	High		5813	ENSG00000185129.5	PURA	5	cell differentiation;metabolic process;regulation of biological process	cytoplasm;nucleus	DNA binding;protein binding;RNA binding;translation regulator activity	Pf04845	0,412	-1,28	58,3	141,7	4,5
FALSK	High	Master Protein	P08237-3	Isoform 3 of ATP-dependent 6-phosphofructokinase, muscle type [OS=Homo sapiens]	FALSK	0	163,7947864	33,960047	19	131	1	1	851	93,194	7,97	High	High	High	High	High	High	High	High	High	High	High	High	High	High	High	High	High	High	High	High		5213	ENSG00000152556.15	PFKM	12	cell organization and biogenesis;cellular homeostasis;metabolic process;regulation of biological process	cytoplasm;cytosol;membrane	catalytic activity;metal ion binding;nucleotide binding;protein binding	Pf00365	0,413	-1,28	58,4	141,6	11,61
FALSK	High	Master Protein	Q8IWQ3-5	Isoform 5 of Serine/threonine-protein kinase BRSK2 [OS=Homo sapiens]	FALSK	0	17,70954358	8,61618799	5	10	3	1	766	84,779	8,9	High	High	High	High	High	High	High	High	High	High	High	High	High	High	High	High	High	High	High	High		9024	ENSG00000174672.15	BRSK2	11	cell differentiation;cell division;cell organization and biogenesis;metabolic process;regulation of biological process;response to stimulus;transport	cytoplasm;endoplasmic reticulum;nucleus	catalytic activity;enzyme regulator activity;metal ion binding;nucleotide binding;protein binding	Pf00069, Pf01633, Pf07714	0,413	-1,27	58,5	141,5	9,62
FALSK	High	Master Protein	Q9Y639-2	Neuroplastin [OS=Homo sapiens]	FALSK	0	33,31915479	21,10552764	7	24	7	1	398	44,36	7,99	High	High	High	High	High	High	High	High	High	High	High	High	High	High	High	High	High	High	High	High		27020	ENSG00000156642.16	NPTN	15	cell organization and biogenesis;cellular homeostasis;metabolic process;regulation of biological process;response to stimulus	cell surface;cytosol;membrane	catalytic activity;protein binding;receptor activity;signal transducer activity	Pf00047, Pf07679, Pf07686, Pf13895, Pf13927	0,413	-1,27	58,5	141,5	10,68
FALSK	High	Master Protein	Q8N668	COMM domain-containing protein 1 [OS=Homo sapiens]	FALSK	0	9,526756303	18,42105263	2	2	2	1	190	21,165	6,2	High	High	High	High	High	Not Found	Not Found	Not Found	Not Found	Not Found	High	High	High	High	High	Not Found	Not Found	Not Found	Not Found	Not Found		150684	ENSG00000173163.10	COMMD1	2	metabolic process;regulation of biological process;transport	cytoplasm;endosome;membrane;nucleus	metal ion binding;protein binding	Pf07258	0,415	-1,27	58,6	141,4	15,59
FALSK	High	Master Protein	Q9UJS0-2	Isoform 2 of Calcium-binding mitochondrial carrier protein Aralar2 [OS=Homo sapiens]	FALSK	0	88,62881349	31,06508876	18	62	12	1	676	74,257	8,62	High	High	High	High	High	High	High	High	High	High	High	High	High	High	High	High	High	High	High	High		10165	ENSG00000004864.13	SLC25A13	7	metabolic process;response to stimulus;transport	membrane;mitochondrion	metal ion binding;structural molecule activity;transporter activity	Pf00153, Pf13499	0,415	-1,27	58,6	141,4	5,83
FALSK	High	Master Protein	A4Z6H0	Adenylosuccinate synthetase isozyme 1 [OS=Sus scrofa]	FALSK	0	25,06840335	17,94310722	6	12	6	1	457	50,067	8,51	High	High	High	High	High	High	High	High	High	High	High	High	High	High	High	High	High	High	High	High		100048943		ADSSL1	7	metabolic process	cytoplasm	catalytic activity;metal ion binding;nucleotide binding	Pf00709	0,415	-1,27	58,7	141,3	5,65
FALSK	High	Master Protein	O94856-9	Isoform 9 of Neurofascin [OS=Homo sapiens]	FALSK	0	61,66819013	15,32258065	14	29	14	1	1240	137,523	6,14	High	High	High	High	High	High	High	High	High	High	High	High	High	High	High	High	High	High	High	High		23114	ENSG00000163531.15	NFASC	1	cell organization and biogenesis;cellular component movement;transport	membrane	protein binding	Pf00041, Pf00047, Pf07679, Pf07686, Pf13882, Pf13895, Pf13927	0,416	-1,27	58,7	141,3	8,47
FALSK	High	Master Protein	P38606	V-type proton ATPase catalytic subunit A [OS=Homo sapiens]	FALSK	0	103,6883142	39,7082658	19	115	3	1	617	68,26	5,52	High	High	High	High	High	High	High	High	High	High	High	High	High	High	High	High	High	High	High	High		523	ENSG00000114573.9	ATP6V1A	3	cellular homeostasis;metabolic process;regulation of biological process;response to stimulus;transport	cytosol;membrane;mitochondrion	catalytic activity;nucleotide binding;transporter activity	Pf00006, Pf00306, Pf02874	0,416	-1,26	58,8	141,2	20,55
FALSK	High	Master Protein	Q9Y4W6	AFG3-like protein 2 [OS=Homo sapiens]	FALSK	0	95,29196867	33,8770389	23	56	22	1	797	88,528	8,66	High	High	High	High	High	High	High	High	High	High	High	High	High	High	High	High	High	High	High	High		10939	ENSG00000141385.9	AFG3L2	18	cell organization and biogenesis;cellular homeostasis;metabolic process;regulation of biological process;response to stimulus;transport	membrane;mitochondrion	catalytic activity;metal ion binding;nucleotide binding;protein binding	Pf00004, Pf01078, Pf01434, Pf05496, Pf06068, Pf06480, Pf07724, Pf07728, Pf13191, Pf13401	0,416	-1,26	58,8	141,2	6,37
FALSK	High	Master Protein	Q9UQ16-4	Isoform 4 of Dynamin-3 [OS=Homo sapiens]	FALSK	0	108,2496543	36,42611684	25	97	13	1	873	98,098	8,46	High	High	High	High	High	High	High	High	High	High	High	High	High	High	High	High	High	High	High	High		26052		DNM3	1	cell organization and biogenesis;regulation of biological process;transport	Golgi;mitochondrion	catalytic activity;nucleotide binding;protein binding	Pf00169, Pf00350, Pf01031, Pf02212	0,417	-1,26	58,8	141,2	9,12
FALSK	High	Master Protein	Q9BWM7	Sideroflexin-3 [OS=Homo sapiens]	FALSK	0	26,82211109	23,07692308	6	20	5	1	325	35,956	9,09	High	High	High	High	High	High	High	High	High	High	High	High	High	High	High	High	High	High	High	High		81855	ENSG00000107819.13	SFXN3	10	transport	membrane;mitochondrion	transporter activity	Pf03820	0,417	-1,26	58,9	141,1	8,21
FALSK	High	Master Protein	Q9NX63	MICOS complex subunit MIC19 [OS=Homo sapiens]	FALSK	0	13,73288458	11,89427313	3	17	3	1	227	26,136	8,28	High	High	High	High	High	High	High	High	High	High	High	High	High	High	High	High	High	High	High	High		54927	ENSG00000106554.11	CHCHD3	7	cell organization and biogenesis;metabolic process;regulation of biological process	cytoplasm;membrane;mitochondrion;nucleus	protein binding;structural molecule activity	Pf05300, Pf06747	0,417	-1,26	58,9	141,1	7,16
FALSK	High	Master Protein	Q7Z6J6-1	FERM domain-containing protein 5 [OS=Homo sapiens]	FALSK	0	13,82701729	7,01754386	3	4	3	1	570	65,023	8,35	High	High	High	High	High	High	High	High	High	High	High	High	High	High	High	High	High	High	High	High		84978	ENSG00000171877.20	FRMD5	15	cell organization and biogenesis	cytoplasm;cytoskeleton;membrane	protein binding;structural molecule activity	Pf00373, Pf08736, Pf09379, Pf09380	0,417	-1,26	58,9	141,1	18,86
FALSK	High	Master Protein	Q8IYQ7	Threonine synthase-like 1 [OS=Homo sapiens]	FALSK	0	27,64574802	8,479138627	5	15	5	1	743	83,017	7,12	High	High	High	High	High	High	High	High	High	High	High	High	High	High	High	High	High	High	High	High		79896	ENSG00000185875.12	THNSL1	10	metabolic process	cytoplasm;mitochondrion;nucleus	catalytic activity;nucleotide binding	Pf00004, Pf00291, Pf01202, Pf13207, Pf13238, Pf13671, Pf14821	0,418	-1,26	59	141	13,38
FALSK	High	Master Protein	Q969M1	Mitochondrial import receptor subunit TOM40B [OS=Homo sapiens]	FALSK	0	12,22641481	12,98701299	3	6	3	1	308	33,895	7,24	High	High	High	High	High	High	High	High	High	High	High	High	High	High	High	High	High	High	High	High		84134	ENSG00000158882.13	TOMM40L	1	transport	membrane;mitochondrion	transporter activity	Pf01459	0,419	-1,26	59,1	140,9	11,31
FALSK	High	Master Protein	Q9H9P8-1	L-2-hydroxyglutarate dehydrogenase, mitochondrial [OS=Homo sapiens]	FALSK	0	29,94637387	22,03023758	7	16	7	1	463	50,284	8,15	High	High	High	High	High	High	High	High	High	High	High	High	High	High	High	High	High	High	High	High		79944	ENSG00000087299.11	L2HGDH	14	metabolic process	membrane;mitochondrion	catalytic activity	Pf01266	0,42	-1,25	59,2	140,8	11,25
FALSK	High	Master Protein	Q8TB36	ganglioside-induced differentiation-associated protein 1 [OS=Homo sapiens]	FALSK	0	18,78390272	20,67039106	6	17	6	1	358	41,32	8,34	High	High	High	High	High	High	High	High	High	High	High	High	High	High	High	High	High	High	High	High		54332	ENSG00000104381.12	GDAP1	8	cell organization and biogenesis;metabolic process;response to stimulus;transport	cytoplasm;membrane;mitochondrion;nucleus	catalytic activity;protein binding	Pf00043, Pf02798, Pf13409, Pf13410, Pf13417, Pf14497	0,42	-1,25	59,2	140,8	9,6
FALSK	High	Master Protein	Q86WA6	valacyclovir hydrolase [OS=Homo sapiens]	FALSK	0,001377158	4,030323263	5,154639175	2	8	2	1	291	32,522	9,14	High	High	High	High	High	High	High	High	High	High	High	High	High	High	High	High	High	High	High	High		670	ENSG00000137274.12	BPHL	6	metabolic process;response to stimulus	membrane;mitochondrion	catalytic activity	Pf00561, Pf01738, Pf12695, Pf12697	0,42	-1,25	59,2	140,8	21,86
FALSK	High	Master Protein	Q9Y5J7	Mitochondrial import inner membrane translocase subunit Tim9 [OS=Homo sapiens]	FALSK	0	14,98990787	29,21348315	2	8	2	1	89	10,371	7,21	High	High	High	High	High	High	High	High	High	High	High	High	High	High	High	High	High	High	High	High		26520	ENSG00000100575.13	TIMM9	14	cell organization and biogenesis;transport	membrane;mitochondrion	metal ion binding;protein binding;transporter activity	Pf02953	0,421	-1,25	59,2	140,8	9,94
FALSK	High	Master Protein	Q684P5	Rap1 GTPase-activating protein 2 [OS=Homo sapiens]	FALSK	0,000112082	7,178355876	4,383561644	3	5	2	1	730	80,006	6,67	High	High	High	High	High	High	High	High	High	High	High	High	High	High	High	High	High	High	High	High		23108	ENSG00000132359.14	RAP1GAP2	17	cell organization and biogenesis;regulation of biological process	cytoplasm;cytosol;membrane	enzyme regulator activity;protein binding	Pf02145	0,421	-1,25	59,3	140,7	13,34
FALSK	High	Master Protein	Q8IXI2-1	Mitochondrial Rho GTPase 1 [OS=Homo sapiens]	FALSK	0	57,28412695	34,95145631	14	37	1	1	618	70,739	6,27	High	High	High	High	High	High	High	High	High	High	High	High	High	High	High	High	High	High	High	High		55288	ENSG00000126858.16	RHOT1	17	cell organization and biogenesis;cellular component movement;cellular homeostasis;regulation of biological process;response to stimulus;transport	cytosol;membrane;mitochondrion	catalytic activity;metal ion binding;nucleotide binding;protein binding	Pf00071, Pf08355, Pf08356, Pf08477	0,422	-1,25	59,3	140,7	20,19
FALSK	High	Master Protein	P47870-1	Isoform 2 of Gamma-aminobutyric acid receptor subunit beta-2 [OS=Homo sapiens]	FALSK	0	26,67718741	16,4556962	6	14	4	1	474	54,571	9,32	High	High	High	High	High	High	High	High	High	High	High	High	High	High	High	High	High	High	High	High		2561	ENSG00000145864.12	GABRB2	5	cell communication;regulation of biological process;response to stimulus;transport	cytosol;membrane	receptor activity;signal transducer activity;transporter activity	Pf02931, Pf02932	0,422	-1,25	59,3	140,7	47,53
FALSK	High	Master Protein	Q16595-1	Frataxin, mitochondrial [OS=Homo sapiens]	FALSK	0	12,67225985	10,95238095	2	4	2	1	210	23,121	8,69	High	High	High	High	High	High	High	High	High	High	High	High	High	High	High	High	High	High	High	High		2395	ENSG00000165060.11	FXN	9	cell organization and biogenesis;cellular homeostasis;metabolic process;regulation of biological process;response to stimulus;transport	cytoplasm;cytosol;mitochondrion;organelle lumen	catalytic activity;metal ion binding;protein binding	Pf01491	0,422	-1,25	59,3	140,7	24,2
FALSK	High	Master Protein	Q99962	Endophilin-A1 [OS=Homo sapiens]	FALSK	0	74,47716272	46,875	13	87	9	1	352	39,937	5,45	High	High	High	High	High	High	High	High	High	High	High	High	High	High	High	High	High	High	High	High		6456	ENSG00000107295.9	SH3GL2	9	cellular component movement;regulation of biological process;response to stimulus;transport	cytoplasm;cytosol;membrane	protein binding	Pf00018, Pf03114, Pf07653, Pf10455, Pf14604	0,422	-1,24	59,3	140,7	11,21
FALSK	High	Master Protein	Q02978	Mitochondrial 2-oxoglutarate/malate carrier protein [OS=Homo sapiens]	FALSK	0	25,66905955	21,01910828	5	17	5	1	314	34,04	9,91	High	High	High	High	High	High	High	High	High	High	High	High	High	High	High	High	High	High	High	High		8402	ENSG00000108528.13	SLC25A11	17	metabolic process;transport	membrane;mitochondrion;nucleus	RNA binding;structural molecule activity;transporter activity	Pf00153	0,422	-1,24	59,4	140,6	13,09
FALSK	High	Master Protein	P14415	sodium/potassium-transporting ATPase subunit beta-2 [OS=Homo sapiens]	FALSK	0	32,39440019	22,06896552	6	40	6	1	290	33,345	8,31	High	High	High	High	High	High	High	High	High	High	High	High	High	High	High	High	High	High	High	High		482	ENSG00000129244.8	ATP1B2	17	cell communication;cellular component movement;cellular homeostasis;regulation of biological process;transport	cytoplasm;membrane	catalytic activity;enzyme regulator activity;protein binding;transporter activity	Pf00287	0,423	-1,24	59,4	140,6	11,38
FALSK	High	Master Protein	Q9P1U1-1	Actin-related protein 3B [OS=Homo sapiens]	FALSK	0	31,84981358	23,92344498	7	23	4	1	418	47,577	5,88	Not Found	Not Found	Not Found	Not Found	Not Found	High	High	High	High	High	Not Found	Not Found	High	Not Found	Not Found	High	High	High	High	High		57180	ENSG00000133627.17	ACTR3B	7	cell organization and biogenesis;regulation of biological process	cytoplasm;cytoskeleton	nucleotide binding;protein binding	Pf00022	0,424	-1,24	59,5	140,5	14,02
FALSK	High	Master Protein	O95847	Mitochondrial uncoupling protein 4 [OS=Homo sapiens]	FALSK	0,000112082	7,347072863	9,287925697	2	3	2	1	323	36,041	9,07	High	High	Not Found	High	High	High	High	High	High	High	High	High	High	High	High	High	High	High	High	High		9481	ENSG00000153291.15	SLC25A27	6	cell death;cellular homeostasis;metabolic process;regulation of biological process;transport	membrane;mitochondrion	structural molecule activity	Pf00153	0,424	-1,24	59,5	140,5	24,89
FALSK	High	Master Protein	O76070	Gamma-synuclein [OS=Homo sapiens]	FALSK	0	20,40175855	26,77165354	3	38	2	1	127	13,323	4,86	High	High	High	High	High	High	High	High	High	High	High	High	High	High	High	High	High	High	High	High		6623	ENSG00000173267.13	SNCG	10	cell communication;cell organization and biogenesis;regulation of biological process;response to stimulus;transport	cytoplasm;cytoskeleton	protein binding	Pf01387	0,426	-1,23	59,7	140,3	41,89
FALSK	High	Master Protein	Q29048	V-type proton ATPase catalytic subunit A [OS=Sus scrofa]	FALSK	0	108,0425273	37,27714749	20	122	4	1	617	68,275	5,58	High	High	High	High	High	High	High	High	High	High	High	High	High	High	High	High	High	High	High	High		445531		ATP6V1A	13	metabolic process;transport	cytosol;membrane	catalytic activity;nucleotide binding;transporter activity	Pf00006, Pf00306, Pf02874	0,426	-1,23	59,7	140,3	4,09
FALSK	High	Master Protein	Q5TBA9	Protein furry homolog [OS=Homo sapiens]	FALSK	0	14,42047209	1,858612678	5	8	5	1	3013	338,659	5,99	High	High	High	High	High	High	High	High	High	High	High	High	High	High	High	High	High	High	High	High		10129	ENSG00000073910.19	FRY	13	cell organization and biogenesis;regulation of biological process	cytoplasm;cytoskeleton	enzyme regulator activity	Pf14222, Pf14225, Pf14228	0,426	-1,23	59,8	140,2	12,57
FALSK	High	Master Protein	Q16891	MICOS complex subunit Mic60 [OS=Homo sapiens]	FALSK	0	41,72972686	17,01846966	13	35	13	1	758	83,626	6,48	High	High	High	High	High	High	High	High	High	High	High	High	High	High	High	High	High	High	High	High		10989	ENSG00000132305.20	IMMT	2	cell organization and biogenesis;cellular homeostasis	membrane;mitochondrion	protein binding;RNA binding	Pf09731	0,427	-1,23	59,9	140,1	7,88
FALSK	High	Master Protein	P42262-3	Isoform 3 of Glutamate receptor 2 [OS=Homo sapiens]	FALSK	0	35,25576475	15,09433962	9	13	6	1	901	100,53	7,59	High	High	High	High	High	High	High	High	High	High	High	High	High	High	High	High	High	High	High	High						transport	membrane	receptor activity;signal transducer activity;transporter activity	Pf00060, Pf00497, Pf01094, Pf10613, Pf13458	0,427	-1,23	59,9	140,1	26,21
FALSK	High	Master Protein	P30042-1	ES1 protein homolog, mitochondrial [OS=Homo sapiens]	FALSK	0	10,91208885	9,328358209	2	9	2	1	268	28,153	8,27	High	High	High	High	High	High	High	High	High	High	High	High	High	High	High	High	High	High	High	High		8209; 102724023	ENSG00000160221.16	C21orf33; LOC102724023	21		mitochondrion		Pf01965	0,427	-1,23	59,9	140,1	9,86
FALSK	High	Master Protein	P52306-2	Isoform 2 of Rap1 GTPase-GDP dissociation stimulator 1 [OS=Homo sapiens]	FALSK	0	84,7865729	44,26523297	17	69	3	1	558	60,998	5,44	High	High	High	High	High	High	High	High	High	High	High	High	High	High	High	High	High	High	High	High	Acetyl [N-Term]	5910	ENSG00000138698.14	RAP1GDS1	4	cellular homeostasis;regulation of biological process;response to stimulus	cytosol;endoplasmic reticulum;mitochondrion	enzyme regulator activity;protein binding	Pf00514	0,429	-1,22	60	140	5,52
FALSK	High	Master Protein	O76041-2	Isoform 2 of Nebulette [OS=Homo sapiens]	FALSK	0	37,76038518	39,62962963	9	24	8	1	270	31,176	8,31	High	High	High	High	High	High	High	High	High	High	High	High	High	High	High	High	High	High	High	High		10529	ENSG00000078114.18	NEBL	10	cell organization and biogenesis		metal ion binding;protein binding;structural molecule activity	Pf00018, Pf00412, Pf00880, Pf07653, Pf14604	0,429	-1,22	60	140	12,94
FALSK	High	Master Protein	O75323-1	Protein NipSnap homolog 2 [OS=Homo sapiens]	FALSK	0	27,47551728	34,96503497	6	20	5	1	286	33,721	9,36	High	High	High	High	High	High	High	High	High	High	High	High	High	High	High	High	High	High	High	High		2631	ENSG00000146729.9	GBAS	7	metabolic process;regulation of biological process	membrane;mitochondrion	protein binding	Pf07978	0,429	-1,22	60,1	139,9	10,4
FALSK	High	Master Protein	Q15388	Mitochondrial import receptor subunit TOM20 homolog [OS=Homo sapiens]	FALSK	0	8,557655087	22,75862069	2	15	2	1	145	16,288	8,6	High	High	High	High	High	High	High	High	High	High	High	High	High	High	High	High	High	High	High	High		9804	ENSG00000173726.10	TOMM20	1	cell communication;cell organization and biogenesis;metabolic process;response to stimulus;transport	membrane;mitochondrion	protein binding;transporter activity	Pf02064	0,43	-1,22	60,1	139,9	15,54
FALSK	High	Master Protein	Q96MZ0-4	Isoform 3 of Ganglioside-induced differentiation-associated protein 1-like 1 [OS=Homo sapiens]	FALSK	0,000112082	7,440116358	7,512953368	2	4	2	1	386	43,795	6,84	High	High	High	High	High	High	High	High	High	High	High	High	High	High	High	High	High	High	High	High		78997	ENSG00000124194.16	GDAP1L1	20	metabolic process	cytoplasm	catalytic activity;protein binding	Pf00043, Pf02798, Pf13409, Pf13410, Pf13417	0,43	-1,22	60,1	139,9	21,04
FALSK	High	Master Protein	Q9GL76	Nectin-1 [OS=Sus scrofa]	FALSK	0	28,09832345	10,09708738	3	8	3	1	515	57,011	6,19	High	High	High	High	High	High	High	High	High	High	High	High	High	High	High	High	High	High	High	High		100522562; 397247		LOC100522562; PVRL1; NECTIN1	9	regulation of biological process	membrane	protein binding;receptor activity	Pf00047, Pf07679, Pf07686, Pf08205, Pf13895, Pf13927	0,43	-1,22	60,2	139,8	15,4
FALSK	High	Master Protein	P78352-2	Isoform 2 of Disks large homolog 4 [OS=Homo sapiens]	FALSK	0	80,97090834	34,15906128	18	48	15	1	767	85,377	5,87	High	High	High	High	High	High	High	High	High	High	High	High	High	High	High	High	High	High	High	High		1742	ENSG00000132535.18	DLG4	17	cell communication;cell organization and biogenesis;cellular homeostasis;metabolic process;regulation of biological process;response to stimulus;transport	cytoplasm;cytoskeleton;endoplasmic reticulum;membrane	catalytic activity;protein binding;transporter activity	Pf00018, Pf00595, Pf00625, Pf07653, Pf09058, Pf10600, Pf10608, Pf13180, Pf14604	0,43	-1,22	60,2	139,8	9,04
FALSK	High	Master Protein	Q9N0F1	Dihydrolipoyllysine-residue succinyltransferase component of 2-oxoglutarate dehydrogenase complex, mitochondrial [OS=Sus scrofa]	FALSK	0	45,51024397	25,93406593	9	41	9	1	455	48,946	8,82	High	High	High	High	High	High	High	High	High	High	High	High	High	High	High	High	High	High	High	High		397690	ENSSSCG00000002374.2	DLST	7	metabolic process	membrane;mitochondrion;nucleus	catalytic activity	Pf00198, Pf00364	0,431	-1,21	60,3	139,7	9,48
FALSK	High	Master Protein	P51513-1	RNA-binding protein Nova-1 [OS=Homo sapiens]	FALSK	0	16,20203163	10,98039216	5	9	2	1	510	52,024	8,88	High	High	High	High	High	High	High	High	High	High	High	High	High	High	High	High	High	High	High	High		4857		NOVA1	14	cell communication;metabolic process;regulation of biological process;response to stimulus	nucleus	RNA binding	Pf00013, Pf13014	0,431	-1,21	60,3	139,7	17,25
FALSK	High	Master Protein	Q9Y6M7-7	Isoform 7 of Sodium bicarbonate cotransporter 3 [OS=Homo sapiens]	FALSK	0	39,32135949	8,419380461	10	16	6	1	1259	140,677	6,62	High	High	High	High	High	High	High	High	High	High	High	High	High	High	High	High	High	High	High	High		9497	ENSG00000033867.16	SLC4A7	3	cellular homeostasis;transport	membrane	transporter activity	Pf00359, Pf00955, Pf07565	0,432	-1,21	60,4	139,6	8,43
FALSK	High	Master Protein	Q9UBB6-3	Isoform 3 of Neurochondrin [OS=Homo sapiens]	FALSK	0	74,63326879	32,96853625	18	35	18	1	731	79,107	5,55	High	High	High	High	High	High	High	High	High	High	High	High	High	High	High	High	High	High	High	High		23154		NCDN	1	cell organization and biogenesis;regulation of biological process	cytosol;membrane;nucleus	protein binding	Pf05536	0,433	-1,21	60,5	139,5	8,84
FALSK	High	Master Protein	P60520	Gamma-aminobutyric acid receptor-associated protein-like 2 [OS=Homo sapiens]	FALSK	0	18,41314698	41,88034188	6	14	5	1	117	13,658	8,1	High	High	High	High	High	High	High	High	High	High	High	High	High	High	High	High	High	High	High	High		11345	ENSG00000034713.7	GABARAPL2	16	cell communication;cell organization and biogenesis;metabolic process;regulation of biological process;response to stimulus;transport	cytoplasm;cytosol;Golgi;membrane;vacuole	protein binding	Pf02991, Pf04110	0,434	-1,21	60,5	139,5	5,25
FALSK	High	Master Protein	Q08174-2	Isoform 2 of Protocadherin-1 [OS=Homo sapiens]	FALSK	0	15,19538676	4,365400162	4	7	4	1	1237	133,64	5,06	High	High	High	High	High	High	High	High	High	High	High	High	High	High	High	High	High	High	High	High		5097	ENSG00000156453.13	PCDH1	5	cell communication	membrane	metal ion binding	Pf00028, Pf08266, Pf08374	0,434	-1,2	60,5	139,5	15,68
FALSK	High	Master Protein	Q8WWC4	m-AAA protease-interacting protein 1, mitochondrial [OS=Homo sapiens]	FALSK	0,000396275	6,809969807	8,24742268	2	5	2	1	291	32,524	9,17	High	High	High	High	High	High	High	High	High	High	High	High	High	High	High	High	High	High	High	High		79568	ENSG00000162972.10	C2orf47	2	cell organization and biogenesis;cellular homeostasis;transport	membrane;mitochondrion;organelle lumen	protein binding		0,434	-1,2	60,6	139,4	9,87
FALSK	High	Master Protein	Q8NE35-1	Cytoplasmic polyadenylation element-binding protein 3 [OS=Homo sapiens]	FALSK	0	21,79299361	13,61031519	6	10	3	1	698	75,966	7,03	High	High	High	High	High	High	High	High	High	High	High	High	High	High	High	High	High	High	High	High	Acetyl [N-Term]	22849	ENSG00000107864.14	CPEB3	10	metabolic process;regulation of biological process;response to stimulus	cytoplasm;membrane;nucleus	nucleotide binding;protein binding;RNA binding;translation regulator activity	Pf00076, Pf14259	0,435	-1,2	60,6	139,4	19,25
FALSK	High	Master Protein	Q53H12	Acylglycerol kinase, mitochondrial [OS=Homo sapiens]	FALSK	0	15,9137876	12,32227488	4	10	4	1	422	47,107	8,09	High	High	High	High	High	High	High	High	High	High	High	High	High	High	High	High	High	High	High	High		55750	ENSG00000006530.15	AGK	7	metabolic process	membrane;mitochondrion	catalytic activity;nucleotide binding	Pf00781	0,435	-1,2	60,6	139,4	9,63
FALSK	High	Master Protein	Q14141-1	Septin-6 [OS=Homo sapiens]	FALSK	0	74,88542062	35,48387097	12	63	5	1	434	49,685	6,67	High	High	High	High	High	High	High	High	High	High	High	High	High	High	High	High	High	High	High	High		23157	ENSG00000125354.22	sep-06	X	cell division	chromosome;cytoplasm;cytoskeleton	nucleotide binding;protein binding	Pf00735	0,435	-1,2	60,7	139,3	12,01
FALSK	High	Master Protein	O94911-3	Isoform 3 of ATP-binding cassette sub-family A member 8 [OS=Homo sapiens]	FALSK	0	8,564556204	1,727328809	2	5	2	1	1621	183,558	7,25	High	High	High	High	High	High	High	High	High	High	High	High	High	High	High	High	High	High	High	High		10351	ENSG00000141338.13	ABCA8	17	transport	membrane	catalytic activity;nucleotide binding;transporter activity	Pf00005, Pf03193, Pf12698, Pf12730, Pf13304	0,435	-1,2	60,7	139,3	55,53
FALSK	High	Master Protein	Q01814-2	Isoform WA of Plasma membrane calcium-transporting ATPase 2 [OS=Homo sapiens]	FALSK	0	87,90833663	21,60133445	19	61	12	1	1199	131,534	6,24	High	High	High	High	High	High	High	High	High	High	High	High	High	High	High	High	High	High	High	High		491		ATP2B2	3	cell differentiation;cell organization and biogenesis;cellular homeostasis;metabolic process;regulation of biological process;response to stimulus;transport	cytoplasm;endoplasmic reticulum;membrane	catalytic activity;metal ion binding;nucleotide binding;protein binding;transporter activity	Pf00122, Pf00689, Pf00690, Pf00702, Pf08282, Pf12424, Pf12710, Pf13246	0,436	-1,2	60,8	139,2	7,33
FALSK	High	Master Protein	Q5SZQ8	CUGBP Elav-like family member 3 [OS=Homo sapiens]	FALSK	0	7,658114459	4,731182796	2	4	2	1	465	50,515	8,53	High	High	High	High	High	High	High	High	High	High	High	High	High	High	High	High	High	High	High	High		11189	ENSG00000159409.14	CELF3	1	cell organization and biogenesis;cellular component movement;metabolic process;regulation of biological process	cytoplasm;nucleus	nucleotide binding;RNA binding	Pf00076, Pf13893, Pf14259	0,436	-1,2	60,8	139,2	13,05
FALSK	High	Master Protein	Q96FJ2	Dynein light chain 2, cytoplasmic [OS=Homo sapiens]	FALSK	0	39,44226805	44,94382022	3	102	2	1	89	10,343	7,37	High	High	High	High	High	High	High	High	High	High	High	High	High	High	High	High	High	High	High	High		140735	ENSG00000264364.2	DYNLL2	17	cell communication;metabolic process;regulation of biological process;response to stimulus;transport	cytoplasm;cytoskeleton;cytosol;membrane;mitochondrion;nucleus	catalytic activity;motor activity;protein binding	Pf01221	0,437	-1,2	60,8	139,2	8,76
FALSK	High	Master Protein	Q9H4G0-1	Band 4.1-like protein 1 [OS=Homo sapiens]	FALSK	0	78,3675199	25,31214529	18	56	15	1	881	98,442	5,62	High	High	High	High	High	High	High	High	High	High	High	High	High	High	High	High	High	High	High	High		2036	ENSG00000088367.21	EPB41L1	20	cell organization and biogenesis	cytoplasm;cytoskeleton;cytosol;membrane	protein binding;structural molecule activity	Pf00373, Pf04382, Pf05902, Pf08736, Pf09379, Pf09380	0,438	-1,19	60,9	139,1	10,74
FALSK	High	Master Protein	Q14894	Ketimine reductase mu-crystallin [OS=Homo sapiens]	FALSK	0	10,67060236	8,917197452	3	49	3	1	314	33,754	5,14	High	High	High	High	High	High	High	High	High	High	High	High	High	High	High	High	High	High	High	High		1428	ENSG00000103316.10	CRYM	16	metabolic process;regulation of biological process;transport	cytoplasm;mitochondrion;nucleus;organelle lumen	catalytic activity;nucleotide binding;protein binding	Pf01488, Pf02423, Pf03446, Pf03807	0,438	-1,19	60,9	139,1	16,26
FALSK	High	Master Protein	O94826	Mitochondrial import receptor subunit TOM70 [OS=Homo sapiens]	FALSK	0	99,80938976	55,75657895	25	78	25	1	608	67,412	7,12	High	High	High	High	High	High	High	High	High	High	High	High	High	High	High	High	High	High	High	High		9868	ENSG00000154174.7	TOMM70A; TOMM70	3	cell communication;metabolic process;response to stimulus;transport	membrane;mitochondrion	protein binding;transporter activity	Pf00515, Pf07719, Pf13414, Pf13424	0,44	-1,19	61,1	138,9	10,71
FALSK	High	Master Protein	Q9MZ15	Voltage-dependent anion-selective channel protein 2 [OS=Sus scrofa]	FALSK	0	120,4706515	65,6462585	16	156	16	1	294	31,573	7,56	High	High	High	High	High	High	High	High	High	High	High	High	High	High	High	High	High	High	High	High		397659		VDAC2	14	regulation of biological process;transport	membrane;mitochondrion	nucleotide binding;transporter activity	Pf01459	0,44	-1,18	61,1	138,9	15,43
FALSK	High	Master Protein	P80147	4-aminobutyrate aminotransferase, mitochondrial [OS=Sus scrofa]	FALSK	0	131,4089489	63,2	22	94	22	1	500	56,584	8,25	High	High	High	High	High	High	High	High	High	High	High	High	High	High	High	High	High	High	High	High		397500		ABAT	3	metabolic process;response to stimulus	cytosol;mitochondrion;organelle lumen	catalytic activity;metal ion binding;protein binding	Pf00202	0,44	-1,18	61,1	138,9	14,76
FALSK	High	Master Protein	P26232	Catenin alpha-2 [OS=Homo sapiens]	FALSK	0	119,5897683	31,58447009	23	56	16	1	953	105,247	5,71	High	High	High	High	High	High	High	High	High	High	High	High	High	High	High	High	High	High	High	High		1496	ENSG00000066032.18	CTNNA2	2	cell differentiation;cell organization and biogenesis;cellular component movement;development;regulation of biological process	cytoplasm;cytoskeleton;cytosol;membrane;nucleus	protein binding;structural molecule activity	Pf01044	0,44	-1,18	61,1	138,9	15,2
FALSK	High	Master Protein	P51553-1	isocitrate dehydrogenase [NAD] subunit gamma, mitochondrial [OS=Homo sapiens]	FALSK	0	28,07789707	24,68193384	6	15	4	1	393	42,767	8,5	High	High	High	High	High	High	High	High	High	High	High	High	High	High	High	High	High	High	High	High		3421	ENSG00000067829.18	IDH3G	X	metabolic process;regulation of biological process	mitochondrion;organelle lumen	catalytic activity;metal ion binding;nucleotide binding	Pf00180	0,441	-1,18	61,2	138,8	34,74
FALSK	High	Master Protein	P11137	microtubule-associated protein 2 [OS=Homo sapiens]	FALSK	0	110,1168078	18,00766284	24	79	13	1	1827	199,404	4,91	High	High	High	High	High	High	High	High	High	High	High	High	High	High	High	High	High	High	High	High		4133	ENSG00000078018.19	MAP2	2	cell organization and biogenesis	cytoplasm;cytoskeleton	protein binding;structural molecule activity	Pf00418, Pf08377	0,441	-1,18	61,2	138,8	13,23
FALSK	High	Master Protein	P20020	Plasma membrane calcium-transporting ATPase 1 [OS=Homo sapiens]	FALSK	0	135,8711473	25,75516693	24	89	2	1	1258	138,668	6,04	High	High	High	High	High	High	High	High	High	High	High	High	High	High	High	High	High	High	High	High		490		ATP2B1	12	cell communication;cellular homeostasis;response to stimulus;transport	membrane;nucleus	catalytic activity;metal ion binding;nucleotide binding;protein binding;transporter activity	Pf00122, Pf00689, Pf00690, Pf00702, Pf08282, Pf12424, Pf12710, Pf13246	0,442	-1,18	61,3	138,7	6,9
FALSK	High	Master Protein	Q16720-1	Plasma membrane calcium-transporting ATPase 3 [OS=Homo sapiens]	FALSK	0	45,96468276	10,40983607	10	30	3	1	1220	134,112	5,62	High	High	High	High	High	High	High	High	High	High	High	High	High	High	High	High	High	High	High	High		492	ENSG00000067842.17	ATP2B3	X	cellular homeostasis;transport	Golgi;membrane	catalytic activity;metal ion binding;nucleotide binding;protein binding;transporter activity	Pf00122, Pf00689, Pf00690, Pf00702, Pf08282, Pf12424, Pf12710, Pf13246	0,442	-1,18	61,3	138,7	21,01
FALSK	High	Master Protein	Q92796	Disks large homolog 3 [OS=Homo sapiens]	FALSK	0	18,00482074	7,221542228	4	9	3	1	817	90,258	7,03	High	High	High	High	High	High	High	High	High	High	High	High	High	High	High	High	High	High	High	High		1741	ENSG00000082458.11	DLG3	X	cell communication;cell organization and biogenesis;metabolic process;regulation of biological process;transport	cytoplasm;membrane	catalytic activity;protein binding;transporter activity	Pf00018, Pf00595, Pf00625, Pf07653, Pf10368, Pf10600, Pf13180	0,442	-1,18	61,3	138,7	15,76
FALSK	High	Master Protein	P08574	Cytochrome c1, heme protein, mitochondrial [OS=Homo sapiens]	FALSK	0	32,34586303	23,38461538	4	16	4	1	325	35,399	9	High	High	High	High	High	High	High	High	High	High	High	High	High	High	High	High	High	High	High	High		1537	ENSG00000179091.4	CYC1	8	metabolic process;response to stimulus;transport	membrane;mitochondrion;nucleus	metal ion binding	Pf02167	0,443	-1,18	61,4	138,6	16,99
FALSK	High	Master Protein	Q8N9R8-2	Isoform 2 of Protein SCAI [OS=Homo sapiens]	FALSK	0	19,3892021	9,06200318	6	12	6	1	629	72,888	8,5	High	High	High	High	High	High	High	High	High	High	High	High	High	High	High	High	High	High	High	High		286205	ENSG00000173611.17	SCAI	9	metabolic process;regulation of biological process	cytoplasm;membrane;nucleus	protein binding	Pf12070	0,443	-1,18	61,4	138,6	15,34
FALSK	High	Master Protein	Q5TF21	Protein SOGA3 [OS=Homo sapiens]	FALSK	0	35,07570082	12,46040127	10	16	10	1	947	103,136	6,06	High	High	High	High	High	High	High	High	High	High	High	High	High	High	High	High	High	High	High	High		387104	ENSG00000255330.9; ENSG00000214338.10	SOGA3	6	metabolic process;regulation of biological process	membrane		Pf04111, Pf10174, Pf10186, Pf11180, Pf11365	0,444	-1,17	61,5	138,5	19,69
FALSK	High	Master Protein	O75525-1	KH domain-containing, RNA-binding, signal transduction-associated protein 3 [OS=Homo sapiens]	FALSK	0	8,568854137	7,225433526	3	10	2	1	346	38,776	7,61	High	High	High	High	High	High	High	High	High	High	High	High	High	High	High	High	High	High	High	High		10656	ENSG00000131773.13	KHDRBS3	8	metabolic process;regulation of biological process	nucleus	protein binding;RNA binding	Pf00013	0,444	-1,17	61,5	138,5	18,21
FALSK	High	Master Protein	P08559-4	Isoform 4 of Pyruvate dehydrogenase E1 component subunit alpha, somatic form, mitochondrial [OS=Homo sapiens]	FALSK	0	46,32106514	30,60747664	11	62	1	1	428	47,549	8,54	High	High	High	High	High	Not Found	Not Found	Not Found	Not Found	Not Found	High	High	High	High	High	Not Found	Not Found	Not Found	Not Found	Not Found		5160	ENSG00000131828.13	PDHA1	X	metabolic process;regulation of biological process	mitochondrion;nucleus;organelle lumen	catalytic activity	Pf00676	0,445	-1,17	61,5	138,5	20,24
FALSK	High	Master Protein	P79260	S-arrestin [OS=Sus scrofa]	FALSK	0	210,6957746	71,60493827	22	436	22	1	405	45,074	5,86	High	High	High	High	High	High	High	High	High	High	High	High	High	High	High	High	High	High	High	High		397151		SAG	15	regulation of biological process;response to stimulus			Pf00339, Pf02752	0,445	-1,17	61,6	138,4	23,21
FALSK	High	Master Protein	Q9NVI7-2	Isoform 2 of ATPase family AAA domain-containing protein 3A [OS=Homo sapiens]	FALSK	0	26,36970022	14,84641638	8	13	8	1	586	66,177	9,25	High	High	High	High	High	High	High	High	High	High	High	High	High	High	High	High	High	High	High	High		55210	ENSG00000197785.13	ATAD3A	1	cell growth;regulation of biological process	membrane;mitochondrion	catalytic activity;nucleotide binding;RNA binding	Pf00004, Pf00910, Pf01078, Pf05707, Pf06745, Pf07728, Pf12037, Pf13207, Pf13401	0,445	-1,17	61,6	138,4	13,07
FALSK	High	Master Protein	Q35914	ATP synthase protein 8 [OS=Sus scrofa]	FALSK	0	8,877442579	35,82089552	2	3	2	1	67	7,942	9,19	High	High	High	High	High	High	High	High	High	High	High	High	High	High	High	High	High	High	High	High		808505	ENSSSCG00000018080.1	ATP8	MT	metabolic process;transport	membrane;mitochondrion	catalytic activity;transporter activity	Pf00895	0,445	-1,17	61,6	138,4	60,12
FALSK	High	Master Protein	Q9BQI5-3	Isoform 3 of SH3-containing GRB2-like protein 3-interacting protein 1 [OS=Homo sapiens]	FALSK	0	39,56798595	15,83236321	8	23	8	1	859	92,588	8,4	High	High	High	High	High	High	High	High	High	High	High	High	High	High	High	High	High	High	High	High		84251	ENSG00000118473.21	SGIP1	1	cell organization and biogenesis;regulation of biological process;transport	cytoplasm;membrane	protein binding	Pf00928, Pf10291	0,445	-1,17	61,6	138,4	12,81
FALSK	High	Master Protein	Q6UAQ8	electron transfer flavoprotein subunit beta [OS=Sus scrofa]	FALSK	0	62,46292244	62,35294118	12	54	12	1	255	27,746	8,38	High	High	High	High	High	High	High	High	High	High	High	High	High	High	High	High	High	High	High	High		396614	ENSSSCG00000003229.3	ETFB	6	metabolic process;transport	mitochondrion;organelle lumen		Pf01012	0,445	-1,17	61,6	138,4	7,46
FALSK	High	Master Protein	P51674	Neuronal membrane glycoprotein M6-a [OS=Homo sapiens]	FALSK	0	25,12842087	22,30215827	6	31	6	1	278	31,188	5,27	High	High	High	High	High	High	High	High	High	High	High	High	High	High	High	High	High	High	High	High	Acetyl [N-Term]	2823	ENSG00000150625.16	GPM6A	4	cell differentiation;cell organization and biogenesis;cellular component movement;regulation of biological process;transport	membrane	protein binding;transporter activity	Pf01275	0,446	-1,16	61,7	138,3	10,14
FALSK	High	Master Protein	P32004	Neural cell adhesion molecule L1 [OS=Homo sapiens]	FALSK	0	18,32652738	5,171042164	7	15	7	1	1257	139,915	6,24	High	High	High	High	High	High	High	High	High	High	High	High	High	High	High	High	High	High	High	High		3897	ENSG00000198910.12	L1CAM	X	cell differentiation;cellular component movement;development;regulation of biological process;response to stimulus	cell surface;membrane	protein binding	Pf00041, Pf00047, Pf07679, Pf07686, Pf13882, Pf13895, Pf13927	0,446	-1,16	61,7	138,3	7,64
FALSK	High	Master Protein	Q8TDJ6-3	Isoform 3 of DmX-like protein 2 [OS=Homo sapiens]	FALSK	0	111,2501802	12,41356602	27	60	27	1	3037	339,514	6,38	High	High	High	High	High	High	High	High	High	High	High	High	High	High	High	High	High	High	High	High		23312	ENSG00000104093.13	DMXL2	15		membrane	protein binding	Pf00400, Pf12234	0,446	-1,16	61,7	138,3	7,54
FALSK	High	Master Protein	O60313-2	Isoform 2 of Dynamin-like 120 kDa protein, mitochondrial [OS=Homo sapiens]	FALSK	0	95,72295788	30,09027081	24	52	24	1	997	115,812	7,87	High	High	High	High	High	High	High	High	High	High	High	High	High	High	High	High	High	High	High	High		4976	ENSG00000198836.8	OPA1	3	cell death;cell organization and biogenesis;cellular component movement;regulation of biological process;response to stimulus;transport	cytoplasm;membrane;mitochondrion	catalytic activity;metal ion binding;nucleotide binding;protein binding	Pf00350, Pf01926	0,447	-1,16	61,7	138,3	12
FALSK	High	Master Protein	Q9Y512	sorting and assembly machinery component 50 homolog [OS=Homo sapiens]	FALSK	0	54,85094439	29,63752665	11	28	11	1	469	51,943	6,9	High	High	High	High	High	High	High	High	High	High	High	High	High	High	High	High	High	High	High	High		25813	ENSG00000100347.14	SAMM50	22	cell organization and biogenesis;transport	cytoplasm;membrane;mitochondrion	protein binding	Pf01103, Pf07244	0,447	-1,16	61,8	138,2	9,4
FALSK	High	Master Protein	Q9BPU6	Dihydropyrimidinase-related protein 5 [OS=Homo sapiens]	FALSK	0	45,76893011	25,70921986	12	30	12	1	564	61,382	7,2	High	High	High	High	High	High	High	High	High	High	High	High	High	High	High	High	High	High	High	High		56896	ENSG00000157851.16	DPYSL5	2	cellular component movement;regulation of biological process;response to stimulus	cytoplasm;cytosol	catalytic activity;protein binding	Pf01979, Pf13147, Pf13594	0,447	-1,16	61,8	138,2	9,12
FALSK	High	Master Protein	P10173	fumarate hydratase, mitochondrial [OS=Sus scrofa]	FALSK	0	101,8358239	49,57081545	14	74	2	1	466	49,978	7,42	High	High	High	High	High	Not Found	Not Found	Not Found	Not Found	Not Found	High	High	High	High	High	Not Found	Not Found	Not Found	Not Found	Not Found		100627128		FH	10	cell organization and biogenesis;metabolic process	cytosol;mitochondrion	catalytic activity	Pf00206, Pf10415	0,448	-1,16	61,9	138,1	11,3
FALSK	High	Master Protein	Q8WXG6-1	MAP kinase-activating death domain protein [OS=Homo sapiens]	FALSK	0	41,20909087	9,471766849	12	25	12	1	1647	183,188	6,04	High	High	High	High	High	High	High	High	High	High	High	High	High	High	High	High	High	High	High	High		8567	ENSG00000110514.19	MADD	11	cell death;regulation of biological process;response to stimulus	cytoplasm;cytosol;membrane	enzyme regulator activity;protein binding	Pf02141, Pf03455, Pf03456	0,449	-1,16	62	138	15,33
FALSK	High	Master Protein	Q16623	syntaxin-1A [OS=Homo sapiens]	FALSK	0,000112082	7,183036317	7,986111111	2	2	2	1	288	33,003	5,24	High	High	High	High	High	High	High	High	High	High	High	High	High	High	High	High	High	High	High	High		6804	ENSG00000106089.11	STX1A	7	cell organization and biogenesis;regulation of biological process;response to stimulus;transport	cytosol;extracellular;membrane	protein binding	Pf00804, Pf05739, Pf14523	0,449	-1,15	62	138	26,46
FALSK	High	Master Protein	O95140	Mitofusin-2 [OS=Homo sapiens]	FALSK	0	32,20855455	12,41743725	7	16	7	1	757	86,347	6,98	High	High	High	High	High	High	High	High	High	High	High	High	High	High	High	High	High	High	High	High		9927	ENSG00000116688.16	MFN2	1	cell communication;cell death;cell organization and biogenesis;coagulation;metabolic process;regulation of biological process;response to stimulus;transport	cytoskeleton;cytosol;membrane;mitochondrion	catalytic activity;nucleotide binding;protein binding	Pf00350, Pf01926, Pf04799	0,45	-1,15	62	138	13,03
FALSK	High	Master Protein	P36968	Phospholipid hydroperoxide glutathione peroxidase, mitochondrial [OS=Sus scrofa]	FALSK	0	41,77351634	49,23857868	10	31	10	1	197	22,323	8,37	High	High	High	High	High	High	High	High	High	High	High	High	High	High	High	High	High	High	High	High		399537		GPX4	2	development;metabolic process;response to stimulus	cytoplasm;mitochondrion	antioxidant activity;catalytic activity	Pf00255	0,45	-1,15	62,1	137,9	4,48
FALSK	High	Master Protein	Q9TVC1	V-type proton ATPase subunit H [OS=Sus scrofa]	FALSK	0	136,469734	54,86542443	20	71	20	1	483	55,814	6,61	High	High	High	High	High	High	High	High	High	High	High	High	High	High	High	High	High	High	High	High		397472		ATP6V1H	4	cellular homeostasis;transport	membrane	catalytic activity;transporter activity	Pf03224, Pf11698	0,45	-1,15	62,1	137,9	8,38
FALSK	High	Master Protein	P09497-1	clathrin light chain B [OS=Homo sapiens]	FALSK	0	28,73989013	37,11790393	9	30	9	1	229	25,175	4,64	High	High	High	High	High	High	High	High	High	High	High	High	High	High	High	High	High	High	High	High		1212	ENSG00000175416.12	CLTB	5	transport	cytoplasm;membrane	protein binding;structural molecule activity	Pf01086	0,45	-1,15	62,1	137,9	11,46
FALSK	High	Master Protein	O75027-2	Isoform 2 of ATP-binding cassette sub-family B member 7, mitochondrial [OS=Homo sapiens]	FALSK	0	16,35838868	7,70252324	5	10	5	1	753	82,717	9,33	High	High	High	High	High	High	High	High	High	High	High	High	High	High	High	High	High	High	High	High		22	ENSG00000131269.15	ABCB7	X	cellular homeostasis;transport	membrane;mitochondrion	catalytic activity;nucleotide binding;transporter activity	Pf00005, Pf00664, Pf13207, Pf13304	0,451	-1,15	62,1	137,9	5,53
FALSK	High	Master Protein	P61421	V-type proton ATPase subunit d 1 [OS=Homo sapiens]	FALSK	0	72,96099536	47,00854701	13	55	13	1	351	40,303	5	High	High	High	High	High	High	High	High	High	High	High	High	High	High	High	High	High	High	High	High		9114	ENSG00000159720.11	ATP6V0D1	16	cell organization and biogenesis;cellular homeostasis;regulation of biological process;response to stimulus;transport	endosome;membrane	catalytic activity;protein binding;transporter activity	Pf01992	0,451	-1,15	62,1	137,9	5,31
FALSK	High	Master Protein	P42704	Leucine-rich PPR motif-containing protein, mitochondrial [OS=Homo sapiens]	FALSK	0	35,01291375	7,962697274	11	28	11	1	1394	157,805	6,13	High	High	High	High	High	High	High	High	High	High	High	High	High	High	High	High	High	High	High	High		10128	ENSG00000138095.18	LRPPRC	2	cellular component movement;metabolic process;regulation of biological process;transport	chromosome;cytoplasm;cytoskeleton;membrane;mitochondrion;nucleus	catalytic activity;DNA binding;protein binding;RNA binding	Pf12854, Pf13041, Pf13812	0,451	-1,15	62,1	137,9	8,58
FALSK	High	Master Protein	Q13449	Limbic system-associated membrane protein [OS=Homo sapiens]	FALSK	0	35,81279205	24,26035503	6	33	6	1	338	37,37	6,98	High	High	High	High	High	High	High	High	High	High	High	High	High	High	High	High	High	High	High	High		4045	ENSG00000185565.11	LSAMP	3	response to stimulus	membrane	protein binding	Pf00047, Pf07679, Pf13895, Pf13927	0,451	-1,15	62,2	137,8	16,21
FALSK	High	Master Protein	P49411	elongation factor Tu, mitochondrial [OS=Homo sapiens]	FALSK	0	52,7481076	28,31858407	12	44	12	1	452	49,51	7,61	High	High	High	High	High	High	High	High	High	High	High	High	High	High	High	High	High	High	High	High		7284		TUFM	16	metabolic process;response to stimulus	membrane;mitochondrion	catalytic activity;nucleotide binding;protein binding;RNA binding	Pf00009, Pf03143, Pf03144	0,452	-1,15	62,2	137,8	11,03
FALSK	High	Master Protein	Q9NSE4	Isoleucine--tRNA ligase, mitochondrial [OS=Homo sapiens]	FALSK	0	29,89663323	8,300395257	7	16	7	1	1012	113,719	7,2	High	High	High	High	High	High	High	High	High	High	High	High	High	High	High	High	High	High	High	High		55699	ENSG00000067704.9	IARS2	1	metabolic process;regulation of biological process	cytoplasm;cytosol;mitochondrion;organelle lumen	catalytic activity;nucleotide binding;RNA binding	Pf00133, Pf06827, Pf08264, Pf09334, Pf13603	0,453	-1,14	62,3	137,7	15,67
FALSK	High	Master Protein	Q86UL8-1	Membrane-associated guanylate kinase, WW and PDZ domain-containing protein 2 [OS=Homo sapiens]	FALSK	0,000112082	6,88881057	1,512027491	2	5	2	1	1455	158,656	6,35	High	High	High	High	High	High	High	High	High	High	High	High	High	High	High	High	High	High	High	High		9863	ENSG00000187391.19	MAGI2	7	cell organization and biogenesis;regulation of biological process;response to stimulus	cytoplasm;endosome;membrane;nucleus	protein binding;signal transducer activity;structural molecule activity	Pf00397, Pf00595, Pf00625, Pf13180	0,454	-1,14	62,4	137,6	14,2
FALSK	High	Master Protein	Q96DA6	mitochondrial import inner membrane translocase subunit TIM14 [OS=Homo sapiens]	FALSK	0	11,18253936	34,48275862	4	5	4	1	116	12,491	10,1	High	High	High	High	High	High	High	High	High	High	High	High	High	High	High	High	High	High	High	High		131118	ENSG00000205981.6	DNAJC19	3	metabolic process;transport	membrane;mitochondrion	protein binding	Pf00226	0,455	-1,14	62,5	137,5	7,91
FALSK	High	Master Protein	P31930	Cytochrome b-c1 complex subunit 1, mitochondrial [OS=Homo sapiens]	FALSK	0	24,23533207	12,91666667	6	23	6	1	480	52,612	6,37	High	High	High	High	High	High	High	High	High	High	High	High	High	High	High	High	High	High	High	High		7384	ENSG00000010256.10	UQCRC1	3	metabolic process;response to stimulus;transport	membrane;mitochondrion	catalytic activity;metal ion binding;protein binding;transporter activity	Pf00675, Pf05193, Pf08367	0,455	-1,14	62,6	137,4	17,19
FALSK	High	Master Protein	P23468-1	Receptor-type tyrosine-protein phosphatase delta [OS=Homo sapiens]	FALSK	0	62,03089866	12,70920502	17	22	12	1	1912	214,625	6,57	High	High	High	High	High	High	High	High	High	High	High	High	High	High	High	High	High	High	High	High		5789	ENSG00000282932.2; ENSG00000153707.16	PTPRD	9; CHR_HSCHR9_1_CTG6	cell communication;cell differentiation;cell organization and biogenesis;metabolic process;regulation of biological process;response to stimulus	membrane	catalytic activity;protein binding;receptor activity;signal transducer activity	Pf00041, Pf00047, Pf00102, Pf07679, Pf13895, Pf13927, Pf14566	0,455	-1,14	62,6	137,4	12,73
FALSK	High	Master Protein	Q99757	Thioredoxin, mitochondrial [OS=Homo sapiens]	FALSK	0	14,7507354	21,68674699	3	12	3	1	166	18,372	8,29	High	High	High	High	High	High	High	High	High	High	High	High	High	High	High	High	High	High	High	High		25828	ENSG00000100348.9	TXN2	22	cell communication;cellular homeostasis;metabolic process;regulation of biological process;response to stimulus;transport	mitochondrion;organelle lumen	catalytic activity;protein binding	Pf00085, Pf13098, Pf13899, Pf13905	0,458	-1,13	62,9	137,1	15,14
FALSK	High	Master Protein	Q5D144	Transcription factor A, mitochondrial [OS=Sus scrofa]	FALSK	0	36,34925988	35,77235772	11	35	11	1	246	28,708	9,6	High	High	High	High	High	High	High	High	High	High	High	High	High	High	High	High	High	High	High	High		397279		TFAM	14	cell organization and biogenesis;metabolic process;regulation of biological process	mitochondrion	DNA binding	Pf00505, Pf09011	0,459	-1,12	62,9	137,1	8,46
FALSK	High	Master Protein	P38646	Stress-70 protein, mitochondrial [OS=Homo sapiens]	FALSK	0	155,2115407	43,00441826	27	135	26	1	679	73,635	6,16	High	High	High	High	High	High	High	High	High	High	High	High	High	High	High	High	High	High	High	High		3313	ENSG00000113013.12	HSPA9	5	cell differentiation;cell organization and biogenesis;metabolic process;regulation of biological process;response to stimulus;transport	cytoplasm;mitochondrion;nucleus	nucleotide binding;protein binding;RNA binding	Pf00012, Pf06723	0,459	-1,12	62,9	137,1	11,74
FALSK	High	Master Protein	Q86TV6-2	Isoform 2 of Tetratricopeptide repeat protein 7B [OS=Homo sapiens]	FALSK	0	15,10382596	6,627906977	5	7	5	1	860	95,987	6,83	High	High	High	High	High	High	High	High	High	High	High	High	High	High	High	High	High	High	High	High								protein binding	Pf07719, Pf13414, Pf13424, Pf13432, Pf14559	0,46	-1,12	63	137	14,17
FALSK	High	Master Protein	Q9UJQ1-1	Lysosome-associated membrane glycoprotein 5 [OS=Homo sapiens]	FALSK	0	13,33158122	13,92857143	3	6	3	1	280	31,452	6,46	High	High	High	High	High	High	High	High	High	High	High	High	High	High	High	High	High	High	High	High		24141	ENSG00000125869.9	LAMP5	20		endosome;membrane		Pf01299	0,461	-1,12	63,1	136,9	17,15
FALSK	High	Master Protein	Q9UJV8	Purine-rich element-binding protein gamma [OS=Homo sapiens]	FALSK	0	9,518209916	9,510086455	3	5	3	1	347	39,531	9,55	High	High	High	High	High	High	High	High	High	High	High	High	High	High	High	High	High	High	High	High		29942	ENSG00000172733.11	PURG	8		nucleus	DNA binding;RNA binding	Pf04845	0,461	-1,12	63,1	136,9	8,7
FALSK	High	Master Protein	Q9HCJ6	Synaptic vesicle membrane protein VAT-1 homolog-like [OS=Homo sapiens]	FALSK	0	70,17463686	40,81145585	14	54	14	1	419	45,87	5,06	High	High	High	High	High	High	High	High	High	High	High	High	High	High	High	High	High	High	High	High		57687	ENSG00000171724.2	VAT1L	16	metabolic process		catalytic activity;metal ion binding;protein binding	Pf00107, Pf08240, Pf13602	0,461	-1,12	63,1	136,9	13,33
FALSK	High	Master Protein	Q9Y5K8	V-type proton ATPase subunit D [OS=Homo sapiens]	FALSK	0	39,61125732	43,72469636	8	25	8	1	247	28,245	9,36	High	High	High	High	High	High	High	High	High	High	High	High	High	High	High	High	High	High	High	High		51382	ENSG00000100554.11	ATP6V1D	14	cell organization and biogenesis;cellular homeostasis;regulation of biological process;response to stimulus;transport	cytosol;membrane	catalytic activity;protein binding;transporter activity	Pf01813	0,462	-1,11	63,2	136,8	8,31
FALSK	High	Master Protein	Q9H902-3	Isoform 3 of Receptor expression-enhancing protein 1 [OS=Homo sapiens]	FALSK	0	9,128032526	12,98076923	2	2	2	1	208	22,944	9,48	Not Found	Not Found	Not Found	Not Found	Not Found	High	High	High	High	High	Not Found	Not Found	Not Found	Not Found	Not Found	High	High	High	High	High		65055	ENSG00000068615.17	REEP1	2	cell organization and biogenesis;regulation of biological process	cytoplasm;endoplasmic reticulum;membrane	protein binding	Pf03134	0,462	-1,11	63,2	136,8	13,28
FALSK	High	Master Protein	P31641	Sodium- and chloride-dependent taurine transporter [OS=Homo sapiens]	FALSK	0,000482114	4,559607343	3,064516129	2	3	2	1	620	69,784	7,39	High	High	High	High	High	High	High	High	High	High	High	High	High	High	High	High	High	High	High	High		6533	ENSG00000131389.16	SLC6A6	3	metabolic process;transport	membrane	transporter activity	Pf00209	0,462	-1,11	63,2	136,8	19,42
FALSK	High	Master Protein	Q2L969	Metaxin-2 [OS=Sus scrofa]	FALSK	0	31,50276411	33,33333333	7	16	7	1	267	30,087	6	High	High	High	High	High	High	High	High	High	High	High	High	High	High	High	High	High	High	High	High		733591	ENSSSCG00000022222.1	MTX2	15	transport	membrane;mitochondrion		Pf11801, Pf13410, Pf14497	0,464	-1,11	63,3	136,7	8,03
FALSK	High	Master Protein	Q9UPP2	IQ motif and SEC7 domain-containing protein 3 [OS=Homo sapiens]	FALSK	0	14,66295602	5,752961083	5	13	5	1	1182	127,541	6,51	High	High	High	High	High	High	High	High	High	High	High	High	High	High	High	High	High	High	High	High		440073	ENSG00000120645.11	IQSEC3	12	cell organization and biogenesis;regulation of biological process	cytoplasm	protein binding	Pf00169, Pf01369	0,464	-1,11	63,4	136,6	15,65
FALSK	High	Master Protein	P09493-5	Isoform 5 of Tropomyosin alpha-1 chain [OS=Homo sapiens]	FALSK	0	47,76371065	38,36734694	10	48	3	1	245	28,368	4,77	High	High	High	High	High	High	High	High	High	High	High	High	High	High	High	High	High	High	High	High		7168	ENSG00000140416.19	TPM1	15	cell organization and biogenesis;cellular component movement;regulation of biological process;response to stimulus	cytoskeleton;cytosol	protein binding;structural molecule activity	Pf00261, Pf12718	0,464	-1,11	63,4	136,6	5,73
FALSK	High	Master Protein	O60220	Mitochondrial import inner membrane translocase subunit Tim8 A [OS=Homo sapiens]	FALSK	0	16,08862502	46,39175258	4	11	4	1	97	10,991	5,16	High	High	High	High	High	High	High	High	High	High	High	High	High	High	High	High	High	High	High	High		1678	ENSG00000126953.5	TIMM8A	X	transport	membrane;mitochondrion	metal ion binding;protein binding	Pf02953	0,464	-1,11	63,4	136,6	11,91
FALSK	High	Master Protein	Q8WXD9	Caskin-1 [OS=Homo sapiens]	FALSK	0	33,2603789	9,783368274	9	15	9	1	1431	149,722	9,14	High	High	High	High	High	High	High	High	High	High	High	High	High	High	High	High	High	High	High	High		57524	ENSG00000167971.15	CASKIN1	16	regulation of biological process;response to stimulus	cytoplasm	protein binding	Pf00018, Pf00023, Pf00536, Pf07647, Pf07653, Pf12796, Pf13606, Pf13637, Pf13857, Pf14604	0,465	-1,11	63,5	136,5	14,94
FALSK	High	Master Protein	P13804-1	Electron transfer flavoprotein subunit alpha, mitochondrial [OS=Homo sapiens]	FALSK	0	71,49945695	42,64264264	11	39	11	1	333	35,058	8,38	High	High	High	High	High	High	High	High	High	High	High	High	High	High	High	High	High	High	High	High		2108	ENSG00000140374.15	ETFA	15	metabolic process;transport	mitochondrion;organelle lumen	catalytic activity;nucleotide binding;protein binding	Pf00766, Pf01012	0,465	-1,1	63,5	136,5	7,23
FALSK	High	Master Protein	Q9Y697	Cysteine desulfurase, mitochondrial [OS=Homo sapiens]	FALSK	0	11,64183792	7,439824945	3	3	3	1	457	50,164	8,31	High	High	High	High	High	High	High	High	High	High	High	High	High	High	High	High	High	High	High	High		9054	ENSG00000244005.12	NFS1	20	cell organization and biogenesis;metabolic process	cytoplasm;cytosol;mitochondrion;nucleus;organelle lumen	catalytic activity;metal ion binding;protein binding	Pf00266, Pf01212	0,465	-1,1	63,5	136,5	12,9
FALSK	High	Master Protein	Q16798	NADP-dependent malic enzyme, mitochondrial [OS=Homo sapiens]	FALSK	0	51,35708045	30,29801325	11	17	11	1	604	67,026	7,97	High	High	High	High	High	High	High	High	High	High	High	High	High	High	High	High	High	High	High	High		10873	ENSG00000151376.16	ME3	11	metabolic process	mitochondrion;organelle lumen	catalytic activity;metal ion binding;nucleotide binding	Pf00390, Pf03949	0,466	-1,1	63,6	136,4	7,7
FALSK	High	Master Protein	P52815	39S ribosomal protein L12, mitochondrial [OS=Homo sapiens]	FALSK	0	7,973584824	11,61616162	2	8	2	1	198	21,335	8,87	High	High	High	High	High	High	High	High	High	High	High	High	High	High	High	High	High	High	High	High		6182	ENSG00000262814.7	MRPL12	17	cell organization and biogenesis;metabolic process;regulation of biological process	membrane;mitochondrion;ribosome	protein binding;RNA binding;structural molecule activity	Pf00542	0,466	-1,1	63,6	136,4	9,87
FALSK	High	Master Protein	O75051-1	Plexin-A2 [OS=Homo sapiens]	FALSK	0	16,35901561	3,695881732	7	9	2	1	1894	210,969	6,48	High	High	High	High	High	Not Found	Not Found	Not Found	Not Found	Not Found	High	High	High	High	High	Not Found	Not Found	Not Found	Not Found	Not Found		5362	ENSG00000076356.6	PLXNA2	1	cellular component movement;regulation of biological process;response to stimulus	membrane	protein binding;receptor activity;signal transducer activity	Pf01403, Pf01437, Pf01833, Pf08337	0,466	-1,1	63,6	136,4	9,88
FALSK	High	Master Protein	Q8IYB8	ATP-dependent RNA helicase SUPV3L1, mitochondrial [OS=Homo sapiens]	FALSK	0	15,10059471	7,633587786	5	10	5	1	786	87,935	7,99	High	High	High	High	High	High	High	High	High	High	High	High	High	High	High	High	High	High	High	High		6832	ENSG00000156502.13	SUPV3L1	10	cell organization and biogenesis;metabolic process;regulation of biological process	mitochondrion;nucleus;organelle lumen	catalytic activity;DNA binding;nucleotide binding;protein binding;RNA binding	Pf00271, Pf12513	0,466	-1,1	63,6	136,4	14,86
FALSK	High	Master Protein	P08247	Synaptophysin [OS=Homo sapiens]	FALSK	0	12,16416104	22,04472843	4	12	4	1	313	33,823	4,81	High	High	High	High	High	High	High	High	High	High	High	High	High	High	High	High	High	High	High	High		6855	ENSG00000102003.10	SYP	X	cell organization and biogenesis;regulation of biological process;response to stimulus;transport	membrane	protein binding;transporter activity	Pf01284	0,466	-1,1	63,6	136,4	15,83
FALSK	High	Master Protein	P20839-6	Isoform 6 of Inosine-5'-monophosphate dehydrogenase 1 [OS=Homo sapiens]	FALSK	0	106,8132281	45,74290484	18	101	16	1	599	64,279	7,02	High	High	High	High	High	High	High	High	High	High	High	High	High	High	High	High	High	High	High	High		3614	ENSG00000106348.16	IMPDH1	7	cell proliferation;metabolic process;response to stimulus	cytoplasm;cytosol;nucleus	catalytic activity;DNA binding;metal ion binding;nucleotide binding;RNA binding	Pf00478, Pf00571, Pf00977, Pf01070, Pf03060, Pf05690	0,466	-1,1	63,6	136,4	9,53
FALSK	High	Master Protein	P53985	Monocarboxylate transporter 1 [OS=Homo sapiens]	FALSK	0,000112082	7,17275095	6,4	2	3	2	1	500	53,909	8,66	High	High	High	High	High	High	High	High	High	High	High	High	High	High	High	High	High	High	High	High		6566	ENSG00000281917.2; ENSG00000155380.11	SLC16A1	1; CHR_HG2104_PATCH	cell organization and biogenesis;cellular component movement;metabolic process;regulation of biological process;response to stimulus;transport	membrane;mitochondrion	protein binding;transporter activity	Pf00083, Pf07690, Pf12832	0,467	-1,1	63,6	136,4	7,88
FALSK	High	Master Protein	Q9NRW1	Ras-related protein Rab-6B [OS=Homo sapiens]	FALSK	0	29,28072034	38,46153846	6	41	3	1	208	23,447	5,53	High	High	High	High	High	High	High	High	High	High	High	High	High	High	High	High	High	High	High	High		51560	ENSG00000154917.10	RAB6B	3	regulation of biological process;response to stimulus;transport	cytosol;Golgi;membrane	catalytic activity;nucleotide binding;protein binding	Pf00025, Pf00071, Pf02421, Pf04670, Pf08477	0,467	-1,1	63,7	136,3	27,29
FALSK	High	Master Protein	O14561	Acyl carrier protein, mitochondrial [OS=Homo sapiens]	FALSK	0	18,27083448	15,38461538	3	8	3	1	156	17,406	4,93	High	High	High	High	High	High	High	High	High	High	High	High	High	High	High	High	High	High	High	High		4706	ENSG00000004779.9	NDUFAB1	16	cell organization and biogenesis;metabolic process;transport	membrane;mitochondrion;organelle lumen	catalytic activity;metal ion binding;protein binding	Pf00550	0,467	-1,1	63,7	136,3	16,45
FALSK	High	Master Protein	P04179	Superoxide dismutase [Mn], mitochondrial [OS=Homo sapiens]	FALSK	0	16,80647911	10,36036036	3	17	1	1	222	24,707	8,25	High	High	High	High	High	High	High	High	High	High	High	High	High	High	High	High	High	High	High	High		6648		SOD2	6	cell organization and biogenesis;metabolic process;regulation of biological process;response to stimulus	mitochondrion;organelle lumen	antioxidant activity;catalytic activity;metal ion binding;protein binding	Pf00081, Pf02777	0,467	-1,1	63,7	136,3	16,8
FALSK	High	Master Protein	Q9UPQ3-1	Arf-GAP with GTPase, ANK repeat and PH domain-containing protein 1 [OS=Homo sapiens]	FALSK	0	17,73806894	6,184364061	4	5	3	1	857	94,411	7,94	High	High	High	High	High	High	High	High	High	High	High	High	High	High	High	High	High	High	High	High		116987	ENSG00000157985.18	AGAP1	2	regulation of biological process;response to stimulus;transport	cytoplasm	enzyme regulator activity;metal ion binding;nucleotide binding;protein binding	Pf00023, Pf00071, Pf00169, Pf01412, Pf08477, Pf12796, Pf13606, Pf13637, Pf13857	0,467	-1,1	63,7	136,3	22,63
FALSK	High	Master Protein	P54284	Voltage-dependent L-type calcium channel subunit beta-3 [OS=Homo sapiens]	FALSK	0	13,78261736	10,74380165	4	5	2	1	484	54,498	6,35	High	High	High	High	High	High	High	High	High	High	High	High	High	High	High	High	High	High	High	High		784	ENSG00000167535.7	CACNB3	12	cell communication;cell organization and biogenesis;cellular homeostasis;regulation of biological process;response to stimulus;transport	cytosol;membrane	protein binding;transporter activity	Pf00625, Pf12052	0,468	-1,1	63,7	136,3	21,93
FALSK	High	Master Protein	Q02218	2-oxoglutarate dehydrogenase, mitochondrial [OS=Homo sapiens]	FALSK	0	155,8092841	32,25806452	28	90	22	1	1023	115,861	6,86	High	High	High	High	High	High	High	High	High	High	High	High	High	High	High	High	High	High	High	High		4967	ENSG00000105953.14	OGDH	7	cellular component movement;metabolic process	cytosol;membrane;mitochondrion;organelle lumen	catalytic activity;metal ion binding;protein binding	Pf00676, Pf02779	0,468	-1,1	63,7	136,3	6,73
FALSK	High	Master Protein	F1SPM8	AP2-associated protein kinase 1 [OS=Sus scrofa]	FALSK	0	179,3084096	49,79338843	29	81	28	1	968	104,245	6,9	High	High	High	High	High	High	High	High	High	High	High	High	High	High	High	High	High	High	High	High		100512341		AAK1	3	metabolic process;regulation of biological process;transport	membrane	catalytic activity;nucleotide binding;protein binding	Pf00069, Pf07714	0,469	-1,09	63,8	136,2	10,56
FALSK	High	Master Protein	Q06AT1	Neuron-specific calcium-binding protein hippocalcin [OS=Sus scrofa]	FALSK	0	43,19088248	51,8134715	11	38	4	1	193	22,413	4,97	High	High	High	High	High	High	High	High	High	High	High	High	High	High	High	High	High	High	High	High		100144505	ENSSSCG00000003663.2	HPCA	6			metal ion binding;protein binding	Pf00036, Pf13202, Pf13405, Pf13499, Pf13833	0,469	-1,09	63,8	136,2	12,95
FALSK	High	Master Protein	P15531-2	Isoform 2 of Nucleoside diphosphate kinase A [OS=Homo sapiens]	FALSK	0	33,81678098	39,5480226	6	66	3	1	177	19,641	5,58	High	High	High	High	High	High	High	High	High	High	High	High	High	High	High	High	High	High	High	High		4830	ENSG00000239672.7	NME1	17	cellular homeostasis;metabolic process;regulation of biological process;response to stimulus;transport	cytoplasm;cytosol;membrane;nucleus	catalytic activity;DNA binding;metal ion binding;nucleotide binding;protein binding;RNA binding	Pf00334	0,469	-1,09	63,8	136,2	9,1
FALSK	High	Master Protein	Q13367	AP-3 complex subunit beta-2 [OS=Homo sapiens]	FALSK	0	88,88971892	25,69316081	22	55	19	1	1082	118,985	5,59	High	High	High	High	High	High	High	High	High	High	High	High	High	High	High	High	High	High	High	High		8120	ENSG00000103723.12	AP3B2	15	cellular component movement;transport	cytoplasm;Golgi;membrane	transporter activity	Pf01602, Pf12717, Pf13646, Pf14796	0,469	-1,09	63,9	136,1	9,2
FALSK	High	Master Protein	Q9NVP4-1	Double zinc ribbon and ankyrin repeat-containing protein 1 [OS=Homo sapiens]	FALSK	0,000396275	6,313172898	4,122340426	2	3	2	1	752	82,139	8,06	High	High	High	High	High	High	High	High	High	High	High	High	High	High	High	High	High	High	High	High		55184	ENSG00000089091.16	DZANK1	20			metal ion binding	Pf03174, Pf12773, Pf12796, Pf13248, Pf13287, Pf13290, Pf13637	0,469	-1,09	63,9	136,1	19,9
FALSK	High	Master Protein	Q86U28	iron-sulfur cluster assembly 2 homolog, mitochondrial [OS=Homo sapiens]	FALSK	0	9,74541223	23,37662338	3	8	3	1	154	16,466	5,25	High	High	High	High	High	High	High	High	High	High	High	High	High	High	High	High	High	High	High	High		122961	ENSG00000165898.13	ISCA2	14	cell organization and biogenesis;metabolic process	mitochondrion;organelle lumen	metal ion binding;protein binding;structural molecule activity	Pf01521	0,47	-1,09	64	136	21,45
FALSK	High	Master Protein	P26992	Ciliary neurotrophic factor receptor subunit alpha [OS=Homo sapiens]	FALSK	0	8,023973042	8,064516129	2	7	2	1	372	40,607	6,76	High	High	High	High	High	High	High	High	High	High	High	High	High	High	High	High	High	High	High	High		1271	ENSG00000122756.14	CNTFR	9	regulation of biological process;response to stimulus	membrane	protein binding;receptor activity;signal transducer activity	Pf00041, Pf00047	0,47	-1,09	64	136	27,92
FALSK	High	Master Protein	P35080-1	Profilin-2 [OS=Homo sapiens]	FALSK	0	18,82935249	36,42857143	4	43	1	1	140	15,036	6,99	High	High	High	High	High	High	High	High	High	High	High	High	High	High	High	High	High	High	High	High		5217	ENSG00000070087.13	PFN2	3	cell organization and biogenesis;regulation of biological process	cytoplasm;cytoskeleton	enzyme regulator activity;nucleotide binding;protein binding	Pf00235	0,471	-1,09	64,1	135,9	10,44
FALSK	High	Master Protein	Q9Y6N5	Sulfide:quinone oxidoreductase, mitochondrial [OS=Homo sapiens]	FALSK	0	66,95473707	28,44444444	9	37	9	1	450	49,929	9,11	High	High	High	High	High	High	High	High	High	High	High	High	High	High	High	High	High	High	High	High		58472	ENSG00000137767.13	SQRDL	15	metabolic process	membrane;mitochondrion	catalytic activity	Pf07992, Pf13738	0,471	-1,09	64,1	135,9	9,63
FALSK	High	Master Protein	O60551	Glycylpeptide N-tetradecanoyltransferase 2 [OS=Homo sapiens]	FALSK	0	18,14800225	8,835341365	3	6	1	1	498	56,944	7,58	High	High	High	High	High	Not Found	Not Found	Not Found	Not Found	Not Found	High	High	High	High	High	Not Found	Not Found	Not Found	Not Found	Not Found		9397	ENSG00000152465.17	NMT2	10	metabolic process;regulation of biological process;transport	cytoplasm;cytosol;Golgi;membrane	catalytic activity	Pf01233, Pf02799	0,471	-1,09	64,1	135,9	19,37
FALSK	High	Master Protein	P06348	Histone H1t [OS=Sus scrofa]	FALSK	0	16,81984668	19,90521327	3	35	1	1	211	22,046	11,58	Not Found	Not Found	Not Found	Not Found	Not Found	High	High	High	High	High	Not Found	Not Found	Not Found	Not Found	Not Found	High	High	High	High	High	Acetyl [N-Term]					cell differentiation;cell organization and biogenesis;development	chromosome;nucleus	DNA binding	Pf00538	0,472	-1,08	64,1	135,9	47,46
FALSK	High	Master Protein	Q9NZR1	Tropomodulin-2 [OS=Homo sapiens]	FALSK	0	35,29915311	29,34472934	9	21	8	1	351	39,571	5,27	High	High	High	High	High	High	High	High	High	High	High	High	High	High	High	High	High	High	High	High		29767	ENSG00000128872.9	TMOD2	15	cell communication;cell organization and biogenesis;regulation of biological process;response to stimulus	cytoplasm;cytoskeleton	protein binding	Pf03250	0,472	-1,08	64,1	135,9	10,83
FALSK	High	Master Protein	O43186	cone-rod homeobox protein [OS=Homo sapiens]	FALSK	0,000112082	7,44821236	7,023411371	2	6	2	1	299	32,241	9,16	High	High	High	High	High	High	High	High	High	High	High	High	High	High	High	High	High	High	High	High		1406	ENSG00000105392.15	CRX	19	cell differentiation;development;metabolic process;regulation of biological process;response to stimulus	nucleus	DNA binding;protein binding	Pf00046	0,472	-1,08	64,1	135,9	10,12
FALSK	High	Master Protein	Q9HD33-1	39S ribosomal protein L47, mitochondrial [OS=Homo sapiens]	FALSK	0	14,6906651	12,4	3	4	3	1	250	29,432	10,37	High	High	High	High	High	High	High	High	High	High	High	High	High	High	High	High	High	High	High	High		57129	ENSG00000136522.13	MRPL47	3	cell organization and biogenesis;metabolic process	membrane;mitochondrion;ribosome	structural molecule activity	Pf06984	0,473	-1,08	64,2	135,8	23,38
FALSK	High	Master Protein	Q12765-2	Isoform 2 of Secernin-1 [OS=Homo sapiens]	FALSK	0	13,21999522	8,986175115	4	10	4	1	434	48,683	4,78	High	High	High	High	High	High	High	High	High	High	High	High	High	High	High	High	High	High	High	High		9805	ENSG00000136193.16	SCRN1	7	metabolic process;transport	cytoplasm;membrane;nucleus	catalytic activity;protein binding	Pf03577	0,473	-1,08	64,2	135,8	23,85
FALSK	High	Master Protein	Q9Y6X4-1	Soluble lamin-associated protein of 75 kDa [OS=Homo sapiens]	FALSK	0	38,43250667	12,8358209	5	35	5	1	670	74,908	4,6	High	High	High	High	High	High	High	High	High	High	High	High	High	High	High	High	High	High	High	High		26049	ENSG00000198780.11	FAM169A	5		membrane;nucleus			0,473	-1,08	64,3	135,7	14,47
FALSK	High	Master Protein	Q92522	Histone H1x [OS=Homo sapiens]	FALSK	0	19,92544378	19,71830986	5	31	5	1	213	22,474	10,76	High	High	High	High	High	High	High	High	High	High	High	High	High	High	High	High	High	High	High	High		8971	ENSG00000184897.5	H1FX	3	cell organization and biogenesis	chromosome;nucleus	DNA binding;protein binding;RNA binding	Pf00538	0,474	-1,08	64,3	135,7	16,2
FALSK	High	Master Protein	P14324	Farnesyl pyrophosphate synthase [OS=Homo sapiens]	FALSK	0,000396275	5,986392354	4,77326969	2	6	2	1	419	48,245	6,15	High	High	High	High	High	High	High	High	High	High	High	High	High	High	High	High	High	High	High	High		2224	ENSG00000160752.14	FDPS	1	metabolic process	cytoplasm;cytosol	catalytic activity;metal ion binding;RNA binding	Pf00348	0,476	-1,07	64,5	135,5	25,88
FALSK	High	Master Protein	Q9NQ66-1	1-phosphatidylinositol 4,5-bisphosphate phosphodiesterase beta-1 [OS=Homo sapiens]	FALSK	0	51,5397234	13,98026316	13	21	13	1	1216	138,48	6,23	High	High	High	High	High	High	High	High	High	High	High	High	High	High	High	High	High	High	High	High		23236	ENSG00000182621.17	PLCB1	20	cell differentiation;metabolic process;regulation of biological process;response to stimulus	cytoplasm;cytosol;membrane;nucleus	catalytic activity;enzyme regulator activity;metal ion binding;protein binding;signal transducer activity	Pf00168, Pf00387, Pf00388, Pf08703, Pf09279	0,478	-1,06	64,7	135,3	14,54
FALSK	High	Master Protein	P80723	Brain acid soluble protein 1 [OS=Homo sapiens]	FALSK	0	26,33542608	15,4185022	3	19	3	1	227	22,68	4,63	High	High	High	High	High	High	High	High	High	High	High	High	High	High	High	High	High	High	High	High		10409	ENSG00000176788.8	BASP1	5	cell differentiation;cell organization and biogenesis;regulation of biological process	cytoplasm;cytoskeleton;membrane;nucleus	DNA binding;protein binding		0,479	-1,06	64,8	135,2	15,56
FALSK	High	Master Protein	Q95339	ATP synthase subunit f, mitochondrial [OS=Sus scrofa]	FALSK	0	9,37593459	27,27272727	2	9	2	1	88	10,304	9,95	High	High	High	High	High	High	High	High	High	High	High	High	High	High	High	High	High	High	High	High		100037979		ATP5J2	3	metabolic process;transport	membrane;mitochondrion		Pf10206	0,479	-1,06	64,8	135,2	15,89
FALSK	High	Master Protein	O79881	NADH-ubiquinone oxidoreductase chain 4 [OS=Sus scrofa]	FALSK	0	13,8315895	7,843137255	2	4	2	1	459	51,79	9,54	High	High	High	High	High	High	High	High	High	High	High	High	High	High	High	High	High	High	High	High		808510	ENSSSCG00000018087.3	ND4	MT	metabolic process;transport	membrane;mitochondrion	catalytic activity	Pf00361, Pf01059	0,48	-1,06	64,8	135,2	22,12
FALSK	High	Master Protein	Q2HYU2	ATP-dependent 6-phosphofructokinase, muscle type [OS=Sus scrofa]	FALSK	0	205,7855284	47,43589744	26	181	8	1	780	85,273	8,18	High	High	High	High	High	High	High	High	High	High	High	High	High	High	High	High	High	High	High	High		733601		PFKM	5	metabolic process	cytoplasm	catalytic activity;metal ion binding;nucleotide binding	Pf00365	0,48	-1,06	64,8	135,2	3,92
FALSK	High	Master Protein	P15259	phosphoglycerate mutase 2 [OS=Homo sapiens]	FALSK	0	35,06509268	24,11067194	5	31	1	1	253	28,748	8,88	High	High	High	High	High	High	High	High	High	High	High	High	High	High	High	High	High	High	High	High		5224	ENSG00000164708.5	PGAM2	7	metabolic process;regulation of biological process;response to stimulus	cytosol;nucleus	catalytic activity	Pf00300	0,481	-1,06	65	135	8,55
FALSK	High	Master Protein	Q0QF01	Succinate dehydrogenase [ubiquinone] flavoprotein subunit, mitochondrial [OS=Sus scrofa]	FALSK	0	117,3270738	48,79518072	20	90	20	1	664	72,785	7,5	High	High	High	High	High	High	High	High	High	High	High	High	High	High	High	High	High	High	High	High		780433		SDHA; LOC780433		metabolic process;transport	membrane;mitochondrion	catalytic activity;nucleotide binding;protein binding	Pf00890, Pf01946, Pf02910	0,481	-1,05	65	135	5,13
FALSK	High	Master Protein	O00499	Myc box-dependent-interacting protein 1 [OS=Homo sapiens]	FALSK	0	70,3926182	32,8836425	14	49	3	1	593	64,659	5,06	High	High	High	High	High	High	High	High	High	High	High	High	High	High	High	High	High	High	High	High		274	ENSG00000136717.14	BIN1	2	cell differentiation;cell organization and biogenesis;cell proliferation;development;regulation of biological process;transport	cytoplasm;cytoskeleton;membrane;nucleus	protein binding	Pf00018, Pf03114, Pf07653, Pf14604	0,482	-1,05	65,1	134,9	15,07
FALSK	High	Master Protein	O77735	Secretory carrier-associated membrane protein 1 [OS=Sus scrofa]	FALSK	0	38,547524	26,33136095	5	27	5	1	338	37,895	7,42	High	High	High	High	High	High	High	High	High	High	High	High	High	High	High	High	High	High	High	High		397477; 106507159		SCAMP1; LOC106507159	2	transport	endosome;Golgi;membrane		Pf04144	0,483	-1,05	65,2	134,8	13,86
FALSK	High	Master Protein	P11708	Malate dehydrogenase, cytoplasmic [OS=Sus scrofa]	FALSK	0	111,257675	74,25149701	17	172	17	1	334	36,431	6,58	High	High	High	High	High	High	High	High	High	High	High	High	High	High	High	High	High	High	High	High		396894; 102163346		MDH1; LOC102163346	3	metabolic process	cytoplasm;cytosol;mitochondrion	catalytic activity	Pf00056, Pf02866	0,484	-1,05	65,2	134,8	8,25
FALSK	High	Master Protein	O75038	1-phosphatidylinositol 4,5-bisphosphate phosphodiesterase eta-2 [OS=Homo sapiens]	FALSK	0	8,588251539	2,61299435	3	5	2	1	1416	154,572	7,84	High	High	High	High	High	Not Found	High	High	High	High	High	High	High	High	High	High	High	High	High	High		9651	ENSG00000149527.17; ENSG00000276429.3	PLCH2	1; CHR_HSCHR1_1_CTG3	metabolic process;regulation of biological process;response to stimulus	cytoplasm;membrane	catalytic activity;metal ion binding;protein binding;signal transducer activity	Pf00036, Pf00168, Pf00169, Pf00387, Pf00388, Pf09279, Pf13499, Pf14788	0,485	-1,04	65,3	134,7	13,69
FALSK	High	Master Protein	A9CQL8	Prostamide/prostaglandin F synthase [OS=Sus scrofa]	FALSK	0	20,69932447	27,72277228	4	12	4	1	202	21,533	6,87	High	High	High	High	High	High	High	High	High	High	High	High	High	High	High	High	High	High	High	High		100134955		FAM213B	6	metabolic process	cytoplasm;cytosol;endoplasmic reticulum	antioxidant activity;catalytic activity;nucleotide binding	Pf00152, Pf13911	0,486	-1,04	65,4	134,6	12,16
FALSK	High	Master Protein	P57721-1	Poly(rC)-binding protein 3 [OS=Homo sapiens]	FALSK	0	77,77768571	41,50943396	11	54	6	1	371	39,44	8,07	High	High	High	High	High	High	High	High	High	High	High	High	High	High	High	High	High	High	High	High		54039	ENSG00000183570.16	PCBP3	21	metabolic process;regulation of biological process	cytoplasm;cytosol;nucleus	DNA binding;RNA binding	Pf00013, Pf13014	0,486	-1,04	65,4	134,6	11,53
FALSK	High	Master Protein	P06899	Histone H2B type 1-J [OS=Homo sapiens]	FALSK	0	67,32958031	46,82539683	6	183	1	1	126	13,896	10,32	High	High	High	High	High	High	High	High	High	High	High	High	High	High	High	High	High	High	High	High		8970	ENSG00000124635.8	HIST1H2BJ	6	cell organization and biogenesis;defense response;response to stimulus	chromosome;cytoplasm;nucleus	DNA binding;protein binding	Pf00125, Pf00808	0,486	-1,04	65,4	134,6	40,77
FALSK	High	Master Protein	P21283	V-type proton ATPase subunit C 1 [OS=Homo sapiens]	FALSK	0	65,33425938	40,31413613	14	50	14	1	382	43,914	7,46	High	High	High	High	High	High	High	High	High	High	High	High	High	High	High	High	High	High	High	High		528	ENSG00000155097.11	ATP6V1C1	8	cellular homeostasis;regulation of biological process;response to stimulus;transport	cytoplasm;cytosol;membrane	catalytic activity;protein binding;transporter activity	Pf03223	0,488	-1,04	65,5	134,5	7,99
FALSK	High	Master Protein	P36543	V-type proton ATPase subunit E 1 [OS=Homo sapiens]	FALSK	0	58,17089598	49,11504425	11	95	11	1	226	26,129	8	High	High	High	High	High	High	High	High	High	High	High	High	High	High	High	High	High	High	High	High		529	ENSG00000131100.12	ATP6V1E1	22	cellular homeostasis;regulation of biological process;response to stimulus;transport	cytoplasm;cytosol;endosome;membrane;mitochondrion	catalytic activity;protein binding;transporter activity	Pf01991	0,488	-1,04	65,6	134,4	6,36
FALSK	High	Master Protein	A8MT19	Putative rhophilin-2-like protein RHPN2P1 [OS=Homo sapiens]	FALSK	0	16,55397336	8,919382504	4	9	1	1	583	65,903	6,98	High	High	High	High	High	High	High	High	High	High	High	High	High	High	High	High	High	High	High	High		646090		RHPN2P1	15			protein binding	Pf03097	0,488	-1,03	65,6	134,4	14,25
FALSK	High	Master Protein	O14874	[3-methyl-2-oxobutanoate dehydrogenase [lipoamide]] kinase, mitochondrial [OS=Homo sapiens]	FALSK	0	16,50266095	9,223300971	2	6	2	1	412	46,331	8,82	High	High	High	High	High	High	High	High	High	High	High	High	High	High	High	High	High	High	High	High		10295	ENSG00000103507.13	BCKDK	16	metabolic process	mitochondrion;organelle lumen	catalytic activity;nucleotide binding;protein binding	Pf02518, Pf10436	0,488	-1,03	65,6	134,4	12,7
FALSK	High	Master Protein	Q12959-2	Isoform 2 of Disks large homolog 1 [OS=Homo sapiens]	FALSK	0	52,13493722	15,33477322	11	32	6	1	926	103,258	5,92	High	High	High	High	High	High	High	High	High	High	High	High	High	High	High	High	High	High	High	High		1739	ENSG00000075711.20	DLG1	3	cell communication;cell organization and biogenesis;cell proliferation;metabolic process;regulation of biological process;response to stimulus;transport	cytoplasm;cytosol;endoplasmic reticulum;Golgi;membrane;nucleus	catalytic activity;protein binding;structural molecule activity;transporter activity	Pf00018, Pf00595, Pf00625, Pf07653, Pf09058, Pf10600, Pf10608, Pf13180	0,488	-1,03	65,6	134,4	15,2
FALSK	High	Master Protein	D0VWV4	Succinate dehydrogenase cytochrome b560 subunit, mitochondrial [OS=Sus scrofa]	FALSK	0	12,30783053	12,4260355	2	8	2	1	169	18,506	9,82	High	High	High	High	High	High	High	High	High	High	High	High	High	High	High	High	High	High	High	High		100524676	ENSSSCG00000030318.1	LOC100524676; SDHC	4	metabolic process;transport	membrane;mitochondrion	catalytic activity;metal ion binding;protein binding	Pf01127	0,491	-1,03	65,9	134,1	4,76
FALSK	High	Master Protein	Q15555	Microtubule-associated protein RP/EB family member 2 [OS=Homo sapiens]	FALSK	0	41,4587148	44,95412844	10	31	9	1	327	37,008	5,57	High	High	High	High	High	High	High	High	High	High	High	High	High	High	High	High	High	High	High	High		10982	ENSG00000166974.12	MAPRE2	18	cell division;cell organization and biogenesis;cell proliferation;regulation of biological process;response to stimulus	cytoplasm;cytoskeleton	protein binding	Pf00307, Pf03271	0,491	-1,03	65,9	134,1	11,14
FALSK	High	Master Protein	Q16799-3	Isoform RTN1-C of Reticulon-1 [OS=Homo sapiens]	FALSK	0	24,4179224	34,61538462	7	45	3	1	208	23,561	8,91	High	High	High	High	High	High	High	High	High	High	High	High	High	High	High	High	High	High	High	High	Acetyl [N-Term]	6252	ENSG00000139970.16	RTN1	14	cell differentiation	membrane	protein binding	Pf02453	0,492	-1,02	65,9	134,1	10,3
FALSK	High	Master Protein	Q9UPR0-1	inactive phospholipase C-like protein 2 [OS=Homo sapiens]	FALSK	0	10,31005106	3,815439219	3	5	3	1	1127	125,785	6,9	High	High	High	High	High	High	High	High	High	High	High	High	High	High	High	High	High	High	High	High		23228	ENSG00000154822.16	PLCL2	3	cell differentiation;cell proliferation;metabolic process;regulation of biological process;response to stimulus	cytoplasm	catalytic activity;protein binding;signal transducer activity	Pf00168, Pf00169, Pf00387, Pf00388, Pf09279, Pf12814	0,492	-1,02	65,9	134,1	19,48
FALSK	High	Master Protein	Q16864-2	Isoform 2 of V-type proton ATPase subunit F [OS=Homo sapiens]	FALSK	0	30,64504632	36,73469388	4	28	4	1	147	16,391	5,08	High	High	High	High	High	High	High	High	High	High	High	High	High	High	High	High	High	High	High	High		9296	ENSG00000128524.4	ATP6V1F	7	cellular homeostasis;regulation of biological process;response to stimulus;transport	cytosol;membrane	catalytic activity;protein binding;transporter activity	Pf01990	0,493	-1,02	66,1	133,9	14,14
FALSK	High	Master Protein	O95757	Heat shock 70 kDa protein 4L [OS=Homo sapiens]	FALSK	0	137,6420144	36,71036949	25	105	21	1	839	94,453	5,88	High	High	High	High	High	High	High	High	High	High	High	High	High	High	High	High	High	High	High	High		22824	ENSG00000164070.11	HSPA4L	4	metabolic process;response to stimulus	cytoplasm;cytosol;nucleus	nucleotide binding	Pf00012	0,493	-1,02	66,1	133,9	10,69
FALSK	High	Master Protein	P49407-1	Beta-arrestin-1 [OS=Homo sapiens]	FALSK	0	33,43427135	26,31578947	9	38	8	1	418	47,036	6,2	High	High	High	High	High	High	High	High	High	High	High	High	High	High	High	High	High	High	High	High		408	ENSG00000137486.16	ARRB1	11	cell death;cell organization and biogenesis;metabolic process;regulation of biological process;response to stimulus;transport	chromosome;cytoplasm;cytosol;membrane;nucleus	catalytic activity;DNA binding;enzyme regulator activity;protein binding	Pf00339, Pf02752	0,494	-1,02	66,1	133,9	18,8
FALSK	High	Master Protein	Q9H598	vesicular inhibitory amino acid transporter [OS=Homo sapiens]	FALSK	0	30,41847722	17,33333333	7	14	7	1	525	57,377	6,64	High	High	High	High	High	High	High	High	High	High	High	High	High	High	High	High	High	High	High	High		140679	ENSG00000101438.3	SLC32A1	20	transport	membrane	transporter activity	Pf01490	0,494	-1,02	66,1	133,9	40,86
FALSK	High	Master Protein	Q9NX18	Succinate dehydrogenase assembly factor 2, mitochondrial [OS=Homo sapiens]	FALSK	0,000112082	7,261653795	12,04819277	2	7	2	1	166	19,587	6,8	High	High	High	High	High	High	High	High	High	High	High	High	High	High	High	High	High	High	High	High		54949	ENSG00000167985.6	SDHAF2	11	metabolic process;regulation of biological process	mitochondrion;organelle lumen	protein binding	Pf03937	0,495	-1,01	66,2	133,8	11,13
FALSK	High	Master Protein	O15394	Neural cell adhesion molecule 2 [OS=Homo sapiens]	FALSK	0	38,39623978	12,90322581	9	23	9	1	837	92,988	5,6	High	High	High	High	High	High	High	High	High	High	High	High	High	High	High	High	High	High	High	High		4685	ENSG00000154654.14	NCAM2	21		membrane	protein binding	Pf00041, Pf00047, Pf07679, Pf07686, Pf08205, Pf13895, Pf13927	0,495	-1,01	66,2	133,8	7,95
FALSK	High	Master Protein	Q15147-4	Isoform 3 of 1-phosphatidylinositol 4,5-bisphosphate phosphodiesterase beta-4 [OS=Homo sapiens]	FALSK	0	11,40827592	2,847571189	3	6	3	1	1194	136,02	6,81	High	High	High	High	High	High	High	High	High	High	High	High	High	High	High	High	High	High	High	High		5332	ENSG00000101333.16	PLCB4	20	metabolic process;regulation of biological process;response to stimulus	cytosol;endoplasmic reticulum;nucleus	catalytic activity;metal ion binding;motor activity;protein binding;signal transducer activity	Pf00168, Pf00387, Pf00388, Pf01576, Pf02463, Pf06631, Pf08703, Pf09279, Pf09731	0,496	-1,01	66,3	133,7	6,44
FALSK	High	Master Protein	O14576-1	cytoplasmic dynein 1 intermediate chain 1 [OS=Homo sapiens]	FALSK	0	31,43889218	19,2248062	6	11	6	1	645	72,91	5,12	High	High	High	High	High	High	High	High	High	High	High	High	High	High	High	High	High	High	High	High		1780	ENSG00000158560.14	DYNC1I1	7	cellular component movement;transport	chromosome;cytoplasm;cytoskeleton;cytosol;endosome;nucleus	catalytic activity;motor activity;protein binding	Pf00400, Pf11540	0,497	-1,01	66,4	133,6	18,85
FALSK	High	Master Protein	Q92558	wiskott-Aldrich syndrome protein family member 1 [OS=Homo sapiens]	FALSK	0	12,49523998	5,008944544	2	4	2	1	559	61,614	6,46	High	High	High	High	High	High	High	High	High	High	High	High	High	High	High	High	High	High	High	High		8936	ENSG00000112290.12	WASF1	6	cell organization and biogenesis;cellular component movement;regulation of biological process;response to stimulus	cytoplasm;cytoskeleton;membrane;mitochondrion	protein binding	Pf02205	0,498	-1,01	66,5	133,5	18,08
FALSK	High	Master Protein	Q9NR22	Protein arginine n-methyltransferase 8 [OS=Homo sapiens]	FALSK	0	21,87457925	16,49746193	6	17	5	1	394	45,262	6,93	High	High	High	High	High	High	High	High	High	High	High	High	High	High	High	High	High	High	High	High		56341	ENSG00000111218.11	PRMT8	12	cell organization and biogenesis;metabolic process;regulation of biological process	cytosol;membrane;nucleus	catalytic activity;protein binding	Pf08241, Pf12847, Pf13847	0,499	-1	66,6	133,4	15,1
FALSK	High	Master Protein	Q13303-3	Isoform 3 of Voltage-gated potassium channel subunit beta-2 [OS=Homo sapiens]	FALSK	0	20,51420465	14,93975904	7	13	7	1	415	46,497	8,72	High	High	High	High	High	High	High	High	High	High	High	High	High	High	High	High	High	High	High	High		8514	ENSG00000069424.14	KCNAB2	1	cell differentiation;metabolic process;regulation of biological process;transport	cytoplasm;cytosol;membrane	catalytic activity;transporter activity	Pf00248	0,5	-1	66,7	133,3	8,69
FALSK	High	Master Protein	Q8NBF6-1	Late secretory pathway protein AVL9 homolog [OS=Homo sapiens]	FALSK	0	10,714549	3,549382716	2	4	2	1	648	71,902	6,21	High	High	High	High	High	High	High	High	High	High	High	High	High	High	High	High	High	High	High	High		23080	ENSG00000105778.17	AVL9	7	cellular component movement	endosome;membrane		Pf07792, Pf09794, Pf09804	0,5	-1	66,7	133,3	13,92
FALSK	High	Master Protein	O46560	Pyridoxal kinase [OS=Sus scrofa]	FALSK	0	39,66913599	32,91925466	8	30	8	1	322	35,591	6,38	High	High	High	High	High	High	High	High	High	High	High	High	High	High	High	High	High	High	High	High		396983		PDXK		metabolic process	cytoplasm;cytosol	catalytic activity;metal ion binding;nucleotide binding	Pf00294, Pf08543	0,501	-1	66,8	133,2	9,1
FALSK	High	Master Protein	Q8TB37-1	Iron-sulfur protein NUBPL [OS=Homo sapiens]	FALSK	0	9,134567614	9,090909091	2	4	2	1	319	34,061	9,04	High	High	High	High	High	High	High	High	High	High	High	High	High	High	High	High	High	High	High	High		80224	ENSG00000151413.16	NUBPL	14	cell organization and biogenesis	mitochondrion;organelle lumen	metal ion binding;nucleotide binding	Pf01656, Pf10609	0,501	-1	66,8	133,2	23,83
FALSK	High	Master Protein	Q6NVY1	3-hydroxyisobutyryl-CoA hydrolase, mitochondrial [OS=Homo sapiens]	FALSK	0,000112082	7,302812455	6,476683938	3	4	3	1	386	43,454	8,19	High	High	High	High	High	High	High	High	High	High	High	High	High	High	High	High	High	High	High	High		26275	ENSG00000198130.15	HIBCH	2	metabolic process	mitochondrion;organelle lumen	catalytic activity	Pf00378, Pf13766	0,502	-0,99	66,8	133,2	24,48
FALSK	High	Master Protein	Q7KZN9	Cytochrome c oxidase assembly protein COX15 homolog [OS=Homo sapiens]	FALSK	0,000396275	5,220974093	5,609756098	2	4	2	1	410	46	9,82	High	High	High	High	High	High	High	High	High	High	High	High	High	High	High	High	High	High	High	High		1355	ENSG00000014919.12	COX15	10	cell organization and biogenesis;metabolic process;transport	membrane;mitochondrion	catalytic activity;transporter activity	Pf02628	0,502	-0,99	66,9	133,1	5,43
FALSK	High	Master Protein	Q9UD71-1	Protein phosphatase 1 regulatory subunit 1B [OS=Homo sapiens]	FALSK	0,000482114	4,854421446	13,7254902	2	3	2	1	204	22,949	4,53	High	High	High	High	High	High	High	High	High	High	High	High	High	High	High	High	High	High	High	High		84152	ENSG00000131771.13	PPP1R1B	17	metabolic process;regulation of biological process;response to stimulus	cytoplasm;cytosol;nucleus	enzyme regulator activity;protein binding	Pf05395	0,502	-0,99	66,9	133,1	25,77
FALSK	High	Master Protein	Q8N9F7	Glycerophosphodiester phosphodiesterase domain-containing protein 1 [OS=Homo sapiens]	FALSK	0	15,43025272	14,33121019	3	3	3	1	314	36,144	8,47	High	High	High	High	High	Not Found	Not Found	Not Found	Not Found	Not Found	High	High	High	High	High	High	Not Found	High	High	Not Found		284161	ENSG00000153982.10	GDPD1	17	metabolic process	cytoplasm;membrane	catalytic activity;metal ion binding	Pf03009, Pf13653	0,502	-0,99	66,9	133,1	16,81
FALSK	High	Master Protein	Q9UBB4-1	Ataxin-10 [OS=Homo sapiens]	FALSK	0	23,58107873	13,05263158	5	8	5	1	475	53,455	5,25	High	High	High	High	High	High	High	High	High	High	High	High	High	High	High	High	High	High	High	High		25814	ENSG00000130638.15	ATXN10	22	cell organization and biogenesis	cytoplasm;cytosol;membrane	protein binding	Pf09759	0,503	-0,99	66,9	133,1	11,54
FALSK	High	Master Protein	P61018-2	Isoform 2 of Ras-related protein Rab-4B [OS=Homo sapiens]	FALSK	0	25,53335987	38,70967742	7	32	5	1	248	27,489	6,35	High	High	High	High	High	High	High	High	High	High	High	High	High	High	High	High	High	High	High	High		53916		RAB4B	19	regulation of biological process;response to stimulus;transport	endosome;membrane	nucleotide binding;protein binding	Pf00009, Pf00025, Pf00071, Pf04670, Pf08477	0,503	-0,99	66,9	133,1	7,96
FALSK	High	Master Protein	Q9HCG7	Non-lysosomal glucosylceramidase [OS=Homo sapiens]	FALSK	0	19,12442344	6,796116505	4	5	4	1	927	104,581	5,92	High	High	High	High	High	High	High	High	High	High	High	High	High	High	High	High	High	High	High	High		57704	ENSG00000070610.14	GBA2	9	metabolic process	endoplasmic reticulum;Golgi;membrane	catalytic activity	Pf04685, Pf12215	0,504	-0,99	67	133	23,27
FALSK	High	Master Protein	P43004-1	excitatory amino acid transporter 2 [OS=Homo sapiens]	FALSK	0	20,38908279	10,97560976	5	10	5	1	574	62,064	6,54	High	High	High	High	High	High	High	High	High	High	High	High	High	High	High	High	High	High	High	High		6506	ENSG00000110436.11	SLC1A2	11	cell communication;regulation of biological process;response to stimulus;transport	cell surface;membrane	protein binding;transporter activity	Pf00375	0,505	-0,99	67,1	132,9	15,6
FALSK	High	Master Protein	P31150	Rab GDP dissociation inhibitor alpha [OS=Homo sapiens]	FALSK	0	114,8767959	47,65100671	16	101	8	1	447	50,55	5,14	High	High	High	High	High	High	High	High	High	High	High	High	High	High	High	High	High	High	High	High		2664	ENSG00000203879.11	GDI1	X	metabolic process;regulation of biological process;response to stimulus;transport	cytoplasm;cytosol;Golgi	catalytic activity;enzyme regulator activity;protein binding	Pf00996	0,505	-0,98	67,2	132,8	10,34
FALSK	High	Master Protein	Q96F85-1	CB1 cannabinoid receptor-interacting protein 1 [OS=Homo sapiens]	FALSK	0	14,07281312	29,26829268	4	13	4	1	164	18,637	7,94	High	High	High	High	High	High	High	High	High	High	High	High	High	High	High	High	High	High	High	High		25927	ENSG00000119865.8	CNRIP1	2				Pf09972, Pf15043	0,506	-0,98	67,2	132,8	13,42
FALSK	High	Master Protein	Q9Y4E6-1	WD repeat-containing protein 7 [OS=Homo sapiens]	FALSK	0	62,25347709	15,70469799	15	26	15	1	1490	163,705	6,92	High	High	High	High	High	High	High	High	High	High	High	High	High	High	High	High	High	High	High	High		23335	ENSG00000091157.13	WDR7	18	cell differentiation	cytoplasm	protein binding	Pf00400	0,506	-0,98	67,2	132,8	8,97
FALSK	High	Master Protein	Q13509	tubulin beta-3 chain [OS=Homo sapiens]	FALSK	0	221,5046726	64,22222222	21	413	6	1	450	50,4	4,93	High	High	High	High	High	High	High	High	High	High	High	High	High	High	High	High	High	High	High	High		10381	ENSG00000258947.6	TUBB3	16	cell differentiation;cell organization and biogenesis;cellular component movement	cytoplasm;cytoskeleton;nucleus	catalytic activity;nucleotide binding;protein binding;structural molecule activity	Pf00091, Pf03953, Pf10644	0,506	-0,98	67,2	132,8	13,33
FALSK	High	Master Protein	P36405	ADP-ribosylation factor-like protein 3 [OS=Homo sapiens]	FALSK	0	68,41594422	77,47252747	10	31	10	1	182	20,443	7,24	High	High	High	High	High	High	High	High	High	High	High	High	High	High	High	High	High	High	High	High		403	ENSG00000138175.8	ARL3	10	cell division;cell organization and biogenesis;cellular component movement;regulation of biological process;response to stimulus;transport	cytoplasm;cytoskeleton;Golgi;membrane;nucleus	catalytic activity;metal ion binding;nucleotide binding;protein binding;signal transducer activity	Pf00009, Pf00025, Pf00071, Pf00503, Pf01926, Pf04670, Pf08477, Pf09439	0,507	-0,98	67,3	132,7	7,86
FALSK	High	Master Protein	Q15773	Myeloid leukemia factor 2 [OS=Homo sapiens]	FALSK	0	9,774626059	15,72580645	3	4	3	1	248	28,129	6,9	High	High	High	High	High	High	High	High	High	High	High	High	High	High	High	High	High	High	High	High		8079	ENSG00000089693.10	MLF2	12	defense response;regulation of biological process;response to stimulus	cytoplasm;membrane;nucleus	DNA binding;protein binding	Pf10248	0,507	-0,98	67,3	132,7	16,59
FALSK	High	Master Protein	P23220	Plasma membrane calcium-transporting ATPase 1 [OS=Sus scrofa]	FALSK	0	142,5011066	25,90163934	24	94	2	1	1220	134,625	5,86	High	High	High	High	High	High	High	High	High	High	High	High	High	High	High	High	High	High	High	High		397636		ATP2B1	5	cellular homeostasis;transport	membrane	catalytic activity;metal ion binding;nucleotide binding;protein binding;transporter activity	Pf00122, Pf00689, Pf00690, Pf00702, Pf08282, Pf12424, Pf12710, Pf13246	0,508	-0,98	67,4	132,6	11,76
FALSK	High	Master Protein	P14867	Gamma-aminobutyric acid receptor subunit alpha-1 [OS=Homo sapiens]	FALSK	0,000750469	4,15385725	4,385964912	2	3	1	1	456	51,769	9,22	Not Found	Not Found	Not Found	Not Found	Not Found	High	High	High	High	High	Not Found	Not Found	Not Found	Not Found	Not Found	High	High	High	High	High		2554	ENSG00000022355.16	GABRA1	5	cell communication;regulation of biological process;response to stimulus;transport	membrane	receptor activity;signal transducer activity;transporter activity	Pf02931, Pf02932	0,508	-0,98	67,4	132,6	47,9
FALSK	High	Master Protein	Q8N4Q1-2	Isoform 2 of Mitochondrial intermembrane space import and assembly protein 40 [OS=Homo sapiens]	FALSK	0,000482114	4,638925797	10,96774194	2	4	2	1	155	17,374	4,39	High	High	High	High	High	High	High	High	High	High	High	High	High	High	High	High	High	High	High	High		131474	ENSG00000163528.12	CHCHD4	3	metabolic process;transport	mitochondrion	catalytic activity	Pf06747	0,509	-0,98	67,4	132,6	11,37
FALSK	High	Master Protein	P52306-4	Isoform 4 of Rap1 GTPase-GDP dissociation stimulator 1 [OS=Homo sapiens]	FALSK	0	79,73968411	36,57331137	16	60	2	1	607	66,275	5,31	High	High	High	High	High	High	High	High	High	High	High	High	High	High	High	High	High	High	High	High		5910	ENSG00000138698.14	RAP1GDS1	4	cellular homeostasis;regulation of biological process;response to stimulus	cytosol;endoplasmic reticulum;mitochondrion	enzyme regulator activity;protein binding	Pf00514	0,509	-0,97	67,4	132,6	15,94
FALSK	High	Master Protein	P16298-4	Isoform 4 of Serine/threonine-protein phosphatase 2B catalytic subunit beta isoform [OS=Homo sapiens]	FALSK	0	36,91314326	21,9047619	10	29	5	1	525	59,086	5,91	High	High	High	High	High	High	High	High	High	High	High	High	High	High	High	High	High	High	High	High		5532	ENSG00000107758.15	PPP3CB	10	cell differentiation;cell growth;cell proliferation;metabolic process;regulation of biological process;response to stimulus;transport	cytosol;membrane	catalytic activity;metal ion binding;protein binding	Pf00149	0,509	-0,97	67,4	132,6	9,02
FALSK	High	Master Protein	Q9Y5J9	mitochondrial import inner membrane translocase subunit Tim8 B [OS=Homo sapiens]	FALSK	0	8,975422661	34,93975904	3	7	3	1	83	9,338	5,12	High	High	High	High	High	High	High	High	High	High	High	High	High	High	High	High	High	High	High	High		26521	ENSG00000150779.11	TIMM8B	11	transport	membrane;mitochondrion	metal ion binding	Pf02953	0,509	-0,97	67,4	132,6	5,99
FALSK	High	Master Protein	Q5T4D3-3	Isoform 3 of Transmembrane and TPR repeat-containing protein 4 [OS=Homo sapiens]	FALSK	0,000396275	4,968933612	3,815789474	2	2	2	1	760	84,951	9	Not Found	Not Found	Not Found	Not Found	Not Found	High	High	High	High	High	Not Found	Not Found	Not Found	Not Found	Not Found	High	High	High	High	High		84899	ENSG00000125247.15	TMTC4	13			protein binding	Pf00515, Pf07719, Pf08409, Pf13181, Pf13414, Pf13424, Pf13431, Pf13432, Pf14559	0,509	-0,97	67,5	132,5	21,62
FALSK	High	Master Protein	Q8NFD5-3	Isoform 3 of AT-rich interactive domain-containing protein 1B [OS=Homo sapiens]	FALSK	0	9,355210178	1,092179991	2	2	2	1	2289	241,31	6,67	High	High	High	High	High	Not Found	Not Found	Not Found	Not Found	Not Found	High	High	High	High	High	Not Found	Not Found	Not Found	Not Found	Not Found		57492	ENSG00000049618.22	ARID1B	6	cell organization and biogenesis;metabolic process;regulation of biological process	cytoplasm	DNA binding;protein binding	Pf01388, Pf03153, Pf09770, Pf12031	0,511	-0,97	67,6	132,4	19,21
FALSK	High	Master Protein	P60880-2	Isoform 2 of Synaptosomal-associated protein 25 [OS=Homo sapiens]	FALSK	0	54,97168592	57,76699029	10	44	2	1	206	23,321	4,86	High	High	High	High	High	High	High	High	High	High	High	High	High	High	High	High	High	High	High	High		6616	ENSG00000132639.12	SNAP25	20	cell communication;cell organization and biogenesis;regulation of biological process;response to stimulus;transport	cytoplasm;cytosol;membrane	protein binding	Pf00835, Pf05739	0,511	-0,97	67,6	132,4	16,34
FALSK	High	Master Protein	Q7YS91	Protein TBRG4 [OS=Sus scrofa]	FALSK	0	11,23602409	5,221518987	2	3	2	1	632	71,175	9,16	High	High	High	High	High	High	High	High	High	High	High	High	High	High	High	High	High	High	High	High		397641		CPR2; TBRG4	18	metabolic process	mitochondrion	catalytic activity	Pf06743, Pf08368, Pf08373	0,511	-0,97	67,7	132,3	11,56
FALSK	High	Master Protein	Q007T0	Succinate dehydrogenase [ubiquinone] iron-sulfur subunit, mitochondrial [OS=Sus scrofa]	FALSK	0	36,2246004	34,64285714	7	17	3	1	280	31,565	8,38	High	High	High	High	High	High	High	High	High	High	High	High	High	High	High	High	High	High	High	High		414412		SDHB	6	metabolic process;transport	membrane;mitochondrion	catalytic activity;metal ion binding;protein binding	Pf13085, Pf13183, Pf13534	0,512	-0,97	67,7	132,3	12,87
FALSK	High	Master Protein	Q96DB5	regulator of microtubule dynamics protein 1 [OS=Homo sapiens]	FALSK	0	28,82845495	26,11464968	8	16	7	1	314	35,785	8,5	High	High	High	High	High	High	High	High	High	High	High	High	High	High	High	High	High	High	High	High		51115	ENSG00000176623.11	FAM82B; RMDN1	8		cytoplasm;cytoskeleton;mitochondrion	protein binding		0,514	-0,96	67,9	132,1	8,09
FALSK	High	Master Protein	Q14119	Vascular endothelial zinc finger 1 [OS=Homo sapiens]	FALSK	0	13,00552375	7,101727447	3	5	3	1	521	56,895	9,52	High	High	High	High	High	High	High	High	High	High	High	High	High	High	High	High	High	High	High	High		7716	ENSG00000136451.8	VEZF1	17	defense response;metabolic process;regulation of biological process;response to stimulus	nucleus	DNA binding;metal ion binding	Pf13465	0,514	-0,96	67,9	132,1	21,54
FALSK	High	Master Protein	O94921-1	Cyclin-dependent kinase 14 [OS=Homo sapiens]	FALSK	0,000396275	6,793164629	5,117270789	2	5	1	1	469	53,023	8,92	High	High	High	High	High	High	High	High	High	High	High	High	High	High	High	High	High	High	High	High		5218	ENSG00000058091.16	CDK14	7	cell division;metabolic process;regulation of biological process;response to stimulus	cytoplasm;cytosol;membrane;nucleus	catalytic activity;nucleotide binding;protein binding	Pf00069, Pf07714	0,515	-0,96	67,9	132,1	27,2
FALSK	High	Master Protein	P05165-1	Propionyl-CoA carboxylase alpha chain, mitochondrial [OS=Homo sapiens]	FALSK	0	14,57183307	7,967032967	5	9	5	1	728	80,008	7,52	High	High	High	High	High	High	High	High	High	High	High	High	High	High	High	High	High	High	High	High		5095	ENSG00000175198.15	PCCA	13	metabolic process	cytosol;extracellular;mitochondrion;organelle lumen	catalytic activity;metal ion binding;nucleotide binding;protein binding	Pf00289, Pf00364, Pf01071, Pf02222, Pf02258, Pf02785, Pf02786, Pf07478, Pf08442, Pf08443, Pf13437, Pf13533, Pf13535, Pf13549, Pf15632	0,515	-0,96	68	132	10,85
FALSK	High	Master Protein	Q99747	Gamma-soluble NSF attachment protein [OS=Homo sapiens]	FALSK	0	49,98360455	32,37179487	10	32	10	1	312	34,724	5,41	High	High	High	High	High	High	High	High	High	High	High	High	High	High	High	High	High	High	High	High		8774	ENSG00000134265.12	NAPG	18	cell organization and biogenesis;regulation of biological process;transport	membrane;mitochondrion	protein binding	Pf14938	0,515	-0,96	68	132	10,02
FALSK	High	Master Protein	O96008	Mitochondrial import receptor subunit TOM40 homolog [OS=Homo sapiens]	FALSK	0	30,22331691	21,05263158	6	17	6	1	361	37,869	7,25	High	High	High	High	High	High	High	High	High	High	High	High	High	High	High	High	High	High	High	High		10452	ENSG00000130204.12	TOMM40	19	cell communication;metabolic process;response to stimulus;transport	cytoplasm;membrane;mitochondrion	protein binding;transporter activity	Pf01459	0,515	-0,96	68	132	16,36
FALSK	High	Master Protein	P30044-1	Peroxiredoxin-5, mitochondrial [OS=Homo sapiens]	FALSK	0	40,83417679	30,8411215	5	36	5	1	214	22,073	8,7	High	High	High	High	High	High	High	High	High	High	High	High	High	High	High	High	High	High	High	High		25824	ENSG00000126432.13	PRDX5	11	cell death;cellular homeostasis;defense response;metabolic process;regulation of biological process;response to stimulus	cytoplasm;cytosol;mitochondrion;nucleus;organelle lumen	antioxidant activity;catalytic activity;DNA binding;enzyme regulator activity;protein binding	Pf00578, Pf08534	0,516	-0,95	68,1	131,9	13,67
FALSK	High	Master Protein	Q13557-10	Isoform Delta 10 of Calcium/calmodulin-dependent protein kinase type II subunit delta [OS=Homo sapiens]	FALSK	0	89,61963417	36,38211382	14	89	1	1	492	55,624	7,15	High	High	High	High	High	High	High	High	High	High	High	High	High	High	High	High	High	High	High	High		817	ENSG00000145349.16	CAMK2D	4	cell growth;cell organization and biogenesis;cellular component movement;cellular homeostasis;metabolic process;regulation of biological process;response to stimulus;transport	cytoplasm;cytosol;membrane;nucleus	catalytic activity;nucleotide binding;protein binding	Pf00069, Pf07714, Pf08332, Pf12680, Pf13474, Pf14534	0,516	-0,95	68,1	131,9	17,7
FALSK	High	Master Protein	Q9NQX3-2	Isoform 2 of Gephyrin [OS=Homo sapiens]	FALSK	0	118,9408507	40,18205462	22	47	22	1	769	83,395	5,58	High	High	High	High	High	High	High	High	High	High	High	High	High	High	High	High	High	High	High	High		10243	ENSG00000171723.15	GPHN	14	cell organization and biogenesis;metabolic process	cytoplasm;cytoskeleton;membrane	catalytic activity;metal ion binding;nucleotide binding;protein binding	Pf00994, Pf03453, Pf03454	0,516	-0,95	68,1	131,9	16,72
FALSK	High	Master Protein	Q9UIW2	Plexin-A1 [OS=Homo sapiens]	FALSK	0	25,22035664	4,219409283	8	11	3	1	1896	210,933	6,92	High	High	High	High	High	High	High	High	High	High	High	High	High	High	High	High	High	High	High	High		5361	ENSG00000114554.11	PLXNA1	3	cell growth;cellular component movement;development;regulation of biological process;response to stimulus	cytoplasm;membrane;nucleus	protein binding;receptor activity;signal transducer activity	Pf01403, Pf01437, Pf01833, Pf08337	0,516	-0,95	68,1	131,9	8,71
FALSK	High	Master Protein	Q02790	Peptidyl-prolyl cis-trans isomerase FKBP4 [OS=Homo sapiens]	FALSK	0	27,77695752	13,28976035	7	29	7	1	459	51,772	5,43	High	High	High	High	High	High	High	High	High	High	High	High	High	High	High	High	High	High	High	High		2288	ENSG00000004478.7	FKBP4	12	cell organization and biogenesis;metabolic process;regulation of biological process;response to stimulus;transport	cytoplasm;cytoskeleton;cytosol;membrane;mitochondrion;nucleus	catalytic activity;nucleotide binding;protein binding;RNA binding	Pf00254, Pf00515, Pf07719, Pf13174, Pf13371, Pf13414, Pf13424, Pf13432, Pf14559	0,516	-0,95	68,1	131,9	9,59
FALSK	High	Master Protein	Q29307	ATPase inhibitor, mitochondrial [OS=Sus scrofa]	FALSK	0,000396275	5,789073372	24,07407407	3	8	3	1	108	12,176	9,35	High	High	High	High	High	High	High	High	High	High	High	High	High	High	High	High	High	High	High	High		100038002	ENSSSCG00000027072.1	ATPIF1	6	cell differentiation;cell organization and biogenesis;metabolic process;regulation of biological process	cell surface;mitochondrion	catalytic activity;enzyme regulator activity;protein binding	Pf04568, Pf04977, Pf10186	0,517	-0,95	68,2	131,8	8,98
FALSK	High	Master Protein	Q86YM7-1	Homer protein homolog 1 [OS=Homo sapiens]	FALSK	0,000396275	6,040071835	6,779661017	2	3	1	1	354	40,252	5,44	Not Found	Not Found	Not Found	Not Found	Not Found	High	High	High	High	High	Not Found	Not Found	Not Found	Not Found	Not Found	High	High	High	High	High		9456	ENSG00000152413.14	HOMER1	5	cell communication;metabolic process;regulation of biological process;response to stimulus	cytoplasm;membrane	protein binding	Pf00568, Pf04111, Pf04156	0,518	-0,95	68,3	131,7	15,93
FALSK	High	Master Protein	P20337	Ras-related protein Rab-3B [OS=Homo sapiens]	FALSK	0	27,86210926	28,76712329	5	55	1	1	219	24,742	5,02	High	High	High	High	High	Not Found	Not Found	Not Found	Not Found	Not Found	High	High	High	High	High	Not Found	Not Found	Not Found	Not Found	Not Found		5865	ENSG00000169213.6	RAB3B	1	cell organization and biogenesis;metabolic process;regulation of biological process;response to stimulus;transport	cytoplasm;cytosol;membrane	catalytic activity;nucleotide binding;protein binding	Pf00025, Pf00071, Pf08477	0,519	-0,95	68,4	131,6	13,79
FALSK	High	Master Protein	Q9NVK5-1	FGFR1 oncogene partner 2 [OS=Homo sapiens]	FALSK	0	8,109119777	9,881422925	2	2	2	1	253	29,408	6	High	High	High	High	High	Not Found	Not Found	Not Found	Not Found	Not Found	High	High	High	High	High	Not Found	Not Found	Not Found	Not Found	Not Found		26127	ENSG00000111790.13	FGFR1OP2	12	metabolic process;response to stimulus	cytoplasm;cytosol	catalytic activity;protein binding	Pf05769, Pf11262	0,519	-0,95	68,4	131,6	16,32
FALSK	High	Master Protein	O75569-1	Interferon-inducible double-stranded RNA-dependent protein kinase activator A [OS=Homo sapiens]	FALSK	0	53,57059741	40,57507987	10	31	10	1	313	34,383	8,41	High	High	High	High	High	High	High	High	High	High	High	High	High	High	High	High	High	High	High	High		8575	ENSG00000180228.12	PRKRA	2	metabolic process;regulation of biological process;response to stimulus	cytoplasm;cytosol;membrane	enzyme regulator activity;protein binding;RNA binding	Pf00035, Pf14709	0,519	-0,94	68,4	131,6	13,15
FALSK	High	Master Protein	Q9UJ14-1	Gamma-glutamyltransferase 7 [OS=Homo sapiens]	FALSK	0	11,5174494	5,589123867	2	4	2	1	662	70,423	5,1	High	High	High	High	High	High	High	High	High	High	High	High	High	High	High	High	High	High	High	High		2686	ENSG00000131067.16	GGT7	20	metabolic process	membrane	catalytic activity;protein binding	Pf01019	0,521	-0,94	68,5	131,5	12,93
FALSK	High	Master Protein	P84103	Serine/arginine-rich splicing factor 3 [OS=Homo sapiens]	FALSK	0	17,19599408	18,90243902	3	25	2	1	164	19,318	11,65	High	High	High	High	High	High	High	High	High	High	High	High	High	High	High	High	High	High	High	High		6428	ENSG00000112081.16	SRSF3	6	metabolic process;regulation of biological process;transport	cytoplasm;nucleus	nucleotide binding;protein binding;RNA binding	Pf00076, Pf13893, Pf14259	0,521	-0,94	68,5	131,5	7,03
FALSK	High	Master Protein	P43007-1	neutral amino acid transporter A [OS=Homo sapiens]	FALSK	0	16,07785553	10,71428571	4	8	3	1	532	55,688	6,25	High	High	High	High	High	High	High	High	High	High	High	High	High	High	High	High	High	High	High	High		6509	ENSG00000115902.10	SLC1A4	2	cell communication;transport	cell surface;membrane	transporter activity	Pf00375	0,521	-0,94	68,5	131,5	19,08
FALSK	High	Master Protein	P21953	2-oxoisovalerate dehydrogenase subunit beta, mitochondrial [OS=Homo sapiens]	FALSK	0,000112082	7,365280499	5,612244898	2	5	2	1	392	43,095	6,29	High	High	High	High	High	High	High	High	High	High	High	High	High	High	High	High	High	High	High	High		594	ENSG00000083123.14	BCKDHB	6	metabolic process	mitochondrion;organelle lumen	catalytic activity;protein binding	Pf02779, Pf02780	0,522	-0,94	68,6	131,4	18,45
FALSK	High	Master Protein	Q9UNW9	RNA-binding protein Nova-2 [OS=Homo sapiens]	FALSK	0	40,69623864	29,87804878	9	15	6	1	492	48,979	8,16	High	High	High	High	High	High	High	High	High	High	High	High	High	High	High	High	High	High	High	High		4858	ENSG00000104967.6	NOVA2	19	metabolic process;regulation of biological process	nucleus	RNA binding	Pf00013, Pf13014	0,522	-0,94	68,6	131,4	10,9
FALSK	High	Master Protein	Q9GZN7	Protein rogdi homolog [OS=Homo sapiens]	FALSK	0	10,48029101	11,8466899	3	7	3	1	287	32,234	8,16	High	High	High	High	High	High	High	High	High	High	High	High	High	High	High	High	High	High	High	High		79641	ENSG00000067836.12	ROGDI	16	cell differentiation;regulation of biological process	nucleus		Pf10259	0,523	-0,94	68,7	131,3	19,36
FALSK	High	Master Protein	P21281	V-type proton ATPase subunit B, brain isoform [OS=Homo sapiens]	FALSK	0	113,6932349	45,7925636	16	80	16	1	511	56,465	5,81	High	High	High	High	High	High	High	High	High	High	High	High	High	High	High	High	High	High	High	High		526	ENSG00000147416.10	ATP6V1B2	8	cellular homeostasis;metabolic process;regulation of biological process;response to stimulus;transport	cytoplasm;cytosol;membrane	catalytic activity;nucleotide binding;protein binding;transporter activity	Pf00006, Pf00306, Pf02874	0,523	-0,93	68,7	131,3	9,23
FALSK	High	Master Protein	P00571	Adenylate kinase isoenzyme 1 [OS=Sus scrofa]	FALSK	0	44,16241462	54,12371134	9	45	9	1	194	21,625	8,31	High	High	High	High	High	High	High	High	High	High	High	High	High	High	High	High	High	High	High	High		100521423	ENSSSCG00000005627.1	LOC100521423; AK1	1	metabolic process;regulation of biological process	cytoplasm;membrane	catalytic activity;nucleotide binding	Pf00406, Pf01712, Pf13207, Pf13238, Pf13401, Pf13671	0,523	-0,93	68,7	131,3	11,5
FALSK	High	Master Protein	Q9UM19	Hippocalcin-like protein 4 [OS=Homo sapiens]	FALSK	0	19,38997385	35,60209424	5	18	4	1	191	22,188	4,89	High	High	High	High	High	High	High	High	High	High	High	High	High	High	High	High	High	High	High	High		51440	ENSG00000116983.12	HPCAL4	1	regulation of biological process;response to stimulus		metal ion binding;protein binding	Pf00036, Pf13202, Pf13405, Pf13499	0,523	-0,93	68,7	131,3	18,18
FALSK	High	Master Protein	Q86XE3	Calcium uptake protein 3, mitochondrial [OS=Homo sapiens]	FALSK	0	10,69816683	7,924528302	3	6	3	1	530	60,673	8,21	High	High	High	High	High	High	High	High	High	High	High	High	High	High	High	High	High	High	High	High		286097	ENSG00000155970.11	EFHA2; MICU3	8		membrane;mitochondrion	metal ion binding	Pf00036, Pf13833	0,526	-0,93	68,9	131,1	19,95
FALSK	High	Master Protein	O43166-1	Signal-induced proliferation-associated 1-like protein 1 [OS=Homo sapiens]	FALSK	0,001553197	3,320433842	1,10864745	2	2	2	1	1804	199,904	8,19	High	High	High	High	High	Not Found	Not Found	Not Found	Not Found	Not Found	High	High	High	High	High	Not Found	Not Found	Not Found	Not Found	Not Found		26037	ENSG00000197555.9	SIPA1L1	14	cell organization and biogenesis;regulation of biological process;response to stimulus	cytoplasm;cytoskeleton;membrane	enzyme regulator activity;protein binding	Pf00595, Pf02145, Pf11881	0,526	-0,93	69	131	6,73
FALSK	High	Master Protein	O75914-3	Isoform 3 of Serine/threonine-protein kinase PAK 3 [OS=Homo sapiens]	FALSK	0	36,64999238	18,62068966	9	41	3	1	580	64,49	5,53	High	High	High	High	High	High	High	High	High	High	High	High	High	High	High	High	High	High	High	High		5063	ENSG00000077264.14	PAK3	X	cell organization and biogenesis;metabolic process;regulation of biological process;response to stimulus	cytoplasm;cytosol;endosome;membrane	catalytic activity;metal ion binding;nucleotide binding;protein binding;signal transducer activity	Pf00069, Pf00786, Pf07714, Pf14531	0,527	-0,93	69	131	19,67
FALSK	High	Master Protein	Q9C0B1-1	alpha-ketoglutarate-dependent dioxygenase FTO [OS=Homo sapiens]	FALSK	0	18,33892443	11,08910891	4	8	4	1	505	58,245	5,22	High	High	High	High	High	High	High	High	High	High	High	High	High	High	High	High	High	High	High	High		79068	ENSG00000140718.19	FTO	16	metabolic process;regulation of biological process;response to stimulus	nucleus	catalytic activity;metal ion binding	Pf12933, Pf12934	0,527	-0,92	69	131	14,75
FALSK	High	Master Protein	Q9UM54-3	Unconventional myosin-VI [OS=Homo sapiens]	FALSK	0	152,7449963	29,36630603	32	96	1	1	1294	149,596	8,53	High	High	High	High	High	High	High	High	High	High	High	High	High	High	High	High	High	High	High	High		4646		MYO6	6	cellular component movement;regulation of biological process;response to stimulus;transport	cytoplasm;cytosol;Golgi;membrane;nucleus	catalytic activity;motor activity;nucleotide binding;protein binding	Pf00063, Pf00529	0,528	-0,92	69,1	130,9	13,5
FALSK	High	Master Protein	Q9NZ01-1	Very-long-chain enoyl-CoA reductase [OS=Homo sapiens]	FALSK	0	14,80100148	13,31168831	4	10	4	1	308	36,011	9,45	High	High	High	High	High	High	High	High	High	High	High	High	High	High	High	High	High	High	High	High		9524	ENSG00000099797.12	TECR	19	metabolic process	cytoplasm;endoplasmic reticulum;membrane;nucleus	catalytic activity;protein binding	Pf02544	0,528	-0,92	69,1	130,9	8,21
FALSK	High	Master Protein	O95741-2	Isoform 2 of Copine-6 [OS=Homo sapiens]	FALSK	0	29,33653441	16,66666667	8	16	7	1	612	67,598	5,91	High	High	High	High	High	High	High	High	High	High	High	High	High	High	High	High	High	High	High	High		9362	ENSG00000100884.9	CPNE6	14	cell communication;metabolic process;response to stimulus;transport	endosome;membrane	metal ion binding;protein binding;transporter activity	Pf00092, Pf00168, Pf07002, Pf10138	0,529	-0,92	69,2	130,8	20,84
FALSK	High	Master Protein	P07305	Histone H1.0 [OS=Homo sapiens]	FALSK	0	21,8437196	11,8556701	2	27	2	1	194	20,85	10,84	High	High	High	High	High	High	High	High	High	High	High	High	High	High	High	High	High	High	High	High		3005	ENSG00000189060.5	H1F0	22	cell organization and biogenesis;metabolic process	chromosome;cytoskeleton;Golgi;nucleus	DNA binding;protein binding;RNA binding	Pf00538	0,529	-0,92	69,2	130,8	35,68
FALSK	High	Master Protein	Q27HK4	Metaxin-1 [OS=Sus scrofa]	FALSK	0	31,36773196	36,59305994	8	14	8	1	317	35,746	6,35	High	High	High	High	High	High	High	High	High	High	High	High	High	High	High	High	High	High	High	High		664654	ENSSSCG00000006523.2	MTX1	4	transport	membrane;mitochondrion		Pf10568, Pf11801, Pf13410	0,529	-0,92	69,2	130,8	12,35
FALSK	High	Master Protein	Q9Y6R1-1	Electrogenic sodium bicarbonate cotransporter 1 [OS=Homo sapiens]	FALSK	0	10,92587914	3,985171455	3	6	1	1	1079	121,383	6,8	High	High	High	High	High	Not Found	Not Found	Not Found	Not Found	Not Found	High	High	High	High	High	Not Found	Not Found	Not Found	Not Found	Not Found		8671	ENSG00000080493.14	SLC4A4	4	cellular homeostasis;transport	membrane	protein binding;transporter activity	Pf00359, Pf00955, Pf03606, Pf07565	0,529	-0,92	69,2	130,8	16,17
FALSK	High	Master Protein	Q8N4T8	Carbonyl reductase family member 4 [OS=Homo sapiens]	FALSK	0	7,800413199	10,12658228	2	5	2	1	237	25,285	9,33	High	High	High	High	High	High	High	High	High	High	High	High	High	High	High	High	High	High	High	High		84869	ENSG00000145439.11	CBR4	4	cell organization and biogenesis;metabolic process	mitochondrion;organelle lumen	catalytic activity;nucleotide binding;protein binding	Pf00106, Pf08659, Pf13561	0,529	-0,92	69,2	130,8	48,86
FALSK	High	Master Protein	Q4VC31	coiled-coil domain-containing protein 58 [OS=Homo sapiens]	FALSK	0	14,50412128	36,11111111	4	10	4	1	144	16,609	7,81	High	High	High	High	High	High	High	High	High	High	High	High	High	High	High	High	High	High	High	High		131076	ENSG00000160124.9	CCDC58	3		mitochondrion		Pf09774	0,53	-0,92	69,2	130,8	9,64
FALSK	High	Master Protein	O95718-1	Steroid hormone receptor ERR2 [OS=Homo sapiens]	FALSK	0	13,34378991	9,448818898	3	4	1	1	508	56,171	8,28	Not Found	Not Found	Not Found	Not Found	Not Found	High	High	High	High	High	Not Found	Not Found	Not Found	Not Found	Not Found	High	High	High	High	High		2103	ENSG00000119715.14	ESRRB	14	metabolic process;regulation of biological process;response to stimulus	nucleus	DNA binding;metal ion binding;protein binding;receptor activity;signal transducer activity	Pf00104, Pf00105	0,53	-0,92	69,2	130,8	12,06
FALSK	High	Master Protein	Q9H1K1	Iron-sulfur cluster assembly enzyme ISCU, mitochondrial [OS=Homo sapiens]	FALSK	0	14,5273835	25,74850299	3	6	3	1	167	17,988	9,48	High	High	High	High	High	High	High	High	High	High	High	High	High	High	High	High	High	High	High	High		23479	ENSG00000136003.15	ISCU	12	cell organization and biogenesis;cellular homeostasis;metabolic process	cytoplasm;cytosol;mitochondrion;nucleus;organelle lumen	catalytic activity;metal ion binding;protein binding;structural molecule activity	Pf01592	0,53	-0,92	69,3	130,7	7,2
FALSK	High	Master Protein	Q9Y6C9	Mitochondrial carrier homolog 2 [OS=Homo sapiens]	FALSK	0	20,25437208	15,18151815	4	11	4	1	303	33,309	7,97	High	High	High	High	High	High	High	High	High	High	High	High	High	High	High	High	High	High	High	High		23788	ENSG00000109919.9	MTCH2	11	cell death;cell organization and biogenesis;cellular component movement;metabolic process;regulation of biological process;response to stimulus;transport	membrane;mitochondrion;nucleus		Pf00153	0,531	-0,91	69,4	130,6	11,88
FALSK	High	Master Protein	Q96QR8	Transcriptional activator protein Pur-beta [OS=Homo sapiens]	FALSK	0	21,99832227	22,11538462	4	15	4	1	312	33,22	5,43	High	High	High	High	High	High	High	High	High	High	High	High	High	High	High	High	High	High	High	High		5814	ENSG00000146676.7	PURB	7	cell differentiation;cell proliferation;metabolic process;regulation of biological process	nucleus	DNA binding;protein binding;RNA binding	Pf04845	0,531	-0,91	69,4	130,6	9,46
FALSK	High	Master Protein	A6NDG6	glycerol-3-phosphate phosphatase [OS=Homo sapiens]	FALSK	0	19,38584121	17,13395639	4	12	4	1	321	33,985	6,14	High	High	High	High	High	High	High	High	High	High	High	High	High	High	High	High	High	High	High	High		283871	ENSG00000184207.8	PGP	16	metabolic process;regulation of biological process	cytosol	catalytic activity;metal ion binding	Pf00702, Pf13242, Pf13344, Pf13419	0,531	-0,91	69,4	130,6	14,13
FALSK	High	Master Protein	Q02252	Methylmalonate-semialdehyde dehydrogenase [acylating], mitochondrial [OS=Homo sapiens]	FALSK	0	54,83975137	19,25233645	11	30	11	1	535	57,803	8,5	High	High	High	High	High	High	High	High	High	High	High	High	High	High	High	High	High	High	High	High		4329	ENSG00000119711.12	ALDH6A1	14	cell differentiation;metabolic process	mitochondrion;organelle lumen	catalytic activity;RNA binding	Pf00171	0,532	-0,91	69,4	130,6	18,68
FALSK	High	Master Protein	P80220	TSC22 domain family protein 3 [OS=Sus scrofa]	FALSK	0,000396275	6,500854969	41,55844156	2	4	2	1	77	8,707	4,63	High	High	High	High	High	High	High	High	High	High	High	High	High	High	High	High	High	High	High	High		100517321	ENSSSCG00000030241.1	TSC22D3	X	regulation of biological process	cytoplasm;nucleus		Pf01166	0,533	-0,91	69,6	130,4	15,33
FALSK	High	Master Protein	Q9H2U2-2	Isoform 2 of Inorganic pyrophosphatase 2, mitochondrial [OS=Homo sapiens]	FALSK	0,000396275	6,159574829	4,871060172	2	15	1	1	349	39,613	6,92	High	High	High	High	High	High	High	High	High	High	High	High	High	High	High	High	High	High	High	High						metabolic process	cytoplasm	catalytic activity;metal ion binding	Pf00719	0,534	-0,91	69,6	130,4	14,66
FALSK	High	Master Protein	P62745	Rho-related GTP-binding protein RhoB [OS=Homo sapiens]	FALSK	0	36,31726796	44,3877551	6	19	4	1	196	22,109	5,24	High	High	High	High	High	High	High	High	High	High	High	High	High	High	High	High	High	High	High	High		388	ENSG00000143878.9	RHOB	2	cell death;cell differentiation;development;regulation of biological process;response to stimulus;transport	cytosol;endosome;membrane;nucleus	catalytic activity;nucleotide binding;protein binding	Pf00025, Pf00071, Pf08477	0,534	-0,91	69,6	130,4	11,53
FALSK	High	Master Protein	Q9Y3R0	Glutamate receptor-interacting protein 1 [OS=Homo sapiens]	FALSK	0	9,432435892	4,166666667	4	5	4	1	1128	122,346	6,47	High	High	High	High	High	Not Found	Not Found	Not Found	Not Found	Not Found	High	High	High	High	High	Not Found	Not Found	Not Found	Not Found	Not Found		23426	ENSG00000155974.11	GRIP1	12	cell organization and biogenesis;regulation of biological process;response to stimulus	cytosol;endoplasmic reticulum;endosome;membrane	protein binding;structural molecule activity	Pf00595, Pf13180, Pf14685	0,534	-0,9	69,6	130,4	14,56
FALSK	High	Master Protein	O75145-1	Liprin-alpha-3 [OS=Homo sapiens]	FALSK	0	29,70999886	9,212730318	9	14	7	1	1194	133,414	5,68	High	High	High	High	High	High	High	High	High	High	High	High	High	High	High	High	High	High	High	High		8541	ENSG00000177380.13	PPFIA3	19	cellular component movement;regulation of biological process;transport	cell surface;cytoplasm;cytosol	protein binding	Pf00536, Pf04156, Pf07647, Pf12128, Pf13851	0,534	-0,9	69,6	130,4	7,92
FALSK	High	Master Protein	Q9Y3B7-1	39S ribosomal protein L11, mitochondrial [OS=Homo sapiens]	FALSK	0,000112082	7,028547407	10,41666667	2	4	2	1	192	20,67	9,91	High	High	High	High	High	High	High	High	High	High	High	High	High	High	High	High	High	High	High	High		65003	ENSG00000174547.13	MRPL11	11	cell organization and biogenesis;metabolic process	membrane;mitochondrion;ribosome	protein binding;RNA binding;structural molecule activity	Pf00298, Pf03946	0,534	-0,9	69,7	130,3	14,87
FALSK	High	Master Protein	P36776	Lon protease homolog, mitochondrial [OS=Homo sapiens]	FALSK	0	61,99215529	19,39520334	13	33	13	1	959	106,422	6,39	High	High	High	High	High	High	High	High	High	High	High	High	High	High	High	High	High	High	High	High		9361	ENSG00000196365.11	LONP1	19	cell organization and biogenesis;metabolic process;regulation of biological process;response to stimulus	cytoplasm;membrane;mitochondrion;nucleus;organelle lumen	catalytic activity;DNA binding;nucleotide binding;protein binding;RNA binding	Pf00004, Pf00910, Pf01695, Pf02190, Pf05362, Pf05496, Pf07724, Pf07728, Pf08298, Pf13173, Pf13191, Pf13207, Pf13401, Pf13541	0,536	-0,9	69,8	130,2	5,85
FALSK	High	Master Protein	A5PKW4	PH and SEC7 domain-containing protein 1 [OS=Homo sapiens]	FALSK	0,000396275	4,995823473	1,953125	2	3	2	1	1024	109,475	6,87	High	High	High	High	High	High	High	High	High	High	High	High	High	High	High	High	High	High	High	High		5662	ENSG00000059915.16	PSD	10	cell differentiation;regulation of biological process;response to stimulus	membrane	protein binding;signal transducer activity	Pf00169, Pf01369, Pf15410	0,536	-0,9	69,8	130,2	32,1
FALSK	High	Master Protein	O75582-1	Ribosomal protein S6 kinase alpha-5 [OS=Homo sapiens]	FALSK	0	40,60427699	15,46134663	11	26	11	1	802	89,809	7,11	High	High	High	High	High	High	High	High	High	High	High	High	High	High	High	High	High	High	High	High		9252	ENSG00000100784.10	RPS6KA5	14	cell organization and biogenesis;cellular component movement;defense response;metabolic process;regulation of biological process;response to stimulus	cytoplasm;membrane;nucleus	catalytic activity;metal ion binding;nucleotide binding;protein binding	Pf00069, Pf00433, Pf01636, Pf06293, Pf07714, Pf14531	0,537	-0,9	69,9	130,1	13,62
FALSK	High	Master Protein	Q7L592	Protein arginine methyltransferase NDUFAF7, mitochondrial [OS=Homo sapiens]	FALSK	0,000396275	6,408588096	5,89569161	2	3	2	1	441	49,206	8,34	High	High	High	High	High	High	High	High	High	High	High	High	High	High	High	High	High	High	High	High		55471	ENSG00000003509.15	NDUFAF7	2	cell organization and biogenesis;metabolic process	mitochondrion;organelle lumen	catalytic activity;protein binding	Pf02636	0,538	-0,9	69,9	130,1	15,42
FALSK	High	Master Protein	Q92990	Glomulin [OS=Homo sapiens]	FALSK	0	24,317969	12,45791246	7	18	7	1	594	68,165	5,33	High	High	High	High	High	High	High	High	High	High	High	High	High	High	High	High	High	High	High	High		11146	ENSG00000174842.16	GLMN	1	cell differentiation;regulation of biological process	cytoplasm	enzyme regulator activity;protein binding	Pf08568	0,539	-0,89	70,1	129,9	13,54
FALSK	High	Master Protein	Q01968-1	Inositol polyphosphate 5-phosphatase OCRL-1 [OS=Homo sapiens]	FALSK	0	9,371363555	3,662597114	3	4	3	1	901	104,138	6,55	High	High	High	High	High	High	High	High	High	High	High	High	High	High	High	High	High	High	High	High		4952	ENSG00000122126.15	OCRL	X	cell organization and biogenesis;metabolic process;regulation of biological process;response to stimulus	cytoplasm;cytosol;endosome;Golgi;membrane;nucleus	catalytic activity;enzyme regulator activity;protein binding	Pf00620, Pf03372	0,539	-0,89	70,1	129,9	13,42
FALSK	High	Master Protein	Q8IUC4	Rhophilin-2 [OS=Homo sapiens]	FALSK	0	18,68832678	9,037900875	5	10	2	1	686	76,944	6,8	High	High	High	High	High	High	High	High	High	High	High	High	High	High	High	High	High	High	High	High		85415	ENSG00000131941.7	RHPN2	19	regulation of biological process;response to stimulus	cytoplasm;cytosol	protein binding	Pf02185, Pf03097	0,54	-0,89	70,1	129,9	10,39
FALSK	High	Master Protein	Q9BX68	Histidine triad nucleotide-binding protein 2, mitochondrial [OS=Homo sapiens]	FALSK	0	25,20149682	31,90184049	3	6	3	1	163	17,151	9,16	High	High	High	High	High	High	High	High	High	High	High	High	High	High	High	High	High	High	High	High		84681	ENSG00000137133.10	HINT2	9	cell death;metabolic process	mitochondrion	catalytic activity;nucleotide binding	Pf01230, Pf11969	0,54	-0,89	70,2	129,8	7,86
FALSK	High	Master Protein	Q9NVE7	pantothenate kinase 4 [OS=Homo sapiens]	FALSK	0	33,05431058	12,54851229	8	17	8	1	773	85,937	6,28	High	High	High	High	High	High	High	High	High	High	High	High	High	High	High	High	High	High	High	High		55229	ENSG00000273494.3	PANK4	1; CHR_HSCHR1_1_CTG3	metabolic process	cytoplasm	catalytic activity;nucleotide binding	Pf01937, Pf03630	0,541	-0,89	70,2	129,8	7,44
FALSK	High	Master Protein	Q9Y4I1-1	Unconventional myosin-Va [OS=Homo sapiens]	FALSK	0	157,0836602	24,47439353	40	89	37	1	1855	215,269	8,48	High	High	High	High	High	High	High	High	High	High	High	High	High	High	High	High	High	High	High	High		4644	ENSG00000197535.14	MYO5A	15	cell communication;cell differentiation;cell organization and biogenesis;cellular component movement;metabolic process;regulation of biological process;response to stimulus;transport	cytoplasm;cytoskeleton;cytosol;endoplasmic reticulum;endosome;extracellular;Golgi;membrane;vacuole	catalytic activity;metal ion binding;motor activity;nucleotide binding;protein binding;RNA binding	Pf00063, Pf00612, Pf00769, Pf01442, Pf01576, Pf01843, Pf02463, Pf04111, Pf04156, Pf05262, Pf05557, Pf06160, Pf07888, Pf07926, Pf09726, Pf09731, Pf10174, Pf12128, Pf12718, Pf13851, Pf14992, Pf15035, Pf15070	0,541	-0,89	70,2	129,8	9,96
FALSK	High	Master Protein	P82909	28S ribosomal protein S36, mitochondrial [OS=Homo sapiens]	FALSK	0	8,314633797	24,27184466	2	7	2	1	103	11,459	9,99	High	High	High	High	High	High	High	High	High	High	High	High	High	High	High	High	High	High	High	High		92259	ENSG00000278461.4; ENSG00000134056.11	MRPS36	5; CHR_HSCHR5_2_CTG1_1	cell organization and biogenesis;metabolic process	membrane;mitochondrion;ribosome	catalytic activity;structural molecule activity		0,541	-0,89	70,2	129,8	11,53
FALSK	High	Master Protein	Q3ZCQ8-2	Isoform 2 of Mitochondrial import inner membrane translocase subunit TIM50 [OS=Homo sapiens]	FALSK	0,000112082	7,215619173	5,043859649	2	3	2	1	456	50,433	9,42	High	High	High	High	High	High	High	High	High	High	High	High	High	High	High	High	High	High	High	High		92609	ENSG00000105197.10	TIMM50	19	cell organization and biogenesis;metabolic process;transport	membrane;mitochondrion	catalytic activity;protein binding;RNA binding	Pf03031	0,542	-0,88	70,3	129,7	20,5
FALSK	High	Master Protein	Q969Q5	Ras-related protein Rab-24 [OS=Homo sapiens]	FALSK	0	11,76905762	17,73399015	3	6	3	1	203	23,109	6,23	High	High	High	High	High	High	High	High	High	High	High	High	High	High	High	High	High	High	High	High		53917	ENSG00000169228.13	RAB24	5	metabolic process;regulation of biological process;response to stimulus;transport	cytoplasm;cytosol;membrane;mitochondrion;vacuole	nucleotide binding;protein binding	Pf00025, Pf00071, Pf08477	0,542	-0,88	70,3	129,7	11,99
FALSK	High	Master Protein	Q5FZP5	Secretogranin-2 [OS=Sus scrofa]	FALSK	0	54,43329263	28,57142857	15	42	15	1	616	70,955	4,75	High	High	High	High	High	High	High	High	High	High	High	High	High	High	High	High	High	High	High	High		497237		SCG2			extracellular		Pf01271	0,545	-0,87	70,6	129,4	13,61
FALSK	High	Master Protein	Q8N4V2	Synaptic vesicle 2-related protein [OS=Homo sapiens]	FALSK	0	9,774500541	5,656934307	3	6	3	1	548	60,729	5,78	High	High	High	High	High	High	High	High	High	High	High	High	High	High	High	High	High	High	High	High	Acetyl [N-Term]	55530	ENSG00000166111.9	SVOP	12	transport	membrane	transporter activity	Pf00083, Pf07690, Pf13347	0,546	-0,87	70,6	129,4	15,56
FALSK	High	Master Protein	Q14241	Transcription elongation factor B polypeptide 3 [OS=Homo sapiens]	FALSK	0	8,056313161	3,383458647	2	5	2	1	798	89,853	9,57	High	High	High	High	High	High	Not Found	Not Found	High	Not Found	High	High	High	High	High	High	Not Found	High	High	Not Found		6924	ENSG00000011007.12	TCEB3	1	metabolic process;regulation of biological process	nucleus	DNA binding;protein binding	Pf06881, Pf08711	0,546	-0,87	70,7	129,3	19,7
FALSK	High	Master Protein	Q14CZ8-1	Hepatocyte cell adhesion molecule [OS=Homo sapiens]	FALSK	0	10,27082657	10,09615385	2	3	2	1	416	45,998	9,11	High	High	High	High	High	High	High	Not Found	Not Found	Not Found	High	High	High	High	High	High	High	High	High	Not Found		220296	ENSG00000165478.6	HEPACAM	11	regulation of biological process	cytoplasm;membrane	protein binding	Pf00047, Pf07679, Pf07686, Pf13895, Pf13927	0,547	-0,87	70,7	129,3	22,59
FALSK	High	Master Protein	Q96P16-1	Regulation of nuclear pre-mRNA domain-containing protein 1A [OS=Homo sapiens]	FALSK	0	16,07043289	13,14102564	3	5	3	1	312	35,698	7,55	High	High	High	High	High	High	High	High	High	High	High	High	High	High	High	High	High	High	High	High		55197	ENSG00000141425.17	RPRD1A	18	metabolic process;regulation of biological process		protein binding	Pf04818	0,547	-0,87	70,7	129,3	13,69
FALSK	High	Master Protein	Q8IXI2-3	Isoform 3 of Mitochondrial Rho GTPase 1 [OS=Homo sapiens]	FALSK	0	55,12391898	30,82489146	14	37	1	1	691	79,496	6,9	High	High	High	High	High	High	High	High	High	High	High	High	High	High	High	High	High	High	High	High		55288	ENSG00000126858.16	RHOT1	17	cell organization and biogenesis;cellular component movement;cellular homeostasis;regulation of biological process;response to stimulus;transport	cytosol;membrane;mitochondrion	catalytic activity;metal ion binding;nucleotide binding;protein binding	Pf00071, Pf08355, Pf08356, Pf08477	0,547	-0,87	70,8	129,2	5,05
FALSK	High	Master Protein	Q96RP9-2	Isoform 2 of Elongation factor G, mitochondrial [OS=Homo sapiens]	FALSK	0	10,30189348	4,155844156	3	4	3	1	770	85,815	7,18	High	High	High	High	High	High	High	High	High	High	High	High	High	High	High	High	High	High	High	High		85476	ENSG00000168827.14	GFM1	3	metabolic process	mitochondrion;organelle lumen	catalytic activity;nucleotide binding;protein binding;RNA binding	Pf00009, Pf00679, Pf03144, Pf03764, Pf14492	0,548	-0,87	70,8	129,2	23,98
FALSK	High	Master Protein	Q9H1Z4	WD repeat-containing protein 13 [OS=Homo sapiens]	FALSK	0	11,95149427	9,484536082	4	8	4	1	485	53,662	9,14	High	High	High	High	High	High	High	High	High	High	High	High	High	High	High	High	High	High	High	High		64743		WDR13	X		cytoplasm;nucleus	protein binding	Pf00400	0,548	-0,87	70,8	129,2	9,51
FALSK	High	Master Protein	O14926-2	Isoform 2 of Fascin-2 [OS=Homo sapiens]	FALSK	0	12,52233238	7,558139535	4	10	4	1	516	57,345	8,1	High	High	High	High	High	High	High	High	High	High	High	High	High	High	High	High	High	High	High	High		25794	ENSG00000186765.11	FSCN2	17	cell organization and biogenesis	cytoplasm;cytoskeleton	protein binding	Pf00167, Pf06268	0,549	-0,87	70,9	129,1	26,53
FALSK	High	Master Protein	O60741	Potassium/sodium hyperpolarization-activated cyclic nucleotide-gated channel 1 [OS=Homo sapiens]	FALSK	0	40,82736332	16,51685393	11	20	11	1	890	98,733	8,4	High	High	High	High	High	High	High	High	High	High	High	High	High	High	High	High	High	High	High	High		348980	ENSG00000164588.6	HCN1	5	regulation of biological process;response to stimulus;transport	membrane	nucleotide binding;protein binding;transporter activity	Pf00027, Pf00520, Pf08412	0,549	-0,86	70,9	129,1	9,72
FALSK	High	Master Protein	Q01484	Ankyrin-2 [OS=Homo sapiens]	FALSK	0	171,5472164	13,79833207	35	93	30	1	3957	433,448	5,14	High	High	High	High	High	High	High	High	High	High	High	High	High	High	High	High	High	High	High	High		287	ENSG00000145362.17	ANK2	4	cell communication;cell organization and biogenesis;cellular homeostasis;regulation of biological process;response to stimulus;transport	cytoplasm;cytoskeleton;cytosol;membrane;nucleus	protein binding;structural molecule activity	Pf00023, Pf00531, Pf00791, Pf04621, Pf05109, Pf05539, Pf09726, Pf12737, Pf12796, Pf13606, Pf13637, Pf13857, Pf15279, Pf15427, Pf15440, Pf15449	0,55	-0,86	70,9	129,1	7,67
FALSK	High	Master Protein	P11216	Glycogen phosphorylase, brain form [OS=Homo sapiens]	FALSK	0	103,7474346	32,74021352	24	84	16	1	843	96,635	6,86	High	High	High	High	High	High	High	High	High	High	High	High	High	High	High	High	High	High	High	High		5834	ENSG00000100994.11	PYGB	20	metabolic process	cytoplasm;membrane	catalytic activity;protein binding	Pf00343	0,55	-0,86	70,9	129,1	7,15
FALSK	High	Master Protein	Q14642	Type I inositol 1,4,5-trisphosphate 5-phosphatase [OS=Homo sapiens]	FALSK	0,000112082	7,511110757	7,766990291	3	4	3	1	412	47,789	7,03	High	High	High	High	High	Not Found	Not Found	Not Found	Not Found	Not Found	High	High	High	High	High	High	Not Found	High	High	High		3632	ENSG00000068383.18	INPP5A	10	metabolic process;regulation of biological process;response to stimulus	membrane	catalytic activity;protein binding		0,55	-0,86	71	129	19,15
FALSK	High	Master Protein	Q8HZV3	Transferrin receptor protein 1 [OS=Sus scrofa]	FALSK	0	45,52766014	20,18229167	14	31	14	1	768	86,068	6,3	High	High	High	High	High	High	High	High	High	High	High	High	High	High	High	High	High	High	High	High		397062		TFRC	13	cellular homeostasis;metabolic process;regulation of biological process;transport	membrane	receptor activity;transporter activity	Pf02225, Pf04253, Pf04389	0,55	-0,86	71	129	11,12
FALSK	High	Master Protein	Q6PCB7	long-chain fatty acid transport protein 1 [OS=Homo sapiens]	FALSK	0	40,01109132	19,65944272	8	16	7	1	646	71,063	8,53	High	High	High	High	High	High	High	High	High	High	High	High	High	High	High	High	High	High	High	High		376497	ENSG00000130304.16	SLC27A1	19	metabolic process;regulation of biological process;response to stimulus;transport	cytoplasm;endoplasmic reticulum;membrane	catalytic activity;nucleotide binding;protein binding;transporter activity	Pf00501, Pf13193	0,551	-0,86	71	129	18,28
FALSK	High	Master Protein	P23763	Vesicle-associated membrane protein 1 [OS=Homo sapiens]	FALSK	0	13,19350184	19,49152542	2	4	1	1	118	12,894	6,65	High	High	High	High	High	High	High	High	High	High	High	High	High	High	High	High	High	High	High	High		6843	ENSG00000139190.16	VAMP1	12	cell organization and biogenesis;transport	cell surface;cytosol;membrane;mitochondrion	protein binding	Pf00957	0,551	-0,86	71	129	36,15
FALSK	High	Master Protein	Q08499-1	cAMP-specific 3',5'-cyclic phosphodiesterase 4D [OS=Homo sapiens]	FALSK	0	12,30989184	5,43881335	4	6	3	1	809	91,058	5,54	High	High	High	High	High	High	High	High	High	High	High	High	High	High	High	High	High	High	High	High		5144	ENSG00000113448.17	PDE4D	5	cellular component movement;metabolic process;regulation of biological process;response to stimulus	cytoplasm;cytoskeleton;cytosol;membrane	catalytic activity;metal ion binding;nucleotide binding;protein binding	Pf00233	0,551	-0,86	71,1	128,9	18,42
FALSK	High	Master Protein	Q12931	heat shock protein 75 kDa, mitochondrial [OS=Homo sapiens]	FALSK	0	26,36366932	8,806818182	6	65	5	1	704	80,06	8,21	High	High	High	High	High	High	High	High	High	High	High	High	High	High	High	High	High	High	High	High		10131	ENSG00000126602.10	TRAP1	16	metabolic process;regulation of biological process;response to stimulus	membrane;mitochondrion;organelle lumen	nucleotide binding;protein binding;RNA binding	Pf00183, Pf02518, Pf13589	0,551	-0,86	71,1	128,9	13,1
FALSK	High	Master Protein	P51608-2	Isoform B of Methyl-CpG-binding protein 2 [OS=Homo sapiens]	FALSK	0	63,57046834	29,31726908	13	47	13	1	498	53,291	9,88	High	High	High	High	High	High	High	High	High	High	High	High	High	High	High	High	High	High	High	High		4204	ENSG00000169057.20	MECP2	X	cell communication;cell differentiation;cell organization and biogenesis;defense response;metabolic process;regulation of biological process;response to stimulus;transport	cytoplasm;cytosol;mitochondrion;nucleus	DNA binding;nucleotide binding;protein binding;RNA binding	Pf01429	0,551	-0,86	71,1	128,9	13,55
FALSK	High	Master Protein	Q5TFE4	5'-nucleotidase domain-containing protein 1 [OS=Homo sapiens]	FALSK	0	12,90600293	5,274725275	2	6	2	1	455	51,812	6,35	High	High	High	High	High	High	High	High	High	High	High	High	High	High	High	High	High	High	High	High		221294	ENSG00000178425.13	NT5DC1	6	metabolic process		catalytic activity;metal ion binding;receptor activity;signal transducer activity	Pf05761	0,551	-0,86	71,1	128,9	14,03
FALSK	High	Master Protein	P13591-2	Neural cell adhesion molecule 1 [OS=Homo sapiens]	FALSK	0	94,26552155	22,84382284	16	107	2	1	858	94,515	4,87	High	High	High	High	High	High	High	High	High	High	High	High	High	High	High	High	High	High	High	High		4684	ENSG00000149294.16	NCAM1	11	cell organization and biogenesis;cellular component movement;metabolic process;regulation of biological process;response to stimulus	cell surface;cytoplasm;extracellular;membrane	protein binding;receptor activity	Pf00041, Pf00047, Pf07654, Pf07679, Pf08205, Pf13895, Pf13927	0,552	-0,86	71,2	128,8	12,85
FALSK	High	Master Protein	Q9NZN9-1	aryl-hydrocarbon-interacting protein-like 1 [OS=Homo sapiens]	FALSK	0	13,74781928	10,41666667	3	8	3	1	384	43,875	5,95	High	High	High	High	High	High	High	High	High	High	High	High	High	High	High	High	High	High	High	High	Acetyl [N-Term]	23746	ENSG00000129221.15	AIPL1	17	metabolic process;regulation of biological process;response to stimulus	cytoplasm;nucleus	protein binding	Pf00254	0,552	-0,86	71,2	128,8	12,08
FALSK	High	Master Protein	P35573-1	glycogen debranching enzyme [OS=Homo sapiens]	FALSK	0	76,20134114	14,94778068	21	59	21	1	1532	174,652	6,76	High	High	High	High	High	High	High	High	High	High	High	High	High	High	High	High	High	High	High	High		178	ENSG00000162688.16	AGL	1	metabolic process;response to stimulus	cytoplasm;cytosol;endoplasmic reticulum;nucleus	catalytic activity;protein binding	Pf06202, Pf14699, Pf14701, Pf14702	0,554	-0,85	71,3	128,7	11,75
FALSK	High	Master Protein	P23434	Glycine cleavage system H protein, mitochondrial [OS=Homo sapiens]	FALSK	0	10,3739844	17,34104046	2	10	2	1	173	18,873	4,88	High	High	High	High	High	High	High	High	High	High	High	High	High	High	High	High	High	High	High	High		2653	ENSG00000140905.9	GCSH	16	metabolic process	mitochondrion;organelle lumen	catalytic activity;protein binding	Pf01597	0,554	-0,85	71,3	128,7	13,07
FALSK	High	Master Protein	Q92753-2	Nuclear receptor ROR-beta [OS=Homo sapiens]	FALSK	0	16,59412007	12,55319149	5	10	5	1	470	53,186	7,65	High	High	High	High	High	High	High	High	High	High	High	High	High	High	High	High	High	High	High	High		6096	ENSG00000198963.10	RORB	9	cell differentiation;development;metabolic process;regulation of biological process;response to stimulus	nucleus	DNA binding;metal ion binding;protein binding;receptor activity;signal transducer activity	Pf00104, Pf00105	0,554	-0,85	71,3	128,7	8,16
FALSK	High	Master Protein	F1S584	Choline transporter-like protein 2 [OS=Sus scrofa]	FALSK	0	33,20385912	14,44759207	7	18	7	1	706	80,185	8,6	High	High	High	High	High	High	High	High	High	High	High	High	High	High	High	High	High	High	High	High		100524730	ENSSSCG00000013639.2	LOC100524730; SLC44A2	2	regulation of biological process;response to stimulus;transport	membrane	signal transducer activity	Pf04515	0,554	-0,85	71,3	128,7	19,5
FALSK	High	Master Protein	Q92604	Acyl-CoA:lysophosphatidylglycerol acyltransferase 1 [OS=Homo sapiens]	FALSK	0,000396275	6,265267359	5,945945946	2	3	2	1	370	43,061	8,92	High	High	High	High	High	High	High	High	High	High	High	High	High	High	High	High	High	High	High	High		9926	ENSG00000123684.12	LPGAT1	1	metabolic process	cytoplasm;endoplasmic reticulum;membrane	catalytic activity	Pf01553	0,555	-0,85	71,4	128,6	13,97
FALSK	High	Master Protein	Q58FG0	Putative heat shock protein HSP 90-alpha A5 [OS=Homo sapiens]	FALSK	0	41,16307019	15,86826347	6	84	1	1	334	38,714	6,57	High	High	High	High	High	High	High	High	High	High	High	High	High	High	High	High	High	High	High	High		730211		HSP90AA5P	3	metabolic process;response to stimulus	cytoplasm	nucleotide binding;protein binding	Pf00183	0,555	-0,85	71,4	128,6	71,54
FALSK	High	Master Protein	O43617-1	Trafficking protein particle complex subunit 3 [OS=Homo sapiens]	FALSK	0	24,24614477	27,22222222	5	12	5	1	180	20,261	4,96	High	High	High	High	High	High	High	High	High	High	High	High	High	High	High	High	High	High	High	High		27095	ENSG00000054116.11	TRAPPC3	1	cell organization and biogenesis;transport	cytoplasm;cytosol;endoplasmic reticulum;Golgi;membrane	protein binding	Pf04051	0,555	-0,85	71,4	128,6	5,51
FALSK	High	Master Protein	Q3ZCW2	Galectin-related protein [OS=Homo sapiens]	FALSK	0	21,22248172	30,81395349	4	22	4	1	172	18,974	5,35	High	High	High	High	High	High	High	High	High	High	High	High	High	High	High	High	High	High	High	High		29094	ENSG00000119862.12	LGALSL	2			protein binding	Pf00337	0,556	-0,85	71,4	128,6	13,14
FALSK	High	Master Protein	P00336	L-lactate dehydrogenase B chain [OS=Sus scrofa]	FALSK	0	162,5358428	68,26347305	19	299	18	1	334	36,589	5,86	High	High	High	High	High	High	High	High	High	High	High	High	High	High	High	High	High	High	High	High		100621540		LDHB	2	metabolic process	cytoplasm	catalytic activity	Pf00056, Pf02866	0,556	-0,85	71,4	128,6	13,56
FALSK	High	Master Protein	Q6KCM7-3	Isoform 3 of Calcium-binding mitochondrial carrier protein SCaMC-2 [OS=Homo sapiens]	FALSK	0	14,33363336	7,766990291	4	7	4	1	515	56,846	8,46	High	High	High	High	High	High	High	High	High	High	High	High	High	High	High	High	High	High	High	High		114789	ENSG00000148339.12	SLC25A25	9	metabolic process;response to stimulus;transport	membrane;mitochondrion	metal ion binding;protein binding;structural molecule activity	Pf00036, Pf00153, Pf12763, Pf13405, Pf13499, Pf13833	0,556	-0,85	71,4	128,6	33,64
FALSK	High	Master Protein	P53677	AP-3 complex subunit mu-2 [OS=Homo sapiens]	FALSK	0	29,85555983	27,75119617	7	15	6	1	418	46,947	7,56	High	High	High	High	High	High	High	High	High	High	High	High	High	High	High	High	High	High	High	High		10947	ENSG00000070718.11	AP3M2	8	cellular component movement;transport	Golgi;membrane		Pf00928	0,556	-0,85	71,5	128,5	9,36
FALSK	High	Master Protein	O60331-3	Isoform 3 of Phosphatidylinositol 4-phosphate 5-kinase type-1 gamma [OS=Homo sapiens]	FALSK	0	22,46423026	5,516265912	3	6	3	1	707	77,436	5,82	High	High	High	High	High	High	High	High	High	High	High	High	High	High	High	High	High	High	High	High		23396	ENSG00000186111.9	PIP5K1C	19	cell organization and biogenesis;cellular component movement;metabolic process;regulation of biological process;response to stimulus;transport	cytosol;nucleus	catalytic activity;nucleotide binding;protein binding	Pf01504	0,557	-0,85	71,5	128,5	24,19
FALSK	High	Master Protein	P12277	Creatine kinase B-type [OS=Homo sapiens]	FALSK	0	150,1686539	43,04461942	10	451	10	1	381	42,617	5,59	High	High	High	High	High	High	High	High	High	High	High	High	High	High	High	High	High	High	High	High		1152	ENSG00000166165.12	CKB	14	cellular homeostasis;metabolic process	cytoplasm;cytosol;mitochondrion;nucleus	catalytic activity;nucleotide binding;protein binding	Pf00217, Pf02807	0,557	-0,84	71,6	128,4	7,08
FALSK	High	Master Protein	P53701	Cytochrome c-type heme lyase [OS=Homo sapiens]	FALSK	0	7,740334461	10,44776119	2	3	2	1	268	30,582	6,68	High	High	High	High	High	High	High	High	High	High	High	High	High	High	High	High	High	High	High	High		3052	ENSG00000004961.14	HCCS	X	cell organization and biogenesis;metabolic process	membrane;mitochondrion	catalytic activity;metal ion binding	Pf01265	0,557	-0,84	71,6	128,4	19,74
FALSK	High	Master Protein	Q9UMS0	NFU1 iron-sulfur cluster scaffold homolog, mitochondrial [OS=Homo sapiens]	FALSK	0	25,77973051	21,25984252	4	10	4	1	254	28,444	5,07	High	High	High	High	High	High	High	High	High	High	High	High	High	High	High	High	High	High	High	High		27247	ENSG00000169599.12	NFU1	2	cell organization and biogenesis;metabolic process	cytoplasm;cytosol;mitochondrion;nucleus	metal ion binding;protein binding	Pf01106, Pf08712	0,557	-0,84	71,6	128,4	9,86
FALSK	High	Master Protein	Q9ULB5	Cadherin-7 [OS=Homo sapiens]	FALSK	0	11,15958205	6,114649682	4	7	4	1	785	87,032	4,81	High	High	High	High	High	High	High	High	High	High	High	High	High	High	High	High	High	High	High	High		1005	ENSG00000081138.13	CDH7	18	cell organization and biogenesis	membrane	metal ion binding	Pf00028, Pf01049	0,557	-0,84	71,6	128,4	18,5
FALSK	High	Master Protein	Q9Y2J2	Band 4.1-like protein 3 [OS=Homo sapiens]	FALSK	0	126,2518167	25,94296228	23	102	16	1	1087	120,603	5,19	High	High	High	High	High	High	High	High	High	High	High	High	High	High	High	High	High	High	High	High		23136	ENSG00000082397.17	EPB41L3	18	cell death;cell organization and biogenesis;regulation of biological process	cytoplasm;cytoskeleton;membrane	protein binding;structural molecule activity	Pf00373, Pf04382, Pf05902, Pf08736, Pf09379, Pf09380	0,558	-0,84	71,6	128,4	5,92
FALSK	High	Master Protein	P78356	Phosphatidylinositol 5-phosphate 4-kinase type-2 beta [OS=Homo sapiens]	FALSK	0	36,61734872	21,63461538	7	26	5	1	416	47,348	7,33	High	High	High	High	High	High	High	High	High	High	High	High	High	High	High	High	High	High	High	High		8396	ENSG00000276293.4; ENSG00000277292.2	PIP4K2B	17; CHR_HSCHR17_7_CTG4	metabolic process;regulation of biological process;response to stimulus	cytoplasm;cytosol;endoplasmic reticulum;membrane;nucleus;vacuole	catalytic activity;nucleotide binding;protein binding;signal transducer activity	Pf01504	0,558	-0,84	71,6	128,4	7,11
FALSK	High	Master Protein	O43615	Mitochondrial import inner membrane translocase subunit TIM44 [OS=Homo sapiens]	FALSK	0	19,38894442	14,15929204	5	10	5	1	452	51,323	8,32	High	High	High	High	High	High	High	High	High	High	High	High	High	High	High	High	High	High	High	High		10469	ENSG00000104980.7	TIMM44	19	transport	membrane;mitochondrion;organelle lumen	nucleotide binding;protein binding	Pf04280, Pf07091	0,558	-0,84	71,6	128,4	10,36
FALSK	High	Master Protein	Q9Y6I3-1	Isoform 2 of Epsin-1 [OS=Homo sapiens]	FALSK	0	13,97995429	4,833836858	3	8	3	1	662	68,996	5,05	High	High	High	High	High	High	High	High	High	High	High	High	High	High	High	High	High	High	High	High		29924	ENSG00000063245.14	EPN1	19	regulation of biological process;response to stimulus;transport	cytoplasm;membrane;nucleus	protein binding	Pf01417	0,558	-0,84	71,6	128,4	8,44
FALSK	High	Master Protein	Q8NC96	adaptin ear-binding coat-associated protein 1 [OS=Homo sapiens]	FALSK	0	8,13622808	12,72727273	3	7	3	1	275	29,719	6,8	High	High	High	High	High	High	High	High	High	High	High	High	High	High	High	High	High	High	High	High		25977	ENSG00000089818.16	NECAP1	12	transport	membrane		Pf07933	0,558	-0,84	71,6	128,4	9,89
FALSK	High	Master Protein	Q9ULP0-6	Isoform 6 of Protein NDRG4 [OS=Homo sapiens]	FALSK	0	32,33697775	28,90025575	8	27	2	1	391	42,859	5,74	High	High	High	High	High	High	High	High	High	High	High	High	High	High	High	High	High	High	High	High		65009	ENSG00000103034.14	NDRG4	16	cell differentiation;cell growth;cell proliferation;cellular component movement;regulation of biological process;response to stimulus	cytoplasm;cytosol;membrane;mitochondrion	protein binding	Pf03096, Pf12697	0,558	-0,84	71,7	128,3	14,57
FALSK	High	Master Protein	P42263-1	Glutamate receptor 3 [OS=Homo sapiens]	FALSK	0	26,31844285	9,172259508	7	9	4	1	894	101,092	8,54	High	High	High	High	High	High	High	High	High	High	High	High	High	High	High	High	High	High	High	High		2892	ENSG00000125675.17	GRIA3	X	cell communication;regulation of biological process;response to stimulus;transport	membrane	receptor activity;signal transducer activity;transporter activity	Pf00060, Pf00497, Pf01094, Pf10613	0,559	-0,84	71,7	128,3	41,44
FALSK	High	Master Protein	O00429-6	Isoform 6 of Dynamin-1-like protein [OS=Homo sapiens]	FALSK	0	160,656047	55,54072096	30	87	30	1	749	83,347	7,08	High	High	High	High	High	High	High	High	High	High	High	High	High	High	High	High	High	High	High	High		10059	ENSG00000087470.17	DNM1L	12	cell death;cell organization and biogenesis;regulation of biological process;transport	cytoplasm;cytoskeleton;cytosol;Golgi;membrane;mitochondrion	catalytic activity;nucleotide binding;protein binding	Pf00350, Pf01031, Pf02212	0,56	-0,84	71,8	128,2	11,71
FALSK	High	Master Protein	Q08AD1	Calmodulin-regulated spectrin-associated protein 2 [OS=Homo sapiens]	FALSK	0	18,04876022	6,312961719	7	11	7	1	1489	167,984	6,8	High	High	High	High	High	High	High	High	High	High	High	High	High	High	High	High	High	High	High	High		23271	ENSG00000118200.14	CAMSAP2	1	cell organization and biogenesis;regulation of biological process	cytoplasm;cytoskeleton	protein binding	Pf00307, Pf08683, Pf11971	0,561	-0,83	71,9	128,1	8,02
FALSK	High	Master Protein	P26440	Isovaleryl-CoA dehydrogenase, mitochondrial [OS=Homo sapiens]	FALSK	0	25,91623671	12,52955083	5	16	5	1	423	46,29	8,19	High	High	High	High	High	High	High	High	High	High	High	High	High	High	High	High	High	High	High	High		3712		IVD	15	metabolic process	mitochondrion;organelle lumen	catalytic activity;nucleotide binding	Pf00441, Pf02770, Pf02771, Pf08028	0,561	-0,83	71,9	128,1	17,76
FALSK	High	Master Protein	P61604	10 kDa heat shock protein, mitochondrial [OS=Homo sapiens]	FALSK	0	36,30914162	65,68627451	8	47	8	1	102	10,925	8,92	High	High	High	High	High	High	High	High	High	High	High	High	High	High	High	High	High	High	High	High		3336	ENSG00000115541.10	HSPE1	2	cell differentiation;metabolic process;regulation of biological process;response to stimulus	cytoplasm;membrane;mitochondrion;organelle lumen	metal ion binding;nucleotide binding;protein binding;RNA binding	Pf00166	0,561	-0,83	71,9	128,1	11,1
FALSK	High	Master Protein	P10809	60 kDa heat shock protein, mitochondrial [OS=Homo sapiens]	FALSK	0	199,2021003	54,45026178	27	237	27	1	573	61,016	5,87	High	High	High	High	High	High	High	High	High	High	High	High	High	High	High	High	High	High	High	High		3329	ENSG00000144381.16	HSPD1	2	cell organization and biogenesis;cell proliferation;metabolic process;regulation of biological process;response to stimulus;transport	cell surface;cytoplasm;cytosol;endosome;membrane;mitochondrion;organelle lumen	catalytic activity;DNA binding;nucleotide binding;protein binding;RNA binding	Pf00118	0,562	-0,83	71,9	128,1	9,22
FALSK	High	Master Protein	Q9HCK4-3	Isoform 3 of Roundabout homolog 2 [OS=Homo sapiens]	FALSK	0,000396275	6,350218651	3,228120516	2	3	2	1	1394	153,025	6,67	High	High	High	High	High	High	High	High	High	High	High	High	High	High	High	High	High	High	High	High		6092	ENSG00000185008.17	ROBO2	3	cell death;cellular component movement;regulation of biological process;response to stimulus	cell surface	protein binding;receptor activity;signal transducer activity	Pf00041, Pf00047, Pf07679, Pf07686, Pf13895, Pf13927	0,562	-0,83	71,9	128,1	29,21
FALSK	High	Master Protein	Q16281-3	Isoform 3 of Cyclic nucleotide-gated cation channel alpha-3 [OS=Homo sapiens]	FALSK	0	14,88023575	7,163323782	4	10	2	1	698	79,013	7,59	High	High	High	High	High	Not Found	Not Found	High	High	High	High	High	High	High	High	High	High	High	High	High			ENSG00000144191.11		2	transport	membrane	transporter activity	Pf00027, Pf00520	0,562	-0,83	72	128	14,74
FALSK	High	Master Protein	Q9UJC3	Protein Hook homolog 1 [OS=Homo sapiens]	FALSK	0	28,11554545	14,56043956	9	14	9	1	728	84,595	5,15	High	High	High	High	High	High	High	High	High	High	High	High	High	High	High	High	High	High	High	High		51361	ENSG00000134709.10	HOOK1	1	cell differentiation;cell organization and biogenesis;development;transport	cytoplasm;cytoskeleton;cytosol	protein binding	Pf04156, Pf05622	0,562	-0,83	72	128	8,07
FALSK	High	Master Protein	P42174	Glutamate dehydrogenase 1, mitochondrial [OS=Sus scrofa]	FALSK	0,000396275	5,546852506	45,45454545	2	10	1	1	33	3,621	3,94	High	High	High	High	High	High	High	High	High	High	High	High	High	High	High	High	High	High	High	High		100157162		GLUD1	14	metabolic process	membrane;mitochondrion	catalytic activity		0,563	-0,83	72	128	22,19
FALSK	High	Master Protein	O43390-2	Isoform 2 of Heterogeneous nuclear ribonucleoprotein R [OS=Homo sapiens]	FALSK	0	136,3413769	44,02515723	25	111	1	1	636	71,17	8,13	High	High	High	High	High	High	High	High	High	High	High	High	High	High	High	High	High	High	High	High		10236	ENSG00000282958.1; ENSG00000125944.18	HNRNPR	1; CHR_HSCHR1_4_CTG3	metabolic process;regulation of biological process	endoplasmic reticulum;spliceosomal complex	nucleotide binding;protein binding;RNA binding	Pf00076, Pf13893, Pf14259	0,563	-0,83	72	128	17,9
FALSK	High	Master Protein	P60880	Synaptosomal-associated protein 25 [OS=Homo sapiens]	FALSK	0	69,35993284	65,04854369	12	58	4	1	206	23,3	4,77	High	High	High	High	High	High	High	High	High	High	High	High	High	High	High	High	High	High	High	High		6616	ENSG00000132639.12	SNAP25	20	cell communication;cell organization and biogenesis;metabolic process;regulation of biological process;response to stimulus;transport	cytoplasm;cytosol;extracellular;membrane	catalytic activity;metal ion binding;protein binding	Pf00835, Pf05739	0,563	-0,83	72,1	127,9	15,43
FALSK	High	Master Protein	Q92598	Heat shock protein 105 kDa [OS=Homo sapiens]	FALSK	0	81,02866314	25,29137529	17	43	14	1	858	96,804	5,39	High	High	High	High	High	High	High	High	High	High	High	High	High	High	High	High	High	High	High	High		10808	ENSG00000120694.19	HSPH1	13	metabolic process;regulation of biological process;response to stimulus;transport	cytoplasm;cytosol;extracellular;nucleus;organelle lumen	enzyme regulator activity;nucleotide binding;protein binding	Pf00012	0,564	-0,83	72,1	127,9	10,12
FALSK	High	Master Protein	P61981	14-3-3 protein gamma [OS=Homo sapiens]	FALSK	0	103,7839701	69,63562753	13	155	9	1	247	28,285	4,89	High	High	High	High	High	High	High	High	High	High	High	High	High	High	High	High	High	High	High	High		7532	ENSG00000170027.6	YWHAG	7	cell organization and biogenesis;regulation of biological process;response to stimulus;transport	cytoplasm;cytosol;membrane;mitochondrion	enzyme regulator activity;protein binding;RNA binding	Pf00244	0,564	-0,83	72,1	127,9	9,6
FALSK	High	Master Protein	Q9H0R4-1	haloacid dehalogenase-like hydrolase domain-containing protein 2 [OS=Homo sapiens]	FALSK	0	14,72820424	14,28571429	4	12	4	1	259	28,518	6,24	High	High	High	High	High	High	High	High	High	High	High	High	High	High	High	High	High	High	High	High		84064	ENSG00000167220.11	HDHD2	18	metabolic process		catalytic activity;metal ion binding;protein binding	Pf00702, Pf13242, Pf13344, Pf13419	0,564	-0,82	72,2	127,8	11,88
FALSK	High	Master Protein	Q96PM9	Zinc finger protein 385A [OS=Homo sapiens]	FALSK	0	27,34599746	27,97927461	8	19	8	1	386	40,428	9,86	High	High	High	High	High	High	High	High	High	High	High	High	High	High	High	High	High	High	High	High		25946	ENSG00000161642.17	ZNF385A	12	cell death;cell differentiation;cell organization and biogenesis;metabolic process;regulation of biological process;response to stimulus	cytoplasm;nucleus	DNA binding;metal ion binding;protein binding;RNA binding	Pf07535, Pf12171, Pf12874	0,565	-0,82	72,2	127,8	10,82
FALSK	High	Master Protein	Q9NVH1-1	DnaJ homolog subfamily C member 11 [OS=Homo sapiens]	FALSK	0	36,90702963	21,10912343	9	18	9	1	559	63,239	8,4	High	High	High	High	High	High	High	High	High	High	High	High	High	High	High	High	High	High	High	High		55735	ENSG00000007923.15	DNAJC11	1		membrane;mitochondrion	protein binding	Pf00226, Pf11875	0,565	-0,82	72,2	127,8	12
FALSK	High	Master Protein	Q96GK7	fumarylacetoacetate hydrolase domain-containing protein 2A [OS=Homo sapiens]	FALSK	0	27,54914866	13,05732484	4	17	4	1	314	34,574	8,24	High	High	High	High	High	High	High	High	High	High	High	High	High	High	High	High	High	High	High	High		51011	ENSG00000115042.9	FAHD2A	2	metabolic process		catalytic activity;metal ion binding	Pf01557	0,565	-0,82	72,2	127,8	19,19
FALSK	High	Master Protein	Q99623	Prohibitin-2 [OS=Homo sapiens]	FALSK	0	48,60685205	43,81270903	12	39	12	1	299	33,276	9,83	High	High	High	High	High	High	High	High	High	High	High	High	High	High	High	High	High	High	High	High		11331	ENSG00000215021.8	PHB2	12	cell organization and biogenesis;metabolic process;regulation of biological process;transport	cell surface;cytoplasm;membrane;mitochondrion;nucleus	protein binding	Pf01145	0,566	-0,82	72,3	127,7	4,58
FALSK	High	Master Protein	Q8WW22-2	Isoform 2 of DnaJ homolog subfamily A member 4 [OS=Homo sapiens]	FALSK	0	25,09644937	18,07511737	5	12	5	1	426	47,932	7,77	High	High	High	High	High	High	High	High	High	High	High	High	High	High	High	High	High	High	High	High		55466	ENSG00000140403.12	DNAJA4	15	metabolic process;regulation of biological process;response to stimulus	cytosol;membrane	metal ion binding;nucleotide binding;protein binding	Pf00226, Pf00684, Pf01556	0,567	-0,82	72,4	127,6	10,95
FALSK	High	Master Protein	P25686-3	DnaJ homolog subfamily B member 2 [OS=Homo sapiens]	FALSK	0	20,71576633	14,50617284	4	14	3	1	324	35,558	5,95	High	High	High	High	High	High	High	High	High	High	High	High	High	High	High	High	High	High	High	High		3300	ENSG00000135924.15	DNAJB2	2	metabolic process;regulation of biological process;response to stimulus	cytoplasm;cytosol;nucleus;proteasome	enzyme regulator activity;protein binding	Pf00226	0,568	-0,82	72,4	127,6	9,08
FALSK	High	Master Protein	Q864R5	Mitochondrial Rho GTPase 2 [OS=Sus scrofa]	FALSK	0	18,63062537	7,903225806	4	12	2	1	620	67,577	6,49	High	High	High	High	High	High	High	High	High	High	High	High	High	High	High	High	High	High	High	High		397596		RHOT2	3	cell organization and biogenesis;cellular component movement;cellular homeostasis;regulation of biological process;response to stimulus;transport	membrane;mitochondrion	catalytic activity;metal ion binding;nucleotide binding	Pf00071, Pf01926, Pf08356, Pf08477	0,569	-0,81	72,5	127,5	15,27
FALSK	High	Master Protein	Q9UIJ7-1	GTP:AMP phosphotransferase AK3, mitochondrial [OS=Homo sapiens]	FALSK	0	21,17004818	15,85903084	3	8	3	1	227	25,55	9,16	High	High	High	High	High	High	High	High	High	High	High	High	High	High	High	High	High	High	High	High		50808	ENSG00000147853.16	AK3	9	coagulation;metabolic process	mitochondrion;organelle lumen	catalytic activity;nucleotide binding;protein binding	Pf00406, Pf05191, Pf13207, Pf13238, Pf13671	0,572	-0,81	72,8	127,2	16,71
FALSK	High	Master Protein	Q13885	Tubulin beta-2A chain [OS=Homo sapiens]	FALSK	0	298,7185472	74,60674157	26	558	2	1	445	49,875	4,89	High	High	High	High	High	High	High	High	High	High	High	High	High	High	High	High	High	High	High	High		7280	ENSG00000137267.5	TUBB2A	6	cell organization and biogenesis	cytoplasm;cytoskeleton;nucleus	catalytic activity;nucleotide binding;protein binding;structural molecule activity	Pf00091, Pf03953, Pf10644	0,572	-0,81	72,8	127,2	15
FALSK	High	Master Protein	Q9NRZ7-3	Isoform 3 of 1-acyl-sn-glycerol-3-phosphate acyltransferase gamma [OS=Homo sapiens]	FALSK	0	31,24429371	17,92929293	8	32	8	1	396	45,484	8,68	High	High	High	High	High	High	High	High	High	High	High	High	High	High	High	High	High	High	High	High						metabolic process		catalytic activity	Pf01553	0,572	-0,81	72,8	127,2	7,16
FALSK	High	Master Protein	O75475-1	PC4 and SFRS1-interacting protein [OS=Homo sapiens]	FALSK	0	64,40944314	29,43396226	13	53	12	1	530	60,067	9,13	High	High	High	High	High	High	High	High	High	High	High	High	High	High	High	High	High	High	High	High		11168	ENSG00000164985.14	PSIP1	9	cell organization and biogenesis;metabolic process;regulation of biological process;response to stimulus;transport	cytosol;nucleus	DNA binding;metal ion binding;protein binding;RNA binding	Pf00855, Pf11467	0,573	-0,8	72,8	127,2	12,06
FALSK	High	Master Protein	Q9BTV5	fibronectin type III and SPRY domain-containing protein 1 [OS=Homo sapiens]	FALSK	0	10,91920282	5,040322581	2	3	2	1	496	55,784	6,99	High	High	High	High	High	High	High	High	High	High	High	High	High	High	High	High	High	High	High	High		79187	ENSG00000105255.10	FSD1	19	cell division;cell organization and biogenesis	cytoplasm;cytoskeleton;nucleus	protein binding	Pf00041, Pf00622	0,573	-0,8	72,8	127,2	10,26
FALSK	High	Master Protein	Q9BY12	S phase cyclin A-associated protein in the endoplasmic reticulum [OS=Homo sapiens]	FALSK	0,000396275	4,921385987	1,785714286	2	4	2	1	1400	158,188	7,44	High	High	High	High	High	Not Found	Not Found	Not Found	Not Found	Not Found	High	High	High	High	High	High	Not Found	Not Found	Not Found	Not Found		49855	ENSG00000140386.12	SCAPER	15		cytoplasm;endoplasmic reticulum;nucleus	metal ion binding	Pf12874	0,574	-0,8	72,9	127,1	11,56
FALSK	High	Master Protein	Q9UHQ9	NADH-cytochrome b5 reductase 1 [OS=Homo sapiens]	FALSK	0	9,635432136	12,45901639	3	9	3	1	305	34,073	9,38	High	High	High	High	High	High	High	High	High	High	High	High	High	High	High	High	High	High	High	High		51706	ENSG00000159348.12	CYB5R1	1	metabolic process;transport	membrane;mitochondrion	catalytic activity;nucleotide binding;protein binding	Pf00175, Pf00970	0,574	-0,8	73	127	8,29
FALSK	High	Master Protein	Q14919-2	Isoform 2 of Dr1-associated corepressor [OS=Homo sapiens]	FALSK	0	14,18319239	25,59241706	4	9	4	1	211	23,133	5,27	High	High	High	High	High	High	High	High	High	High	High	High	High	High	High	High	High	High	High	High								DNA binding	Pf00125, Pf00808	0,574	-0,8	73	127	11,75
FALSK	High	Master Protein	Q03252	Lamin-B2 [OS=Homo sapiens]	FALSK	0	50,56885232	19,51612903	13	66	11	1	620	69,906	5,59	High	High	High	High	High	High	High	High	High	High	High	High	High	High	High	High	High	High	High	High		84823	ENSG00000176619.11	LMNB2	19		membrane;nucleus	catalytic activity;motor activity;structural molecule activity	Pf00038, Pf00932, Pf01576, Pf12128	0,575	-0,8	73	127	11,5
FALSK	High	Master Protein	P05383	cAMP-dependent protein kinase catalytic subunit beta [OS=Sus scrofa]	FALSK	0	43,25357517	49,28774929	12	39	3	1	351	40,568	8,7	High	High	High	High	High	High	High	High	High	High	High	High	High	High	High	High	High	High	High	High		397494		PRKACB	6	metabolic process	cytoplasm;membrane;nucleus	catalytic activity;metal ion binding;nucleotide binding	Pf00069, Pf07714, Pf14531	0,576	-0,8	73,1	126,9	19,11
FALSK	High	Master Protein	Q9NYB9	abl interactor 2 [OS=Homo sapiens]	FALSK	0	13,0197604	8,576998051	4	8	2	1	513	55,629	6,16	High	High	High	High	High	Not Found	Not Found	Not Found	Not Found	Not Found	High	High	High	High	High	Not Found	Not Found	Not Found	Not Found	Not Found		10152		ABI2	2	cell organization and biogenesis;cellular component movement;metabolic process;regulation of biological process;response to stimulus	cytoplasm;cytoskeleton;cytosol	DNA binding;protein binding	Pf00018, Pf07653, Pf07815, Pf14604	0,576	-0,8	73,1	126,9	35,5
FALSK	High	Master Protein	Q8TC12	Retinol dehydrogenase 11 [OS=Homo sapiens]	FALSK	0	8,134018719	12,57861635	4	6	3	1	318	35,363	8,82	High	High	High	High	High	High	High	High	High	High	High	High	High	High	High	High	High	High	High	High		51109	ENSG00000072042.12	RDH11	14	metabolic process;regulation of biological process	endoplasmic reticulum;membrane	catalytic activity	Pf00106, Pf00670, Pf08659, Pf13460	0,576	-0,8	73,1	126,9	15,98
FALSK	High	Master Protein	P20962	Parathymosin [OS=Homo sapiens]	FALSK	0	14,39498386	22,54901961	3	22	3	1	102	11,523	4,16	High	High	High	High	High	High	High	High	High	High	High	High	High	High	High	High	High	High	High	High		5763	ENSG00000159335.15	PTMS	12	metabolic process	cytosol;nucleus	metal ion binding		0,576	-0,8	73,1	126,9	15,09
FALSK	High	Master Protein	O94805	Actin-like protein 6B [OS=Homo sapiens]	FALSK	0	17,41162905	15,72769953	5	11	3	1	426	46,847	5,71	High	High	High	High	High	High	High	High	High	High	High	High	High	High	High	High	High	High	High	High		51412	ENSG00000077080.9	ACTL6B	7	cell organization and biogenesis;metabolic process;regulation of biological process	nucleus	structural molecule activity	Pf00022	0,577	-0,79	73,2	126,8	16,16
FALSK	High	Master Protein	P68366	Tubulin alpha-4A chain [OS=Homo sapiens]	FALSK	0	275,3424593	71,65178571	24	1098	7	1	448	49,892	5,06	High	High	High	High	High	High	High	High	High	High	High	High	High	High	High	High	High	High	High	High		7277	ENSG00000127824.13	TUBA4A	2	cell organization and biogenesis;transport	cytoplasm;cytoskeleton;cytosol;extracellular	catalytic activity;nucleotide binding;protein binding;structural molecule activity	Pf00091, Pf03953	0,577	-0,79	73,2	126,8	14,82
FALSK	High	Master Protein	P36871-1	Phosphoglucomutase-1 [OS=Homo sapiens]	FALSK	0	108,7119329	43,77224199	20	129	20	1	562	61,411	6,76	High	High	High	High	High	High	High	High	High	High	High	High	High	High	High	High	High	High	High	High		5236	ENSG00000079739.15	PGM1	1	metabolic process	cytoplasm;cytoskeleton;cytosol	catalytic activity;metal ion binding;protein binding	Pf00408, Pf02878, Pf02879, Pf02880	0,577	-0,79	73,2	126,8	14,49
FALSK	High	Master Protein	Q8N0X4	Citrate lyase subunit beta-like protein, mitochondrial [OS=Homo sapiens]	FALSK	0	10,02747755	9,117647059	3	4	3	1	340	37,336	8,73	High	High	High	High	High	High	High	High	High	High	High	High	High	High	High	High	High	High	High	High		171425	ENSG00000125246.15	CLYBL	13		mitochondrion	catalytic activity;metal ion binding	Pf03328, Pf15617	0,578	-0,79	73,2	126,8	7,3
FALSK	High	Master Protein	Q15050	Ribosome biogenesis regulatory protein homolog [OS=Homo sapiens]	FALSK	0	10,33018473	9,863013699	3	6	3	1	365	41,168	10,7	High	High	High	High	High	High	High	High	High	High	High	High	High	High	High	High	High	High	High	High	Acetyl [N-Term]	23212	ENSG00000179041.3	RRS1	8	cell differentiation;metabolic process;transport	chromosome;endoplasmic reticulum;nucleus	protein binding;RNA binding	Pf04939	0,578	-0,79	73,3	126,7	14,49
FALSK	High	Master Protein	Q96ME7	Zinc finger protein 512 [OS=Homo sapiens]	FALSK	0	12,46310715	7,936507937	3	6	3	1	567	64,641	9,76	High	High	High	High	High	High	High	High	High	High	High	High	High	High	High	High	High	High	High	High		84450	ENSG00000243943.9	ZNF512	2	metabolic process;regulation of biological process	nucleus	DNA binding;metal ion binding		0,579	-0,79	73,3	126,7	22,19
FALSK	High	Master Protein	Q96BW9-3	Isoform 3 of Phosphatidate cytidylyltransferase, mitochondrial [OS=Homo sapiens]	FALSK	0	9,944102838	9,495548961	3	5	3	1	337	38,055	9,13	High	High	High	High	High	High	High	High	High	High	High	High	High	High	High	High	High	High	High	High		132001	ENSG00000144559.10	TAMM41	3	metabolic process		catalytic activity	Pf09139	0,579	-0,79	73,4	126,6	27,03
FALSK	High	Master Protein	P51116	Fragile X mental retardation syndrome-related protein 2 [OS=Homo sapiens]	FALSK	0	34,86219329	15,75037147	7	18	5	1	673	74,178	6,23	High	High	High	High	High	High	High	High	High	High	High	High	High	High	High	High	High	High	High	High		9513	ENSG00000129245.11	FXR2	17	regulation of biological process	cytoplasm;membrane;nucleus	protein binding;RNA binding	Pf00013, Pf05641, Pf12235, Pf13014	0,581	-0,78	73,5	126,5	13,5
FALSK	High	Master Protein	Q9ULJ8-3	Isoform 3 of Neurabin-1 [OS=Homo sapiens]	FALSK	0	12,42616198	3,129548763	3	6	2	1	1374	153,956	5,59	High	High	High	High	High	Not Found	Not Found	High	Not Found	High	High	High	High	High	High	High	High	High	High	High		55607	ENSG00000158528.11	PPP1R9A	7	cell organization and biogenesis;metabolic process;regulation of biological process;response to stimulus;transport	cytoplasm;cytoskeleton;cytosol	catalytic activity;motor activity;protein binding	Pf00536, Pf00595, Pf01576, Pf02463, Pf04111, Pf04156, Pf05816, Pf07647, Pf07926, Pf14817	0,581	-0,78	73,5	126,5	28,01
FALSK	High	Master Protein	Q96RK4-2	Isoform 2 of Bardet-Biedl syndrome 4 protein [OS=Homo sapiens]	FALSK	0	9,100132942	5,69259962	3	4	3	1	527	59,046	7,71	High	High	High	High	High	High	High	High	High	High	High	High	High	High	High	High	High	High	High	High		585		BBS4	15	cell differentiation;cell organization and biogenesis;cellular component movement;regulation of biological process;response to stimulus;transport	cytosol;membrane;nucleus	catalytic activity;motor activity;protein binding	Pf00515, Pf07719, Pf10300, Pf13181, Pf13414, Pf13424, Pf13432, Pf14559	0,582	-0,78	73,6	126,4	17,6
FALSK	High	Master Protein	P49356	protein farnesyltransferase subunit beta [OS=Homo sapiens]	FALSK	0	10,49964254	5,720823799	2	8	2	1	437	48,742	5,82	High	High	High	High	High	High	High	High	High	High	High	High	High	High	High	High	High	High	High	High		2342	ENSG00000257365.7	FNTB	14	metabolic process;regulation of biological process;response to stimulus	cytosol	catalytic activity;metal ion binding;protein binding	Pf00432, Pf13243, Pf13249	0,582	-0,78	73,6	126,4	14,15
FALSK	High	Master Protein	Q13232	Nucleoside diphosphate kinase 3 [OS=Homo sapiens]	FALSK	0,000112082	7,238448011	12,4260355	2	9	1	1	169	19,003	7,84	High	High	High	High	High	High	High	High	High	High	High	High	High	High	High	High	High	High	High	High		4832	ENSG00000103024.7	NME3	16	cell death;metabolic process;regulation of biological process	mitochondrion	catalytic activity;metal ion binding;nucleotide binding;protein binding	Pf00334	0,583	-0,78	73,6	126,4	22,92
FALSK	High	Master Protein	P23786	Carnitine O-palmitoyltransferase 2, mitochondrial [OS=Homo sapiens]	FALSK	0,000112082	7,599807788	3,951367781	2	5	2	1	658	73,73	8,18	High	High	High	High	High	High	High	High	High	High	High	High	High	High	High	High	High	High	High	High		1376	ENSG00000157184.6	CPT2	1	metabolic process;transport	membrane;mitochondrion	catalytic activity	Pf00755	0,583	-0,78	73,7	126,3	17,32
FALSK	High	Master Protein	P18754-2	Isoform 2 of Regulator of chromosome condensation [OS=Homo sapiens]	FALSK	0	14,25490709	8,849557522	3	6	3	1	452	48,115	8,16	High	High	High	High	High	High	High	High	High	High	High	High	High	High	High	High	High	High	High	High		1104	ENSG00000180198.15	RCC1	1	cell division;cell organization and biogenesis;regulation of biological process	chromosome;cytoplasm;membrane;nucleus	DNA binding;protein binding	Pf00415, Pf13540	0,583	-0,78	73,7	126,3	32,02
FALSK	High	Master Protein	Q9P0L2-1	Serine/threonine-protein kinase MARK1 [OS=Homo sapiens]	FALSK	0	29,14233884	9,937106918	7	14	2	1	795	88,947	9,36	High	High	High	High	High	High	High	High	High	High	High	High	High	High	High	High	High	High	High	High		4139	ENSG00000116141.15	MARK1	1	cell organization and biogenesis;cellular component movement;metabolic process;regulation of biological process;response to stimulus	cytoplasm;cytoskeleton;membrane	catalytic activity;metal ion binding;nucleotide binding	Pf00069, Pf00627, Pf02149, Pf07714, Pf14531	0,584	-0,78	73,7	126,3	10,45
FALSK	High	Master Protein	Q8IWW8	hydroxyacid-oxoacid transhydrogenase, mitochondrial [OS=Homo sapiens]	FALSK	0,000396275	6,131797603	4,710920771	2	4	2	1	467	50,276	7,77	High	High	High	High	High	High	High	High	High	High	High	High	High	High	High	High	High	High	High	High		137872	ENSG00000147576.15	ADHFE1	8	metabolic process;transport	mitochondrion;organelle lumen	catalytic activity;metal ion binding	Pf00465, Pf13685	0,584	-0,78	73,7	126,3	23,83
FALSK	High	Master Protein	Q9Y3D6	mitochondrial fission 1 protein [OS=Homo sapiens]	FALSK	0	20,06358078	34,86842105	4	14	4	1	152	16,927	8,79	High	High	High	High	High	High	High	High	High	High	High	High	High	High	High	High	High	High	High	High	Acetyl [N-Term]	51024	ENSG00000214253.8	FIS1	7	cell death;cell organization and biogenesis;cellular homeostasis;metabolic process;regulation of biological process;response to stimulus;transport	endoplasmic reticulum;membrane;mitochondrion	protein binding	Pf14852, Pf14853	0,584	-0,78	73,8	126,2	10,72
FALSK	High	Master Protein	Q9NVT9	armadillo repeat-containing protein 1 [OS=Homo sapiens]	FALSK	0	11,64892582	10,9929078	3	5	3	1	282	31,261	5,74	High	High	High	High	High	High	High	High	High	High	High	High	High	High	High	High	High	High	High	High		55156	ENSG00000104442.9	ARMC1	8	transport	cytoplasm;mitochondrion;nucleus	metal ion binding;protein binding	Pf00514	0,585	-0,77	73,8	126,2	16,26
FALSK	High	Master Protein	P60763	Ras-related C3 botulinum toxin substrate 3 [OS=Homo sapiens]	FALSK	0	23,71211554	41,66666667	6	43	1	1	192	21,365	8,15	High	High	High	High	High	High	High	High	High	High	High	High	High	High	High	High	High	High	High	High		5881	ENSG00000169750.8	RAC3	17	cell communication;cell organization and biogenesis;regulation of biological process;response to stimulus	cytoplasm;cytoskeleton;cytosol;membrane	catalytic activity;nucleotide binding;protein binding	Pf00025, Pf00071, Pf08477	0,586	-0,77	73,9	126,1	12,34
FALSK	High	Master Protein	P84243	histone H3.3 [OS=Homo sapiens]	FALSK	0	54,46784081	52,20588235	7	113	2	1	136	15,319	11,27	High	High	High	High	High	High	High	High	High	High	High	High	High	High	High	High	High	High	High	High		3020; 440926; 3021	ENSG00000132475.9; ENSG00000163041.9	H3F3A; H3F3AP4; H3F3B	1; 2; 17	cell differentiation;cell organization and biogenesis;cell proliferation;coagulation;metabolic process;regulation of biological process;response to stimulus	chromosome;extracellular;nucleus	DNA binding;metal ion binding;protein binding	Pf00125, Pf15630	0,586	-0,77	73,9	126,1	6,57
FALSK	High	Master Protein	Q9C0D3	Protein zyg-11 homolog B [OS=Homo sapiens]	FALSK	0,000396275	5,583486139	3,494623656	2	3	2	1	744	83,867	6,86	High	High	High	High	High	High	High	High	High	High	High	High	High	High	High	High	High	High	High	High		79699	ENSG00000162378.12	ZYG11B	1	metabolic process;regulation of biological process		catalytic activity;protein binding	Pf12799	0,587	-0,77	73,9	126,1	5,61
FALSK	High	Master Protein	Q14738-1	Serine/threonine-protein phosphatase 2A 56 kDa regulatory subunit delta isoform [OS=Homo sapiens]	FALSK	0	71,41365763	38,37209302	19	47	15	1	602	69,947	8,13	High	High	High	High	High	High	High	High	High	High	High	High	High	High	High	High	High	High	High	High		5528	ENSG00000112640.14	PPP2R5D	6	metabolic process;regulation of biological process;response to stimulus	cytoplasm;cytosol;nucleus	catalytic activity;enzyme regulator activity;protein binding	Pf01603	0,587	-0,77	74	126	9,46
FALSK	High	Master Protein	O75973	C1q-related factor [OS=Homo sapiens]	FALSK	0	8,239503934	8,139534884	2	3	1	1	258	26,436	5,57	Not Found	Not Found	Not Found	Not Found	Not Found	High	High	High	High	High	Not Found	Not Found	Not Found	Not Found	Not Found	High	High	High	High	High		10882	ENSG00000131094.3	C1QL1	17	response to stimulus	cytoplasm;extracellular	protein binding	Pf00386	0,588	-0,77	74,1	125,9	16,06
FALSK	High	Master Protein	Q9UBU8-1	Mortality factor 4-like protein 1 [OS=Homo sapiens]	FALSK	0	12,10873714	13,5359116	4	4	4	1	362	41,448	9,28	High	High	High	High	High	High	High	High	High	High	High	High	High	High	High	High	High	High	High	High		10933	ENSG00000185787.14	MORF4L1	15	cell organization and biogenesis;cell proliferation;metabolic process;regulation of biological process;response to stimulus	nucleus	protein binding	Pf05712, Pf11717	0,588	-0,77	74,1	125,9	14,86
FALSK	High	Master Protein	Q04917	14-3-3 protein eta [OS=Homo sapiens]	FALSK	0	84,75944355	61,78861789	12	151	9	1	246	28,201	4,84	High	High	High	High	High	High	High	High	High	High	High	High	High	High	High	High	High	High	High	High		7533	ENSG00000128245.14	YWHAH	22	cell organization and biogenesis;metabolic process;regulation of biological process;response to stimulus;transport	cytoplasm;cytosol;membrane;mitochondrion	catalytic activity;protein binding	Pf00244	0,589	-0,76	74,1	125,9	9,81
FALSK	High	Master Protein	Q01433-1	AMP deaminase 2 [OS=Homo sapiens]	FALSK	0	33,53025218	11,26279863	9	21	9	1	879	100,624	6,93	High	High	High	High	High	High	High	High	High	High	High	High	High	High	High	High	High	High	High	High		271	ENSG00000116337.15	AMPD2	1	metabolic process	cytosol	catalytic activity;metal ion binding;protein binding	Pf00962	0,589	-0,76	74,1	125,9	8,38
FALSK	High	Master Protein	Q9Y2I8-2	Isoform 2 of WD repeat-containing protein 37 [OS=Homo sapiens]	FALSK	0	15,10522113	8,484848485	4	10	4	1	495	54,76	7,23	High	High	High	High	High	High	High	High	High	High	High	High	High	High	High	High	High	High	High	High		22884		WDR37	10			protein binding	Pf00400, Pf05103	0,589	-0,76	74,1	125,9	5,42
FALSK	High	Master Protein	Q9NUP9	Protein lin-7 homolog C [OS=Homo sapiens]	FALSK	0	20,04344404	29,44162437	6	28	4	1	197	21,82	8,43	High	High	High	High	High	High	High	High	High	High	High	High	High	High	High	High	High	High	High	High		55327	ENSG00000148943.11	LIN7C	11	cell organization and biogenesis;transport	cytoplasm;membrane	protein binding	Pf00595, Pf02828, Pf09829	0,59	-0,76	74,2	125,8	8,09
FALSK	High	Master Protein	Q8IYB5	Stromal membrane-associated protein 1 [OS=Homo sapiens]	FALSK	0	11,5322915	7,708779443	3	6	3	1	467	50,354	8,75	High	High	High	High	High	High	High	High	High	High	High	High	High	High	High	High	High	High	High	High		60682	ENSG00000112305.14	SMAP1	6	regulation of biological process	cytoplasm;membrane	enzyme regulator activity;metal ion binding;protein binding	Pf01412	0,59	-0,76	74,2	125,8	11,53
FALSK	High	Master Protein	P35269	General transcription factor iif subunit 1 [OS=Homo sapiens]	FALSK	0	7,895035427	5,996131528	2	4	2	1	517	58,205	7,49	High	High	High	High	High	Not Found	High	High	High	High	High	High	High	High	High	High	High	Not Found	High	High		2962	ENSG00000125651.13	GTF2F1	19	metabolic process;regulation of biological process;response to stimulus	nucleus	catalytic activity;DNA binding;enzyme regulator activity;protein binding;RNA binding	Pf05793	0,591	-0,76	74,3	125,7	31,3
FALSK	High	Master Protein	Q7Z4W1	L-xylulose reductase [OS=Homo sapiens]	FALSK	0	9,133036226	11,8852459	3	7	3	1	244	25,897	8,1	High	High	High	High	High	High	High	High	High	High	High	High	High	High	High	High	High	High	High	High		51181	ENSG00000169738.7	DCXR	17	cell organization and biogenesis;metabolic process	membrane;nucleus	catalytic activity;protein binding	Pf00106, Pf01488, Pf08659, Pf13460, Pf13561	0,591	-0,76	74,3	125,7	16,78
FALSK	High	Master Protein	P60891	ribose-phosphate pyrophosphokinase 1 [OS=Homo sapiens]	FALSK	0	67,91364405	42,13836478	10	50	5	1	318	34,812	6,98	High	High	High	High	High	High	High	High	High	High	High	High	High	High	High	High	High	High	High	High		5631	ENSG00000147224.10	PRPS1	X	metabolic process	cytosol	catalytic activity;metal ion binding;nucleotide binding;protein binding	Pf00156, Pf13793, Pf14572	0,591	-0,76	74,3	125,7	6,27
FALSK	High	Master Protein	P51784	Ubiquitin carboxyl-terminal hydrolase 11 [OS=Homo sapiens]	FALSK	0	22,55910893	7,268951194	5	12	3	1	963	109,747	5,45	High	High	High	High	High	High	High	High	High	High	High	High	High	High	High	High	High	High	High	High		8237	ENSG00000102226.9	USP11	X	metabolic process	cytoplasm;nucleus	catalytic activity;protein binding	Pf00443, Pf06337, Pf13423, Pf14533, Pf14836	0,592	-0,76	74,4	125,6	9,9
FALSK	High	Master Protein	P62341	Selenoprotein T [OS=Homo sapiens]	FALSK	0	7,862709515	11,79487179	2	8	2	1	195	22,31	8,6	High	High	High	High	High	High	High	High	High	High	High	High	High	High	High	High	High	High	High	High		51714	ENSG00000198843.12	SELT	3	metabolic process;regulation of biological process			Pf10262	0,594	-0,75	74,6	125,4	9,98
FALSK	High	Master Protein	Q5R372-5	Isoform 5 of Rab GTPase-activating protein 1-like [OS=Homo sapiens]	FALSK	0	9,491463967	6,613756614	2	8	1	1	378	43,861	6,57	High	High	High	High	High	High	High	High	High	High	High	High	High	High	High	High	High	High	High	High		9910	ENSG00000152061.23	RABGAP1L	1	regulation of biological process;transport	endosome;Golgi;nucleus	enzyme regulator activity;protein binding	Pf00566, Pf03148	0,594	-0,75	74,6	125,4	13,09
FALSK	High	Master Protein	Q8N3J6-3	Isoform 3 of Cell adhesion molecule 2 [OS=Homo sapiens]	FALSK	0	57,30247356	33,18077803	9	48	9	1	437	47,534	5,33	High	High	High	High	High	High	High	High	High	High	High	High	High	High	High	High	High	High	High	High		253559	ENSG00000175161.13	CADM2	3	cell organization and biogenesis	membrane	protein binding;receptor activity	Pf00047, Pf07654, Pf07679, Pf08205, Pf13895, Pf13927	0,594	-0,75	74,6	125,4	10,96
FALSK	High	Master Protein	Q496J9	Synaptic vesicle glycoprotein 2C [OS=Homo sapiens]	FALSK	0,000564493	4,252752152	2,200825309	2	4	1	1	727	82,288	5,05	High	High	High	High	High	Not Found	Not Found	Not Found	Not Found	Not Found	High	High	High	High	High	Not Found	Not Found	Not Found	Not Found	Not Found		22987	ENSG00000122012.13	SV2C	5	transport	membrane	transporter activity	Pf00083, Pf04955, Pf07690, Pf13347, Pf13576, Pf13599	0,595	-0,75	74,6	125,4	7,71
FALSK	High	Master Protein	Q9P121-4	Isoform 4 of Neurotrimin [OS=Homo sapiens]	FALSK	0	49,39878697	30,14084507	8	33	6	1	355	39,202	8	High	High	High	High	High	High	High	High	High	High	High	High	High	High	High	High	High	High	High	High		50863	ENSG00000182667.14	NTM	11		membrane	protein binding	Pf00047, Pf07679, Pf13895, Pf13927	0,595	-0,75	74,6	125,4	19,39
FALSK	High	Master Protein	O95343	Homeobox protein SIX3 [OS=Homo sapiens]	FALSK	0	7,649575818	7,831325301	2	2	2	1	332	35,465	8,73	Not Found	Not Found	Not Found	Not Found	Not Found	High	High	High	High	High	Not Found	Not Found	Not Found	Not Found	Not Found	High	High	High	High	High		6496	ENSG00000138083.4	SIX3	2	cell communication;cell death;cell differentiation;cell proliferation;cellular component movement;development;metabolic process;regulation of biological process;response to stimulus;transport	nucleus	DNA binding;protein binding	Pf00046, Pf05920	0,595	-0,75	74,6	125,4	12,15
FALSK	High	Master Protein	Q9NQ86	E3 ubiquitin-protein ligase Trim36 [OS=Homo sapiens]	FALSK	0,000396275	5,098046745	2,335164835	2	4	2	1	728	82,96	6,11	High	High	High	High	High	High	High	High	High	High	High	High	High	High	High	High	High	High	High	High		55521	ENSG00000152503.9	TRIM36	5	metabolic process;regulation of biological process;transport	cytoplasm;cytoskeleton;cytosol	catalytic activity;metal ion binding;protein binding;transporter activity	Pf00041, Pf00097, Pf00430, Pf00622, Pf00643, Pf13445, Pf13923	0,596	-0,75	74,7	125,3	13,41
FALSK	High	Master Protein	P41732	Tetraspanin-7 [OS=Homo sapiens]	FALSK	0,000396275	5,319554358	8,43373494	2	2	2	1	249	27,556	7,2	High	High	High	High	High	Not Found	Not Found	Not Found	Not Found	Not Found	High	High	High	High	High	Not Found	Not Found	Not Found	Not Found	Not Found		7102	ENSG00000156298.12	TSPAN7	X	regulation of biological process;response to stimulus	membrane		Pf00335, Pf09874	0,596	-0,75	74,7	125,3	3,08
FALSK	High	Master Protein	Q16740	ATP-dependent Clp protease proteolytic subunit, mitochondrial [OS=Homo sapiens]	FALSK	0	21,63689728	25,63176895	4	10	4	1	277	30,161	8,09	High	High	High	High	High	High	High	High	High	High	High	High	High	High	High	High	High	High	High	High		8192	ENSG00000125656.8	CLPP	19	cell organization and biogenesis;metabolic process	mitochondrion;organelle lumen	catalytic activity;protein binding	Pf00574	0,597	-0,74	74,8	125,2	14,94
FALSK	High	Master Protein	Q9NX47	E3 ubiquitin-protein ligase MARCH5 [OS=Homo sapiens]	FALSK	0	12,99050927	18,34532374	4	8	4	1	278	31,211	8,7	High	High	High	High	High	High	High	High	High	High	High	High	High	High	High	High	High	High	High	High		54708	ENSG00000198060.9	MARCH5	10	metabolic process;regulation of biological process	endoplasmic reticulum;membrane;mitochondrion	catalytic activity;metal ion binding;protein binding	Pf12906	0,598	-0,74	74,8	125,2	15,21
FALSK	High	Master Protein	Q86UE8	Serine/threonine-protein kinase tousled-like 2 [OS=Homo sapiens]	FALSK	0	8,656409889	4,533678756	3	5	2	1	772	87,606	8,41	High	High	High	High	High	High	High	High	High	High	High	High	High	High	High	High	High	High	High	High		11011	ENSG00000146872.17	TLK2	17	cell organization and biogenesis;metabolic process;regulation of biological process;response to stimulus	cytoplasm;cytoskeleton;nucleus	catalytic activity;nucleotide binding;protein binding	Pf00069, Pf07714	0,598	-0,74	74,9	125,1	21,23
FALSK	High	Master Protein	Q9NSD9	Phenylalanine--tRNA ligase beta subunit [OS=Homo sapiens]	FALSK	0	62,99654036	24,78777589	14	43	14	1	589	66,074	6,84	High	High	High	High	High	High	High	High	High	High	High	High	High	High	High	High	High	High	High	High		10056	ENSG00000116120.9	FARSB	2	cell organization and biogenesis;metabolic process	cytoplasm;cytosol;membrane	catalytic activity;metal ion binding;nucleotide binding;protein binding;RNA binding	Pf03483, Pf03484	0,598	-0,74	74,9	125,1	10,12
FALSK	High	Master Protein	Q9UPP1	Histone lysine demethylase PHF8 [OS=Homo sapiens]	FALSK	0	9,024385872	1,981132075	2	3	1	1	1060	117,79	8,72	High	High	High	High	High	High	High	High	High	High	High	High	High	High	High	High	High	High	High	High		23133	ENSG00000172943.19	PHF8	X	cell organization and biogenesis;metabolic process;regulation of biological process	membrane;nucleus	catalytic activity;metal ion binding;protein binding	Pf00628, Pf02373, Pf13621	0,598	-0,74	74,9	125,1	12,25
FALSK	High	Master Protein	Q9NZW5	MAGUK p55 subfamily member 6 [OS=Homo sapiens]	FALSK	0	34,11926331	22,40740741	11	22	10	1	540	61,079	6,18	High	High	High	High	High	High	High	High	High	High	High	High	High	High	High	High	High	High	High	High		51678	ENSG00000105926.15	MPP6	7	cell organization and biogenesis	membrane	protein binding	Pf00018, Pf00595, Pf00625, Pf02828, Pf07653, Pf13180, Pf14604, Pf14685	0,599	-0,74	74,9	125,1	27,09
FALSK	High	Master Protein	Q96QZ7	Membrane-associated guanylate kinase, WW and PDZ domain-containing protein 1 [OS=Homo sapiens]	FALSK	0	8,227310912	2,749832327	2	3	2	1	1491	164,481	7,58	High	High	High	High	High	High	High	High	High	High	High	High	High	High	High	High	High	High	High	High		9223		MAGI1	3	cell death;cell organization and biogenesis;regulation of biological process;response to stimulus	cytoplasm;membrane;nucleus	nucleotide binding;protein binding;structural molecule activity	Pf00397, Pf00595, Pf00625, Pf13180	0,599	-0,74	74,9	125,1	9,74
FALSK	High	Master Protein	Q9UK99	F-box only protein 3 [OS=Homo sapiens]	FALSK	0	21,75714777	14,22505308	5	12	5	1	471	54,525	5	High	High	High	High	High	High	High	High	High	High	High	High	High	High	High	High	High	High	High	High		26273	ENSG00000110429.13	FBXO3	11	metabolic process;regulation of biological process	cytoplasm;cytosol;nucleus	catalytic activity;protein binding	Pf00646, Pf04379, Pf06881, Pf09346, Pf12937	0,599	-0,74	74,9	125,1	17,62
FALSK	High	Master Protein	Q8N568-3	Isoform 3 of Serine/threonine-protein kinase DCLK2 [OS=Homo sapiens]	FALSK	0	30,65584758	16,21966794	10	15	9	1	783	85,33	8,53	High	High	High	High	High	High	High	High	High	High	High	High	High	High	High	High	High	High	High	High		166614	ENSG00000170390.15	DCLK2	4	metabolic process;regulation of biological process;response to stimulus	cytoplasm;cytoskeleton	catalytic activity;nucleotide binding	Pf00069, Pf03607, Pf07714, Pf14531	0,599	-0,74	75	125	11,9
FALSK	High	Master Protein	Q3SYG4	Protein PTHB1 [OS=Homo sapiens]	FALSK	0	10,00511595	3,494926719	2	3	2	1	887	99,217	5,55	High	High	High	High	High	High	High	High	High	High	High	High	High	High	High	High	High	High	High	High		27241	ENSG00000122507.20	BBS9	7	cell differentiation;cell organization and biogenesis;response to stimulus;transport	cytoplasm;cytoskeleton;cytosol;membrane	protein binding	Pf14727, Pf14728	0,599	-0,74	75	125	12,94
FALSK	High	Master Protein	P35612-1	Beta-adducin [OS=Homo sapiens]	FALSK	0	57,4357391	23,8292011	14	34	13	1	726	80,803	5,92	High	High	High	High	High	High	High	High	High	High	High	High	High	High	High	High	High	High	High	High		119	ENSG00000075340.22	ADD2	2	cell organization and biogenesis;regulation of biological process;transport	cytoplasm;cytoskeleton;cytosol;membrane	protein binding;structural molecule activity	Pf00596	0,6	-0,74	75	125	14,62
FALSK	High	Master Protein	O75044	SLIT-ROBO Rho GTPase-activating protein 2 [OS=Homo sapiens]	FALSK	0	16,87972677	7,843137255	6	8	6	1	1071	120,805	6,7	High	High	High	High	High	High	High	High	High	High	High	High	High	High	High	High	High	High	High	High		23380		SRGAP2	1	cell organization and biogenesis;cell proliferation;regulation of biological process;response to stimulus	cytoplasm;cytosol;membrane;nucleus	enzyme regulator activity;protein binding	Pf00018, Pf00611, Pf00620, Pf07653, Pf14604	0,6	-0,74	75	125	15,53
FALSK	High	Master Protein	Q9P0M6	Core histone macro-H2A.2 [OS=Homo sapiens]	FALSK	0	56,73167397	38,97849462	12	45	11	1	372	40,033	9,69	High	High	High	High	High	High	High	High	High	High	High	High	High	High	High	High	High	High	High	High		55506	ENSG00000099284.13	H2AFY2	10	cell organization and biogenesis;regulation of biological process	chromosome;nucleus	DNA binding;protein binding	Pf00125, Pf01661	0,6	-0,74	75	125	8,41
FALSK	High	Master Protein	O95249-1	Golgi SNAP receptor complex member 1 [OS=Homo sapiens]	FALSK	0	12,10544697	16,8	3	4	3	1	250	28,595	9,42	High	High	High	High	High	High	High	High	High	High	High	High	High	High	High	High	High	High	High	High		9527	ENSG00000108587.15	GOSR1	17	cell organization and biogenesis;regulation of biological process;transport	cytosol;Golgi;membrane	protein binding	Pf12352	0,601	-0,73	75,1	124,9	15,85
FALSK	High	Master Protein	Q4V328	GRIP1-associated protein 1 [OS=Homo sapiens]	FALSK	0	52,15963176	21,64090369	12	23	12	1	841	95,931	5,11	High	High	High	High	High	High	High	High	High	High	High	High	High	High	High	High	High	High	High	High		56850		GRIPAP1	X		endosome	protein binding		0,602	-0,73	75,1	124,9	8,91
FALSK	High	Master Protein	P82930	28S ribosomal protein S34, mitochondrial [OS=Homo sapiens]	FALSK	0,001875373	3,141165154	9,633027523	2	2	2	1	218	25,634	9,98	High	High	High	High	High	Not Found	Not Found	Not Found	Not Found	Not Found	High	High	High	High	High	Not Found	Not Found	Not Found	Not Found	Not Found		65993	ENSG00000074071.14	MRPS34	16	cell organization and biogenesis;metabolic process	membrane;mitochondrion;ribosome	structural molecule activity		0,602	-0,73	75,2	124,8	9,46
FALSK	High	Master Protein	Q8NE86	Calcium uniporter protein, mitochondrial [OS=Homo sapiens]	FALSK	0	10,33335182	14,52991453	4	6	4	1	351	39,842	8,65	High	High	High	High	High	High	High	High	High	High	High	High	High	High	High	High	High	High	High	High		90550	ENSG00000156026.14	MCU	10	cell organization and biogenesis;cellular homeostasis;defense response;metabolic process;regulation of biological process;response to stimulus;transport	membrane;mitochondrion	catalytic activity;protein binding;transporter activity	Pf04678	0,602	-0,73	75,2	124,8	3,21
FALSK	High	Master Protein	Q8WXF1	Paraspeckle component 1 [OS=Homo sapiens]	FALSK	0	52,86565924	32,50478011	13	33	12	1	523	58,706	6,67	High	High	High	High	High	High	High	High	High	High	High	High	High	High	High	High	High	High	High	High		55269	ENSG00000121390.18	PSPC1	13	metabolic process;regulation of biological process	cytoplasm;nucleus	DNA binding;nucleotide binding;protein binding;RNA binding	Pf00076, Pf08075, Pf13893, Pf14259	0,603	-0,73	75,2	124,8	10,74
FALSK	High	Master Protein	Q04760-1	lactoylglutathione lyase [OS=Homo sapiens]	FALSK	0	19,15833188	16,84782609	5	19	5	1	184	20,764	5,31	High	High	High	High	High	High	High	High	High	High	High	High	High	High	High	High	High	High	High	High		2739	ENSG00000124767.6	GLO1	6	cell differentiation;metabolic process;regulation of biological process	cytoplasm;cytosol	catalytic activity;metal ion binding	Pf00903, Pf12681, Pf13669	0,603	-0,73	75,2	124,8	12,65
FALSK	High	Master Protein	Q8TDZ2-4	Isoform 4 of Protein-methionine sulfoxide oxidase MICAL1 [OS=Homo sapiens]	FALSK	0,001439626	3,916705978	2,486187845	2	3	2	1	1086	119,746	6,38	High	High	High	High	High	High	High	High	High	High	High	High	High	High	High	High	High	High	High	High		64780	ENSG00000135596.17	MICAL1	6	cell organization and biogenesis;metabolic process;regulation of biological process;response to stimulus	cytoplasm	catalytic activity;metal ion binding;nucleotide binding;protein binding	Pf00307, Pf00412, Pf00890, Pf01266, Pf01494, Pf07992, Pf11971, Pf12130, Pf13450	0,603	-0,73	75,2	124,8	9,45
FALSK	High	Master Protein	P32418	Sodium/calcium exchanger 1 [OS=Homo sapiens]	FALSK	0	18,95008603	6,68036999	7	11	3	1	973	108,478	5	High	High	High	High	High	High	High	High	High	High	High	High	High	High	High	High	High	High	High	High		6546	ENSG00000183023.18	SLC8A1	2	cell communication;cellular homeostasis;regulation of biological process;response to stimulus;transport	cytosol;membrane;mitochondrion	metal ion binding;protein binding;transporter activity	Pf01699, Pf03160	0,604	-0,73	75,3	124,7	12,22
FALSK	High	Master Protein	O95626	Acidic leucine-rich nuclear phosphoprotein 32 family member D [OS=Homo sapiens]	FALSK	0	13,30317563	17,55725191	3	18	1	1	131	14,797	5,02	High	High	High	High	High	High	High	High	High	High	High	High	High	High	High	High	High	High	High	High		23519	ENSG00000139223.2	ANP32D	12	cell organization and biogenesis;regulation of biological process;transport	nucleus	protein binding	Pf12799	0,604	-0,73	75,3	124,7	10,51
FALSK	High	Master Protein	O95429	BAG family molecular chaperone regulator 4 [OS=Homo sapiens]	FALSK	0,000396275	6,482023538	5,470459519	3	8	2	1	457	49,563	5,12	High	High	High	High	High	High	High	High	High	High	High	High	High	High	High	High	High	High	High	High		9530	ENSG00000156735.10	BAG4	8	cell organization and biogenesis;metabolic process;regulation of biological process;response to stimulus	cytoplasm;cytosol;membrane;nucleus	enzyme regulator activity;nucleotide binding;protein binding;RNA binding;signal transducer activity	Pf02179	0,604	-0,73	75,3	124,7	10
FALSK	High	Master Protein	P50416	Carnitine O-palmitoyltransferase 1, liver isoform [OS=Homo sapiens]	FALSK	0	9,636731079	3,492884864	2	3	2	1	773	88,311	8,65	High	High	High	High	High	High	High	High	High	High	High	High	High	High	High	High	High	High	High	High		1374	ENSG00000110090.12	CPT1A	11	cell differentiation;cell organization and biogenesis;metabolic process;regulation of biological process;response to stimulus;transport	membrane;mitochondrion	catalytic activity;protein binding	Pf00755	0,604	-0,73	75,3	124,7	13,83
FALSK	High	Master Protein	Q8TDI0	Chromodomain-helicase-DNA-binding protein 5 [OS=Homo sapiens]	FALSK	0	34,99103472	5,834186285	8	13	1	1	1954	222,909	6,15	High	High	High	High	High	Not Found	Not Found	Not Found	Not Found	Not Found	High	High	High	High	High	Not Found	Not Found	Not Found	Not Found	Not Found		26038	ENSG00000116254.17	CHD5	1	cell differentiation;cell organization and biogenesis;metabolic process;regulation of biological process	membrane;nucleus	catalytic activity;DNA binding;metal ion binding;nucleotide binding;protein binding	Pf00176, Pf00271, Pf00385, Pf00628, Pf06461, Pf06465, Pf08073, Pf08074	0,604	-0,73	75,3	124,7	12,92
FALSK	High	Master Protein	P43243	Matrin-3 [OS=Homo sapiens]	FALSK	0	101,8161623	22,5501771	14	81	14	1	847	94,565	6,25	High	High	High	High	High	High	High	High	High	High	High	High	High	High	High	High	High	High	High	High		9782	ENSG00000015479.17; ENSG00000280987.3	MATR3	5	regulation of biological process	membrane;nucleus	metal ion binding;nucleotide binding;protein binding;RNA binding;structural molecule activity	Pf00076, Pf13893, Pf14259	0,605	-0,72	75,4	124,6	9,44
FALSK	High	Master Protein	P54920	alpha-soluble nsf attachment protein [OS=Homo sapiens]	FALSK	0	92,38944348	63,05084746	14	69	11	1	295	33,211	5,36	High	High	High	High	High	High	High	High	High	High	High	High	High	High	High	High	High	High	High	High		8775	ENSG00000105402.7	NAPA	19	cell communication;cell differentiation;cell organization and biogenesis;regulation of biological process;transport	cytosol;membrane	protein binding	Pf14938	0,606	-0,72	75,5	124,5	13,4
FALSK	High	Master Protein	P18084	Integrin beta-5 [OS=Homo sapiens]	FALSK	0	10,92095432	7,008760951	3	10	2	1	799	87,996	6,06	High	High	High	High	High	High	High	High	High	High	High	High	High	High	High	High	High	High	High	High		3693	ENSG00000082781.11	ITGB5	3	cell differentiation;cell organization and biogenesis;regulation of biological process;response to stimulus	cell surface;membrane	protein binding;receptor activity	Pf00362, Pf07965, Pf08725	0,606	-0,72	75,5	124,5	11,2
FALSK	High	Master Protein	P62158	Calmodulin [OS=Homo sapiens]	FALSK	0	59,4855601	44,29530201	7	74	7	1	149	16,827	4,22	High	High	High	High	High	High	High	High	High	High	High	High	High	High	High	High	High	High	High	High		808; 805; 801	ENSG00000160014.16; ENSG00000143933.16; ENSG00000198668.10	CALM3; CALM2; CALM1	19; 2; 14	metabolic process;regulation of biological process;response to stimulus;transport	cytoplasm;cytoskeleton;cytosol;extracellular;membrane;nucleus	catalytic activity;enzyme regulator activity;metal ion binding;protein binding;transporter activity	Pf00036, Pf08726, Pf12763, Pf13202, Pf13405, Pf13499, Pf13833, Pf14658	0,606	-0,72	75,5	124,5	6,74
FALSK	High	Master Protein	P63098	Calcineurin subunit B type 1 [OS=Homo sapiens]	FALSK	0	43,02011652	37,64705882	6	20	6	1	170	19,288	4,81	High	High	High	High	High	High	High	High	High	High	High	High	High	High	High	High	High	High	High	High		5534	ENSG00000221823.10	PPP3R1	2	cell differentiation;cell organization and biogenesis;metabolic process;regulation of biological process;response to stimulus;transport	cytoplasm;cytosol;membrane;mitochondrion	catalytic activity;metal ion binding;protein binding	Pf00036, Pf12763, Pf13405, Pf13499, Pf13833	0,607	-0,72	75,5	124,5	12,88
FALSK	High	Master Protein	P05771-2	Isoform Beta-II of Protein kinase C beta type [OS=Homo sapiens]	FALSK	0	46,36169934	19,31649331	9	36	2	1	673	76,962	7,02	Not Found	Not Found	Not Found	Not Found	Not Found	High	High	High	High	High	Not Found	Not Found	Not Found	Not Found	Not Found	High	High	High	High	High		5579	ENSG00000166501.12	PRKCB	16	cell death;cell organization and biogenesis;cellular homeostasis;metabolic process;regulation of biological process;response to stimulus;transport	cytoplasm;cytosol;membrane;nucleus	catalytic activity;metal ion binding;nucleotide binding;protein binding	Pf00069, Pf00130, Pf00168, Pf00433, Pf07714	0,607	-0,72	75,5	124,5	10,08
FALSK	High	Master Protein	Q12849	G-rich sequence factor 1 [OS=Homo sapiens]	FALSK	0	16,91273775	11,45833333	4	7	4	1	480	53,093	6,19	High	High	High	High	High	High	High	High	High	High	High	High	High	High	High	High	High	High	High	High		2926	ENSG00000132463.13	GRSF1	4	metabolic process	cytoplasm;mitochondrion	nucleotide binding;RNA binding	Pf00076, Pf14259	0,607	-0,72	75,5	124,5	12,37
FALSK	High	Master Protein	Q5HYI7	Metaxin-3 [OS=Homo sapiens]	FALSK	0,000396275	6,328708553	5,769230769	2	3	2	1	312	35,071	7,8	High	High	High	High	High	High	High	High	High	High	High	High	High	High	High	High	High	High	High	High		345778	ENSG00000177034.14	MTX3	5	transport	membrane;mitochondrion		Pf10568, Pf11801, Pf13410, Pf14497	0,607	-0,72	75,5	124,5	13,7
FALSK	High	Master Protein	P31323	cAMP-dependent protein kinase type II-beta regulatory subunit [OS=Homo sapiens]	FALSK	0	64,17034055	39,47368421	11	37	9	1	418	46,273	4,92	High	High	High	High	High	High	High	High	High	High	High	High	High	High	High	High	High	High	High	High		5577	ENSG00000005249.12	PRKAR2B	7	coagulation;metabolic process;regulation of biological process;response to stimulus	cytoplasm;cytosol;membrane	catalytic activity;enzyme regulator activity;nucleotide binding;protein binding	Pf00027, Pf02197	0,607	-0,72	75,6	124,4	9,3
FALSK	High	Master Protein	Q8N983-4	Isoform 4 of 39S ribosomal protein L43, mitochondrial [OS=Homo sapiens]	FALSK	0,000396275	5,788664448	15,09433962	2	4	2	1	159	17,842	9,88	High	High	High	High	High	High	High	High	High	High	High	High	High	High	High	High	High	High	High	High		84545	ENSG00000055950.16	MRPL43	10	cell organization and biogenesis;metabolic process	membrane;ribosome	protein binding;RNA binding;structural molecule activity	Pf05047	0,607	-0,72	75,6	124,4	9
FALSK	High	Master Protein	Q2Y0W8	Electroneutral sodium bicarbonate exchanger 1 [OS=Homo sapiens]	FALSK	0	28,24441547	7,319304666	7	15	2	1	1093	122,858	6,68	High	High	High	High	High	High	High	High	High	High	High	High	High	High	High	High	High	High	High	High		9498	ENSG00000050438.16	SLC4A8	12	cellular homeostasis;transport	membrane	transporter activity	Pf00955, Pf07565	0,608	-0,72	75,6	124,4	21,59
FALSK	High	Master Protein	Q8WXF7-2	Isoform 2 of Atlastin-1 [OS=Homo sapiens]	FALSK	0	26,20227749	19,71066908	8	19	8	1	553	63,015	6,28	High	High	High	High	High	High	High	High	High	High	High	High	High	High	High	High	High	High	High	High		51062	ENSG00000198513.11	ATL1	14	cell organization and biogenesis	endoplasmic reticulum;Golgi;membrane	catalytic activity;nucleotide binding;protein binding	Pf02263	0,609	-0,71	75,7	124,3	8,82
FALSK	High	Master Protein	Q9UKA9-2	Isoform 2 of Polypyrimidine tract-binding protein 2 [OS=Homo sapiens]	FALSK	0	67,50779282	34,39849624	10	30	9	1	532	57,611	8,81	High	High	High	High	High	High	High	High	High	High	High	High	High	High	High	High	High	High	High	High	Acetyl [N-Term]	58155	ENSG00000117569.18	PTBP2	1	cell organization and biogenesis;metabolic process;regulation of biological process	nucleus;spliceosomal complex	nucleotide binding;RNA binding	Pf00076, Pf13893, Pf14259	0,61	-0,71	75,7	124,3	12,33
FALSK	High	Master Protein	Q641Q2	WASH complex subunit FAM21A [OS=Homo sapiens]	FALSK	0	19,3869393	5,443698732	5	13	5	1	1341	147,095	4,81	High	High	High	High	High	High	High	High	High	High	High	High	High	High	High	High	High	High	High	High		387680	ENSG00000099290.15	FAM21A	10	transport	cytoplasm;cytosol;endosome;membrane		Pf15255	0,61	-0,71	75,8	124,2	15,75
FALSK	High	Master Protein	P04181-1	Ornithine aminotransferase, mitochondrial [OS=Homo sapiens]	FALSK	0	13,02473481	7,061503417	2	7	2	1	439	48,504	7,03	High	High	High	High	High	High	High	High	High	High	High	High	High	High	High	High	High	High	High	High		4942	ENSG00000065154.11	OAT	10	cell organization and biogenesis;metabolic process	cytoplasm;mitochondrion;organelle lumen	catalytic activity;protein binding	Pf00202	0,61	-0,71	75,8	124,2	22,54
FALSK	High	Master Protein	P32418-4	Isoform 10 of Sodium/calcium exchanger 1 [OS=Homo sapiens]	FALSK	0	13,43705401	4,870466321	5	6	1	1	965	107,782	5,07	High	High	High	High	High	Not Found	Not Found	Not Found	Not Found	Not Found	High	High	High	High	High	Not Found	Not Found	Not Found	Not Found	Not Found		6546	ENSG00000183023.18	SLC8A1	2	cell communication;cellular homeostasis;regulation of biological process;response to stimulus;transport	cytosol;membrane;mitochondrion	metal ion binding;protein binding;transporter activity	Pf01699, Pf03160	0,61	-0,71	75,8	124,2	9,58
FALSK	High	Master Protein	P12271	Retinaldehyde-binding protein 1 [OS=Homo sapiens]	FALSK	0	28,97888404	20,18927445	4	62	4	1	317	36,451	5,05	High	High	High	High	High	High	High	High	High	High	High	High	High	High	High	High	High	High	High	High		6017	ENSG00000140522.11	RLBP1	15	metabolic process;response to stimulus;transport	cytoplasm;cytosol	transporter activity	Pf00650, Pf03765, Pf13716	0,612	-0,71	75,9	124,1	22,03
FALSK	High	Master Protein	O43424	Glutamate receptor ionotropic, delta-2 [OS=Homo sapiens]	FALSK	0	7,795209984	2,581926514	2	5	2	1	1007	113,284	6,07	High	High	High	High	High	High	High	High	High	High	High	High	High	High	High	High	High	High	High	High		2895	ENSG00000152208.12	GRID2	4	cell communication;cell differentiation;regulation of biological process;response to stimulus;transport	membrane	protein binding;receptor activity;signal transducer activity;transporter activity	Pf00060, Pf00497, Pf01094, Pf10613	0,612	-0,71	75,9	124,1	17,81
FALSK	High	Master Protein	P21912	Succinate dehydrogenase [ubiquinone] iron-sulfur subunit, mitochondrial [OS=Homo sapiens]	FALSK	0	22,01023329	19,64285714	5	13	1	1	280	31,609	8,76	High	High	High	High	High	High	High	High	High	High	High	High	High	High	High	High	High	High	High	High		6390	ENSG00000117118.9	SDHB	1	metabolic process;transport	membrane;mitochondrion	catalytic activity;metal ion binding;protein binding	Pf13085, Pf13183, Pf13534	0,612	-0,71	75,9	124,1	25,57
FALSK	High	Master Protein	P51797-5	Isoform 5 of Chloride transport protein 6 [OS=Homo sapiens]	FALSK	0	9,462131398	6,190975866	4	5	4	1	953	106,307	7,33	High	High	High	High	High	High	High	High	High	High	High	High	High	High	High	High	High	High	High	High		1185	ENSG00000011021.21	CLCN6	1	cellular homeostasis;regulation of biological process;response to stimulus;transport	membrane	nucleotide binding;transporter activity	Pf00571, Pf00654	0,612	-0,71	76	124	19,99
FALSK	High	Master Protein	Q86X10-1	Ral GTPase-activating protein subunit beta [OS=Homo sapiens]	FALSK	0,000396275	5,049886739	1,941097724	2	2	2	1	1494	166,692	6,79	High	High	High	High	High	High	High	High	High	High	High	High	High	High	High	High	High	High	High	High		57148	ENSG00000170471.14	RALGAPB	20	regulation of biological process		enzyme regulator activity;protein binding	Pf02145	0,612	-0,71	76	124	21,96
FALSK	High	Master Protein	P09496-1	clathrin light chain A [OS=Homo sapiens]	FALSK	0	16,03686223	22,17741935	7	53	7	1	248	27,06	4,51	High	High	High	High	High	High	High	High	High	High	High	High	High	High	High	High	High	High	High	High		1211	ENSG00000122705.16	CLTA	9	cell division;cell organization and biogenesis;cellular component movement;regulation of biological process;transport	cytoplasm;cytoskeleton;cytosol;membrane	protein binding;structural molecule activity	Pf01086	0,613	-0,71	76	124	8,02
FALSK	High	Master Protein	Q13153	Serine/threonine-protein kinase PAK 1 [OS=Homo sapiens]	FALSK	0	34,49078428	18,16513761	9	32	3	1	545	60,609	5,76	High	High	High	High	High	High	High	High	High	High	High	High	High	High	High	High	High	High	High	High		5058	ENSG00000149269.9	PAK1	11	cell death;cell organization and biogenesis;metabolic process;regulation of biological process;response to stimulus;transport	cytoplasm;cytosol;Golgi;membrane	catalytic activity;nucleotide binding;protein binding;signal transducer activity	Pf00069, Pf00786, Pf07714, Pf14531	0,614	-0,7	76,1	123,9	7,64
FALSK	High	Master Protein	A5GFY8	D-3-phosphoglycerate dehydrogenase [OS=Sus scrofa]	FALSK	0	119,1035838	43,15196998	19	88	9	1	533	56,774	6,89	High	High	High	High	High	High	High	High	High	High	High	High	High	High	High	High	High	High	High	High		100144529	ENSSSCG00000006717.1	PHGDH	4	metabolic process		catalytic activity;nucleotide binding	Pf00389, Pf02826	0,615	-0,7	76,1	123,9	11,13
FALSK	High	Master Protein	Q00535	Cyclin-dependent-like kinase 5 [OS=Homo sapiens]	FALSK	0	25,98083488	26,02739726	7	19	6	1	292	33,283	7,66	High	High	High	High	High	High	High	High	High	High	High	High	High	High	High	High	High	High	High	High		1020	ENSG00000164885.12	CDK5	7	cell communication;cell death;cell differentiation;cell division;cell growth;cell organization and biogenesis;cell proliferation;cellular component movement;metabolic process;regulation of biological process;response to stimulus;transport	cytoplasm;cytoskeleton;cytosol;membrane;nucleus	catalytic activity;nucleotide binding;protein binding	Pf00069, Pf07714	0,615	-0,7	76,1	123,9	7,13
FALSK	High	Master Protein	Q9BT40	Inositol polyphosphate 5-phosphatase K [OS=Homo sapiens]	FALSK	0	9,320884399	5,133928571	2	5	2	1	448	51,058	6,54	High	High	High	High	High	High	High	High	High	High	High	High	High	High	High	High	High	High	High	High		51763	ENSG00000132376.19	INPP5K	17	cell organization and biogenesis;metabolic process;regulation of biological process;response to stimulus;transport	cytoplasm;cytosol;endoplasmic reticulum;membrane;nucleus	catalytic activity;protein binding;receptor activity;signal transducer activity	Pf03372, Pf07888	0,615	-0,7	76,2	123,8	14,42
FALSK	High	Master Protein	P23471-1	Receptor-type tyrosine-protein phosphatase zeta [OS=Homo sapiens]	FALSK	0	20,03479713	3,066954644	6	11	6	1	2315	254,429	4,88	High	High	High	High	High	High	High	High	High	High	High	High	High	High	High	High	High	High	High	High		5803	ENSG00000106278.11	PTPRZ1	7	cell differentiation;cell organization and biogenesis;metabolic process;regulation of biological process;response to stimulus	cytoplasm;extracellular;membrane	catalytic activity;protein binding;receptor activity;signal transducer activity	Pf00041, Pf00102, Pf00194	0,616	-0,7	76,2	123,8	9,31
FALSK	High	Master Protein	P24540-1	Acylphosphatase-1 [OS=Sus scrofa]	FALSK	0	21,68744923	43,56435644	3	14	3	1	101	11,42	8,41	High	High	High	High	High	High	High	High	High	High	High	High	High	High	High	High	High	High	High	High		100155997		ACYP1	7			catalytic activity	Pf00708	0,616	-0,7	76,2	123,8	9,07
FALSK	High	Master Protein	Q8N0W4-2	Isoform 2 of Neuroligin-4, X-linked [OS=Homo sapiens]	FALSK	0	34,25196425	14,59330144	9	16	5	1	836	93,988	6,05	High	High	High	High	High	High	High	High	High	High	High	High	High	High	High	High	High	High	High	High		57502		NLGN4X	X	cell differentiation;cell organization and biogenesis;metabolic process;response to stimulus	cell surface;membrane	catalytic activity;protein binding;receptor activity	Pf00135, Pf07859	0,617	-0,7	76,3	123,7	28,1
FALSK	High	Master Protein	O75122-3	Isoform 3 of CLIP-associating protein 2 [OS=Homo sapiens]	FALSK	0	129,4209494	28,58085809	32	64	28	1	1515	165,821	8,37	High	High	High	High	High	High	High	High	High	High	High	High	High	High	High	High	High	High	High	High								protein binding	Pf02985, Pf12348	0,617	-0,7	76,3	123,7	5,99
FALSK	High	Master Protein	Q9H1E5	Thioredoxin-related transmembrane protein 4 [OS=Homo sapiens]	FALSK	0	15,1733427	10,31518625	3	8	3	1	349	38,928	4,37	High	High	High	High	High	High	High	High	High	High	High	High	High	High	High	High	High	High	High	High		56255	ENSG00000125827.8	TMX4	20	cellular homeostasis;metabolic process;regulation of biological process;response to stimulus;transport	endoplasmic reticulum;membrane	catalytic activity	Pf00085	0,618	-0,7	76,4	123,6	10,02
FALSK	High	Master Protein	Q16134	Electron transfer flavoprotein-ubiquinone oxidoreductase, mitochondrial [OS=Homo sapiens]	FALSK	0	41,13305339	17,50405186	9	20	1	1	617	68,452	7,55	Not Found	Not Found	Not Found	Not Found	Not Found	High	High	High	High	High	Not Found	Not Found	Not Found	Not Found	Not Found	High	High	High	High	High		2110	ENSG00000171503.11	ETFDH	4	metabolic process;response to stimulus;transport	membrane;mitochondrion;organelle lumen	catalytic activity;metal ion binding;nucleotide binding	Pf00890, Pf01266, Pf01494, Pf01946, Pf03486, Pf05187, Pf05834, Pf07992, Pf12831, Pf12838, Pf13450, Pf13454, Pf13738	0,618	-0,69	76,4	123,6	22,28
FALSK	High	Master Protein	Q8NFP9-1	Neurobeachin [OS=Homo sapiens]	FALSK	0	46,25394478	4,650373388	10	18	7	1	2946	327,614	6,18	High	High	High	High	High	High	High	High	High	High	High	High	High	High	High	High	High	High	High	High		26960	ENSG00000172915.18	NBEA	13		cytoplasm;cytosol;membrane	protein binding	Pf02138, Pf06469, Pf13385, Pf14844	0,619	-0,69	76,4	123,6	6,33
FALSK	High	Master Protein	Q8N3F0-1	Maturin [OS=Homo sapiens]	FALSK	0	14,88573511	28,24427481	3	9	3	1	131	14,916	4,17	High	High	High	High	High	High	High	High	High	High	High	High	High	High	High	High	High	High	High	High	Acetyl [N-Term]	222166	ENSG00000180354.15	C7orf41; MTURN	7	development			Pf15167	0,619	-0,69	76,4	123,6	7,14
FALSK	High	Master Protein	Q5TCQ9-4	Isoform 4 of Membrane-associated guanylate kinase, WW and PDZ domain-containing protein 3 [OS=Homo sapiens]	FALSK	0	19,480692	4,65901418	5	6	5	1	1481	162,848	8,09	High	High	High	High	High	High	High	High	High	High	High	High	High	High	High	High	High	High	High	High		260425	ENSG00000081026.18	MAGI3	1	cell death;metabolic process;regulation of biological process;response to stimulus	membrane;nucleus	catalytic activity;nucleotide binding;protein binding;structural molecule activity	Pf00397, Pf00595, Pf00625, Pf09726, Pf13180	0,619	-0,69	76,5	123,5	8,46
FALSK	High	Master Protein	Q8MI68	Methylmalonyl-CoA mutase, mitochondrial [OS=Sus scrofa]	FALSK	0,000396275	6,329215548	2,8	2	3	1	1	750	83,284	8,19	High	High	High	High	High	High	High	High	High	High	High	High	High	High	High	High	High	High	High	High		399535		MUT	7	metabolic process	mitochondrion;organelle lumen	catalytic activity;metal ion binding	Pf01642, Pf02310	0,619	-0,69	76,5	123,5	56,97
FALSK	High	Master Protein	Q9UN86	Ras GTPase-activating protein-binding protein 2 [OS=Homo sapiens]	FALSK	0	29,42601979	18,67219917	7	31	7	1	482	54,088	5,55	High	High	High	High	High	High	High	High	High	High	High	High	High	High	High	High	High	High	High	High		9908	ENSG00000138757.14	G3BP2	4	regulation of biological process;response to stimulus;transport	cytoplasm;cytosol	nucleotide binding;protein binding;RNA binding;structural molecule activity	Pf00076, Pf02136, Pf14259	0,62	-0,69	76,5	123,5	12,05
FALSK	High	Master Protein	Q08495-1	Dematin [OS=Homo sapiens]	FALSK	0,000564493	4,465521092	5,679012346	2	5	2	1	405	45,486	8,88	High	High	High	High	High	High	High	High	High	High	High	High	High	High	High	High	High	High	High	High		2039	ENSG00000158856.17	DMTN; EPB49	8	cell organization and biogenesis;regulation of biological process;response to stimulus;transport	cytoplasm;cytoskeleton;cytosol;membrane	protein binding	Pf02209	0,62	-0,69	76,5	123,5	31,88
FALSK	High	Master Protein	Q9HBH5	Retinol dehydrogenase 14 [OS=Homo sapiens]	FALSK	0	13,84776829	14,28571429	5	8	5	1	336	36,841	8,79	High	High	High	High	High	High	High	High	High	High	High	High	High	High	High	High	High	High	High	High		57665	ENSG00000240857.1	RDH14	2	cell differentiation;metabolic process	endoplasmic reticulum;membrane;mitochondrion;nucleus	catalytic activity	Pf00106, Pf01488, Pf08659, Pf13460	0,62	-0,69	76,5	123,5	14,19
FALSK	High	Master Protein	Q96EK5	KIF1-binding protein [OS=Homo sapiens]	FALSK	0	11,80771718	6,602254428	3	6	3	1	621	71,768	5,49	High	High	High	High	High	High	High	High	High	High	High	High	High	High	High	High	High	High	High	High		26128	ENSG00000198954.7	KIAA1279; KIF1BP	10	cell differentiation;development;transport	cytoplasm;cytoskeleton;mitochondrion	protein binding	Pf12309	0,62	-0,69	76,5	123,5	17,57
FALSK	High	Master Protein	P49927	Major prion protein [OS=Sus scrofa]	FALSK	0	15,26361237	8,560311284	2	3	2	1	257	27,71	9,32	Not Found	Not Found	Not Found	Not Found	High	High	High	High	High	High	High	High	High	High	Not Found	High	High	High	High	High		494014	ENSSSCG00000007039.3	PRNP	17	cell organization and biogenesis;regulation of biological process;response to stimulus	cell surface;endoplasmic reticulum;Golgi;membrane	metal ion binding;protein binding	Pf00377, Pf11587	0,62	-0,69	76,5	123,5	18,69
FALSK	High	Master Protein	P49366-1	deoxyhypusine synthase [OS=Homo sapiens]	FALSK	0	13,83082816	11,92411924	3	5	3	1	369	40,945	5,36	High	High	High	High	High	High	High	High	High	High	High	High	High	High	High	High	High	High	High	High		1725	ENSG00000095059.15	DHPS	19	cell organization and biogenesis;metabolic process;regulation of biological process	cytoplasm;cytosol	catalytic activity;protein binding	Pf01916	0,621	-0,69	76,6	123,4	10,57
FALSK	High	Master Protein	P53779	mitogen-activated protein kinase 10 [OS=Homo sapiens]	FALSK	0	30,63149738	22,62931034	9	22	5	1	464	52,551	6,79	High	High	High	High	High	High	High	High	High	High	High	High	High	High	High	High	High	High	High	High		5602	ENSG00000109339.18	MAPK10	4	metabolic process;regulation of biological process;response to stimulus	cytoplasm;cytosol;membrane;mitochondrion;nucleus	catalytic activity;nucleotide binding;protein binding;signal transducer activity	Pf00069, Pf01636, Pf07714, Pf14531	0,621	-0,69	76,6	123,4	9,14
FALSK	High	Master Protein	P30048	Thioredoxin-dependent peroxide reductase, mitochondrial [OS=Homo sapiens]	FALSK	0	17,55341987	19,53125	4	9	4	1	256	27,675	7,78	High	High	High	High	High	High	High	High	High	High	High	High	High	High	High	High	High	High	High	High		10935	ENSG00000165672.6	PRDX3	10	cell death;cell differentiation;cell organization and biogenesis;cellular homeostasis;metabolic process;regulation of biological process;response to stimulus	cytoplasm;cytosol;endosome;mitochondrion;organelle lumen	antioxidant activity;catalytic activity;enzyme regulator activity;protein binding	Pf00578, Pf08534, Pf10417, Pf13905	0,622	-0,69	76,7	123,3	10,68
FALSK	High	Master Protein	Q14318-2	Isoform 2 of Peptidyl-prolyl cis-trans isomerase FKBP8 [OS=Homo sapiens]	FALSK	0	32,47205108	19,6125908	6	19	6	1	413	44,621	4,84	High	High	High	High	High	High	High	High	High	High	High	High	High	High	High	High	High	High	High	High		23770	ENSG00000105701.15	FKBP8	19	cell death;metabolic process;regulation of biological process;response to stimulus	membrane	catalytic activity;metal ion binding;protein binding	Pf00254, Pf00515, Pf07719, Pf13181, Pf13414, Pf13424, Pf13432, Pf14559	0,622	-0,69	76,7	123,3	6,9
FALSK	High	Master Protein	Q99569	Plakophilin-4 [OS=Homo sapiens]	FALSK	0	12,17308596	4,026845638	4	7	3	1	1192	131,787	8,94	High	High	High	High	High	High	High	High	High	High	High	High	High	High	High	High	High	High	High	High		8502	ENSG00000144283.21	PKP4	2	cell communication;cell organization and biogenesis;regulation of biological process	cytoplasm;cytoskeleton;membrane	protein binding	Pf00514, Pf13646	0,622	-0,68	76,7	123,3	24
FALSK	High	Master Protein	P35232	Prohibitin [OS=Homo sapiens]	FALSK	0	73,35385401	69,48529412	14	65	14	1	272	29,786	5,76	High	High	High	High	High	High	High	High	High	High	High	High	High	High	High	High	High	High	High	High		5245	ENSG00000167085.11	PHB	17	cell differentiation;cell organization and biogenesis;metabolic process;regulation of biological process;response to stimulus	cell surface;cytoplasm;endosome;membrane;mitochondrion;nucleus	DNA binding;protein binding	Pf01145	0,623	-0,68	76,8	123,2	9,01
FALSK	High	Master Protein	Q58FG1	Putative heat shock protein HSP 90-alpha A4 [OS=Homo sapiens]	FALSK	0	32,89859097	10,04784689	4	66	1	1	418	47,682	5,19	High	High	High	High	High	High	High	High	High	High	High	High	High	High	High	High	High	High	High	High		3323		HSP90AA4P	4	metabolic process;response to stimulus	cytoplasm	nucleotide binding;protein binding	Pf00183, Pf02518, Pf13589	0,623	-0,68	76,8	123,2	29,24
FALSK	High	Master Protein	P24386-1	rab proteins geranylgeranyltransferase component A 1 [OS=Homo sapiens]	FALSK	0	7,665235901	3,981623277	3	4	3	1	653	73,429	4,75	High	High	High	High	High	High	High	High	High	High	High	High	High	High	High	High	High	High	High	High		1121	ENSG00000188419.13	CHM	X	cell organization and biogenesis;metabolic process;regulation of biological process;response to stimulus;transport	cytoplasm;cytosol	catalytic activity;enzyme regulator activity;protein binding	Pf00996, Pf12831, Pf13450	0,624	-0,68	76,8	123,2	9,65
FALSK	High	Master Protein	P11137-4	Isoform 4 of Microtubule-associated protein 2 [OS=Homo sapiens]	FALSK	0	70,0508365	34,52593918	13	63	2	1	559	58,919	9,72	High	High	High	High	High	High	High	High	High	High	High	High	High	High	High	High	High	High	High	High		4133	ENSG00000078018.19	MAP2	2	cell organization and biogenesis	cytoplasm	protein binding;structural molecule activity	Pf00418	0,624	-0,68	76,8	123,2	14,81
FALSK	High	Master Protein	Q9NYB0	Telomeric repeat-binding factor 2-interacting protein 1 [OS=Homo sapiens]	FALSK	0	13,07276578	10,77694236	4	6	4	1	399	44,233	4,73	High	High	High	High	High	High	High	High	High	High	High	High	High	High	High	High	High	High	High	High		54386	ENSG00000166848.5	TERF2IP	16	cell organization and biogenesis;metabolic process;regulation of biological process;response to stimulus	chromosome;cytoplasm;nucleus	DNA binding;protein binding	Pf08914, Pf11626	0,624	-0,68	76,8	123,2	11,39
FALSK	High	Master Protein	O15020	Spectrin beta chain, non-erythrocytic 2 [OS=Homo sapiens]	FALSK	0	72,15699186	9,288702929	18	39	11	1	2390	271,157	6,11	High	High	High	High	High	High	High	High	High	High	High	High	High	High	High	High	High	High	High	High		6712	ENSG00000173898.11	SPTBN2	11	cell organization and biogenesis;cellular component movement;metabolic process;regulation of biological process;response to stimulus;transport	cytoplasm;cytoskeleton;cytosol;endosome;membrane	protein binding;structural molecule activity	Pf00169, Pf00307, Pf00435, Pf11971, Pf12128, Pf15410	0,624	-0,68	76,8	123,2	21,71
FALSK	High	Master Protein	Q8N608-3	Isoform 3 of Inactive dipeptidyl peptidase 10 [OS=Homo sapiens]	FALSK	0,000396275	5,370423321	2,125	2	2	1	1	800	91,071	6,33	High	High	High	High	High	Not Found	Not Found	Not Found	Not Found	Not Found	High	High	High	High	High	Not Found	Not Found	Not Found	Not Found	Not Found			ENSG00000175497.16		2	metabolic process		catalytic activity	Pf00326, Pf00930, Pf01738, Pf02230	0,625	-0,68	76,9	123,1	29,53
FALSK	High	Master Protein	O43924	Retinal rod rhodopsin-sensitive cGMP 3',5'-cyclic phosphodiesterase subunit delta [OS=Homo sapiens]	FALSK	0	9,37270462	20,66666667	2	8	2	1	150	17,409	5,67	High	High	High	High	High	High	High	High	High	High	High	High	High	High	High	High	High	High	High	High		5147	ENSG00000156973.13	PDE6D	2	regulation of biological process;response to stimulus	cytoplasm;cytoskeleton;cytosol;membrane	catalytic activity;enzyme regulator activity;protein binding	Pf05351	0,625	-0,68	76,9	123,1	51,4
FALSK	High	Master Protein	P36551	Oxygen-dependent coproporphyrinogen-III oxidase, mitochondrial [OS=Homo sapiens]	FALSK	0	20,53497566	16,74008811	6	11	6	1	454	50,12	8,25	High	High	High	High	High	High	High	High	High	High	High	High	High	High	High	High	High	High	High	High		1371	ENSG00000080819.6	CPOX	3	metabolic process;response to stimulus	cytoplasm;membrane;mitochondrion	catalytic activity;protein binding;structural molecule activity	Pf01218	0,625	-0,68	76,9	123,1	8,25
FALSK	High	Master Protein	Q9NQ29	putative RNA-binding protein Luc7-like 1 [OS=Homo sapiens]	FALSK	0	21,56367604	12,12938005	4	10	1	1	371	43,701	9,92	High	High	High	High	High	High	High	High	High	High	High	High	High	High	High	High	High	High	High	High		55692	ENSG00000007392.16	LUC7L	16	cell organization and biogenesis;regulation of biological process	nucleus;spliceosomal complex	protein binding;RNA binding	Pf03194	0,626	-0,68	77	123	13,07
FALSK	High	Master Protein	Q8IV38	Ankyrin repeat and MYND domain-containing protein 2 [OS=Homo sapiens]	FALSK	0	15,61627896	10,65759637	5	9	5	1	441	49,267	6,25	High	High	High	High	High	High	High	High	High	High	High	High	High	High	High	High	High	High	High	High		57037	ENSG00000106524.8	ANKMY2	7	regulation of biological process		metal ion binding;protein binding	Pf00023, Pf01753, Pf12796, Pf13606, Pf13637, Pf13857	0,627	-0,67	77	123	18,65
FALSK	High	Master Protein	F1SRI0	Trafficking protein particle complex subunit 2 [OS=Sus scrofa]	FALSK	0,000112082	7,195861249	15,71428571	2	6	2	1	140	16,404	6,52	High	High	High	High	High	High	High	High	High	High	High	High	High	High	High	High	High	High	High	High		100513447	ENSSSCG00000012124.3	TRAPPC2	X	metabolic process;transport	cytoplasm;endoplasmic reticulum;Golgi;nucleus		Pf04099, Pf04628	0,628	-0,67	77,1	122,9	5,74
FALSK	High	Master Protein	Q9H479	fructosamine-3-kinase [OS=Homo sapiens]	FALSK	0	11,37472172	10,03236246	2	6	2	1	309	35,149	7,55	High	High	High	High	High	High	High	High	High	High	High	High	High	High	High	High	High	High	High	High		64122	ENSG00000167363.13	FN3K	17	cell differentiation;metabolic process	cytosol	catalytic activity;enzyme regulator activity	Pf01636, Pf03881	0,628	-0,67	77,1	122,9	15,5
FALSK	High	Master Protein	P16402	Histone H1.3 [OS=Homo sapiens]	FALSK	0	30,43127165	19,45701357	5	107	3	1	221	22,336	11,02	High	High	High	High	High	High	High	High	High	High	High	High	High	High	High	High	High	High	High	High		3007	ENSG00000124575.6	HIST1H1D	6	cell organization and biogenesis;metabolic process;regulation of biological process	chromosome;nucleus	DNA binding;RNA binding	Pf00538	0,628	-0,67	77,1	122,9	36,85
FALSK	High	Master Protein	P01112	GTPase HRas [OS=Homo sapiens]	FALSK	0	30,39648499	58,2010582	7	13	2	1	189	21,285	5,31	High	High	High	High	High	High	High	High	High	High	High	High	High	High	High	High	High	High	High	High		3265	ENSG00000276536.4; ENSG00000174775.16	HRAS	11; CHR_HSCHR11_1_CTG8	cell death;cell organization and biogenesis;cell proliferation;cellular component movement;defense response;metabolic process;regulation of biological process;response to stimulus;transport	cytoplasm;cytosol;Golgi;membrane;nucleus	catalytic activity;nucleotide binding;protein binding	Pf00009, Pf00071, Pf02421, Pf03599, Pf08477	0,628	-0,67	77,2	122,8	10,67
FALSK	High	Master Protein	O43813	LanC-like protein 1 [OS=Homo sapiens]	FALSK	0	9,252353974	13,53383459	4	6	4	1	399	45,254	7,75	High	High	High	High	High	High	High	High	High	High	High	High	High	High	High	High	High	High	High	High		10314	ENSG00000115365.11	LANCL1	2	regulation of biological process;response to stimulus	cytoplasm;membrane	catalytic activity;metal ion binding;protein binding;receptor activity;signal transducer activity	Pf05147	0,628	-0,67	77,2	122,8	12,79
FALSK	High	Master Protein	Q13454-1	Tumor suppressor candidate 3 [OS=Homo sapiens]	FALSK	0	13,24371667	14,08045977	5	7	5	1	348	39,65	9,91	High	High	High	High	High	High	High	High	High	High	High	High	High	High	High	High	High	High	High	High		7991	ENSG00000104723.20	TUSC3	8	metabolic process;transport	endoplasmic reticulum;membrane;mitochondrion	catalytic activity;transporter activity	Pf04756	0,628	-0,67	77,2	122,8	8,18
FALSK	High	Master Protein	O75899	Gamma-aminobutyric acid type B receptor subunit 2 [OS=Homo sapiens]	FALSK	0,000396275	5,330543442	2,550478215	2	3	2	1	941	105,754	8,66	High	High	High	High	High	High	High	High	High	High	High	High	High	High	High	High	High	High	High	High		9568	ENSG00000136928.6	GABBR2	9	cell communication;regulation of biological process;response to stimulus	cytoplasm;membrane	protein binding;receptor activity;signal transducer activity	Pf00003, Pf01094, Pf13458	0,628	-0,67	77,2	122,8	25,91
FALSK	High	Master Protein	Q9UBC2-2	Isoform 2 of Epidermal growth factor receptor substrate 15-like 1 [OS=Homo sapiens]	FALSK	0	74,54550175	19,67032967	16	41	16	1	910	99,545	5,08	High	High	High	High	High	High	High	High	High	High	High	High	High	High	High	High	High	High	High	High		58513	ENSG00000127527.13	EPS15L1	19	cell differentiation;cell organization and biogenesis;cellular component movement;metabolic process;regulation of biological process;response to stimulus;transport	cytoplasm;cytoskeleton;Golgi;membrane;nucleus	catalytic activity;metal ion binding;motor activity;nucleotide binding;protein binding;structural molecule activity;transporter activity	Pf00038, Pf00261, Pf00529, Pf00769, Pf01496, Pf01576, Pf02050, Pf02321, Pf02463, Pf02841, Pf02994, Pf03148, Pf03962, Pf03999, Pf04012, Pf04111, Pf04156, Pf04912, Pf04977, Pf05103, Pf05149, Pf05262, Pf05276, Pf05478, Pf05483, Pf05557, Pf05622, Pf05667, Pf05701, Pf05816, Pf06008, Pf06160, Pf06818, Pf07111, Pf07321, Pf07798, Pf07888, Pf07926, Pf08317, Pf08614, Pf09311, Pf09726, Pf09730, Pf09731, Pf0…	0,629	-0,67	77,2	122,8	8,44
FALSK	High	Master Protein	Q15811	Intersectin-1 [OS=Homo sapiens]	FALSK	0	41,40333805	8,483439861	11	26	10	1	1721	195,3	7,77	High	High	High	High	High	High	High	High	High	High	High	High	High	High	High	High	High	High	High	High		6453	ENSG00000205726.14	ITSN1	21	cellular component movement;metabolic process;regulation of biological process;response to stimulus;transport	cytosol;membrane	catalytic activity;enzyme regulator activity;metal ion binding;nucleotide binding;protein binding;structural molecule activity	Pf00018, Pf00168, Pf00169, Pf00621, Pf02050, Pf02463, Pf02841, Pf03938, Pf04111, Pf04502, Pf05557, Pf05667, Pf06818, Pf07653, Pf07946, Pf09726, Pf10174, Pf11559, Pf11600, Pf12128, Pf12718, Pf12763, Pf13868, Pf13904, Pf14523, Pf14604, Pf14915, Pf14943, Pf15346	0,629	-0,67	77,2	122,8	14,27
FALSK	High	Master Protein	Q08722	Leukocyte surface antigen CD47 [OS=Homo sapiens]	FALSK	0	8,006663867	5,882352941	2	7	1	1	323	35,191	7,21	High	High	High	High	High	High	High	High	High	High	High	High	High	High	High	High	High	High	High	High		961	ENSG00000196776.14	CD47	3	cell organization and biogenesis;cellular component movement;regulation of biological process;response to stimulus	membrane	protein binding;receptor activity;signal transducer activity	Pf04549, Pf08204	0,629	-0,67	77,2	122,8	30,34
FALSK	High	Master Protein	Q01538-2	Isoform 2 of Myelin transcription factor 1 [OS=Homo sapiens]	FALSK	0,000112082	7,478642078	1,829268293	2	3	2	1	1148	124,998	4,93	High	High	High	High	High	High	High	High	High	High	High	High	High	High	High	High	High	High	High	High			ENSG00000196132.11; ENSG00000276876.4		20; CHR_HSCHR20_1_CTG3	regulation of biological process	nucleus	metal ion binding	Pf01530, Pf08474	0,629	-0,67	77,2	122,8	34,42
FALSK	High	Master Protein	Q9Y4D1	Disheveled-associated activator of morphogenesis 1 [OS=Homo sapiens]	FALSK	0,000396275	6,700521031	2,782931354	2	4	2	1	1078	123,396	7,23	High	High	High	High	High	High	High	High	High	High	High	High	High	High	High	High	High	High	High	High		23002	ENSG00000100592.15	DAAM1	14	cell organization and biogenesis;regulation of biological process;response to stimulus	cytoplasm;cytoskeleton;cytosol;membrane	protein binding	Pf02181, Pf06367, Pf06371	0,63	-0,67	77,3	122,7	13,88
FALSK	High	Master Protein	Q9Y4G6	Talin-2 [OS=Homo sapiens]	FALSK	0	387,9251409	43,50904799	75	174	64	1	2542	271,443	5,57	High	High	High	High	High	High	High	High	High	High	High	High	High	High	High	High	High	High	High	High		83660	ENSG00000171914.15	TLN2	15	cell organization and biogenesis	cytoplasm;cytoskeleton;membrane	protein binding;structural molecule activity	Pf00373, Pf01608, Pf02174, Pf08913, Pf09141, Pf09379	0,63	-0,67	77,3	122,7	16,74
FALSK	High	Master Protein	Q96KR1	Zinc finger RNA-binding protein [OS=Homo sapiens]	FALSK	0	48,68001843	13,59404097	11	25	11	1	1074	116,939	9,04	High	High	High	High	High	High	High	High	High	High	High	High	High	High	High	High	High	High	High	High		51663	ENSG00000056097.15	ZFR	5	development	chromosome;cytoplasm;nucleus	DNA binding;metal ion binding;protein binding;RNA binding	Pf07528, Pf12171, Pf12874	0,63	-0,67	77,3	122,7	18,7
FALSK	High	Master Protein	P68431	Histone H3.1 [OS=Homo sapiens]	FALSK	0	59,44893852	52,20588235	7	134	2	1	136	15,394	11,12	High	High	High	High	High	High	High	High	High	High	High	High	High	High	High	High	High	High	High	High		8968; 8352; 8351; 8355; 8357; 8358; 8350; 8353; 8354; 8356	ENSG00000197153.4; ENSG00000275379.1; ENSG00000278272.1; ENSG00000277775.1; ENSG00000273983.1; ENSG00000274750.2; ENSG00000274267.1; ENSG00000197409.7; ENSG00000275714.1; ENSG00000278828.1	HIST1H3F; HIST1H3C; HIST1H3D; HIST1H3G; HIST1H3H; HIST1H3B; HIST1H3A; HIST1H3E; HIST1H3I; HIST1H3J	6	cell organization and biogenesis;coagulation;metabolic process;regulation of biological process	chromosome;extracellular;membrane;nucleus	DNA binding;protein binding	Pf00125, Pf15630	0,631	-0,66	77,4	122,6	7,33
FALSK	High	Master Protein	P10644	cAMP-dependent protein kinase type I-alpha regulatory subunit [OS=Homo sapiens]	FALSK	0	21,12836132	17,32283465	6	19	6	1	381	42,955	5,35	High	High	High	High	High	High	High	High	High	High	High	High	High	High	High	High	High	High	High	High		5573	ENSG00000108946.14	PRKAR1A	17	cell organization and biogenesis;cell proliferation;coagulation;metabolic process;regulation of biological process;response to stimulus	cytoplasm;cytosol;membrane	catalytic activity;enzyme regulator activity;nucleotide binding;protein binding	Pf00027, Pf02197	0,632	-0,66	77,4	122,6	18,31
FALSK	High	Master Protein	Q14244-7	Isoform 7 of Ensconsin [OS=Homo sapiens]	FALSK	0	10,3057257	4,6692607	3	6	3	1	771	86,9	9,77	High	High	High	High	High	High	High	High	High	High	High	High	High	High	High	High	High	High	High	High		9053	ENSG00000135525.18	MAP7	6	cell organization and biogenesis;response to stimulus	cytoplasm;cytoskeleton;membrane	protein binding;structural molecule activity		0,632	-0,66	77,4	122,6	21,41
FALSK	High	Master Protein	Q8WVV9	Heterogeneous nuclear ribonucleoprotein L-like [OS=Homo sapiens]	FALSK	0	43,17056565	27,30627306	10	19	10	1	542	60,045	7,72	High	High	High	High	High	High	High	High	High	High	High	High	High	High	High	High	High	High	High	High		92906	ENSG00000143889.15	HNRNPLL; HNRPLL	2	metabolic process;regulation of biological process	membrane;nucleus	nucleotide binding;protein binding;RNA binding	Pf00076, Pf13893, Pf14259	0,632	-0,66	77,4	122,6	12,19
FALSK	High	Master Protein	Q8TCA0-1	Leucine-rich repeat-containing protein 20 [OS=Homo sapiens]	FALSK	0	7,8636169	20,10869565	3	3	3	1	184	20,496	6,55	High	High	High	High	High	High	High	High	High	High	High	High	High	High	High	High	High	High	High	High		55222	ENSG00000172731.13	LRRC20	10			protein binding	Pf12799, Pf13855	0,632	-0,66	77,5	122,5	21,09
FALSK	High	Master Protein	O15400	Syntaxin-7 [OS=Homo sapiens]	FALSK	0	13,89774206	22,22222222	4	16	4	1	261	29,797	5,55	High	High	High	High	High	High	High	High	High	High	High	High	High	High	High	High	High	High	High	High		8417	ENSG00000079950.13	STX7	6	cell organization and biogenesis;regulation of biological process;transport	endosome;membrane;vacuole	protein binding	Pf05739, Pf14523	0,633	-0,66	77,5	122,5	18,85
FALSK	High	Master Protein	Q9NZJ7	Mitochondrial carrier homolog 1 [OS=Homo sapiens]	FALSK	0	27,02979828	21,85089974	7	17	7	1	389	41,517	9,32	High	High	High	High	High	High	High	High	High	High	High	High	High	High	High	High	High	High	High	High		23787	ENSG00000137409.19	MTCH1	6	cell death;cell organization and biogenesis;metabolic process;regulation of biological process;transport	membrane;mitochondrion	protein binding	Pf00153	0,633	-0,66	77,6	122,4	11,11
FALSK	High	Master Protein	Q7L2E3-2	Isoform 2 of Putative ATP-dependent RNA helicase DHX30 [OS=Homo sapiens]	FALSK	0	45,06131404	11,04746318	12	17	12	1	1222	136,03	8,6	High	High	High	High	High	High	High	High	High	High	High	High	High	High	High	High	High	High	High	High		22907	ENSG00000132153.14	DHX30	3	cell organization and biogenesis;metabolic process	cytoplasm;mitochondrion;nucleus	catalytic activity;nucleotide binding;protein binding;RNA binding	Pf00270, Pf00271, Pf04408, Pf07717	0,634	-0,66	77,6	122,4	8,88
FALSK	High	Master Protein	Q9ULP9	TBC1 domain family member 24 [OS=Homo sapiens]	FALSK	0,000112082	6,851676951	3,577817531	2	6	2	1	559	62,879	7,36	High	High	High	High	High	High	High	High	High	High	High	High	High	High	High	High	High	High	High	High		57465	ENSG00000162065.12	TBC1D24	16	cell organization and biogenesis;regulation of biological process	cytoplasm	enzyme regulator activity;protein binding	Pf00566, Pf07534	0,634	-0,66	77,6	122,4	9,7
FALSK	High	Master Protein	O00139-4	Isoform 4 of Kinesin-like protein KIF2A [OS=Homo sapiens]	FALSK	0	57,93833751	22,44623656	13	32	13	1	744	84,037	6,37	High	High	High	High	High	High	High	High	High	High	High	High	High	High	High	High	High	High	High	High		3796	ENSG00000068796.16	KIF2A	5	cell differentiation;cell division;cell organization and biogenesis;cellular component movement;transport	cytosol;membrane;nucleus	catalytic activity;motor activity;nucleotide binding;protein binding	Pf00225	0,634	-0,66	77,6	122,4	11,42
FALSK	High	Master Protein	P56545-2	Isoform 2 of C-terminal-binding protein 2 [OS=Homo sapiens]	FALSK	0	48,17057399	13,60406091	11	29	7	1	985	106,121	8,02	High	High	High	High	High	High	High	High	High	High	High	High	High	High	High	High	High	High	High	High		1488	ENSG00000175029.16	CTBP2	10	cell differentiation;metabolic process;regulation of biological process	nucleus	catalytic activity;nucleotide binding;protein binding	Pf00389, Pf02826, Pf03154	0,635	-0,66	77,6	122,4	7,16
FALSK	High	Master Protein	Q9ULR3	Protein phosphatase 1H [OS=Homo sapiens]	FALSK	0	21,02366639	15,95330739	7	10	7	1	514	56,413	6,6	High	High	High	High	High	High	High	High	High	High	High	High	High	High	High	High	High	High	High	High		57460	ENSG00000111110.11	PPM1H	12	metabolic process	cytoplasm;nucleus	catalytic activity	Pf00481	0,636	-0,65	77,7	122,3	10,72
FALSK	High	Master Protein	Q00610-1	Clathrin heavy chain 1 [OS=Homo sapiens]	FALSK	0	541,7430886	62,74626866	81	574	81	1	1675	191,493	5,69	High	High	High	High	High	High	High	High	High	High	High	High	High	High	High	High	High	High	High	High		1213	ENSG00000141367.11	CLTC	17	cell differentiation;cell division;cell organization and biogenesis;metabolic process;regulation of biological process;response to stimulus;transport	cytoplasm;cytoskeleton;cytosol;membrane	protein binding;RNA binding;structural molecule activity	Pf00637, Pf01394, Pf04053, Pf09268, Pf13838	0,636	-0,65	77,7	122,3	5,78
FALSK	High	Master Protein	P50395-1	Rab GDP dissociation inhibitor beta [OS=Homo sapiens]	FALSK	0	114,7211543	48,76404494	18	104	2	1	445	50,631	6,47	High	High	High	High	High	High	High	High	High	High	High	High	High	High	High	High	High	High	High	High		2665	ENSG00000057608.16	GDI2	10	metabolic process;regulation of biological process;response to stimulus;transport	cytoplasm;cytosol;Golgi;membrane	catalytic activity;enzyme regulator activity;protein binding;RNA binding	Pf00996	0,636	-0,65	77,7	122,3	5,28
FALSK	High	Master Protein	Q9HCC0-1	Methylcrotonoyl-CoA carboxylase beta chain, mitochondrial [OS=Homo sapiens]	FALSK	0	13,5777672	5,150976909	2	3	2	1	563	61,294	7,68	High	High	High	High	High	High	High	High	High	High	High	High	High	High	High	High	High	High	High	High		64087	ENSG00000131844.15	MCCC2	5	cell organization and biogenesis;metabolic process	cytosol;mitochondrion;organelle lumen	catalytic activity;nucleotide binding;protein binding	Pf01039	0,636	-0,65	77,8	122,2	17,15
FALSK	High	Master Protein	O43310-2	Isoform 2 of CBP80/20-dependent translation initiation factor [OS=Homo sapiens]	FALSK	0,000396275	5,839711587	5,333333333	2	2	2	1	600	67,741	6,54	High	High	High	High	High	Not Found	Not Found	Not Found	Not Found	Not Found	High	High	High	High	High	Not Found	Not Found	Not Found	Not Found	Not Found		9811	ENSG00000282825.1; ENSG00000134030.13	CTIF	18; CHR_HG2213_PATCH	metabolic process;regulation of biological process	cytoplasm	protein binding;RNA binding	Pf02854	0,636	-0,65	77,8	122,2	9,15
FALSK	High	Master Protein	Q9H6R3	Acyl-CoA synthetase short-chain family member 3, mitochondrial [OS=Homo sapiens]	FALSK	0	10,78505434	4,956268222	3	6	3	1	686	74,73	8,63	High	High	High	High	High	High	High	High	High	High	High	High	High	High	High	High	High	High	High	High		79611	ENSG00000111058.7	ACSS3	12	metabolic process	mitochondrion	catalytic activity;nucleotide binding	Pf00501, Pf13193	0,637	-0,65	77,8	122,2	11,22
FALSK	High	Master Protein	Q96AE4-2	Isoform 2 of Far upstream element-binding protein 1 [OS=Homo sapiens]	FALSK	0	77,66888395	41,04134763	20	69	1	1	653	68,562	7,31	High	High	High	High	High	Not Found	High	Not Found	Not Found	Not Found	High	High	High	High	High	High	Not Found	Not Found	Not Found	High		8880	ENSG00000162613.16	FUBP1	1	metabolic process;regulation of biological process	nucleus	DNA binding;protein binding;RNA binding	Pf00013, Pf07650, Pf13014	0,637	-0,65	77,8	122,2	26,73
FALSK	High	Master Protein	Q8TDN6	Ribosome biogenesis protein BRX1 homolog [OS=Homo sapiens]	FALSK	0	7,730030819	6,798866856	2	3	2	1	353	41,375	9,92	High	High	High	High	High	High	High	High	High	High	High	High	High	High	High	High	High	High	High	High		55299	ENSG00000113460.12	BRIX1	5	cell organization and biogenesis	nucleus	RNA binding	Pf04427	0,638	-0,65	77,9	122,1	15,48
FALSK	High	Master Protein	Q8IX01-1	SURP and G-patch domain-containing protein 2 [OS=Homo sapiens]	FALSK	0	48,30364724	15,7116451	13	26	13	1	1082	120,132	7,28	High	High	High	High	High	High	High	High	High	High	High	High	High	High	High	High	High	High	High	High		10147	ENSG00000064607.16	SUGP2	19	metabolic process	nucleus	RNA binding	Pf01585, Pf01805, Pf12656	0,639	-0,65	77,9	122,1	7,54
[truncated: 3,254 more rows]
[truncated: 25 more columns]
