# Supplementary figures and images for: IL-18 and S100A12 Are Upregulated in Experimental Central Retinal Vein Occlusion
Source: MDPI journal article supplement (doi:10.3390/ijms19113328), 2018-10-25

Fibronectin  
RVO

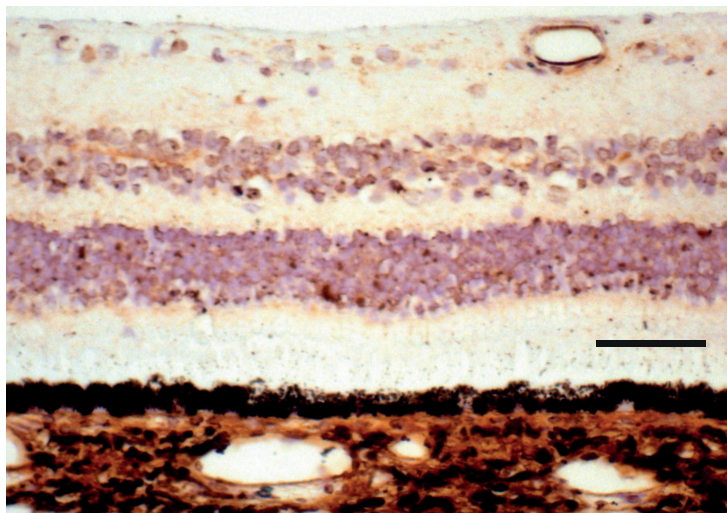

Fibronectin  
Control laser

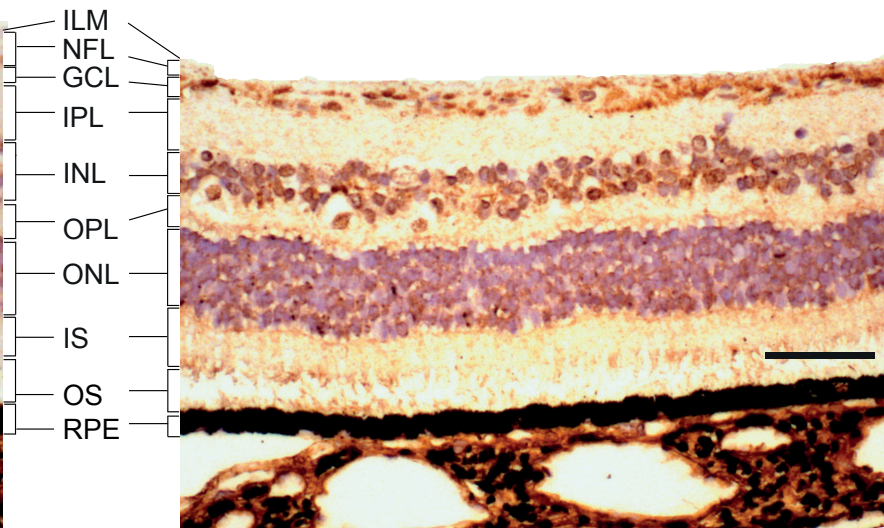

ILM  
NFL  
GCL  
IPL  
INL  
OPL  
ONL  
IS  
OS  
RPE

Supplement: s1 [file s1]

# Cluster analysis of upregulated proteins

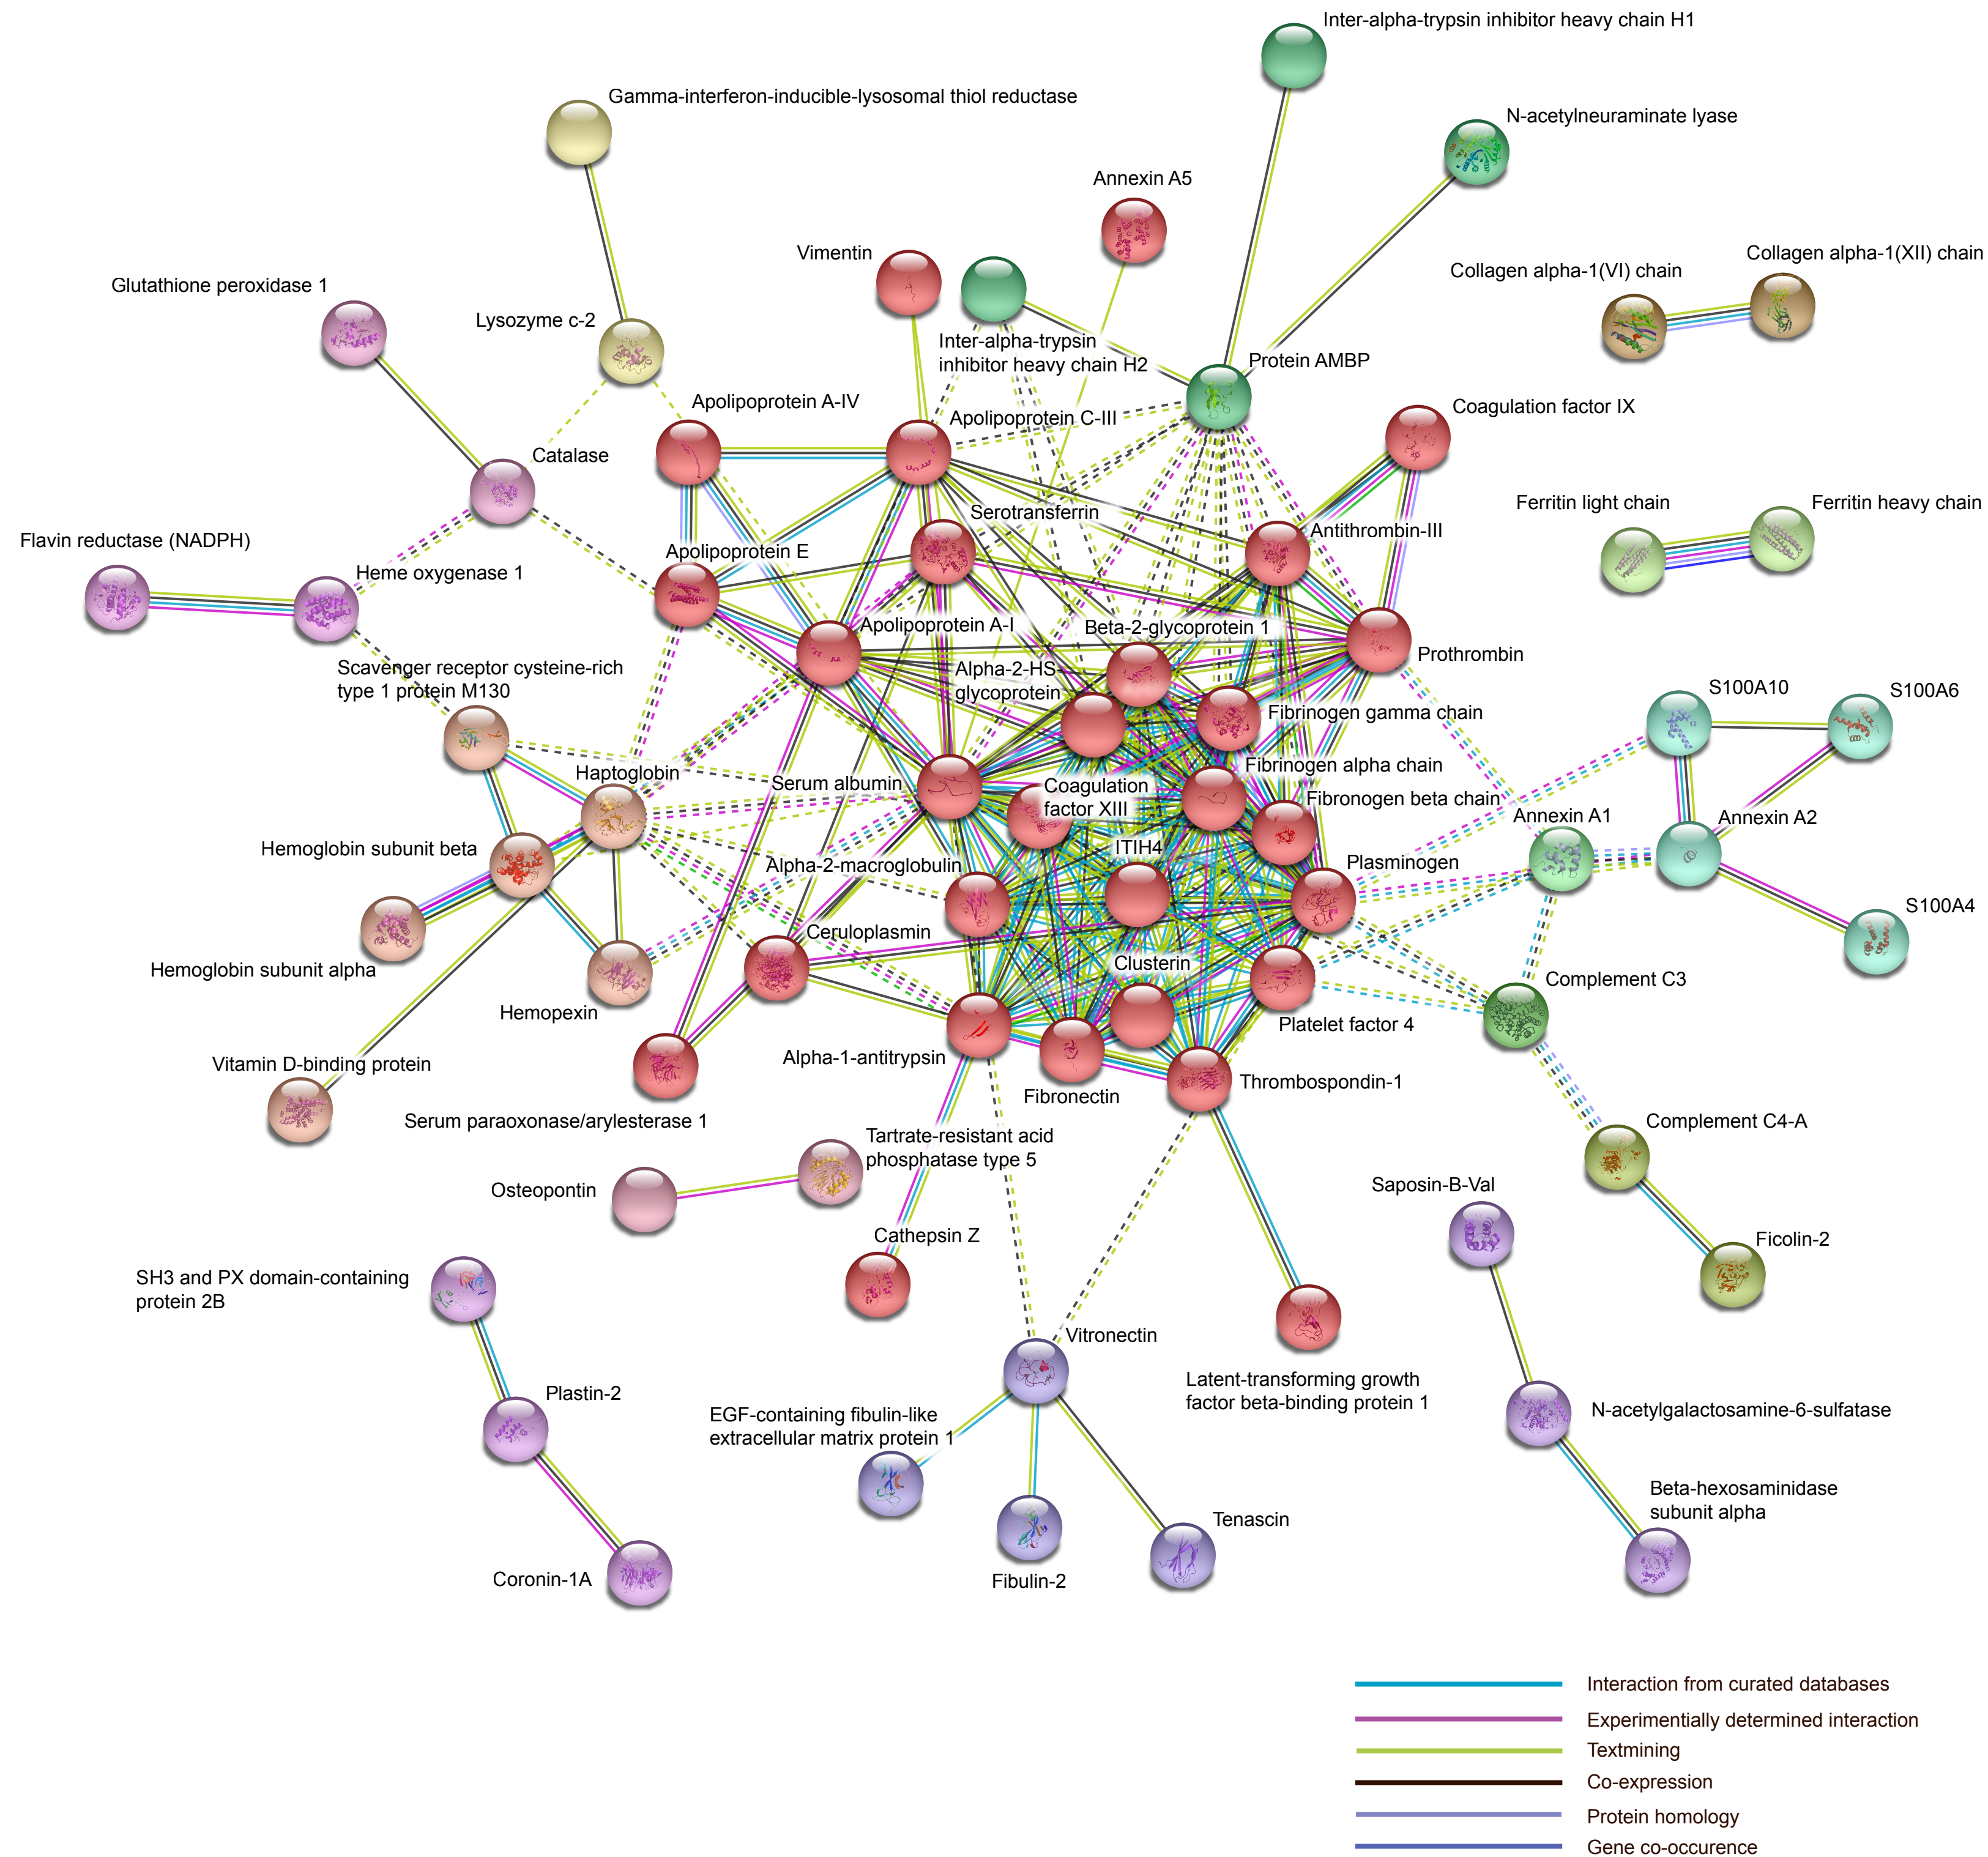

Supplement: s1 [file s1]
